# Supplementary material for: Genome Sequencing of Xanthomonas vasicola Pathovar vasculorum Reveals Variation in Plasmids and Genes Encoding Lipopolysaccharide Synthesis, Type-IV Pilus and Type-III Secretion Effectors
Source: Pathogens. 2014 Mar 18;3(1):211–37. doi: 10.3390/pathogens3010211 (PMC4235730; doi:10.3390/pathogens3010211)
Supplement: Supplementary File 1 — Supplementary Materials (TAR, 5271 KB) [file pathogens-03-00211-s001.tar]

Archive with 59 entries (56 files):
- supplementary
- supplementary/._.DS_Store
- supplementary/.DS_Store
- supplementary/data
- supplementary/images
- supplementary/._index.html
- supplementary/index.html
- supplementary/images/gene-content-versus-Xcm2005.pdf
- supplementary/images/._gene-content-versus-Xcm2005.png
- supplementary/images/gene-content-versus-Xcm2005.png
- supplementary/images/gene-content-versus-Xcm4384.pdf
- supplementary/images/._gene-content-versus-Xcm4384.png
- supplementary/images/gene-content-versus-Xcm4384.png
- supplementary/images/gene-content-versus-Xvv1326.pdf
- supplementary/images/._gene-content-versus-Xvv1326.png
- supplementary/images/gene-content-versus-Xvv1326.png
- supplementary/images/gene-content-versus-Xvv206.pdf
- supplementary/images/._gene-content-versus-Xvv206.png
- supplementary/images/gene-content-versus-Xvv206.png
- supplementary/images/gene-content-versus-Xvv895.pdf
- supplementary/images/._gene-content-versus-Xvv895.png
- supplementary/images/gene-content-versus-Xvv895.png
- supplementary/images/._S10.png
- supplementary/images/S10.png
- supplementary/images/._S11.png
- supplementary/images/S11.png
- supplementary/images/._S12.png
- supplementary/images/S12.png
- supplementary/images/._S13.png
- supplementary/images/S13.png
- supplementary/images/._S14.png
- supplementary/images/S14.png
- supplementary/images/._S15.png
- supplementary/images/S15.png
- supplementary/images/._S16.png
- supplementary/images/S16.png
- supplementary/images/._S17.png
- supplementary/images/S17.png
- supplementary/images/._S18.png
- supplementary/images/S18.png
- supplementary/images/._S19.png
- supplementary/images/S19.png
- supplementary/images/._S6.png
- supplementary/images/S6.png
- supplementary/images/._S7.png
- supplementary/images/S7.png
- supplementary/images/._S8.png
- supplementary/images/S8.png
- supplementary/images/._S9.png
- supplementary/images/S9.png
- supplementary/images/._Slide1.PNG
- supplementary/images/Slide1.PNG
- supplementary/data/._.DS_Store
- supplementary/data/.DS_Store
- supplementary/data/snps-alignment.fna
- supplementary/data/._Xcm4381_PIP-boxes.html
- supplementary/data/Xcm4381_PIP-boxes.html
- supplementary/data/._Xvv702_PIP-boxes.html
- supplementary/data/Xvv702_PIP-boxes.html
