# Supplementary material for: Genome Sequencing of Xanthomonas vasicola Pathovar vasculorum Reveals Variation in Plasmids and Genes Encoding Lipopolysaccharide Synthesis, Type-IV Pilus and Type-III Secretion Effectors
Source: Pathogens. 2014 Mar 18;3(1):211–37. doi: 10.3390/pathogens3010211 (PMC4235730; doi:10.3390/pathogens3010211)
Supplement: Supplementary File 1 — Supplementary Materials (TAR, 5271 KB) [file pathogens-03-00211-s001.tar › supplementary/data/snps-alignment.fna]

>Xvv890
TATCCagTCAACCCGcACCCCgctagtAggGCGGCtgtaacaggTctgacacActCTAgGgGCCcaacTcGcaAcgATacaaAgcaCGgTgagtCtcCgtgGgGgGAccggccCCTCAGCccTACTCacCTAccATgAaGATcTgCTcAgTcGgtgGAgACacagACGCCATTTCTacGGtcTACaGTcAGGCgtTTCgtcGccGTgCGAGCGGGAtATACGGcGCCTCGTCTTGTTTCAtTTAtgTtaCggTgcCGccccccTTATTCcgaggTgcagCAcAcaGcgagGAcgGtCGcTTCGGACgATATGAGTAGcgcGACcTGCATAGAGgGgCCgcggAAcACgtTGAGAggActTGGATGAGAACgAgCcagGgTTgAGGGtcaTTggActACggtcgggcCGGccgtcccTACAAcCctTAgcgctacaaggggagtacgccccgcCcgccgcCcccggGGtTaccAcGagccaaatcggcgcggagtgacattgggcaGcccgaggcaCccagagcttgtgaccgggATTAAcTAaaTTGgAGGCCTCTAAAGGTATAACCTCGTgGGTGGgAGCATAAAGTGTTACTCCTGGAGATTATCGGTCTGTTTACGTTTGTATTCCCGCAAGCCCGCgTACCgGGCTACCCcATTGcGAgtgcgcgcgCTCAAGcCATCgTTgtcgtcgAACTcaGAGgaTagtTgATagGGAagTgGTgTaccggGCCCTGtcTgcCGGCTAcTATgTcAGagcgcgcaGAGAATgTCAGCAAAcCGCTTtaAcCcgCTGCGGcTgggGGTCGGAgtcgAtTagAtgtgcgtctggaccgctcggaCaTCccAgtTtctggGggTCGTTccAATCgCTcGTAtgcTTTACgAgGgGTTCTACCccTTGggGGTACTTTACAgGTTGGGTAGCTAgATCTGTATACCGGAATGAGGATATTCTATcACTTACTATCATGGAAAAATGGCTTCCCCAtTCTGCGcTTGctGGCAGTAGATAAAcCATACTaTCGGCCTCGcGCAAATCTGTCGCGCCGTAGGTCAtGACGCCAGAGAGCTTATTTTTCTCATCAACTTTTCTtCACGcTGcGCTCCTcAATCcGCCGgAcCCGgcTtCggGgCCCACGAAAAAtGCGGCGAGAGACgCTATATCCTGTtACAcACAGgCGGCCGGACAgTCCTCGAcCTTtCGGCGcTCCAgTCtCATCGtgTaGAgAGcCGtTtccTAagcaTGGATATGCCATTCCCCGACTTGGGGGGCTTTGGCCTTCTTAACGGGTTCTTTGTGCTTgATGTATTTCTGTTCCACAcAGACATCTGTACacCcgacccctggtgtccggagccTacGgttgGtTAttggccGcTAaCctACCCGTTAGCCGGTGTcCTTCGCCGGCggcGCCTAGGAAccACAAGGGcCCcGCGaaagAggcGATCgcgTCACCACATgAAgACTCTGAGTGGGGGCAATATCTAgCATCGgCCAAACCCAGAAgtAGgatTGggGtctTgcccAAccCgCCctaAcGccTcTgtCcacccAAggTCAAcCAAcgaccGtgtgcccAaCccggGagTGGaTtcTCtaTCcTtAccgCtTggaACagttcGTAcACCGTAcgccCccggggTGgTcATtcACcaggTTGCGCAGccgTTCTccTgGGTCCAgCATTATTCTTAGTCCGCgAGCGTTTggcaaaGggGcagcTACTaatTAcCCCGaAaTCcGTTGgAAaAgcGcgcggtTTgTcGGccCTCGTGtTAaagcccaccgcagcgactcttGAATcCGGcGggggtggtgtcggatgcgtggcgccgtgcAGggggttggtggCtaGCtcgacctacactCCTgCGcttTCACgTtAccGCcgCagcccATCtCAGgctgcgccATCATaTgctgGgGACTGgCtAATggtccGAAcTGTcTTcTACgGCCGGTATGCgtaaGGGTCtATCCTAGgTAGGcaCGTCacCgACCTgTCcTGTCGcAATAATGcccggGTgAAtgCCCAGGcTGGTgCGACCATGCtCGCCAGACTGGcTGAcTCCTAATtCcaTTACCTCAaGATTGTTCTGcAGTCCCGACCgAcCTGaGgAGCCcAaGTCGTTCcaAGTGTCAGCCGGTGCCGCCCATCAGCCTTTTGGACTAAACATAGGGGTGCAACTCAGTAGAGAACGAGGATCTATGGGCGGGCTTAATCggcccgagAttgaAccCAgggaGaCgAcacgGgggCacCgccccagacacGTttTCGCgGTaagGgctTAGCTAAATGTtccTcCACTccTcAATATAACGCCCGTTAAGgGCtTCCTATTTTTTTCCTAATTGTCGTGGCCTTTTATGTTGACGCCCACGCCTTCATTGACTGCAAGTCCCAgGAGTtAcgggAgcaaTAtCccagaccaACTAAAAGAGCCGGctCTCgacatacccCcgtggccgcgtcCTggTGTgcATTAGTACGtCcACAAggTTTCTCTAAGCACAATTGGGCACCCATTTAcTAATAATCGGGCGCTATAGGGCGACAcgTGgCTgCAGcCCATTTGTcGGCAggGCtTaTAAGcGtCTcCcgccGgggGCCGTGCCGAATTcGcTCCGGACCGTAgTgTGATCTACCgAAAAtcccTGTAGCGGTGCAAAcAagTCTCaggtgAgAacATTcagAAACATcgcggATTGGaGTAATGACGATGgAAGAcCCATAAAACCTCTGTGAAgCCCAAgCCCTTATCGGATACCGGGTGGATcgACTcCTcaGCtGAcCTAgCGATAgGGGCACGTgACTcAAATAGGcATCTCAGTCCCTTCTcTATGCcgGGcCGCgCCCTAGGATCaGGtACctgcgGCCgCtcatcTAAGGcgTCCGGTAgCCAAATGTGAATCTTCGAGACATATCgCTCTAGAAGATACAGCGTTCCGCAGGTCTGCCcggGgcGcGgtGgcTcGCAgTagccgcgcgcctacttacAgggggggTcggagacggcttTCtAAGgcagTcggAgTtaagtaggCATTgATaGcCcCTgcAtCcCTggttgtcttcATAaCAGggaTgaccggccgTctGcgcggTtgtttaTCgGAAtAgcgggccccTcaaCgTatTAAcgcagctggcgccggccggtgcgacGAGAtggctATAGactAATaCggAGaGTCCACGACCAGAcGAGGCTGGCCACTGCGGCTTGAGATATACGGCACGGGTGGAACTGGTTATCTCACGAAGGCTCCATGAgcCCGATCTAAgCGAgaCcCGATccATGGTccttaggttAgagcgggctGgTGGTTcgCcAgAGATCGgcAGccgTcGGAgTggggccccgaccgggCTGgTGGTTCTGAGCGCGTTCCGGACGTaGATCGTCGGTTTTAGTTGTTCCGTTGCTGCcCTGCGtGGTCcGcGgCCtCAtATcCGGCTCGAcAGaaCctGgacTAggCtgGccCCTTTTAAGTCAaCGTCCCTACGTCTgATAGCcTACTTATTGTCGGGCTCTCGAGgCGCCCCTcTCATGTTTTCGAATCTATTGCGATTATCCAGACGGCGCCgCTCTTACGACGTTTCACTTCGTCATCgCATGTTcccATAgCTCACCGGTAggCGAcCaaATAcGtcacgagccCCtgtcAAcacCACCAgTGGCTAACgAcATGAATcCgtcgaGAtCCggtttGCACacAGctctgatggTcgcCTTTACtaTAGgaCgTCCcggccgggtGCcAtgCGAGAtGCGaGTcTCCGAcCCGTAcGgTttgCacccgCCTAgCTcGCTCGCGTCcATAgAcAcCGGCTCTGAGCCCGcTTAGGCATAAGGTCCTGgGATgcCTGaGcCTcATTTGGCGTacgaGCTAATTtATATGGGATAAGTCCCGTCAGCGCGTTACtGtgaGagtgcaggTctAgccgtgTtcgtcccgcccgcCccTGCCGTtgTAgCacgcCAtTcTGGGAgAcGActcccgGgggtggtcctCgccccCaTAtgaTCCggcgctccgTcctgccggTtACggTCTTgAAgAaccgcGgCagccAcgtggcacgggGtttgctccCCTcaaTCCAGTGAgCGgCTTgcAAGGTACATTCTgAGggAAgACCCGTTcCTTATGACgcCGccTgGGtgtCacagtaaatttgttcgtttacattcgggaccggagtattgcctgagacggggCttgacaaggagacgttCGcatacccaatcAcccTacggcgAAAgTCaGTCgacGggAccactgtcCccccgcacccgccgCGAAAAAGgAAAACGAAAgCTTGGCTGGagccgtctggAcgAacTccgggcaccAggggggaacgcGcggcgatcGgacggcccggctttcttccgccGaCtcgaTAgGttgaaAgccgaatgagcctggtcAgaTccagatggtaaCggcCGCagggggAGCGGcgAgGCggTCTAGaTTTCCTTAAGCCCgTGGCACAGGAcCGcAGTTCTgccggcgcgtacgcctctacgcCGTtTGTCTCTGAGCTTACTGATGGCAATTcGATgtcaCgGcCagTgccgCTAggGGGAAcGaAcGCGGGAcTATTGggAtCCAgTcAcTcCattgAAAAGatCCACTggcGcACTTGGgcgtccGTCGcgTAaaCTGgtCgaatccGcctaaaagtGgTctacCCTcCcgagGgagAGTGCTccggGTtgcggaggtcgaGtAgtcctaccccgcgaTaccgTAcCTaacggcagctaGtTCAaGAGCgcgAagAcatCCgccgggtAGccAATTAGGGCTTctgAagTACGTgcCACcAAcTCcCCAcAgCCgAAATcTgGTAcgtTGGGTGTTATAGGgGAgaTATgAcgggcAcctagcCccCcgaggagggtGgcgggcccttgAgaGtcggcAccTTccGccagcgccttaCtgtCggGcAcgTcgcggcctgtccctCTgcgttccccagCgcttcAcGCTTAGTGAGACCACCcAAAAATGCCCCTCAGcgtGAccAGTgGaagCgcggcaccgAcattgggCTccaatTCcgcAacagctctgcgggtagCGctccaccctaCcAcagccaatACGCCccAtcGtGgCAgTtGtcgtgcgctgcgggcccctggctgcAggtCaCcgTcAgagggcGGTAATGGAgCcATgGTTCTGGTTcGcGGGGGCCcAtCgGgATAAGAgcgcggaggccGgccggggCTtctgAcccgcggtTcaGGgAGCAgTcCGTGAcgaCGTGCgAACTTTACtCGTAGGcCCGCCGACTGCCctGTCaCaATACggtAgcccTCAgTCatgggCcaactTgAggACGaccCTTggTCGcCgCTAGCGgcGgcgTcTccgaCgtCcTAgGgAGcTATGAATcTGctaCcgggGctagggcctgaaGccggCTgccgcAgcgaccccCagcaAaaccccccagagcatcaacAgcTCAggCCGcCgcCggggacgcgattcacTTGTgCgaGAacTgCcAcAcGgTtGcCGCatcctGGActgaTGagcctcgtgccccggccccATtcTcAACTCTACGCTATAaccCTCcCTGGtAGATGCGtcCCAGcgTCTGTTcCAGgAcGcttgGTgaccgcgggAAtCGTTTTCCTATTATTGTGTGCCTCACCGTACaGTCtTACCaTAGTGCcgtgCgCcgATgCggggCTGATgagagcgggGgagccCCgGCCCGAgGcGATATTgAgAAAGAAgGCgGAAATCGGGGAgGGCTGGGGCTCCGCCcGAGACAGGCAAGCGGTTAGAGCATGTGGAAATTTATGGAATGTTATtGAGCGtAGCACTCATgTAcgctCggccaTtataacgcGtgTggcGGTgagacccGttGccctgggaacGGCCgAgAAAAAgGAgTtggcgtTagCtTTgGacctagcAAgAcCtGcctCgGcgAGTAggCATcTAAcctTTAAACTACggaACTCccCtACGgTAgTcCTAGTCGCCACAACATTTGAGCGGGCATAGCgGccGGGATAaGgTGCGtgaGtTGCGGgCCcggTCtggTTgtcAaacTCaGgTGtAGagGTccTGtcCTATCTTAGGGACtCTAAgtTAcggTagcTTCTCGgtacctCTgcccttctggGtAATTTTaaTcAgATTGgcCcTTCcTTTAcCcctcAgcGCTGGagCgACcAcTacatactAaggCCcgcGTggCgTCGACTGcTCCACccTAGCTACACgTTCcGgGtctgAcAcccCACgAGGAgccAtGAGTcCTGCtTaccTcAcaGcAAGTTTTTGTgGGTACaTTcGGATCTTTACCTGcTACTACTCCAACcAGAAAATGCTgAtAtaGGTCcAgTtcggTTCcGTCCGCcAtGGAgcaAgAATGggtaagcgCgTTGggGCcTAGTTgAGCCCgcCTCAGCTggggcttGgGTCTAgcCCCTTcTcagcgCgGAcCCGccAatcTgAcCTTAtcgcACGACTTATTtTGcgcgTgTTTGgAATTTCgTTCgctccggggGaatttTgggCaggggcgGgcccCtcGGGgtgTgccccTTgAtCtggCcgTgCGGCACGAcTCCCTCtCctCaACGcTCTgcACTTcACgatgCTCTGAGTcAAAATCGGaACcAgtTTCTgcgAAAATGTAGCgAcTGgGCTTCAGtTCGATGgGCcGTAcAGttCcGGTGCTGAAGGTGTGGgAcACTCGCAaAAGGcGCCGCgcTTGCCAAGTTCACCGCTCTAcgcTCTagtcgaCcgcGCcccTggcgcaaggAaaaTGCGCCCCTAACCCcTTtgtccaacCgacacCgcTAGTccctcGggcaccgGgCTCCaTTAcCgTGGGGcgAccTTgTTcgCGTGCTaggtaatcagcggaAAcGgTcCCTTAcCCccaTAAGCctCgTgtcgCAgcaGTGcgctcTtgGTTAgcTACgAggcGCcGTAgTGgGACTTTTCCCGTAgatggAcgAcGCTGATACCAtCTCgggCGcgCcCTGGcaCGCCTTGgTGGgGCGGTTATGaAAaGgCCCagcgCagaccaagtaaTActgAcgcCgCCCTATGGCGCTTCCGTAGaAGcATAggtgtCTTGGgtcgagacttcaccaatggtcatcgCctgcactTgGaAattgaTCaGgggccgGacaTTGCGGcCGTatCCCGCCGCTCcCGTCAGTAACTAAcgTCAcaAGAATTGCTCggcgAttcTgaaCCCTTTgcCTggATcctGCAcCgcGTgggcgcaTgacgtCGctaTaAGgcacagGCgCtGgTagTaTGAGTtccGcCtgtcccgcgctaacTGTTCTTTTTcgaCgTTCTATAGCCGcagTggtcgCGCAAtcCGAAGGTtTgCgtggGaATccTgTTCtcTTGTAGGGtTAcctgggCgcgCcGCCtGgACGTcCCcTTtcaGTTCAAATGACCAAATcAcTGCAaCAcACaCCGCTCCCAAGAATGCACATgTgCcAGCTAAGCTCCAAcTACGGGATCTTGCTTCCTGAGTATTGgCAGTGCACTTTACTGTGAGTGGAGACGGTACAAATCGgATcGAAAATgACCTTgTGTTCCATCGAAATTTGATGAGAAcGATCATTTTCTCGTTTCTAGTCGCCTCCgCCTCTGACCCCATACCCTTTCTCCGCTGCTAGGAAGGGGCTTcACTGgATCtTGGGCtCcgTCGTTGATcTCTgGGAGcCgcGgGAcGcgTgACCTCTTAGAGAGAAGAAGgTGTCTAGCgCTcgggccaaTtcCTAAACGAcCAAttgcTCCACgGAATTTAAGTCGCtGGgTATGTATGCaTATGCgATAgGcgggCGGAATGCcgcagGCcgggcgcccaaagcGTCtATggcTATccAagCgaactgTccCTCccATTAAaGgTCccTGAtgGgcgaacTgTaggcggggagcaCgctcTTTgAgTccCgcagcgCCGATCGTCTgGACCGGTGGGCAGATCGGGTAGGCATCGAGTGCAATTCCAACATAGAAcGATGAATCTATcCTATCGAAgTGCGCAGCCGGTATTTCTTTATAATCTAAGGCTCGAGACTAcGcTGTTTTGATGTGGGCGTTAAACGTGCCAAAAAGAAAGCCCcAGCTGCTCGGGTTCCTGTACTCCTGGATGTgcgGcgTGGGATGgTTTAggAACGTCTTcCTCTACAGcAACTGGACCCtTACGGtgtttggcctTtAGCAaGAGCGGTATCGAgCgccggTgtcgtcaGaTGATCTGTTtTTCGAATGACGAGACACCCgcaAcgcGggcCGcaAccGGcgcgcgccgCgTcTagcTAttTCtATATCTGAcgCgAcACGTCGGgtcCTCaAATGTCAGACACGACgTgTTCGGGTgtCcTAtGCcctCtggggaCcACgCgTCGATGAcAtCcccgcaGgtGCGGTTaAGggcGacAaGAAgTGGCgCATCcGgcctaacCccCTCgCcccatgtaggggtacacgggaccgcgcgcagaaagtatagttttgtacgcccgccttgtCAagcaacacaaggcgagaaaggacacgAAacccgaccccgCTATACtCgtcgAtcagatAcTggGcgccGGTTCCTgttctgattAcAGAGaATACACGTgGcAgCCTGCCTCCGGTcATAGgATTCCGGTCCCCGTTCATGTTGGTTCTTCGCTGGGAGCTTCTGGCGcAcTAACTGCGAGGAGCGggCGCGGTGTCCGCCTGTCTGGGGTGGAAAGTGAGCGATAcATATATAgGCATGGgAGTTTgGGgGgAGAgaCATCGGcGAgaCgGcCgCGcCAAGcGTTGCTgTTAGAGACcGCCGGAGAGCGCTGTcaaatAAGCCAgGgAccATgGtcaaCcgtcgtCggggaGcCGGtcTggGCCtacgACGaAacTTTTaACTCccgAACgcCgCAGGTcGGcgaGgggggAcgTcCCCGACTaGAGgggTatgcCatcggtgaccagcgagagagtggcCGAcTTAgaTttcCcggtAgaagttACAccttccATTcGcAtTcacacCgTcgtggacCCTGcGAGCGAgtTAtggggCTcTcaccccGacATTgcgtTgacgtacgGCAGggAGTAGTCGcGTTACCcATCgcgggCGGcTTGcgaTCtgcCcCcaGgGAgCATggGAtGAagccGCTAgCTtTAAgGAgcgCAGGAGGCtTgGAAAcCCCTCCCgTGGACAAggcgCgttAAGTcCggGgCcacgcgcAgCgCGcgCcgcCGACggttgtcTTGTCGggggGTgAcACCACgTCAgCcAAacAgcGCTggtCAGGgTCccACAgtGgacaGtGcGGCggATcagcgctctGAGgGGCaggcGTtaCCGAaTGCCgGcgGGCcATGCCTCATCGGCGATGTCaGGGTaATCGctcGGTcctgctgGATccgtgggtgAGCCCgGTATTTaGCcTGgcTAGTACGcCcCTgAcACcGcAacTtatCActTCaGTaCcgcgctgtgctcAacagggtcgTAcggctccGgTgcaggGgCCcaaGGtCagaTaGtTtGcgcGcgacaacctttagATGATTTTTCGGTAATCCAagAACCgaAGCAgCACcTTAcGgTaGtGcCCaAaGTCCAGTcCGTTtCACTgctcATtAAaCgcagAgGAGCTCAcTCcgTGAccggGCAGGGAATCCcGTGTACTTTAAAgTCTgCGATCTGTAGGTTCCGCATTCACGTCAACGCCCGTGTTGTTcTACTCTTTcAGCATAATGATGTTCCAGTAAAGTCGgcTTCCGcGTTATGcTgTAAgGAATGTTGTTCCGCCTCATTATTTCgCACACATTCTcTcGCCGctgCgtGcAgGGcTCgTGcgcGTaGTggAGGTTCCTTgATATTTTtCAGgtgTCggcAACaAATTTTTGccCcTTTGTTCgggAgtcgTcgACTGGgGTGGCCACGTTTGACGAGTTAAATCCCcTAGTGgCTGcGTAAggGgGGCCATcACgGTcCcCCAtTGgCATTTACGtCCgctaGGGATACAccCGGCgGGGAGCCcCACtGgGAgATGCcataCAtgtatcGGcTGcGAATGgtGctccgtCgccacgggacgcgCggCtctcACCgggaCcggtCAgaCcTAggTGcGcttctCaaacgcaccgtagccggcTtgTgTCacAacgcGCTCgAgcggtcgccagtcgctCCtcccTggAggcCACcggcAggTGggtatgAtaCGcGcAGCGAtccTCtGaAAgGGcGTGCtGAcGGCAgAATGCatcagcccaggAgCatgggcgcctgtCtccTTCTGCCGCGCTGccGTCCGCAcAgCCTACGCGCGATGGGAAGCGGGcTGCGACTAcAATAGGGTCcCccTcATAcATTACGTgGggCTAcGcCcGCgAATGCACACGTAGAAGCAGCCACGTcACAGTTGAATcAcAgcgTcGtcaCGGATGgCATCTCGCcTCTAGATTACTTCACGCATGGTTACTTAAAGTTCtgTCgCCAACAGTCCCGccTCCGTgCGCGTAAGGACTGCCTCTCCcCGATCCCGACTGTGAGCCTCTcGgAACCcAGgATggagcgcATCgTGtAcGCgATTAAcctCcCACtgATcGTGgTTTccccTGACAACCCTgTCAgcCCccGcGGTcCGGcccggccgcAagaacAgcGCcggTATTATCCCTTACTCTTCCGCGTAAaGACGAcGAaAATATAGCgGGtAGTAGCACACGCTCATAGCAAacATcGATGcTTTTTCtcGGGTTcGCAacgCtAccAccccGTTGTcTACCGTcGaGGctCTCTgaAcTccCacggctaaacCTCTCTAgtacaggGGgAtCCCCccGTGACGCGCgcGtgcgGaGTCATCCAcGGtATtAGCcTTCCTTTACCTaGAATTTTCTGCCCgATCCCgCcAGTTTAAGGAGTACTGGGGCTGTTAATGTCATGCACTAGATACATAGGGCAATGACCaAGACCCTGTGCGCATCAATAGCAACTCCATACGGAAAAtcgGaCTgATcTcCgAGgGCCcgcctgcaaTTTTTTGctCacAGCGGATTTggCTAcgcTgcAGAccgagtctGaGCGgGCTTCAATCCCggcACAGTACGcCCCTgGcgTTGCGTGCCcctAcAgGgTgGaaCgtAGTgGTggCtgccgCCTtGCcTgAaAAAgaTgaaAATGAGGggATGGTCGACCGGTCACCTATAgTGTAgCCGCCTCGGGATCTTGTTTGCTGAACTTGaTCCgaCGcctGAAGCATCTcGATgCGGgTATTgAGAAAgGacgcgGTcgaCTGTACcAATTGCcgagCTAgTtcgcgCctaGAAGTcAAGGGCGGACAGATGAAACGCCCGGAGGtTCGGCgCAcgCAaCTgCCTATCCaCTAgACGtatcgcgcGGGcGcGgctgcccTcggacGAtGCTTTCGgcGTTCATGcaAGcaATAGgttgaTcgTAGcCCCTGAcCGCCGAcCTGTgAcAgcTctAGTgGcAGACTaCCCcggggtgttAggcgaTGGCCAGCGGCTCCGGCCtAACTACccTGgGCTGCAGGTGACGGgAgcGGGCGTTGGAGTGGGCGGGAAACAGACAGaGCCCTcGgGAcCGTCGATGTgcgcagAgtATTTgccATACTCTCacgAacagTgggCgagcCGGGTGCCCCCGCACGACCCGgAggcCAgcgcgcggcGTCTcGAGCAgCGCcGcTTCCcggAgAcGTcTgACgacgCctCACAATCCCAGaacatTTGAATctcTCGCCTCGccTcTGcggccccgccGgtcaGagtcctTCgAgggTgtagggGgcCGaattCCCCCGgtGTTgTgAcaATCGAaAGCCTCccacTctGaGgagActTtcgcTGTAcCGGgcccgcagggagGcGAAATCAGGCCGCTCAGCTACAACCCAATGGGgggCGTCTGcTGCGATagggcTCTcgggcggAAGtCAaAcggTGgGCgGAGAGGgAcGAGCCAGtATAAcgcTTTAATTGAaaGATATATTGGAAggGGAGtAcgGTCTGTTTGAAGCGGAGCGCTGAAAGCACAACAGATAACGCTGTTAAGCTACCACAgGGTctCATAGGCAAccTCgGTTAAaATgTAgACcCgTAGcacCGGAACGGAggcCTCGAagacgtaccctgcgatcAcctcctccggtttcGcccGCcccGtTacgcgatctAcAtcctgtctgcCcTggcgcggggaggggtgCctcaccggagaTccatggttcccTcAcCAtctcatggctatcgcaacgtcaaagtggcacCgctaatgGAtagggCccgaggccccggcgCCTTaGCTATAAtggCGgtcgCtcgTtTCaAAcCCGgTgaACATcCAAGTTAGTGtaCgCAgAgGTACCTCcCTTTCACGgGttcGggTTTgGcgcCAaTAGAgTTCtTGcTCGGATGAAcTTgACTTAAaTGCCCCAGGAGGGAcTGTGAAAGAGTCTTATGcGCCGAAgGACAGAAATCAACCCTAGGGCAGCGACCTCGAATGGAGAAAAGcGGAccCagATgTTCAGACCGgTTCCGGcTGGCGggTcATTtCTcGAAGTTAAACAAagTAAcAAggcgCTGccGCGcgtcTCACGcATAAGAGCATGCGagAGAGTTACGCgcACCAtAcTTTgaTacATGCTGTcgGCGcgGCTCccTTAggagagccgggttCgGcTTACtccccTtagcggccGTCcTcgaggccgTccCCtTagCggcggTGTATGGTgactccATTTCcAGTTGgAgGCCTCTACCTcgccgggcccctgccgGggtTAAGTACCCCtctCcgGagtgtGAGCCGaagCtTgGgagTAggAcgcGGgTcAgcAAaCccctcGGtcgcACCaAcGggccCaAcccGgtCGGAgggtgggggCCgTCCGGTCAcATTACACcCgccACccGCAATATgcAATCCCaGTCCGAAgCCgACGTCATAACTGGCcAGTAGCGTTgGATTACcacgccTGgAACgCAGAGgATGctgcAgATgCcGTTGAATTGCTaCCGAATGCGCgcTATCTggTCTCCGgctTcctgGCGCTCGGGagtgaGACatTAcGcgccccggggggaggcAcggtgggtctccgaAgGGTTCtCATGCcGAgGCGACAAGGCAGCACTgGAAGAGAGCGGGcCTGTTATGTATGGCTAAAAAAACTATATAGCGTgGACATGGgCTGcTTAGGTGAAGCCAATGTgACGGTCGGaggttccgtggggaggggtcgggggGGgagCccAGCgTCGAAAGcgGTGAcCtAaAACCAAGTTCCgCgaggttgGTCTCCTgTTcAGtTTcCAGGAAAGCAcAATTCcTagCgcAcgGTCTGCAAAGgCATAACCACAGgcgcaCATCGGGCCAcTTCggAGCTccGgCcGgCCcgccttgagttatcGAtcccctttcgcgGtctcatAcggGAAAGGaCCTAtctacggcccttcTcCTgTGactATCTggcccGCAACTCtCtagAGCTGtGGCGACTTcTAggcAAAgGgggGCGCGAcccAATtTGCAccgacGGcccTcgaCGCgAtcGGTAcGGTTCACAAGATCCCTagCCAAGGGtTAAGCggcTcTatGTCtaTggGcgaACACGCCTCgGAAgGTCtAAGgcGGaCgCAacGgTCCTtccggggggtaAcTTcCGGATTGTGGTGTTTAactttcgggcggtgAGACCAcgTgtgagGAgggaGGGAcGcAGCAgCagcCgCGcTcgAATTTAgaCCAAGTGCGGAcTgTCgTccGGAGctCatGGACTGTTcCgCaGcgcaacccctggCtatctaCCcGcCgtgCTaccTACgTGgacGccTGGCcCGtGTTcTTCCaatTACgAaAgacgttCGTAACaCAAATTAACCCGTAAGggAGCGAAcCATCGGTGGGATGATGCCGTTACCGAgATAcTAGAATcTCGTTAGTTAATAGTctccTAGTCGTGCcacagTCgcaggAgCcCggaCTTTTCTTCTAGcAcacCATATTGGcaAgATtgGAagAatccgccTCAGAgcGGgAcCCACCACCATGAcAAGAgcAGTcGcctacaGAGGGACGAACTGCGCACCGTCCTcTTTGGCAACTGATATtATcAACAGCgAAgGTCTCACCTGCTATGGATTGGCGTCcCGGgCGATAGCCGTTTCAGGCCgGCATTCgCGcCCtccctgcaccTGACACCAACATAATtcGTTCTCTaAAAcccgCCGCCCATctcGcTgaGACgCccTgGagTTCGCTCCTAcGCCCTGCTtgcGgccCTACCTctcgGCTTCTACCGagctcGCgGGgGtAtgaggatcgGgATggcgcgtCtCaTaGaGGcGcAtcgCgAGTaTCACCCGGTcTccgcagGgctCCCgCCCcCTACCTacGCGccAGATACCATggAtTCGgcCggGggggcgcTGCGCAAGTCAccTTGTGACGATAGCAAagtcaTgAGacaAGcacTAGcCcaCCgtgGccCacGCaCCATCGagGGAGTTCACGACTAATCcAATTATGGGGTTATGTGGTTGATCCGGATTTCTAGTTGTTGCCGttcgCTCgccAGTTggtcAcCCCTTGcgTgttggtaTaACAGGGcCccGcCCCTgctGAacgCaGCCCACaAcGTTCCCTCAACacAAgCTCCAAATAGCCATTTGgctgGGTAcCTgCGCgttgtgaaTCGCCTTCTgCaAgtctcggctCATCTCCTAcACCTACAGTTCTCTTCCTGTGCCGTGTcCtggGccttcgagGgtccCAGTggGgacgGATATggccgCGTcAAGGcgCcTcTCcctTaAtCCGTTGTGAtGCGAAATAacgggctggcCcGGGcGccGGaTACCGACAcCAAATtgtCATcGaagggtCCGCAGAGACCTCTCgAGAATGACTAACCAatcgcgtggctgcgcgtacgaTCcCACCAAGTgTCcTaaaAAcaGGGCGtTGGaAGAgTGCGACCATCCcACCACCGGTGACGTTTCTCTCTTTCCTCGccACACTTTCACCGCCTATtGGCCTCATTTCCGCActCATGATCCCgGGGTgcTCCTGAgcaATCACcggccgggggtgggacagggCATAGTTACTTGTACGTTTGCCCCATTCAGACCCAAGACTTTTGGgGTTTGCCAggtcGCggaaAAGGAGGGcgtCCcCTtGCGGGGGGCaggATggatcgctGACTGccgAagaATTCcgcggTggAAcAtagCggcgCgCtccgaGtgggAcgatgagCgGgcagcccccctctATcgcgcCtCggaCgccACgtctcataCCTGggcTaccGCgGActcCTgtgTaccccctgtctcCcttCgcGtccTCgAtGcagccgTGcttgggctcgCcAGagcagtaccgAtcAACatgggcAGTTAAGcaACCTGATcctcccCGgtgTcgcCTGCCGgGcaCCGTGGTGGGTTATGaCCAgagagcgtgtaccagctAaTgGtATACAGgTTGTCAAGAgtaGGAtTCgCcagCTAAACTAactTgcggaTgCTggcattgtggcCgaTcCgatCcCATcgcACgctggcTTGgTCCgTacGAGTAcATTAAGGcCTcAGTAAcaccaTCGgGAtCTggCcCaagccGGTaGtTTGCccGcGgtctgTaagaGgcgcgcCTCGCgcACtGcTcgTCgggggCAGgcaGcggtTAGGTTTTgAcgggcCCcGggATTACcgATATCCTgTAgcTTaTgTgggCgTATcCAGACAcACCCGACAgTCAATAGAAGCATTgcCTTTaCCTggGCtAGAAggAcGCGTcGAAATTgAaCaggccgAACTAGcCAGCGCCAATGCTGTtGCAGCACACGCGCCCTATTACCTACTCgCATGGAACTGcGAgatggAgAgaAgtacatgCgcaTcGTgTCTgAcTAGATCAACTaAgTAGgagCggcgCGgAAGGGGACTACTCGggaAgtCttcgGTAggCgAATcAACgTCTgccacAggggCctAaGcaGATgGTGCaCCgTcCtGcGAgCAcCAGGTTCGCTAATATTCCtCAGCTAaGacATcGGGTatCaGccCcGcCGCGCGCtGACAAATGGCTTACTCGATGGGTCAAGgATGACACGgctGgactccaAcTGcCCtcgTgCcCcgGGTCTcTtCcACgACcTGGAAGGAAgCTTGTcCAGaCTGCGCTTGggTtccGttgtagGcggcgTCCGCtgCGcgTTcggagttggcgAaggaTggATaaCGCCcTtggccccctaGGagtTactACCtGACCcgTctAacTTGcCcTACTATtaacgccgctgggcgagtcggaGActgtAgagTTaCcTCCGTgAgtcGaGgATTTGctGcaTgaacccAgaacggGCTGCgGttgtgcgagatcgggccagccgccattcagccctatacaataaGacGcccgaCggggggggggccgctaagaataAgcgATGGTCTACGGctCggccgcTTATTTgAcTaCtTtAcGtacgtAttgcccgGGTcgATAcTAtGAGCagtgaggcagcGCgacgaCgtagacctcgagcgcgtgggcagggcgaaaatcAgcataccatgggggCaacgaccagcagTtgGCATGcgTACAACggacatcaacgtaTccggaatgccgggTaggccgTgacgATcagacACGCCAAAGCTTcgtgaTGGCTGTGGCGGCGAACAGgtTCTcagacccTcCgCCCcAgGaaccTtccGCGatCgcTcCGGcAcaAagCtcatgcCgGgTTAAcGTCGGCTCGTagcacTCACTaGcaGATGAgATTCGAGTgaGTCCAtTGAgGATAATTCcCTTACATCGGAcTAGAATGtCGAACTCTCCCCGCTGCTAAGgTTGTGCGACGCTTCTACgGCCGATGCCTgGTTTTCTCCACCGACTGCTGGAAAAACGtCATAcCgcATggCaGAGGGTTGGTTTcACCCCTATCACCTGTGCGTGGTCACGGTCCCCGAATAATAtTCGggttAACGGGCgCAgGTCgAcCcAtccGTggTgTccATgcgatGaCAGCAcTGcGGgGGcCCATtAcCCAGGGCACCTcTCATGAATAcGGCgATGgccCcACgGAcacGTGGAAAGGCTCTGGGTgGAGTTAATATGgccgaAgTtgGccTCccGAccAgGCAaagCTGGagcccgagcggggcggcTcGTcggCgcacgccggagcCTtgGCGGCGtGGTcGAcGTGTCgcGCTGTGGgCTATCAcgACTccAgtAActcctctCATGTTgGCAcgctCGTggccgCAGTTgATTAgGTGAataccGTATCCGGCcgATTGGgtgTAAAgGTGTTTgAtcggaGGAGTgCaACgCGTGcAACcGgcAGAACGTAAAGGTTtGTGGGAACcttacttCCAaaTtAcggaggTgCagcgGttcaaAgAacCGctcCagAgTCATtCTCcGCCCTTGGTCGGCTgGACTGgCTGCcTggAGCgcTcgTGGAgcCgTCGATgGctGcACtgGaacacccCcgtcaTCGTacgtcAggggccAGAGTcgcTATtGCGTCcCTGATTAGTTCAGAATCCTCGtgGaTaTCCaTctcTTGATTtcCATGTgcTCGCGCCAcacccaacctggtacacctcggccTgtCctacCgTTATgAAccgtCTATACgccccTTTGgCGcaAtgccagctCcaggCtTTGTCGGAGGCCGGATGTTTCAGCTCTACGCGCACGGAGACATGTCTTGCCcGTCtAGGCGaccctgattCgcAgTCCGCgtccGGTgcgtccggcacaCCTTgCAccTccgTAAGGTgcgggccACAgAACTaGGactAAGcGACAGgCAATCGAGgccTtacTcAccgcgtgcgcacTggggccgGtcaGTgGAATCTATCCAAACgTGcCagtAAgtgaCgagCGTCcgccCTgcaTgggATcacTCTGGTGaacggTTgATgTgTcgcTCGCGGcGgCAATTAGTTTTATTGcCCGAGTTGgCCaTCGTACTGCCGTACtTCTAACCgCcCAATAcTTGTATTGCCGgcgcgtGgcgatcttGacGcTAATCGGTCTGCATTGGCaTACTCaGgAcaggcctCaAtTgAtccgcgggctCTCTtGCGgGTAttcttcgcCgcaAgTTAtcgCGAgggaGccctcggcGTgtcccgCCgGtccTCgctgtctgacgGGAaggcaatggcCaacgacTAGGTCTTGctggTCTGTcGGATCtggtgcACcTTTatATTCGAccatgAaacgTCCcGtcCTcGctgtAAAaggTgcgAGGTTGTGgTtcTgcGTAATtccAACCCTgggcgGACTtTcCAgAcGgAggTTcggaaaGTGCACTgGCaCTATTgtGGTgTGGCTAgggGTCAcTaCGcGgcGtaTGGgcgaacctCTGtacgTCAGCCAaTAAggAggcTAcGTGccGGGgAggcgGCTAAcggtACTAcAATTacTaCTTTtTGCCgGAtagCCttcaacacCTgcctcctTgcAgtggTGaTaGgTcAcgAATagcgtaGTCATcTGGACTCCATggTGcGCGTcCGAACcAGCcCCCCccctcagccgccctcggggtaggggccctcAttgtaTgtCTCAAAaAAGCAGcTTAgGGCTACgtcGAcCaTTAcGACATCGAGCGTGTAgTATGCGGGAGGGcAgATcGCCccagctggCGcTcagTTaaCgGCcTCgTggTggggaCtctgccTgtgGAgccggAtgcGGGCCAACGcTggTTTTGGATGTgGGGCCATTGTGATGTCAGGCCACTGTGTTTTcGCCTTCTGTCGaTCCcCCCcCGTGATTCcAAGAGcagAcgtCATACAGAAgCtcgTgacgAcgtcGTcGGGGGAggaAcgAcCCGGTgAgTCcgCGAATTGTATAGTtGAccATAgGcTccagccggccGTGAgaGgCgccgTGGcCTTgcCgCGGCTGACATaGTgcAgAAcATgTcGATCtggaAgggTCgTCGCgAAgatgCGCAcGAGagCgccatggaggtgcgggacttCAagtcctgGcgcgcggctaTTtTctgatccgccAgctggtcacgtTCctgccaggtcacTCcagGCTGAAgAtAtcctcTagcGggcgcccaTcccggtctTggagggcctcccgacgggCccgcgctcGgCccgcggtagggtccggTcccccccccttGTccCTccgataaggcaTgTtcccaaattcctggacccgtccgggcattatgcatagGcagGAcCacCTtcTcaaTgAggtgtgcggggcctctccAATCTGcGGAtAgTGggagacgatgcaaaggatctgCcccggtcggTcgtcgagcgGaacaaccgggggaatcgaaaagcgacggtcgcTgACAGgTTATGCGTCAGcCGgTCAAGACCgTGAGATGGTgAAACACGACCTTATAAGTATATGGCCCAtGGTGTTGGAgCCCTcTTAACAAcTAGATAcTAGCTTTtgACccGGgaGCCACGACgttcCgtgTGCGAgAGCGcGATAGACgTgTGGCATACaAAcCTATCgCtcAccACaaGCTCGCggggtcgccgtcgCTCGATCggCgTTATccgctccggaAgggagcgtagagaCtgaggctaaAacctaTgGaagaTtgccccAgCctagGgACGGAGTcTAtatTcctcgggtccggcgaAgcatgAcgtctgctgcacagCcggggcGcgtgaCcGgactaGcaTCCCcGGgCTCgGtCgcGtcCCTTGGGGTAcCTActGGcGTggCcAATGtGACgaaccccacccGgtccgtCAAACAGGCGAcgTAAacactAaacaTGccaggAGcCTAggTcAgtccgggtcggcaattggtttcCGagGAggCggTgAcTCTAGAGCATgACAgaGAgggGGCTATTGTCATCGAagAATAAAAGCTAATAATCTGGgCCAACACAAGAGTACTTacGgCTcTCAGTTAtcgGaAGGGTTCTAGAtGCTGCGcGcGAGGAAgGgcgCaGCtCTcGTGgCTtCtcctgtgaCcccgcccggtccgcGctcgAcGcctcgcgacccctctaGtgctaTctcCGCTCTAGTTgTGGAgccCgGcCATCGgcCTTAAcGAGTCGgtcTcggtctgCcgtGCTTCCCggGTgTggCCgcTtTTAtgTtggcCgAtcgaAccacGtATGggccTCCtcGAGCCGtcgaGTCTTGgAATGCGAATCAATATcTAGCcTAGGGCTGcggctccatCccactataCTCggatggcTTgggTctcactGtcaGtTGcagagacccgGggGCACagAAGCGACTCCCGgGgGATGTTTAGTAcgGggcAAGTATGcATCGaAcgCctgagCtccgAACTATAACATTCGtGCTAGTCcgctgGgagactGATagcgccccatcaacgaggcctCaagAtCGAgttTtccTaTgtacGtggTgtttagttatCgCgctAgccccacaatagGagcctcataccgGggctgGGcAccccCTgtgcGccGctccgcgtTcaCcctGCcggCCGttctaccgcctcTtCaccactgaTtAgCcaTCcaGggaacgaaaatggcctcgtaCggcaGTATtGCAgATTTAGGCGtAAAGCCTCTTccTCAGgcACACgcGGcTTTTCTgCATCAccCAaTCCTCaACGCACgTcGCcAAAGAAGCgCGgGCAAAGTGGTTcCGgCCCtggccgagTgacAcatgtAAtCgcaccgCCTGCcGCACgTgaCAcgcgagAcATactcgGCTgTCGAgAGcGCcTGTTGcgGcggggctgcGgcCTctcgCCcgcggCagccCAcgcCTGtTgcgGcgatctacgaATAtTTgggttgaCcgaATGccaaaCcgtggggtagaagtgtcaatagaagcacaccgtccccccatcgcaggggggttcacgATcctctagCcagCatcaTaaCgGGtctgCgcCatggcTAACcCcTgcccgtggagtctcTTTCAgGAGCgtcATgaTTCAATCCcccGCCATCAcCctGtTAcCaatcTTaCgaATTgaccgtttagCgTgTggTAaGcAATATGcGgTAcGcCGCGTTGAcCGATgCACTTCTaGAaCcGgGTgaggcgGGTGCATCCCCCCTTATTGATATCGAGCCtCCCAaTTACGACGTtTTAGgcAACAATcAGGCACTGGTCTAGAaGTTgCCcCCAtTgGGTcGCCAAgAcAGAcTAGGTgCTcCAGGcGTccAGccCgtgCgAGcgcCTCTtcctgGcgcctatcTcagccTcgTcgTTTcggcGcGTTgggccacgttagctcccatcgGGcggccGtgaTacTgcgtAAcatggcctgatCgGGttacGcgtgggTTgagAcCGcGgcgCcgCgGgctcgtacccccccCGTCCGCCCGacGTTAgCCAGCGTATcACGgGTGgTTGCGGtcgcgctaAcgcagggtgcaggcagGtgagacgtagAccgGtTTcTACGAGacgAAATcGCCGGgCcTGgATCgGTCGAgTTCGGaccGCCaCAGctTTcGcTACcCTGCgTACAATtAGAGTTCTAggGCCcGAgACgAATGCTCGATTATCGgGTcACCAgGTAcACAgGGctaGCACACGctATGcggctgagtcCaTgTCGaaCTgATCaGgTcCgggcACGAgcATTTCGCGcCGCagGCAGCATACgggGccCagcccgcgCttGAAGgTgGCTGTCCccCtcTcTcTTACAATCCAtGGGCCgAATGTCAGAGCgTACcccGATTAcgTCCcTgGAgGAAAcTcACGTagAGAgaGggTgtCcAAgCgCGCCGcgTcTCgGCccATAgAtGAATAcgAGAAggccgGGCATCcAcAACCGTGTCACCTTTGATCTATgAAcAgCCTACGTCGTtcAcGGGcGGAATAGGTTAaAccAACAACTTTAaACCgGgcATCcTGcactggccCGGGctaAcgtgctgccgtctgcgtACcggAataGacGgGtTAGGGACCCGAGTAGATTAATTATAGCgtCccAcgaggtccgctaaacgggccGtAatAAAAGAACAGCAttcggAgcgcCggcTAGAGTGTCGTTCGTGCgTTTTCGGAAAGATCGATGgTCGTCAATcCTTAcAAcCAATCGAGGATAAGTTAAGCCGgATTACACTCgTAGcCGTggCCagagcgtcGAAGAtCcTgacggtGccAgcGCcgtagCGTTCCACGgGGAGAcTTagaGcaGAGTTcGCctaaCcggcgCCccAAgtCTacTtgcgtaCCCCTTCcTATGcAAaTGCTctggCTGTTGgCcagagctaGTcGgtagcGtTGTcgtgGGCGTccggggGACCGCaGcccATAACCGCGCgCCGCTAGGgttagcGcagcCCcgGgTcCaACAgCCTCGGTGAGCgTAccTTGGGGCCtCgCTAgGAgGCCATGTCAGGCTAtTaatgggTGTCgcTATCGAATggGcATtccgCTCAAcTACAaACgGGTCcGCGCtCGAAGGgAcTTCGTCTTATCTCCTTAgtagaATccacgGgTGGGTGAGATCAGAGCTACGCCGAGCGGGACggAGATAgAggGGGATGTGcGGCGaATGGAAcAGCGTGGTGGTCAGGTCCGCTAATGCCAATTCAGGATAGCCGaGaAACAATgGAAAGAATCcGATAcCGTCGACTGGGGCcgACccAAGGTaGtTcCCTgGCTACATCAAgATgctCAAGTgGGtaGGtgtCCGAggcaTtcaTAaCTCgGGTCgcAcGAGGGtcgaagAgcacCTTTccacgGcCcAcCAAatgcCgGTCAtCTGACGTGGTAAaATTgcATGcTCGgccCgGgGAgaCgCCcAcTGATcCCCtctGACACGTCaGGtggaGGTAGaCCGgTCATgtGGTGCGcccagcgccCTTAAACGAAGATtcGtCctCATTCAGcCccaATCTCGGCCgggAgccTGCaCatccTAGGCTAgCtgGTTACAAGCAGCGGCTTGCCAGGGTGGAAAcGgGGCCgcaaCTTTCCCGGGAA
>Xvv895
TATCCCAcaggCCCGcgCCCaAcCGACgATGCGGgtgtaacaggcctgacaccctCggAGgGtCcaacTcGcaccAgcCAGGggTagGAggTACCCTtAtgGgGgaATcgCccgtgCcGCAcTACTCGACTATAcggAaGATAggtgTcAcTcAtgGACcCacagACGCCATTTCTacGGtcTggaGTcAGGggCcTCCCTGTTGTgCGAGCaaagCgcgtaGcGatgtagtccacccCgCccgtgcCGCgAcgcgaTTcccTTTATTtTgaCAcCTGCCAAccaacgaCGccAGtCGAccaaaACAgTATGAGTAGAAAcctTTctATAGAGAGACCgcggcgTACTCcagaggggTCgaGATGAGAAtAAgCTGTaATTggcGcGTGTcggActACggtcgggcCGGccgtcccTACAAcCctTAgcgctacaTggggagtacgccccgcCcgccgcCcccggGatTaccgcGagccaaatcggcgcggagtgacattgggAaGcccgaggcagccagagcttgtgaccggggcgAAcTAGGcgGgAaGCCTCTAAAGGTATAACCTCGcTGGTGGgAGCATAAAGTGcTACTCCTGGAGATTATCGGcCTGTTTgCGTTTGTATTCCCGCAAGCCCGCgTACCAGGCTACCCTATTcAGggtgcgcgcgCTCAAGcCAcCAccgCGTGTTAACTcGGAGgaTagtTgATagtGAagTTGTAcGTGgAGCCCTGCGTCTCGGtTAATATgTAAtGATCTATGGAGAATTcCcGCAAAcCGCTTCagTCTCCTttGGTcTAAGGTCGGAAGcggtgagctgGgcgtctggaccgctcggaCaTCccAgtctctggGgATCGccGGgATCCgTTGTAtgcTTTACgAgGAGTTCTACgTGcgGTAGGcACcTTgCcAGcTaGGTAGCTATATCTGTgTACCGGAgTGAGGATcTTCTATcACTcACTATCAcGGAAAAATGGCTTCCtCACcCcGCGTccGcCGagcacgGgcAcgAagccCgacaaaaacaactaggccCTagacgcatccgaccggCactcttgGgagtgcccccTccCcgcTtggCcgccCcCgcCcTccccgctagcgccCTcgCaTATCCagTTCCACcAgttcgcgcgccCcgaaaGgGAGgCAtTccgcgtcGcCgtgAgtgaCaaattacgttActtgCtcGtcgGtaGCGTgtCAATCtCAgCaCATaGgTAcctaCcCTcTgaCTCTGaATATGCCATTCCCCGACTTGGGGGGCTcTGGCCTTCTTAACGGGTTCTTTGTGCTTAATGTATTTCTGTTCCgCAAAGACATCTGTACactcgacccctgACgtGcgAagccgacGgttgGCcAGCggccGTTAaCctACCCGTTAGCCGGTGTACTTCGCCGGCgAAGCCTAGGAAccACAcacGTaaTGaaGGGAAACTGgcCTGATgACCAaggAAAAACTCTGAGTGGGGGCAATATCTAACATCGgtgggAtCCAGgAgtAGgaCTGAAGCTCTATTcAATcCgCCctaAcGccTcTgtCcacccAAggTCAAcCAAcgaccGtgtgcccAaCccggGaAgGGaTtcTCtacCcTtAccgCtTggaACagttcGTAcACCGTgcAAcCTcCgggTGCgcATtcACcaggccatGggaccgTTCTccTgGGTCCAACATTATTCTTAGTCCGCgAGCGTTTggcaCatggGcagcTACTaatTAcCCCGaAaTCcGTTGAAAaAgcGcgcggtTTATcGGTcCggccGtgAaagTccaccgcagcCactcttGAATTCGGcGgCCACAACCCGAAGCCTCGAAACTTACATgGACCACCCACAACCGGgCGCGGcCGGGTCCCTTgGcttggAtCctATAGCcgCagcccATgtggGgctgcgcccTCATCcAACAGAagtccgCtAATCgtcccAAATGTcTTccACgGCtaGcgcaggGCGGaacCtAcCCTAGgTAGGcaCGTCacCCACCTATCccactcTgccgAcacAAggaaAgACACCCgacTcaacgaagatggaCCtatgtcgtgttTcacGcCCTAATCgAGaTACCTCACcgggcccgccAgagCatGACCTATCTGGaAAGCCGgGGTCGTTCGGcGTGTCAGCCGGTGCCGCCCATCAGCCTTTTGGACTAcACATAGGGGTGCAACTCAGTAGAGAACGAGGATCTATGGGCGGGCTTAATCggcccgaggttgaAccCAgggaGaaggcacgGgCTCacCgcATGGACGGAGTCCTCGaTGTCTTGgTCTAGCTAAATGTtcAgACgCTcccTAATATAACGCCCcTTAAGAGCCTCCTATTTTTTTCCTAATTGTCGTGGCCTTTTATGTTGACGCCCACGCCTTCATTGACTGCAAGTttCACccGcCgTgggAgcaGTACaTGGAGTTGACTAgAAGAGCCGGctCTagacatacccCcgtggccgcgtcCTgATGcAcATcgacACGCCcACAAAAgccaTtccgaCcgcATTGGGCACCCATTTATTAATAATCGGGCGCTATAGGGCGACAACctACgCCAGTCCATcTGTcGGCATgGgGgGTAgGcaGCcTCTTTcGAgAGCCGTGCCGAATTAGTTCCGGACCGTAATTTGATCcgaCCggcACTGccGTAGCGGTGCAAATgCATCTCGAAtCgTAGTATTAGAggAtgcTATTAAcTccGacAgaagtGgcaAggcgcgCgcggggttcacGgagcggttggTtggccgctttggcgtacccccgcGAgtcTaTTGtCtagACcgAtcgccAcccgctacAgggGcggTgcaTcTCgCgccCttcctcTcgcGCcAaaTCatgCtgcAGGATCGGcGACcCCTCGCgTCtcGCTcccGGGATCCGGTgACCAAATGTGggTCTTCGAGACATATCCCTCTAGAAGATACAGCcTTCCGCAGGTCTGCCGgCGCcGGGCCtATccaacgcGATAgTAcgcctactGacAgACCAgAccCCGCGcgTctCTCCcAGTACgTTACAgTGGGTCTAACAgcAATGtTCTCTAGtGCTCcAACCACTACcATcGCgGTgCggaccggccgcctacgcggTtgtttaTCgGAAtAgcgggccccTcaaCgTatgAAcgcagctggcgccgAccggGgTgacGAaACCATCgcgaTTAgtcCCACAGGGTCgACGAtCAGAGGAGGCTGGCCACTGCGGCTTGgGATATACGGCACGGGTGGAACTGGTTATCTCACGAAGGCTCCATGAATCCGATgcAATCGATCCACGATccATGGTccttagACCAgagAAAATCGAcGGTTTAtGACAGAgCtCGAGGcAcGGGACcggAATcTTTGGTAgTCTGATGGTTCTGAGCGCGTTCCGGgCGTGGATCGTCGGTTTTAGTTGTTCCGTTGCTGCTCTGCGAGGTCTGcGTCCACACATGCGGCTCGgcAGaatctGAaccgggCtgGccCCTcTTAAGTCAGCGTCCCTACGTCTTATAGCATACTTATTGTCGGGCTCTCGAGgCGCCCCTGTCATGTTTTCGAATCTATTGCGATTATCCAGACGGCGCCgCTCTTACGACGTTTCACTTCGTCATCACgccTTcccATATgTCcCCGGTAAAacgAgaaAcgAGCACTACTTTtgCACTAAGGTCAggcCTGGCTcACCAcATGAggTCgtcgaGctgCggtttGCACacAGctctgatggTcgcCTTTACtaTAGAaCgTCCcggccggAGGCTgCCtccGgGaCGGGcTcCCGAAttacgTGgTttgCacccACtTAACTcGCTCGCGcCGATggATAcCGGCTCTGAGCCCGcTTAGGCATAAGGTCCcGgGATTcCTGGaTgcTcTTTGGCGTacgaaCTAATTtATATGGGATAAGTCCCGTCAGCGCGTTACtGtgaGagtgTaggcctggccgtgTtcgtTccgcccAAgcccctgcTCATgAaGTAcCAGgTcaaGgCccGAACATTAGCgAtgCtcctCATcccaaggtgCTCCggcgctccATTctgccggTtACggcaccgggggaccgcagaagccgcgtgAGacgggGttGgctcACCTcaaTCCAGTGAgCGgCTTgcccGGTACATTCTgAGggAAgACCCGTTcCTTATGcCgcCGcTgAGtGTCCGGGAGCGGCGAACCTAGGCGGGGCTAAAGTGCAGAGGGCCGGGCGCGGCACCCCCAGGGGCAGAGTCCCCcTGGGGAGGGtTAGGTcGACATgAgAgTCGcTCgacGggAccactgtcCccccgcacccgATTCGggccgaTggggCcgAAgCTTGGgTaaagccgGGtgTgcgAacTccgggcaccAggggggaacgcGcAAcCGGcGgacggcccggctCtcttGcgccGaCtTgaTAgGttTaaAgccgGatgGgcctggtcAgaTccagGtggtaaCAAGgGgaAAAgggGCGGTgAAGCAgcCTAGGccctgTcggcttaggaagtgAaGgAaaAgacTgcgTcggcAcgtCcATACctacgcCGTtTGTCTCTGAGCTTACTGATGGCAATTcagcgCTatgaACagTgccgCTAggGGGAAcGaAcGCGGGAcTATTGggAtCCAgcctTcTCGCGTcAAgcGCCCACTTATGcACTTGGgTACTTcTtGTTTgGCtcGAtgAGGCTcGATGGTGCAtGgTTtGcCCTctcgagGgaggtcGCTccggGTtgcAgGggtcgGatcgtcGtGTAccgcgaTGGcTTccCcaacAgcGTTCaGtcCcaagatAcCAaggcattgAccTAgGAGccgggTAGacCTcctggaggcCGTCcCACcAAcTCcCCAcggCCgAAAccTgGTAcgtTGGGTGTTATAGGgaATGTATAgTAggcgcctGAcgccCcgaggagAgtGAGAggccTttgggaGtcggcAccTTccaccagcAccttagAAtaggGcAcgTcgcggcctgtccctCcgcgttccccagCgcttcccGCTTAGTGAGACCACCcAAAAATGCCCCTCAGcgtGAccAGTgGaagCgcggcaccgAcattgggCTccaatTCcgcAacagctctgcgggtagCGctccaccctaCcAcagccaatACGCCTAAtcaAGgCgAcGatcgtgcgctgcgggcccctggctgcAgTtCaCcgTcAgagggAtaccAcccAACAcgAGTTCTGGTTGGTaGGGGtacAtCgGAATAAGATcATgAaggccGgccggggCgtctggccAgGggtTTGGGgAGCAATACGTGgTCGCGTGCAggtcccgCCtcccGGGCCcCCGACTGCCAAGgCGCGgTACggtAgcccTCAgTCatgggCcaGctcAgAAgCtGTcCTTAgcCGTggacgGtcAAcCcgcTccGAaCgtCcTAgGgAGcTATGAATcTGctaCcgTgGctagggcctgaaGccgggcgccgccgcgaTcccCagcaAaaccccccagagcatcaacggccCcggttacCgctggAgacgGgGtCcacccaTgCAGGAacTgCcAcAcGgTtGACGCCCTGtGagctgGTGaAcctcgtgccccggccccATtcTcAACTCTACGCTgataATgcgctgaGtgGATGCaGTCCgGTATgTGgTGtcaCgcGcAtgacgGccgcgCgAAtCGTTTTCCgATTATgGTGTGCCTCACCGTACaGTCtTACCaTAGTGCcgtgCgCcgATACgTAgCcGgcAagagTgCgGgagcACCgGCCCGAAGTGATATTgAAAAgGAgCGCAGggATCGGGtAAGGCTGGGGCTCCGCCTGAGACAGGCAAGCGGTTAGAGCATGTGGAAATTTATGaAATGcaccGagagGGAGCcCTCAcgTATActtggccacCataaTgcatgcggcGGcCGgaccccttGcTTtCggaacacCCgggggggggaggctggcgtcagttccAGaccCCgAAAgAcCtGActCgGcAAGcgggggcTTAgAcCTTctgtcgaAgacgTgTcCGACGCcAgcAgcgacgcCCACAACATTTGAGCGGGCATAGCgGTTGGGATAGGgTaCGCACGCcaCGcACCACATCtggTaCCcgaGTcCGGAcGtAGagGcGccGCTCTATtcagGGGACtCTAAAtTgcAATagATcCcCGgtaccCCTgcTcCATtCgGtgcccccGCTTgAgcTcAACGcatTgcTActcTCcAgccggacagCAACcAcTacatactAaggagcAcGTTAgggCGACTGcTCCACTTTAGCTACACgcTtTGAGCcCAgAAAGcCttgAGGAgccgGGAGcGCgGtCaCTGTTAGGGGAAGTTTTTGTAGGTACGTTAGGATCTTTACCTGTTACTACTCCAACAccgAAccGCTCgCgCTGGTCTgTcGcggTcCTGcCCGCGAtGGAgcGgTcgTGATAGGTACggcTcggGCccgGccTAGCCCgcCTCAGCTggggcttGgGTCTAgcCCaTTcTcagcgCgGAcCCGTTACCTTTAGCTTACATcACGgCTTATTtTGcgcgTgccccgAccTctAccCActccggggGaatttTgggCaATATTCaAGGTCCTGGaACATATTTTagTAtCCAACTAcCCGGgACGgAcCCCcCttGtCagCtccCTTAgCTcAcCgCCCCTCTGAGTAAAAATCGGaAtTcCCgTCcTTgAAAATGTAGCTAGTGCGtTcagGCTtGATGgGCTGTAcAGCCCAGGTGCTGAAGGTGTGGgAcACTCGCAGgctGGagCGggcTTatCcgtcgtgttcaggcAcgcTCTagtcgaCcgTGCccccgAcgcaagggGaacctaatgtcgggtgccctgCcTCGctgacacggcTAGTcTGtcaggcaccCGAtcaCaTTATCgcGaGacAATcTTAcTTTCacGCTGACCGTCAGAATAGggTGAcTCCTTAcCCccCTgAtCTtCTggGTTCACTGGTGTAGCTcCAGTTAgccACggAATaaTGTgCcGgGgtgcccCCgtcgTGCCAcACcTctcGAcAtagtCTCgAACtACCACgaGcaCGCCTTGAgccTcCatgcggaGggGGgCCCGgcgCagaccaagtaGgcTtgAcgcCgCCacccaGCGCTTCCGTccGgaTATAAgtAtCTTGGgtcgagacttcaccaatggtcatcgCctgTCctcgGaAattgaTCaGgggccgaacagcGgaGcgcTatatgtaacCcgTtagCAGcggtgcATgctgcGgaggTcaCTCggcgACAGgTGGtgtcccAAtgCAcccctcCcGtgcaTAgATAcGcAacgtCGctaTaAGgcacagGCgCtGgTagTacagactccacgtgtcccgcgTCGGATGTTCTTcTTAAGCAcggcgTgatgacagcTgtAgCGCAgtGCGAAGaTCcgCgtTAGagTcGTgTTCtcTTGTAGGGCTAcctgggCgcggcaCtCtCACacTCCTTgCcacgTCAAATGACCAAATcAcTGCAaCAcACaCCGCTCCCAAGAATGCACATATgCcAGCTAAGCTCCggTcggGGatggcgctcggtccgccATcaAtgGTGCACTTTACTGTGAGcGGAGACGGTACAAATCGAATGGAAAATAACCTTCTGTTCCATCGAAATTTGATGAGAAAGATCATTTTCTCGTTcCTAGTCGCCTCCACCTCTGACCCCATACCCTTTCgCCGCTGCTAGGAAGGGGCTTTACTGTATCCTGGGgGaTCgCGTTGATTTCTAGGAGTtgcGgGAcGcgTgACCTCTTAGAGAGAAGAAGCcactTccCgggTAATATGGcCcacgctCcgcaggtCgGcttACgtAATTTAAGTCGCtGGAggcaagccaaccgatgAcggtTgggCtGgccGtcgcaTcCTgggcgcccaaagcccgGAcggccgccccagCgaactgTcctTCcccccggaaAcgcccagtgcgcgaaTcggCAgcggggagcaCgctcTTTgAgTccCgcGgcgCCGATCGTCTAGACCGGTGGGCAGATCGGGcAGGCATCGAGTGCAATTCCAACATAGAAAGATGAgTCTATTCTATCGgAATGCGCAGCCGGTATTTCTTTATAATCTAAGGCTCGAGACTATGGTGTTTTGATGTGGGCGTTAAACGTGCCAAAAAGAAAGCCCcAGCTGCTCGGGTTCCTGTACTCCTGGATGTgcAGcgTGGGATGgTTTAggAACGTCTTcCTCTACAGcAACTGGACCCtTACGGtgtttggTctctAGCAaGAGCGGTAcCccACAccggTgtcgtcaGaTtATCTGccCTTCGAATGgtGgaAtcCCtgcGgGgccCATCGcagcGGcGATATAGTCCCgTcGAAcgCCTCCATgctTtgcCCCgGACtctaGgtcgcCGggcacCgagggaGgtAcggcgacccgCgTcgCttTAtttggggaCcACgCgTCGATGgcAtCcccgcatgtGgatggagaggGGCcgaGggTcatCgCATCcGgcTtaacCccCTCgCcccatgtaggggtacacgggaccgcgcgcagaaagtatagttttgtacgcccgccttgtCAagcaacaTaaggcgagaaaggacacgcAacccgaccccgCggcACtCgtcgAtcagatAcTggGAgccGGTTCCTACCTCAGCGATAGAGaATACACGTTGTAgCCTGCCTCCGGTTATAGAATTCCGGTCCCCGTTCATGTTGGTTCTTCGCTGGGAGCTTCTGGCaTAGTgcCcGCagGGAGCtTACGCGcTGTCCGCCTGTCTGGGGTGGAAAGTGAGCGATAcATATATAgatccaaTgacccAGGAGAgGggaagcacGccggTagccggtaTaccaccTcaCTgTTAGAGACTGCCGGAGAGCGCTGTcaaatcgcCtgCGAATTATAGGTGaCcgtcgtgggggaaTCaGtcgAgGCCtaTAACaaAacTTccaACcCccgggtgcCgCAGGTcGGcgaGgggggAACTACCCGcgcGGAGggggatgcCaGcggtgacTagcgagagagCggGtcAcggggacttctcggtcgaagCtACAccttccAcTcGcAtTGGGGGCATGCCAAGcCCcGTcgGgtACtTgtCAgACTcTcCccTAGacATggcAtcAGTCGGcAGCAGggAGTAcTCGcGTTgttTgctgcgAACtaGTTGAgagaCgACcCcacTGggtATAgGAtGAagccGCcATCTGcccgGgTcgtgcGAGGCCggGAAATaCCTCCCATaaAtgcggTggAttAAGTcCggGgtTacgcgcggagCGcgCcAcCGACggttgtcccaTtGgAAAGTAAcAtCACActgggcAAacgTcGtcATtCgGGgTCcTACggtGgacaGtGcGcCggATcaCcgctctGAGgGGCGAgcGTtaCgGAGgGCCAccgGGCTATGCCaCcgttGCagTcTCaaGGTaAcCGACTaGcGctgctAcgcTcgtgggtgAGCCCAacATccGGCccGgATAGTACGTCTCTAAcgCTacgCGTCatCActTCGGTaCcgcgctgtgctcAacagggtcgcAcggcCccGgcgcaggGgCCcaatGtCagacaGtTtGcgcccgacaacctttagATGATTTTcCGGTAATCCAGAAACCAGAGCgACcCGTTgTaTcaGCaTttagGccCCAGTTCacgCtgtcATCGggCgAaCCTGCAgGAGCTCcTcaTATGATAAAGCgGGGAATCCcGTGTACTTTAAACTCTgCGATCTGTAGGTTCCGCATcCACGTCAACGCCCGTGTTGTcATACTCcTTTAGCATAATGATGTTCCAGTAAAGTCGgcTTCCGcGTTATGcTgTAAgGAATGTTGTTCCGCCTCATTATTTCgaACACATTCTcTcGCCGctgCAtaccgGaATCATcGAGGTaGTAAAGGTTCCTTCATgccTTACcGCGAcCAATAgCCAATcTTcGccCcTTTGTTCgggAACTATcAACTGGAGTGGCCACGTTTGACGAGTTAAccCgtTTAGTGTCcGTGTAgTAcTGcCCAcTACTGcTCcCCACcGACcTTTACGCCCATGGGGGATcgAcTCGGCgGGGAGCCTCgCCGgGgCgTGtcatatttgCGCTacccacGAATGgGcctccgtCTccacgggacgcgCggCtTCGgCCgggaCcggtCATaCcTgggTGcGcttctCaaacgcaccgtagccggcTCgTgTCTGACGgcGCTggAgcggtcgccagtcgctCCtccccgggggcggCcAATgggTGggtatggtaaacGctaCGACTTTCtGagggGGcGgGCtGgAGGtgTAgcatatTagcccaggAACatgggcgccCgtCCGGTTCTGCCGCGCTGAGccgaGtAGATCCTAgGCGCGATGGGAAGCGGGGTGCGACTATAATAGGGTCACGTcAcTATATTACGTgaCTCTAccTCTGCgAActCACACaTgGAgaCgGttgCccTACAGTcaAATTATgATgcAGCTCCtGAccTCATCcCGCTTCTAGATTACTTCACGCgTGGTTACTTAAAGTTCCAcCAgCAACAGTCCtGTTTCCGTTCGCGTAAGGACTGCCTCTCCcCGATCCCGgggaTGAGCCTCgTGAgAttTgagccgAGTcgcATCgTGGATGCgATTAAcctCTCAgCAAcTtcagcccccccTGACAACCCTgTCAgcCCccGTGGgcCaaTccggccATAagaacgCGGCcTCTATTATCCCTTACTCTTCCGCGTAAGGACGATGAaAATATAGCgGGtAGTAGCACAgGCTCATAGgggGTATcGATGTccgacttTaaacgcGCgacgCtAccgccccGcTacTTAtgGccaaacTtgcacgaATTTACaTAgctGaactctcacATCCTCACGtggtCCCtTTGTGACGCGCATGCTTAGGGTCgcttgTaGtATtgGCTccCCTTTACCTaGgAccTTCTGCtCgATCCgCCGAGcTTAAGGAGTggTGGGGCTGTTAATGTCATGCACTAGATACAcAGGGCAATGACCCAGACCCTGTGCGCATCAATAGCAACTCCATACGGAAAACcgcaCTAgTTTTCgtcAGaCTCATCATGGTTgTccGcGCGTgcCGGATTcggCcgcgcgAcgGgccgagtctaattcAagcggcgggCtggcgttaTggGcgggcgtcgccatGccCtTTCgTAgGggAGCGgAGAGTAccgAgCCGcCCCcCGCAcAgTAAggCTTaagAcGAGGAgATGGTCGACCGGTCACCTATACTGTtACCGCCTCGGGATCTTGTTTGCTGAACcTGaTCCgGttTTCcggatcctcTGAcgCacATAcggAGAAAgGacgcgGTcgaCTGTACccAccGCTTCgCTgggtcgcgCctaGAgGTAAAGGGCGGACAaATGAAACGCCgGGgaatTCcGaACgTggtaacACCTgcCCGCcgCgttCatTCGgTGGGTGTtATCATTTTcCTCcGACGCTTTCGTGGcTCATGTCAGTagTAGAAtTGcATcAGcCCCgaAcCGCCGgTtcacAgTgAcTctgacgGcAagCcaatCAggggtCCtcggcgaTGGCCAGCGGCTCCGGCCtgggTAgccTaCGCccCgaactctGagcgTaacgcacGcctcaacgccagggtgagggGGaCgaccGgGAcCGTCGATGTAAgTagAgtgcccATTgTAgTCTCCGTAGACCgATACAGCTCGGGTGCCCCCGCACGACCCGgAggTCgATATCGgAcGTCTTGAGCAAaGCcGGTTCCcgCAgAcGTcTgACgaTgCctCACAATCCCAGGGTGGTcGAATcGccCGCCTCGccTATGcggcGccgccGgtcaGagtcctTCgAgggTgtaggTcgcCGaattCCCCCGACGTcTcgAcaggCGAGAGCCTCccacTctGaGgagActTtcgcTcgcGCGtgcccgcagggagGcGAAATCAGGCCGCTCAGCTACAACCCAATGGGgggCGTCTGcTGCGAgagggcctTAAAATATgAGCtgagcggTGgatAGAGAGGTATGAaCtAGtATgATAGTgTggcTagaaagggcgcTGaggAgacgctgTAcgtTGTcTccgaaGGAGCGCTGAAAGCACgACAGATAACGCTGTTAAGCTACCAtggtGccCtgTActtgATTcaAccggcCATAgcAggTaTggcTacCGGgACGGgTgTCTtaAagacgtaccctgcgatcccctcctccggtttcGcccGCcccGtTacgcgatctAcAtcctgtctgcgccggcgcggggagAggtgCGtcaccggagaTccatggttcccccAcCAtctAatggctatcgcaacgtcaaagtggcacCgctaatgaAtagggCccgaggccccggcgCCTTaGgTATgcCACCaCCACCCATTCgCCggTCtGTTTCgCAcTaggGccAGTaCaCgCAAAgGTACCTCcCTTTCACGAGCGTGTCTTgAGAgACgGTAGAgTTCCcacTgGGgTGAATTcAACTTAAGcGCCCCAGGAGGGAGTGTGAAAGAGTCTTATGTGCCGAAAGACAGAAATCAACCCcAGGGCAGgGACCTCGAATGGAGAAggccGGcccaaggggcgCgcgtttCcTgtaacTtaCGggcccgctacctAAaTTAAACggaAcgAcgcggcAgTGcTGCGcgtcTgggGTAcgAaAagggagaGCgcgGccgtagTTgttACccTTcACcGGATGCTGTTgGCGcAaacgTcccAggagagccgggttggacgcgttccccgtagcggcAGcCcTcCGAATGgcccCCtTGACggcggTGcAcaaTACctcAATcTCcAGTcGAACGCCTCTACCTGAccggAcccctgccgGggtTAAGTACCCCtctCTgaCACCCGcGtCGGCgCtcAGAGgcAAggTgTGGggcAgcgAatccctcGctcgcACCaAcGggTcCaAcccGgtCGGcgggtgggggtgggttatctgcgcggtgCcCAGccCGTcaggcgcCAcAcgttaacgaacgggaggaccagcgcggaatcgtTgtttccgagcccgcGcgcAcagggaCtgaccAgcacCAGACggggGcgctggcgctTGttcggTcgatCGTATCcATcgTCCaAAtcTTtgGCGCTCGcGagtgCGgCatgAcGcgccccggggggaggGAcgTtggTtctccgaAgcGTTCttgccgTcgAataggggaGggaagacTcccGgagaatGaAtcGTTATGTATGGCTAAAAAAACTATATAGCGTTGACATcGgCTGcTTAGGTGAAGCCAATGTgACGaTCGGaggtGccgtggggaggggtcgggggGGgagCccgatAcacAAAGTAaccgTCtgagACtAgGTTCCgCgaggttgGTCTCCTgTTTAGGcTGgAaGAAAGCAGAATTCccagCAcAATaTCTGagcAGTCATAACCACAtgcgcCCATCGGGCCAcTTCggAGCTccGgCcGgtCcgccttAagttatcGAtcccctttcgcgGtctcatAcggGgAAGGGCCcACTCGGAATTACGTcTaTActactATCcAATTGGtAACTCCCtGAAGCTGtGGCGAgTTcTAggcAAAgGggAGCGCGAGGGAATtTGCATTgGTGGcGTccAGCGCAcCcatTATGGTTtAgcgccTCCCcGTCCAAGGGCgggatAgTcATGCGcCtaTTCGTgTAtggcCCcCgGAACGTCtAAGgcGGaCgCAGTGTTCagtATAAAAAACTAATTcCGGATTcTGGTGTcgAaAtttcgggcgAtgAGggttcgTgtTagGAgggaaacgcaccGCACCGAACTtGTTcAggTccgTCCtcAGgGCGGAccAcCggTTGGgGTCgGCGGctcGTTcCgCaGcgcaacccctggCtatctaCtcacggtgtgGccTACgTGTGTcTAcGGCcCGtGacccgCCaaCgcCgAGgTTTACACGTAACGCAAATTAACCCGTAAGAgAGCGggTCtcCGGTGGGATGATGCCGTTACCGAAATATTAGAATTTCGTTAGTTAATAGTctcccgccCGTGCcGAGATgAAagTggCTCTAGCTTTTCTTCTAGTAGGTggcgcTGGTGAgATGgtcCAcGGTTAGTTCAGAgcGGggcCCACCACCATGAcgcGgCTgGTTGTcAGAGGAaaGggGAACTGCGCACCGTCCTcTTTGGCAACTGATATCATTAACAGCAAAAGTCTCACCTGCTATGGATTGGCGTCAgGGTCGATAGCCGTTTtAGGCgCGagTcCgCtAtCtccTCCcCTcTGACACCAACATAATtTGTTCTCTagAgTTTACCGtCtgcTCTGAcTGacCCtTGcCaaCTTCGCTCCTccGCCCgGCTtgAGATcCTACCTTCGCGCTTCTACCGGCAAAtCTaGActcGAGAAGCGAGCATggcgcgtttaTgCaaaacacAtcgCAAGTaTCgCgtcGcGgTTTTGCGTACatCgCCCACcgCCgaAGCtGcgGgTACCgcggAtTCGATCAAGAATAGATcGCGCAAaTCgGGTTacagtGATAGCAtCAATGgAgGGTCAGTaAcAGACAaCCTCCGccCaccgaCCgcCcGgcGAGTTCggGACTAATCcAATTATGGGGTTATGTGGTTGATCCGGATTcCTAGTTGTcaCCGCCTACTCATGAGTTAAGTgACCCccGcgcAtGggCCcTACAGGGctccGcCCCTgctGAacgCaaaCCACGgAGTTCCCTCAAgaGggACTCCAAAgAGCCATTTGAGtAGGTAcCTACGCgGtgtAGGcCGCCccgcggCAACTCTACTGaActctCcgTACCTACcGTTCTCTTCCTGTGCCGTGTcCtggGccttcgagagtccCAGTCgtTGTAGAcATTATcgCGTcAAGGcgCcccTacctTaAGggGgcGTGAtGCGAAATAacgggTtggcCTGcGccATGGCTACCGgtcTtggATGAGCATTGaagggtCCGCAGAGACCTCTCAAGAATGACTAACCAatcTTgtAgTtgTgTgtacgaTCTtctCAAGTTTCATaaaAAcacGtCGCTacaAGAgTGCGAgCATCCcACCACCGGcGACGTTTCTCcCTTTCCTCGccACACTTTCACCGCCTATtGGCCTCATTTCCGCActCATGATCCCgGGGTgcTCCTGAgcaAgCAgTCTGGTCATACCACGAGAAAtcTAGTTgCTTGTACGTTTGCCaCATTCAGACCCAAGACTTTcGGgGTTTGCCcggtcGCggaaAAGGAGGGcACCCcCTCGtGGGGGGCagggcggatcgctGgCTGccTAagCATTCAATATTAgAAcAtagCggcgCgCGccgaGtgggtcgatgagCAGgTGAAccTTTCTtcTGgcgcCtCggaggccACACctcatagCTGggcTaccGCTGATtcCTgtgTaccccctgtctcCcttCCcGtccTCgAtacagAcgTGcttgggctcgCcgGagcagtaccAgCTAACatgggcAGTTtAaAGgCgaacgTTCTTTCGTCAccgTCTGCCGCGcGCCGTGGTGGGccgcaCCttAGACCTAAAGGTTGAAGcacgatgagtgaggacctgcaggtataAtTCgCcagCTAAACTAacCTgcggaTggcgTcattACAgACACTcCgGCCcCATcgAgCgAtggcccagcgtgcGctgGcccATTAAGGcCTcAGTcgTGAGGgtGgagttcggCcCCagccGGcGGCcTGCccGcGAtTtgcGCACGCGgGAcCTCGCgTACtGcccggCAggggCAGgcaacgACccaagggcTAACgCTtgGtggAccggcggcgcggcggggTTcacCgAATgAcggctgagacGgtttcgtgActggccaggctgcaAGCccTGCagATGCCcaggAAgAatccccgggcgggagaggccgAACTAGctAGCGCCgggtCcccCatgctgCtgaactatggccgttTctTtAtcTcagggccTagAGCgCcTAgaggtacatgCgcaTcGTgTCTAcTggGATCAACTGggTAGACgCACcgtagggaaGGggcggggaggaAgtCttcgGTAggCgAATcAACgTCTgccacAggggCctAaGcaGATgGTGCaCCgTcCtGAGAgCAcCAGGTTCGCTAATATTCCCgcGCccGaGGAcTaGGgCtCGGTTtccctGCaCcCGGACAAATGGCTTACTCGATGGGTCAAGAATGtCACGATCGgGcCTcGAATGTCCCAATACAtTCGGTCTccACTgCAgCGTGGAAGGAAgCTTGTcCgGGtTGCGCTTtCAcGTTGttgCGTacggGAcCCGCtgCGcgTTcAgaCGtggcgAGACGTAggcGGCGggAgCACTAGTTGGGGagtTGTCACCtGACCTgTcttGTTcaTCccACcgTCaGTCcTTTCCTCTAGCCGCAGGATCACgCGCgTTgTTaCGcCgAGTGGGAgcTcGGGGTCTACCATTAACCAAAcCcGgAGCCACTTTGAGCTCAATTGCTGAATCCCGCAGTTCCACTGCCCGGCTGTTGAGgAACAAAAATAGGCTCCGTGGCGAAACccGGTCTACcGTCCACTATcTTATTcTAccCCCgCgctCCcACgCCTTTAAaccTgtccTggttcttagtgaggcaAGcggGGAGgCCGAGGGCGAGAGATCGAAATGAACGCGaGGCTgAGGGGTGGCACCACaGGTCTAAGATGAcCAGCATGcATACAACTAGAGCGGGTACGTGTCCCCCATGAAAgGAAGTAcACTAATAGACTcCatgcccagTgTACAGTGGCTGTGGCGGCGAACAGAtTtcTCCGAccgcCgCtCGcgGaGTGTtTAGCGataCTccCcaTgAagagttcatgcCAGgcTAAGtcgccCcaacagcaTTtACgaGACcgccgAgcctagccACGcCtgGatcgtggAgccCGCTTACATtGGATTcGAATGCCGAcCcCTCCCCGgTGCTAAGATTGTGacACcgTTCTACgGCCcATGCCTgGTTTTCTCCACCGACTGCTGGAAAAACGCCATATCTTAcCACaGAGGGTTGGTTTGACCCCTATCACCTGTGCGTGGTCACGGTCCCCGAATAATAATCtAgCGtAgGGGCCCAAGcCCATCTACccaTggTgTTTcTgcgatGaCAGCAGcaTGGTaacttATtAcCCAGGGCACCcTTtAcGAgTAAaGCgATGgccCcACAGAcGGGTGGAAAGGCTtTGGGgAGAGTTAATATGgcAAaATcCCcTTTCGcGAATAAaCgCGACTGGagcccgagcggggcgAcTcGgcggCgTGcgccggagcCTtgGCGGCGCGGTcGAcGTGTCgcGgcGTGGgCTATCAcgggcTTAgtAActcctctCATGTTAGCAACACaccAgTGACAGTcAAgcAgGTGAGCGGGGTATCCGaCAAATccGgtCgcgATGTGTgcAACAAgCGGAcTTCGgCACGTGcAACcGgcAGcACGTAAAGGTTtGTGGaccCcttacttCCAaaTtAcggaggTgCagcgGttcaaACAGGCtAAACGAcAcgcTCgcCAGCCCTTGGTCGGCTAGACTaAtcGgTgAAAGCAAccgcGGAAGCgTCGATgGctGcACtgGaacacccCTgtcGTCGTacgtcATgggccgGAGTcgGcActaCGTCTCTaATcAcccCAGAgTCCTCaCCGGTCTCCGTACcgTGATTCcCAgGcgcctaCattgcGcGGGaccCCgCacaccCTggTccgCCGtGTgAgTATgAAcTAtCTATACgcccGTTTGTCGcaAtgccagcttcaggCtTTGTCGGAGGCCGGATGTTTCAGCTCTAgGCGCACGGAGACATGTCTTGCCcacCCgaGCGGccctAattCgcAgTCCGCgtccGGTgcgtccggcTTattccgCgTcgTTgTAAGGTgcgggccACAgAcCTaGGGctgAGcGACAGgCAATCGAGgccgtacTcATcgcgtgcgTaccTgggccgGtcGGTAttcggggcggggACgaGTCGAGAAAtgGaAGgtGctTATTCTCcagTgggTcCcctTGGTGaaTgTccggcgcgccTATCGCGGcGgCAATTgGTTTTATTGcCCGAGTTGgCCaTCGTACTGCCGTACtTCTAACCgCcCAATAGcTGcATcGCCGgTgcgtGgcgatcttaacaccgAcCGGgCTGCATTGGCaTACTCaGgAcTggcctCaAtTggtccgcgggcttTaTtGCGAccgCATCATAGCCAGAATTAtcgCGAgggGGccAtACTTGcgAcGcgCCgGtccTCgctgtctgacgacgaggcaatggcCaacgacTAGGTCTTGTCATcaccTcGGgTCCAAAgTACcgTTGCATTCGAccatgtaacgTCCcctTCTcGctgtcgcagCcgcActGgTGTGgTtccgcGTAATtccccCCgTgggcgGACTtTcCAgAGGgggggccCgaGGGTGtggcTGtaCcgccAGGaTATaGgccAACtTagccGCaAGATatGTtaTcgaacctCTGtacggCAGCCgaTAAAggggcTAcGcGccGGGgcgCTAGgTAAcggtACTAAggcgCAcaCTccAgGttAccGGACCCCGCCAGTCgATTCGTCgATgACAgTaGgTcAcTAGgAgTGgTTAGGTCATTTGGACTaCATAATGTGCGTACGAACTAGCcCCCCTcctcagccgccctcggggtaggggccctcAttgtaTgtgTCAAAaAgaCAGTcTgTGGCTACTCTGgcCGTctTGAtgTgGgGCtTGTAgTATGCGGGgGGGTATgcGGCCccagctAgCGcTcagccaaCgaCccCgTAgcggggaCtctgAcTgtgGAgccggAtgcGGGCCcgCGTTggTTTTGGATGTTGGGCCATTGTGATGTCcaGCCACTGTGTTTTcGCCTTCcGTCGGTaCcCCCTCGTGgTTCTgAcAacagATAtCATACAGAcAgCAAcTCGAAGAAAGccGtGGGgAACgTCActtaacTAgcacgCGAATTGcAgAGTtGcAcATAgGcTTTCTcTTCGTGTagCaagCgGTATGaTtTcATgCCcctccACggaacCTAAcccgcAgAGATCAAAGgAAgTCATgaCAAAAGtACcCAcGAGagCgccatggaggtgcgggacCttgagtcctgacgcgcggctaTTtcctgGtcTgccAgctggtcacgtTCcGgccaggtcaTTCTGTGCTGAAggtAtcctcTagcGggcgcccaTcccggtctTggagggcctcccgGcCggCccgcgctcGgCccgcggtagggtccggTcccccccccttGTccCTccgataaggcacgTtcccaaattccCAAGTcTAtGTgggcatCaCgcatagGcagGgctaTCTtcTcaGTggAACgtgcggggcTCTCTTgATCTGAcagGATTaAAGCGTAGGATGGGCAGCGCCCcGTACCGTATTCCGCGATCGGCGGGTGAATAAGGCGAGGGGTACGGAACGATgAgCgcgTcgccCGTCAGcCGATCAAGACCATGAGATGGcAAAACACGACCTTAgAAGTATATGGCCCACGGTGTTGGAAgCCTTTTAACAATTAGATAcTAGCTTTtggCTAcaAGGCCACGgCTCGTggtAcGCGAggaCGcGATAGACATgTGGCATACGAATCTAgtgCATcGAgCGGcggCGCCAAACGCTcgCACtgaGgcgTgggcgAcccgctccggaAgggagcgCagagagtgaggctaaAacctaTgGaagaTtgccccAgCctagGgACGGAGTcTAtatTcctcgggtccggcgaAgcatgAcgtctgctgcacagCcggggcGcgtgaCcGgactaGcaTCCtTGGgCTCTGCCAcctcggTTGGGGTATCcATCccTaTACCcAATGtGACgaaccccacccGgtccgttAAgacaaCtgTAcggGTGTCgaacagtGTGCCgactcgAAccAgtccgggtcggcaattggtttcCGCgGcgTtAgcggcctaAGAcCccTgCcgaccTCgGGCTATTGTCATCGgGAAATAAAAGCTAATAATCTGGACCAACACAAGAGTACTTacagtcTctcGccACAAaGgGGGTTCTAGgCGCgGgcctcGAGGAtgaAGACaaaCaTTacaAtctCGcctgtgagcTTgTGcggtcAgcGctTgccccctcCcAaTTTTtGCTctgctGccGTCGgctTgGTcgTGGATTTggGTCATtGCcCcccgcGcacCGgtcccgAtctTtAgtGCTTCCCTCGTTgggCCgTTtgcgtTctggACTgCTAGcTTCTGGgcaAgGcTCCtcGAGCCctcTGGTCTTGCAATGCGAATCAATATTTAGCGTAGGGCTGTCTTGGGGtCccactataCcCggatggcccggggctcactGtcaGtTGcagagacccgGgTGCcCaCAAGCGAtcgttGAGTGATGTTcAGTAcgGggcAAGTATGcgcCGaATgCctgaACGcTAAACTATAgggccCGCGCTAGTCcgctgGgagactGATagcgccccatcaacgaggcctCaagAtCGAgttTtccTaTgtacGtggTgtttagttatCgCgctAgccccacaatagaagcctcataccgGggctgaacgcccAtgAtgcGcTtctccgcgCTcGCcctGCAggCCGttctacGgTcGcgGCaccactgaTtAgCcaTCAaGggaacgaaaatAgcctcgtaCgTcaGTATCGCAggTTTAGGCGtAAAGCCTCTTccTCAGgcACACgcGGcTTTTCTgCATCATcCAaTCCTCaACGCACgTcGCcAAAGAAGCgCGgGCAAAGTGGTTcCGgCCCtggccgagTgacAcatgtAACtgcaTATCgcaCcGCACATAGCcGATAGCATgTGTCAAGCTgTCGgggcAaCTTGTTGcgGcggggctgcGgcCTctGgggTgcggCaAccCgACcCTGtTgcgGcgatctacgGcggtccCTgttgaCcgaAacccaaaacgtggggtagaagtgtcaatagCagcacaccgtccccccGtcgcaggggggttcacgATccCctagtcagCatcagaaCgGGAcGgCCTaatCgTTAACcCcggcccgtggCAtctcTcctgAGAGCCCTgTAGTTCAATCCcAGGCCATCAcCcCGtTAACaatcgcaCgaAgggaccCCttaACgTgTCTgAaGcAATATGcaATATGcCGCGTTGAcCGATgCACTTCTaGAaCcGgGTgaCATAGGTGCATCCCCCCTTATTGATATCGAGCCGCaggaccggaggactccgGgTAACAgTGAGGCACTGGTtcAGgGGcTAtaTCtAGgCGGTTctCAACATgGcGgAGGTACcGCAGGTGTAcAGccCgtgCgAGTgcCcCTtcctgGcgcctatcTcagccccgccgTcccggcGcaTTgATccacgttagctcccatcgaGcAgccGtgacacTgcgtcccatggcctgattgGGCtacGcgtCggTTgagAcCGcGgcgacgtgGAcCcgtaccccccGtagCCGCCCtGAGTTAgCCAGtGcgTcAaGgGgGATcataGtcgcgctaAcgcagggtgcaggcagGtgagacAtaggTTgGCTTTTACGAGCTCAAATAGCCacTCAgGCgTCAGctGgggctacaccagtGtgcGAggAcccAgTCcGCgTACcATCgcgGTcCTgCAGCCTagTACAAAcGCTCGATcATCGgGccggCggGTgAgCATGtctaGCACACGTCgTGcggctgagtcCagATCcaaCTgATCGcgccCATgcACGAgcATTTCGCGcCGCagGCAGCATACTggGTGCagcccgcgCttGAAGgTgGCTGTgCATCGTacTccTcCAATCCtGGGGCCgAATGTCAGAGCgTACcccGATTAcgTCCcTgGAAGcgAATTACGTagAGACatCCTCtCTggCCgCGCCGcTTcgCAcgcAATATACGAATgGTgGggggGGgGGCgTCAgTgggtcccgtggtcccaActcccTggcggatcgtGTCGTtAtcGcGAGGgATAGcTTAGAGTAACAACTTTAaACCAGgGAcCTTGcactTgccaaacctaAcgtgctgccgtTtgcgtACcggAatacacGgGCTAGGGACCCGAGTAGATTAATTATAGCACCAGATgaTACGcAGCGGGGACATTGCgatAAAAGAgCgcggttcCgAgcgcCggcTAGAGTGTCGTTCGTGCATTTTCGGAAAGATCGATGgTCGTCAATcCTTATAAcCAATCGAGGATAAGTTAAGCCGgATTgCACTCgTAGcCGTAgCgagagcgtctggagGgAgAGAAACaccggcaCcAtagtGTTCCACGAGGcGAGccGAGGTGGAaTTTGCGtaGCcAgcgCCGcAAgtCTacTtCAACGCCCCTctGTgcaGAAGTctTTtTgtgacgtggcagaActGaTcGACGgTaCTGgGACAaaCaTccAAggaACtGtGacAcgTAACCGCGCgCCtCTcaaACCGTTGcagTCCcgGCTctGcgAgtaggatgagatTccccccacGagttCACTgAtcAaCgcctcaAGGCTAGTGGCAAATGTCCGTAcCGAATggGTgcCTTACTCAAccgtgGACTGGcaccCaCCCGAAGaCcATTtGTCcccctcttTTAgCGAGATTTCATaTTGGGTGAGATCAGAGCTACGCCGAGgGGGACTgAGATAgAgCGGGATGTGcGGCGaATGGAAcAGCGTGGTGGTCAGGTCCGCTAATGCCAATTCAGaATAGCCGaGaAACAATgGAAAGAATCcGAcATCGTCGACTGataCATACTTgAGcTGatTTCtTAaCTACATCAcCtcAGtCgAGTTccCGGGGACCCGACAcaTtcaTAaCTCgGGgCgcATcAGGttTgaaTAgcacCTTcccacgGctTAACAAatgcCgGTCgAtgGACGgGGTgATgTTAAcgGccCGTATCgGTGgACCACgTgTTGATctgCCTCatCACGTCCacCgAGGGTcaGttGgTCATAtaactttTccagcgTTCTTAAACGAgGATCTGtCcGtATcCgGTgGcaATCTCGGCCgAgggccgaaGaatGTTAGGCcAgCtAGTcAtggttgaacGtcTaaCgattctaAcAAGAGGCCCTCGCTcTCCCGGGAA
>reference_sequence
cgcaaagcaggtttacgtatagctagtgggagacgtgtaacaggcctgacacccttgggagttacaacccacaccggcacaaggcagagggagtatctgtgtgagagccggccgtgtcatcccggctacgcgcccgggaagccggtgccgcccgtgaggcaacagggcatgccagcaccatccggaagcgacggtcgtgtcacctggtagtgaaagtgcgtatcaatgtagtccaccctgtccgtgctagggcgcgaccccccccgcgtcgaggcgcagtgcccaacgagtccgcttacccaaagtggcccagaccccgccctcgctgggcgagtggtgcggcgcgggtcagaggggctgacgccgcggtgcgtcagaggcggcactcaccgggctgtggtcgggctacccgtccccgtcgctctcggcgctacaaggggagtacgccccgctcgccgcgcccggcatgaccgcaagccaaatcggcgcggagtgacattgggcaccccgaggcagccagagcttgtgaccggggcgggccgaacgtggacggggggggaacggggggcaacgtcgaaggaggcgggccacagggggcaagcggggctcccgcccccgtacccacgccagtagggagaattgcgttgcaacgtttcgcccctggtgcgcgcgtctcgactgctgccgtcgtcgtgggcaagagacagtcggcagtcgagggtcgcaccggcggtcttccgctcatggccgcgccctagcgcgcatgaggcgcgcctgggctaacgtagctcgtcttaaccgggtcctacggtcggtgagctgtgcgtctggaccgctcggaaacgccggtctctggaggctaccccgggtggccacctgccccgtgggagcccgcctgcccgaggcccgtccgggcgcccacccgcgcgggcgcacgcgttacggctgacgcccctcgccgtccggcgctgcccgggggcaagcctttggtctcagcccccctcagcacgagcgcgcagccggacaaaaacaactaggccgcagacgcatccgaccggtactcttgagagtgccccccccgcgcctggtcgccactgctccccccgctagcgcctccggaggcttagccttggcggttcgcgcgcctcgaaaagagtgtgtcccgcgtctctgtgcgtgagaaattacgttgcttggtcctcgttactacgtaggcgttgggatgcaaggccctatctccggagcacaaccgcatagcctgaacttcccaccaatacctattccgccgctatacctcccagagccggcccgccctcaccttgagcctgtgctgacgaactcgacccctggtgtccggagccgacagttgatcgttggccaccgagctgttaaccgatgcagcgctccgatgcctggccttctacggccgaccacacaacaaaaaaggggcagctgcggggttgaggggcgggcgccctgccaacgggcccgcggtccgcgtgggctaggagggtgagatccggatctcgccccgcctgttctagcaccgccgtacaccctcggctgcctggcgaccatgtgccccatccggaaggatactccatactcctgccgttaggagaagttcacgcgttccgcgcctccggggcaggcgctcggcaggccatcggaccgcctccccgcacttgggcgcgcctccgccatagggtttcccggcaaatggacagccggcaatcgcttgcagaggcagcaggcaggcacgcggtcggccacccgggccctggaagcccaccgcagcgactcttcgggctacccggggtggtgtcggatgcgtggcgccgtgcgaggggttggtgggtacgtcgacctacactgtcggacttgggtgctgccatcgtagcccgcgtggagctgcgcccctggacgctgtgagtccgttcgcggtccccgccacccgcccggattaccgcaggtaaaaacgtgcggcgcgcgcccatacgacgggggcgggccactccgccggcacccggaaggctgtgtgacccaacgaagatggaattatgtcgtgttccacccgtggtctgcaacgttcggacgggcccgcccgaggattgttggctccaaggagtcgaactaccgcacacactgctgaacattatgtgcggaggccgcatgacccctcggttcagttgggctcccgagtggtagaagggggctaatcaaagctggtggcccgaggttgagcctggggaaaaggcacgcgggtacagccccagacacaattggcagaaaagagctcgctcggcgcgtccgctgtacccccgcgccgtttttcccggcgcttcttcgcccccccgtcggccactagaaggccacggtcccggatttgtattcctccctgtgctggcctttggcccctgcgggggcaaggtaccagaccacgcggcgagtataactacagacataccctcgtggccgcgtctcgggccgccccgaccttttcgtgggggccactccgatcgccccaaatgtttgcccgccggccggtaactatcgcgctagagggcgctgtggacactttcccaccaatgggagtgacggtcattcctcgcccgggattacatgaggccccccgtcaggacgggcgccgcgcgatgggcgtccccacgagcaccagggcgaggtgtaggtggggactcccaggggtgccgcgggccccaaccgaagtagcagggcgcgtgcggggttcacagagcggttgggtggccgctttggcgtacccccgccggtccaccatttagcgcggtcgccgcccgctacggggccggggcacccggtgcctttcctcccgcatcgaactatgttgcgaaggtaactgtctgcgaagggtcatcccctccgcttatgggttgtgccccgggtcgttcacggcggtgtcgcgtggcgcgggctcccagcggaccgccgtcggagcacagttgcccaacgcagccgcgcgcctacttacggggggggccggagacggcttcttctcgcagccggcgctaagtaggtggcggcatcgcgcgcttacacggttgtcttcgccatgaggaggaccggccgcctacgcggctgtttacggtggtggcgggccccccaaggcatgggcgcagctggcgccggccggtgcgacagagtggctgcgaactgtcatgggtaccggggcgtggagcagaagcccgaggcaaacgccagaccgcggccggtaaacccggtacacaccacgctacgaatcgtgatggcggctcgccgggtggatctaccccgcacgccttaggttggagcgggctagccagccgtcgggcggatgccaccgccaaggcggggccccgaccgggtgagcaaccgcacatagcccttcaggacaagcgcctacccccgcccccctacccatcctcgccgatctcgcaccgagttgtgcctaagctagcgaaatcttgaccgggttgtccggccccggcctgagccatgcgaactcggagctcgggaccccacgccctctctcgcgtattttgcctccccccctcggggcggctgtgcccggtgattcaactagtctccgtagacccctggcgtactgcggggcccccccggggggactgttccggacgcgaatcgcttcacgagcctgtgtccgcactgggcgccatccgggccgctgggcggtcgacctgtggtttatggacccctctgatggccgctcccgttacgagaagcagcggccgggttgcgtgtccagtaataccccatcgcttacgcagcttgtacccgttaggaccaactatacgcgcgggctcaacgcgcccctgaccccgactgcggaacatctgagcgctgaaacgccccgcccgacacgaagcgggctgcgcccagccgacgagacagaatgtcggttttgaaagtgcaggcctggccgtgctcgtcccgcccgcgcccctgcgtgcggaacgctgtgccaacggccagctcccgcgggtggtccttgccccaaggtgacatggcgctccggcctgccgggtggggcaccgggggaccgcagaagccgcgtggcacgggatttgctcctgccaacttgacacggagggcgccctccgtcgctcggcggggggtttccccgacgccctgcaaccggattgtgacagtaaatttgttcgtttacattcgggaccggagtattgcctgagacggggattgacaaggagacgtttccatacccaatcgccccacggcgggggcaacgagactgggccactgtcgccccgcacccgccgttggccgaggggggcggggaccccggaaagccgtctgggcggaccccgggcaccgggggggaacgcacggcgatcagacggcccggctttcttccgccaattcgagggtttgaaggccgaatgagcctggtcggacccagatggtaagggcgagaggggggaaaccgcgtaggctcgaaccctgccggcttaggaagtggaagcaacgaccgcgccggcgcgtacgcctctacgcgactccggctcacagccgtccgcaagggcccagcgtcatgactagcgccgtcgggtaaggccagccgtacgccgcaagggtttggcctccctattgcgggcattagtcggcccgtgcttgcgtcccctacgcgaatcagtggaatccacctaaaagtagcctacttcctcgagcgaggtctagccggactgcggaggtcgaatcgtcctaccccgcgaaaccggccgcaacggcagctactctcaagatgcggaggcattggccgggtgcccgggcgtactgcctggaggcgacgcaggcggcctctagcggttgcggcccgtcgcgtccaccaccgcgctgaggagccggcgggcgcctagcgccacgaggagggtagcgggcccttgggattcggcgccggccaccagcgccttagtgtaggccgcggcgcggcctgtccctgcgcgttccccagggcttcccatccccgcgcgtgggtcggggccagggggtgccgttgccgtggtaagtgcggcaccggcattggggcccaatctcgcgacagctctgcgggtagtactccaccctatcgcagccaatttagtccgtcatagtggctatcgtgcgctgcgggcccctggctgccggttagcgccggagggctaccccccggaccggaccgccccccacaacattacgttgcgccggtggcgcggaggcccgccggggggtctggcccgcggtacaaaggatggccacctgcgaaaactgggtcccgattccccccttcttagtgaggctcgtagagcctggtcgcccctggctatgggtcaactcgggggatacctccggcgccggacgctcgccgcgcccccgaagtgccggaggtccgctggccctctagcgggcctagggcctgaatccgggcgccgccgcgaccccgagcacaaccccccagagcatcaacggccgcggttactgctggggacgcgattcacccaggagaagaccgtcccgcagctacgtgatcctaagctgagaagcctcgtgccccggcccctgtcccggtcgcgtcaggataccgcgctgactgccgaaatctagacgcggagcctcaggctcttgacgaccgcgggggttaccccttggccgcgccacattctgtgtcgaaacgtcgtgacgtcttcgtggggcggggggggggcagcgagagcgggagagcctagagtacggacagcgccggggggagggcggagggcgcaatggtttcaaaatcatcttccgagtgaaaggctatccgagatgcacacgggaccgcaacgcccacctagagctcctcgcagcgcgcgcttggccactataacgcatgcggcaacgagaccccttaccctgggaacacttgggggggggaggctggcgtcagttccgaacctagcgggcctttcctggccggacgggggccctgcctccctgtcgaggacgagccgtctagcggccgcgacgcttgaggtccccagatacatgcgatgacctaacccaagaagatgaatcaaacggacggcgtggcagtcgaacctaagcttgaagcccccttctccctcagaactgttcgggtcgcggcagcccgctagtacctgcgcccttctggctgcccccaaccgggcccgcgccatcgccgctcctccgccggacagtggtcgccacatactcaggagcgcccggggggccgcccgtggaccggctcgtcagcctctgatctggcccccattggtaggccgtaccccggattaaccgcgcaccggtccccgaggaccgaagccaccctcccgggcacccgcgtctggtacccggccccgcggtgtatacacggctcggactcacttaacgtccggcaggcgaaggtaagcgggcccggatccgaccggcggtgcacttctcggggcttcgtgacggcttacgcgcagcgggagcgaaccgatccgcctccgtcgcgtagtcgtcgtctcgcgcgccccgccccctgcctgctccggggcaatttcggggaggggcgagcccgtcttagtgagccccagggtgtgggcgcgaaaggaagccatacattctgagttccgcgcgggcccagatgtctctgtcccgggggcaactccgtgctcgcggcggcaggcgggccagttccagctctagcagctcactcgattgcaaaatccggccccctcggcgtctatgagctacagtaggcccatgcgtcgtgttcaggcgcgccgcagtcgatcgcctccccggcgcaagggaaacctaatgtcgggtgccctgtccaactgacacggcgcccccctcaggcaccgtgtcaaaccgcagccatacggccccgcccgtacctaaggtaatcagcggaggctgccttccgcgtccagggttctagggtcgtcgcaacacgctcctgaccggccgtggggcaactcggccgagtgccctagtcggatggccgccctcagcgtagttctgggttcgtctgaacatattccaggccgctatgcggaaggaagggtagcgtagaccaagtaagcctggcgcggtgacccaatttcctgtcccagacgcgggtgttcgacgtcgagacttcaccaatggtcatcggctgcactcgaacattgagtatgggccgaacagccgaacgccatatgtaacgcgctagtgacggtgcgcgctgcagaggccatcaggcggttcggaatgtcccgctgggcccctcgcctgcaggggcgcacgacgtatctagagcgcacagctgttaggagcacagactccacgtgtcccgcgctaacgcgctccccccgatgcggcgagatgacagcggtcgtttggtctcgccactcgagtggaaggcccgccatccaacgttatcgcctgggggcggcattttggtaccttcggtcacgctcgcctgtggggccgccctgaagcggaaactgtggggcgggttgggggggtcgaggggatcttggccggccatggcgctcggtccgccgccagtgccagggcgcggcacagccccgcgtaccgggggggtggcccgccgcggttccggccctggctcgcgccccgccccgcccccggggcctctaccctagcctcgtcttgttcaccggtgggcgtttccctgatatcatcgtcgccacagcccgtctggggtgaaagtacggtaggacccgtggaagcctgccgagcacgcggttcacggcgcgcggaggagcactccctgggcgggccaactcacgcttcgcaggttgccttgggtggccccgcctcttttgggcaagccaaccgatggcggtcgggattgccatcgcagcacgggcgcccaaagcccgtgcggccgccccagtgaactgccctctcccccggaagcgcccagtgcgcgaaccggaggcggggagcaggctcccggggcccagcagcggtagcgacaggtggttaccacgccgcacaccgatggctccccatcgccgtggtccgaggcagccggctggcctcgggagcgcctcggttaaacgccctcccgccgctccgtcgcttgcgtcccccccccccagcccaattagaggggaccgtgggggcgggctgtcgctcagggaccccggcacgtcggccagcacgcgacgcccagcagccggggggacgtgcctgtcctcccgggccagttttccaactgtttggcctctgaagaagctaccgctccgagccggcgtcgtcaaactgctcacctccaacccagttgagtctgtgcagcgccggcttcagcccccgcgcgccggggccagccgttcgtgcgctctgcgtggccgtctaagtcgcgaggcacagagggaagtgcggcgacccgtgccgtttcctttggggatcgtgtgctatcagcgttcccgcatgtcgatggagaggcaacgaagggcattgtgcgccgcctaacgcctctggcccatgtaggggtacacgggaccgcgcgcagaaagtatagttttgtacgcccgccttgtggagcaacacaaggcgagaaaggacacgccacccgaccccgtggcgtttgtcggtcagatgccggccgccctccatcgttctgattgctcgtagggtggccgcccgttcatactaccccgataggccgtaccttttaccggcaccctcctcctctcctcgatcgtcaagacgcggctcatagcagcgtggactacctcgtcgtcacgcccacgacgggcccgcgagggcgcgcgcggatccaaggacccgacgaggtggaagcactccggaagccggtacaccaccgcagggccgagagtccatcagagataggaccaaatcgcttggcggccgggatcaatcgtcgtgggggaacaaatcgggctttacggtaagacccccagtcaccgggtgcagtgaaactacgaaggggggcgcctagtcgcaagaggggatgcgatcggtgaccagcgagagagtggctcgcggggacttctcggtcgaagttgtgccttccgcccacgtccacactgccgtggacgacaccgagtcgtagtggggaccgcacccccacgcggcgtcgacgtacgctccgggccgccttcaccgttcgctgcgggatacccacgagatgcactcacgaggttcggagttgagccatcggactcccgaggcgtgcagccttggagggcattcgtagaaactgcggcgggttgctcctggcgtcacgcgcggaggccgtcgcaagaggttgtcccactaggggacggcgtggagctgggcggacggcttcggtagaagcaccgtggttgacaatacactgggccagcgctctagagcataggcactaggcgagagggccgcatcgcattagcgttagagccctaatacagcgactcaaccctgctgcgcccgtgggtggataggacgcccacacccgccgccgtacgcacggcgtcacgacctattgctcgaccatcgcgctgtgctcgacagggtcgcgcggctcccgcgcaggcggtcaattttagacactgtacgcccgacaacctttaggccccccgctcccggctggaggggggagatggtcgccggcagcattacttagaccgagtccaacgttgtcgctcggtggaggcagggcgttcgcccacgcctccggctgccccgcttcccaggtccggggggtcgtcgctctggaaccgtaggccggttctggtatagcctgctccccgtctccccgatgccgcaccaccttgacgggtcaagcggtgcccccccaccgcgggcgggcccagcttattcggccgccctgagtgtgcctcccctttactgtgtaccgaaccggcccgcccatcgggaaccaaccggcgcccgttcagtgctggcgggaggccccccccacccctccagggggtcggcggtaacgacaatgggacccaggcgaccgtccagtccgccagtcacccggggcgacgaccccggccctcatgtccggccccgtatttgctacacgccggccaaaagcaacatacggattgtgggcatcatatttgtatcacccacaggccgtcctccgttgccacgggacgcgtggatctcgttgggatcggttcgaaccgggcccccttctgaaacgcaccgtagccggcctgcgcaacgacgccacggggcggtcgccagtcgcttgtccccgggggcggtcggcgggctggtatggtaaactctatcgtcccttaagggaacagattcgctatggggcatatcagcccaggggtatgggcgcctgtttcccctcctgatctcaccccgattgcggtagcgcgcgcgcaaaggtgccacgagcttcgcggcgccactctccccccgcgccggacgaggtcgcccacaggtgctgctctaggtggatgattgtcccgggcccaggccgcggcgccatcatttgccgttctctatcctcgccccgtcctgtatgcaaccgtcccggaccttgcggggggtcacgttacccgttggtcaacggacgtcattctcttctagctttagggacagatagtgcagggttcgagccggagcgcgcgggatgcatggccgcccttcgggtggcctcagcccccccgcgtgggtgcgctggcaaccccaagcaaacccggccgcgagaacggcatcggcgcggcgttgcgtcgccttctacgcaactcgcagaggcgggatgaatgccgctgaggcgctcgcagggacccctgcacccgacttcaaacgcctgacgatgccgccccaccacccgtgaccaaacctgcacgagccccgacggctaaactctcacggtacaggatggttagtcctcaggagttgcatgcgcatcggcttgcattggtgatcccgtcgccttcaaggccccgcagttggctggggcctcgcggcagccggctacaaccccggcacggcttggcgcgggtgcccacggccagttagaggttccccgtggcacgggatcggcgggggtccggggtcgcaggggccccagtcgcagcgcctgcaacggcccactgacgcgcagcccggtcgcgcggcgagccgagtctaattcgagcggcgggatggcgttacggacgggcgtcgccataccatcctgcggtgggaaaggtgccgccgggtgccgttctagccggaccggaggaaggccgccgggccccgacttaccggttgggggcactgttcggggaacgctccacccatcatcaccaagttgattcctcggatcctcctgcggacggccgggccgcgaacgcgcccgaagtcgtccgccaacgagacgggtcgcggctatggaccggtctattgtgatccggtgattgaagaatcacaagagcggtaacgaacgcgaagcgggtttatcgcgcctcctctgctgcccccggacagtttgcctagccccggcccagccagccagttgaccgctacgatgagctataagctcacggcggccctgacgacgagtcaatacggggtgttcggcgacccttgctcagcgtccattgggcggccaagtaccagaactcttagcgcaacgcacacctcaacgccagggtgagggaaaagaccagagcacctcgcccgcgcagggtgcccgccgcggcactacggacagggggtgagctcaagaagtggctgtaggtgcggggcaggcgcgcggcactcccgagggatgctccgtgcgggggcagccgcggacggcttctgggtttcaaacatccaggcctccgcttcaacccccacggccccgccagtcatagtcctcggggggggtagggcgctaaattttttgtgtcccgcggcaggtagagattcaccaccctaaagaggctctcgcccgccgatgcccgcagggagacaggcggcacaaaagtcatgtggcaagcgccaagggttgggccccttggagggcctgcgggcggggattgagcggcagatgacagatggccgattgatggggcgccgcggccagaaagggcgcgtaggggacgctgcgcgtcacccccgaaacgagatcagcgctgggcggcgcggttgccccggatcggggtggtcccttgggcttggcccagccggcagcggcgggcagggccacacaggtacgggcactacagacgtaccctgcgatcccctcctccggtttcccccttcccatgacgcgatctgcgtcctgtctgcgccggcgcggggaggggtgtctcaccggagacccatggttcccccgctgtctcatggctatcgcaacgtcaaagtggcacagctaatgagtagggaccgaggccccggcgagacaagcgggctggaagtcgatcgctgtaggcgtcgcgaggcccaggacccacatagggggggaccagctctgcgagtagcttcaggggggccgcagaggaggccttcaccgacggcggcgcggtcgggacatgaggtagaaagccacagggagactccgcaccggagggagtgcgggctggggtcgaaaggagcgggcgaggcacgaggggcctacccaaggggcgtgcgtttgcggtaacctaaaggcccgctacctggacggggtggagcggcgcggcggccccatacgtccgggtcgcggagagggagaaggcgaccgtaggcgttgtcccgcgacacgcctcaccgatccgaacgccccgggagagccgggttggacgcgttccccgtagcggccccgcgcgaggccgcccggtgaggggcgggacgcaacgactccggccgcgacccgggctgcaccttccgccgggcccctgccgaggtgggacgtgggtcttcgaagtgtacctgaaagatcgcgagcggggcgctaggctgcggatccctccctcgcgatacccggccaagccccgtgcccgggtgggggtgggttatctgcgcggtgtctgcccgcccaggcgcgccgcgttaacgaacgggaggaccagcgcggaatcgtcgtttccgagcccgcacgcccagggagtgaccggcactgcggggggccgctggcgctcattcggccgatgcggctcggcgcatagctccctgctatctactagtgatgtatggcccgccccggggggaggcgcggtgggtctccgacgccgctttgccgccggataggggaaggaagacgccctgagaataactcaccgcaccccctccgggcggtcgagcgtgacgcgtgccagtcacccgcacaggcagggcacggtcagaccaggttccgtggggaggggtcgggggtagaggccgatgcacgggacgaccgcgtgaggttggaccgagtgaggttgagtcgtcgcgcgctcccggacgggcggcgcgcgccagtgctcgagtctagcctgtggggtactctgcgcagggttaattgcgctggcagcccagtcagttcgccttgagttatctgtcccctttcgcgatctcatgcggtgggcaattcgtctacggcccttcccaggctactgcacggcccatgctcgtttaggatcttcagccgcgccgggccgggagggtatgagccctggtgatgccgacatcccccgagatgctcatcccctcgtggcgccctggcaggtggacttgggatggccccatacgtacggacgactggctgctgcgggacatggtgccaatgggaccgctagtccggggggtatccccaatgccccttgcacgcactttcgggcggtggcggttcgcgtgagcggggaaacgcaccagggaagctgtacccggggccggagtcgagcgaagccgctggccaagactgatttctccggcggtaacgcaacccctggttatctattcacggtgtgacccgagccgacccccaatctctaacccgataatgcggtaggacgtttccggtaagggccgctttacggagggttaggcttctcaccccgccgcattcccgataggggccccaggcccaaccgaccggcgccctcccgccaacatcacaggggcagggggctggaacccctcggcgccccacggcgcccacaggcgtgtcagcatccgccctgaggcaaggcttcttgtgccagcgcaggcgtccacctacacgaaaggaggtctaatggtaggtccccgaatggtgagcgctggcggggctggggagtctcggcagcgcccgccccaccgcgcaggcgcgcttaccctccctggtagcctgatctgtccctgcacccagggtggtagcggctcacctcgcagggcccgggctatgcctcaccgaacggtcccgaagcctatcttccccgttgtggtgccgcctcgatcctcgaaccgcgtttagctctggacgctctgaggatcgaggcggcgcgtttaagaaaaacacctcgtgtacaatgtgtccccgccgcagagctatggaaacacgtggacagtccgagagttgcgggtctagcaggaggggcgccagcaggactgccacacagtcgcgatgtagtcagggaacagacaccgtctcattgtgaccgaccgattgctcagcagcgctggaggcgccgccgccgcccacccggcccccccggaaccgggctcgacgaccattcttcgtgtgccgaccggtcgcttaccacgcgttggtacacggtcactcctctttcgctacacgaaaaatctagcaccaagctgggacgggacgtgggggctggcccagctgtcccctcggttgttgtgaacgagtccgcggacgtctcggctagctcttcgcgttcgtctactatacatcacaagacaccatggcccttcgagagtcctgagggtgacgagcgcggccggcgcgtcccgtcccaacctgagtggagccccgtagagggcgacgggctggcacccaccccaaacgttcgtcctggcctgtagcccaagggttgatgagagggctctggcggcaggcggttgatcgcgtggctgcgcgtacgactctcttctacgctccaaagccacattctgacagaggcctcggtgcagccgtcggctccgtaggaactcacccgtctcccgtgtccctgtgcgtcgctaagagagcccttttgctggccgctttgcctcgcctacaggcaggtggcggccgggggtgggacagggtccgccggaccccggtcccagtaggcctgaggtgggactcacctcgacccattcggtcatggaaggacgctccgtttcactttactatcaagggcggatcgctaggctccggagagcctcgcgggggggcgtaggggcggggtccgaatgggtcgatgagtgagcagcccccctctcgcgcgcttgggaggccgtgtctcatagggtggccaccatgagctcacgtgcaccccctgtctcgctttgcatccctggtacagccgcacttgggctcggcgaagcagtaccggtcgtaatgggctagctgacagtgaacgcctccctagtgccgcacaatagtcataacctcaacccgcaaattgagagcgtgtaccagctcacgatgagtgaggacctgcaggtatagtctgacagtcgggtggactcgcggacggcggcattgtggcggacctgatgctcccgcgtgctggcccagcgtgcactgccccggcggacctccgaccgcaccagtagagttcgggctaagcccccaatccttccactgtctgcaagacgcgcgcgcttggcgatacccggggggggagcgcaacggtccaagggcggcgggctgctgggccggcggcgcggcggggcacacgggggggcggctgagaccgtttcgtggctggccaggctgcagctcccaaagggcgtcagggggcatccccgggcgggagaggccgcgacttctgatagtgggtgccctatgctggtgaactatggccgttgctctgtcccagggcccaggatggcgggaggtacatgtgcagcaagcacgccggaccacgtcaggcgagagaggcgtagggaaacggcggggaggacgttttcgaggggggggccggtgctcgccacggggggctgaacaccagtgaaagtgccatcccggtgctgaccctctcgccgccgatgccgccaaaccccaaagattatcctccctaaatcatcgtgggcacgcggtcgagcaaaggggcgggcttgtagctagactccagcctcgttcgcgtctcgttctcccttcgagggccttgccagggtccaccagaatcatctcctggctcctttgtagacggcgcttattgttcgcccggagttggcggaggacgggcaagtggcgtggccccctactagtcactgtgtagttcgccttacccactccgtcgctaacgccgctgggcgagtcggatgctgtggaggcagcaatacgggtctaaggcccactacacgaacccggaacggcacaggattgtgcgagatcgggccagccgccattcagccctatacaataatacccccgagggggggggggccgctaagaataggcgccaccgcggctcttggccgcacgcccgtccaatgtgcttacgtgttgcccgacccgtcccggttcttagtgaggcagccggacgaggtagacctcgagcgcgtgggcagggcgaaaatcggcataccatgggggaaacgaccagcagctgttgcccgaggggaggacatcaacgtagccggaatgccggggaggccgcgacgggcagaccgatgcccagcgcgtgaccaacacaatcttcggagagtctccagacccgctgattccgaaaccctccctaatagccctcacgcagagttcatgctgagcgggctcgcctcaacagcacgtgggaacacgccgggcctagccgaacttgtatcgtggggccacgccgtcctaagcgccggcattcgctctcttttagcatcggagcctctacggcgcctcgtgctgcggcgtcgaccgctctgtttagtccgcacggggggatgcggcagcgcggtaagctccgttgcccgtgggcgctgttcagatacaactggcactttgacccgcggtcatggtttggaactgaggtcagcctcctccagggcgccccggcgataaagatcccactagaacttgctgctagtattgttccctgctgggccaaaggcagcctccagagcacacatgcgactgtgaaaggtgagcggcgctgccgaggctgcccctccacccggatgaagtcaaagcccgagcggggcggcccagcggtgcacgccggagcgctgagaatatatgcagccacgtgccgcacatgtcgctccgggcccggttgctcctcttcaagcgtagcgctaccggccgggaccgggcggaacgatacctcccattagcggcccagtggcgggagccgcggtcggaacgccgtagtgatctcggtccgccacgttcgggcagctcgaaacctcttactttacaactccggaggcgtagcgattcaagggacttctctagcgcgcctgcgcctttcccactatacgtggcagtcagcgggcaggcccgcttggctgcatgcgactccgttgaaacaccctcgtcagtccacgtcgggggccgacaacgccgctaaactcacagcctccctgaggctgctatgcacacttacctcgcaccgtctcgacgcctagattgcacccaacctggtacacctcggcccgttctacgggcgcgggccgttggggggcccccccaggtcagtgccagcttcaggttccacgcagactttagcacccggatctgggagatggaagagtccacacgttacacatgaataaccctgatttgcgggtgttgtccaacgcgtccggcacattccgagccgccgcgcttcgcgggcctacggctcaaaactggaccgtgcgtggggagagccgtacccgccgcgtgcgcaccggggccgatcaacgttcggggcgggggtgaactagtgggtgaagagtcctcgcctcgcaggggggcacctctagcaacggccggcgcgccgcagatttcagtggacgtccccgccactgagaccagttactacggccttaccttctcggttgtctggcgcccccgccatttgcgcgtcgcgatcttaacaccggctaagtcctgccaagaggtctaaggcaggcctaagtgggtccgcgggcttcactatagccgttcttcgctgcaggccgtcgtaggggatccctcggcacgtcccgttgatccgtgctgtctgacgacgaggcaatggctaacgaccgaactcctctggcaccccaagggtggtgcggcgcgatcactcgccatgtaacgcgtcctctccactgtcgcaggcgcgcttgccgaggtccgctgcggtccccatgcgggcgagactcctgggcagggggccggaaaacatggcgatagcgccgtaaggcaagccgggtcagccaaacagcatagtagcgaacctagatacggtgagggaggggggggccgctcaccaaagcggcgagcggcggtgtggcggcgaccagccctgtttgcctagttttcaacactggcctcctggcggtggcaagacgccgcgcgcagcgtacatgcccaagtcatgcggaacataccgagctcgctcttttccctcagccgccctcggggtaggggccctccttgtacgtgctggcacgatgtcccggtatcgggtccgcaacctccctgggagattgacggagcagatcgatacgggccattccagctggtacccagccaatgagcctgcggcggggattctgccggtgaggccggctgctatgtcgtcccggcccctcccacgtattggcccccgcaggcaatagggagtcccccctgccaccctaacatctttctactgcctcggcgacagtcgtagcgtgagcggtcgcgacgccgtcaccatacagggagcggcttaacgggcacgtacgcgcccgtactacccgcggccgccagccggccacaggaagtgccgaaactccgcggtcctccgaggaacgcggcccgcggccccatggagggggggggaaggggatgtcggcacaagtgccatggaggtgcgggactttgagtcctgacgcgcggctagctcctgatccgccggctggtcacgtggctgccaggtcacctcagatccggggtgtcctccagcaggcgcccaccccggtctcggagggcctcccgacggggccgcgctccggccgcggtagggtccgggcccccccccttacccgcccgataaggcacgctcccaaattcctggacccgtccgggcattatgcatagtcagcgctacactcccaacggggtgtgcggggcctctccgccgccccagtcgcaggagacgatgcaaaggatctgtcccggtcggccgtcgagcgaaacaaccgggggaatcgaaaagcgacggtcgcgggggcgccgccgaatgccgagcgcgattggcagacgaccggggtgaagttccggggtcgcgcaattactaaccccaagggatccccgggggccgagggccgcacggtggtcccagatttgtagagttcggtgcagcgggatacagcgcgggcggaatgcgtagcctgggtgttccccgaaacgggctggggtcgccgtcgtgacgcgggggcgccccgctccggaggggagcgtagagagtgaggctaagacctacgaaagagtgcccctggctagaggtaagagccttatgcctcgggtccggcgacgcatggcgtctgctgcacaggcggggcacgtgaaccgactaacagtttcccggctgattgcctcggcccaaacgctcgctcccacggtcggcctagtgaaccccaccctgtccgttcggacaattgcgcggacactgaacagtccagggactcgggccggtccgggtcggcaattggtttctaagtcggtggcggcctagacctccggacgaccgggaagcgcgtctgctagagggcggggcgcggcggcggaagtgggtgtggcgaggaccacagtccctcaccgtcgaagcttcatcgtgtatgcgcctccgaactgagcgtaaatagcacagtctgtcctgtgagcccgcccggtccgcactcgccccctcgcgacccctctactgctacctctagctcgaccgctaggccggtctcctagctcccgctcactagtcccggtctgtcgttggggtgggtcggggtggcctgcgtgctggcgggtcgacccacctgcaggccgtatctgtgtctcgatcgcccgggcataggctggcgcccgagccgctatcacggctccatgccactatatcgggatggcccggggctcactatcattcacagagacccgcggctcaaggtatcgtcgttagtgtgcacgcgtcccgaggccgccggacgctcagcgtctgagatccgggtcgcggggcctatatcgacgcgctgagagactagcagcgccccatcaacgaggcctgaagctttcgttgtcccacgtacttggcgtttagttattgggctggccccacaatagaagcctcataccgtggctgaacgcccctggtgctcctctccgcgtccatcctctcggggattctaccgcctcgttaccactgactcgacagacatggaacgaaaatggcctcgtatggcaccggtaggggcccgcatatgggcttctccccctgagcgtctgccccccccgcgagcggcctgacggaaaggcagggccatcgggaggcgggagctcggactcccctaggtatggccgagcgacccatgtgtttgcaccgagcaacaacagcgaaccgcgaggcggactcgtgggcgcgggccagccccgtcgccggggctgcagcagctcgggcgcggtagcctgcgctcctcgcgtcgatctacgacggtccgggttgagcgagacccaaaacgtggggtagaagtgtcaatagaagcacaccgtccccccatcgcaggggggttcacgggcctctagtcagaatcagaatgcctctgtgcaatggccggactcggcccgtggagtctcccctggcgcagtcgggaccgcgggtcccattccagctctttcgctaatcgcatgacgggaccgtttagggcggggggaaccgccaacagcgcccactaccagctagggtgagcgaacgaacagccgaggcgccccggctgtgggccgggagcgctagattttaggaccggaggactccgagcggtcggccactgtcatctcgcgacccgtacttgtggtagccttgggccgcccggaacggcctgaacacccgaccagtgtggacgctcgctcctgtcgcctatcccagccccgccgacccggcccagcgggccacgttagctcccatcgaccggccctgacaccgcgtcccatggcctgattgaattactcgtgggccgagtcgactgcgacgtgagctcgtaccccccctagttaggataccccggatgttacgccgatgtgcgccataatcgcgctatcgcagggtgcaggcagctgagacgtaggccgctcccccaagaacggcgcctgtacgtcgaggcggcctcgggctacaccagtatgcctggccccggctcaggccgcgctgcgacctcgggattcagggtgggcatgtccccgctagaccgggggacgcgtggatctaatgagtactgctcggctgagtcgaggcacaatcgggtacgcctgggcgtcggccaccgaacctctagagctggggtgggtcctagcccgcggttaggtgcgatgtggtccatcacccccctggctattttatggggctcgcccatgcctcccagccgcgcttccgatgccggcccctccagcaggatggggtacgggtggcttacgccgtgcgccgcgggtccgggcggtggggccgaatgcgcgcgggtcccgtggtcccagctcccgggcggatcgtcctcctctctcacaaggcgtcccgagccggtggtcgccacgtgagcgctccccactggccaaacctagcgtgctgccgtctgcgtcacgggatacaccgatcgaatgtttagacgtgccggcccgcctgttccgcgaggtccgctaaacgggccatgatgcggaggggcggttcggggcgctggccgagccacaaccaccatgcccctcaggccgggcggcgctccggggctcgccggcgggcgtgacgctgaccggaagaggccgaggcagggacaacggtgagagcgtctggagtgcggacggtaccggcatcgtagtaccttgaagcacagcccagatcacgacgcaactaagcggcgtgccgggtacacctgcgtatagtcctccgcacggagctcctggtgacgtggcagagctaagcagtagcatcagcgtgaagacccggggagatataacccgcggtgagcaggattccaagttagcacagcagcgcgcctacgggtaggatgagatgccccccacaagtttgtcggtcgaggcctcacattcctcaatgggccgtgcggcgaggcggacgctccgtggcgccgtgagggatcaccaaataagtcagcccgttatcccctcttcctgtagaggccacgagccatcagagggcagaacgtaattgtgaaactggctgcgggggacagcacaccctaacctcggcgagccaacttcggaactgataggcattgccgtgtagggataaatagggggcgagggagggtccccgcgactaggcaatagcggaccggaccaatccttcgatggtgcggcgtcgcttggaggcctaactgtttacggcactcaccatcggaagggcgccgtcttcgaagggcacacccccacgtctcgcagcatgcagcctgttgtgttgaccggaggcgccgcccgtgcctgcgcggaggtgcgcgagcctgttctatagtccaaactggacagcaattcgctgcgtaactttcccagcgcctgcggggacgcggtccttcttgcctgacgccagctgtaatagggggccgaaaaatcccccaacggttgtgcctggttgaacatccaatgattctagcgcagatatgcaatccctttaaagc
>trimmed.Xcm2005.SRR489154
cgcaaagcaggtttacgtatagctagtgggagacgtgtaacaggcctgacacccttgggagttacaacccacaccggcacaaggcagagggagtatctgtgtgagagccggccgtgtcatcccggctacgcgcccgggaagccggtgccgcccgtgaggcaacagggcatgccagcaccatccggaagcgacggtcgtgtcacctggtagtgaaagtgcgtatcaatgtagtccaccctgtccgtgctagggcgcgaccccccccgcgtcgaggcgcagtgcccaacgagtccgcttacccaaagtggcccagaccccgccctcgctgggcgagtggtgcggcgcgggtcagaggggctgacgccgcggtgcgtcagaggcggcactcaccgggctgtggtcgggctacccgtccccgtcgctctcggcgctacaaggggagtacgccccgctcgccgcgcccggcatgaccgcaagccaaatcggcgcggagtgacattgggcaccccgaggcagccagagcttgtgaccggggcgggccgaacgtggacggggggggaacggggggcaacgtcgaaggaggcgggccacagggggcaagcggggctcccgcccccgtacccacgccagtagggagaattgcgttgcaacgtttcgcccctggtgcgcgcgtctcgactgctgccgtcgtcgtgggcaagagacagtcggcagtcgagggtcgcaccggcggtcttccgctcatggccgcgccctagcgcgcatgaggcgcgcctgggctaacgtagctcgtcttaaccgggtcctacggtcggtgagctgtgcgtctggaccgctcggaaacgccggtctctggaggctaccccgggtggccacctgccccgtgggagcccgcctgcccgaggcccgtccgggcgcccacccgcgcgggcgcacgcgttacggctgacgcccctcgccgtccggcgctgcccgggggcaagcctttggtctcagcccccctcagcacgagcgcgcagccggacaaaaacaactaggccgcagacgcatccgaccggtactcttgagagtgccccccccgcgcctggtcgccactgctccccccgctagcgcctccggaggcttagccttggcggttcgcgcgcctcgaaaagagtgtgtcccgcgtctctgtgcgtgagaaattacgttgcttggtcctcgttactacgtaggcgttgggatgcaaggccctatctccggagcacaaccgcatagcctgaacttcccaccaatacctattccgccgctatacctcccagagccggcccgccctcaccttgagcctgtgctgacgaactcgacccctggtgtccggagccgacagttgatcgttggccaccgagctgttaaccgatgcagcgctccgatgcctggccttctacggccgaccacacaacaaaaaaggggcagctgcggggttgaggggcgggcgccctgccaacgggcccgcggtccgcgtgggctaggagggtgagatccggatctcgccccgcctgttctagcaccgccgtacaccctcggctgcctggcgaccatgtgccccatccggaaggatactccatactcctgccgttaggagaagttcacgcgttccgcgcctccggggcaggcgctcggcaggccatcggaccgcctccccgcacttgggcgcgcctccgccatagggtttcccggcaaatggacagccggcaatcgcttgcagaggcagcaggcaggcacgcggtcggccacccgggccctggaagcccaccgcagcgactcttcgggctacccggggtggtgtcggatgcgtggcgccgtgcgaggggttggtgggtacgtcgacctacactgtcggacttgggtgctgccatcgtagcccgcgtggagctgcgcccctggacgctgtgagtccgttcgcggtccccgccacccgcccggattaccgcaggtaaaaacgtgcggcgcgcgcccatacgacgggggcgggccactccgccggcacccggaaggctgtgtgacccaacgaagatggaattatgtcgtgttccacccgtggtctgcaacgttcggacgggcccgcccgaggattgttggctccaaggagtcgaactaccgcacacactgctgaacattatgtgcggaggccgcatgacccctcggttcagttgggctcccgagtggtagaagggggctaatcaaagctggtggcccgaggttgagcctggggaaaaggcacgcgggtacagccccagacacaattggcagaaaagagctcgctcggcgcgtccgctgtacccccgcgccgtttttcccggcgcttcttcgcccccccgtcggccactagaaggccacggtcccggatttgtattcctccctgtgctggcctttggcccctgcgggggcaaggtaccagaccacgcggcgagtataactacagacataccctcgtggccgcgtctcgggccgccccgaccttttcgtgggggccactccgatcgccccaaatgtttgcccgccggccggtaactatcgcgctagagggcgctgtggacactttcccaccaatgggagtgacggtcattcctcgcccgggattacatgaggccccccgtcaggacgggcgccgcgcgatgggcgtccccacgagcaccagggcgaggtgtaggtggggactcccaggggtgccgcgggccccaaccgaagtagcagggcgcgtgcggggttcacagagcggttgggtggccgctttggcgtacccccgccggtccaccatttagcgcggtcgccgcccgctacggggccggggcacccggtgcctttcctcccgcatcgaactatgttgcgaaggtaactgtctgcgaagggtcatcccctccgcttatgggttgtgccccgggtcgttcacggcggtgtcgcgtggcgcgggctcccagcggaccgccgtcggagcacagttgcccaacgcagccgcgcgcctacttacggggggggccggagacggcttcttctcgcagccggcgctaagtaggtggcggcatcgcgcgcttacacggttgtcttcgccatgaggaggaccggccgcctacgcggctgtttacggtggtggcgggccccccaaggcatgggcgcagctggcgccggccggtgcgacagagtggctgcgaactgtcatgggtaccggggcgtggagcagaagcccgaggcaaacgccagaccgcggccggtaaacccggtacacaccacgctacgaatcgtgatggcggctcgccgggtggatctaccccgcacgccttaggttggagcgggctagccagccgtcgggcggatgccaccgccaaggcggggccccgaccgggtgagcaaccgcacatagcccttcaggacaagcgcctacccccgcccccctacccatcctcgccgatctcgcaccgagttgtgcctaagctagcgaaatcttgaccgggttgtccggccccggcctgagccatgcgaactcggagctcgggaccccacgccctctctcgcgtattttgcctccccccctcggggcggctgtgcccggtgattcaactagtctccgtagacccctggcgtactgcggggcccccccggggggactgttccggacgcgaatcgcttcacgagcctgtgtccgcactgggcgccatccgggccgctgggcggtcgacctgtggtttatggacccctctgatggccgctcccgttacgagaagcagcggccgggttgcgtgtccagtaataccccatcgcttacgcagcttgtacccgttaggaccaactatacgcgcgggctcaacgcgcccctgaccccgactgcggaacatctgagcgctgaaacgccccgcccgacacgaagcgggctgcgcccagccgacgagacagaatgtcggttttgaaagtgcaggcctggccgtgctcgtcccgcccgcgcccctgcgtgcggaacgctgtgccaacggccagctcccgcgggtggtccttgccccaaggtgacatggcgctccggcctgccgggtggggcaccgggggaccgcagaagccgcgtggcacgggatttgctcctgccaacttgacacggagggcgccctccgtcgctcggcggggggtttccccgacgccctgcaaccggattgtgacagtaaatttgttcgtttacattcgggaccggagtattgcctgagacggggattgacaaggagacgtttccatacccaatcgccccacggcgggggcaacgagactgggccactgtcgccccgcacccgccgttggccgaggggggcggggaccccggaaagccgtctgggcggaccccgggcaccgggggggaacgcacggcgatcagacggcccggctttcttccgccaattcgagggtttgaaggccgaatgagcctggtcggacccagatggtaagggcgagaggggggaaaccgcgtaggctcgaaccctgccggcttaggaagtggaagcaacgaccgcgccggcgcgtacgcctctacgcgactccggctcacagccgtccgcaagggcccagcgtcatgactagcgccgtcgggtaaggccagccgtacgccgcaagggtttggcctccctattgcgggcattagtcggcccgtgcttgcgtcccctacgcgaatcagtggaatccacctaaaagtagcctacttcctcgagcgaggtctagccggactgcggaggtcgaatcgtcctaccccgcgaaaccggccgcaacggcagctactctcaagatgcggaggcattggccgggtgcccgggcgtactgcctggaggcgacgcaggcggcctctagcggttgcggcccgtcgcgtccaccaccgcgctgaggagccggcgggcgcctagcgccacgaggagggtagcgggcccttgggattcggcgccggccaccagcgccttagtgtaggccgcggcgcggcctgtccctgcgcgttccccagggcttcccatccccgcgcgtgggtcggggccagggggtgccgttgccgtggtaagtgcggcaccggcattggggcccaatctcgcgacagctctgcgggtagtactccaccctatcgcagccaatttagtccgtcatagtggctatcgtgcgctgcgggcccctggctgccggttagcgccggagggctaccccccggaccggaccgccccccacaacattacgttgcgccggtggcgcggaggcccgccggggggtctggcccgcggtacaaaggatggccacctgcgaaaactgggtcccgattccccccttcttagtgaggctcgtagagcctggtcgcccctggctatgggtcaactcgggggatacctccggcgccggacgctcgccgcgcccccgaagtgccggaggtccgctggccctctagcgggcctagggcctgaatccgggcgccgccgcgaccccgagcacaaccccccagagcatcaacggccgcggttactgctggggacgcgattcacccaggagaagaccgtcccgcagctacgtgatcctaagctgagaagcctcgtgccccggcccctgtcccggtcgcgtcaggataccgcgctgactgccgaaatctagacgcggagcctcaggctcttgacgaccgcgggggttaccccttggccgcgccacattctgtgtcgaaacgtcgtgacgtcttcgtggggcggggggggggcagcgagagcgggagagcctagagtacggacagcgccggggggagggcggagggcgcaatggtttcaaaatcatcttccgagtgaaaggctatccgagatgcacacgggaccgcaacgcccacctagagctcctcgcagcgcgcgcttggccactataacgcatgcggcaacgagaccccttaccctgggaacacttgggggggggaggctggcgtcagttccgaacctagcgggcctttcctggccggacgggggccctgcctccctgtcgaggacgagccgtctagcggccgcgacgcttgaggtccccagatacatgcgatgacctaacccaagaagatgaatcaaacggacggcgtggcagtcgaacctaagcttgaagcccccttctccctcagaactgttcgggtcgcggcagcccgctagtacctgcgcccttctggctgcccccaaccgggcccgcgccatcgccgctcctccgccggacagtggtcgccacatactcaggagcgcccggggggccgcccgtggaccggctcgtcagcctctgatctggcccccattggtaggccgtaccccggattaaccgcgcaccggtccccgaggaccgaagccaccctcccgggcacccgcgtctggtacccggccccgcggtgtatacacggctcggactcacttaacgtccggcaggcgaaggtaagcgggcccggatccgaccggcggtgcacttctcggggcttcgtgacggcttacgcgcagcgggagcgaaccgatccgcctccgtcgcgtagtcgtcgtctcgcgcgccccgccccctgcctgctccggggcaatttcggggaggggcgagcccgtcttagtgagccccagggtgtgggcgcgaaaggaagccatacattctgagttccgcgcgggcccagatgtctctgtcccgggggcaactccgtgctcgcggcggcaggcgggccagttccagctctagcagctcactcgattgcaaaatccggccccctcggcgtctatgagctacagtaggcccatgcgtcgtgttcaggcgcgccgcagtcgatcgcctccccggcgcaagggaaacctaatgtcgggtgccctgtccaactgacacggcgcccccctcaggcaccgtgtcaaaccgcagccatacggccccgcccgtacctaaggtaatcagcggaggctgccttccgcgtccagggttctagggtcgtcgcaacacgctcctgaccggccgtggggcaactcggccgagtgccctagtcggatggccgccctcagcgtagttctgggttcgtctgaacatattccaggccgctatgcggaaggaagggtagcgtagaccaagtaagcctggcgcggtgacccaatttcctgtcccagacgcgggtgttcgacgtcgagacttcaccaatggtcatcggctgcactcgaacattgagtatgggccgaacagccgaacgccatatgtaacgcgctagtgacggtgcgcgctgcagaggccatcaggcggttcggaatgtcccgctgggcccctcgcctgcaggggcgcacgacgtatctagagcgcacagctgttaggagcacagactccacgtgtcccgcgctaacgcgctccccccgatgcggcgagatgacagcggtcgtttggtctcgccactcgagtggaaggcccgccatccaacgttatcgcctgggggcggcattttggtaccttcggtcacgctcgcctgtggggccgccctgaagcggaaactgtggggcgggttgggggggtcgaggggatcttggccggccatggcgctcggtccgccgccagtgccagggcgcggcacagccccgcgtaccgggggggtggcccgccgcggttccggccctggctcgcgccccgccccgcccccggggcctctaccctagcctcgtcttgttcaccggtgggcgtttccctgatatcatcgtcgccacagcccgtctggggtgaaagtacggtaggacccgtggaagcctgccgagcacgcggttcacggcgcgcggaggagcactccctgggcgggccaactcacgcttcgcaggttgccttgggtggccccgcctcttttgggcaagccaaccgatggcggtcgggattgccatcgcagcacgggcgcccaaagcccgtgcggccgccccagtgaactgccctctcccccggaagcgcccagtgcgcgaaccggaggcggggagcaggctcccggggcccagcagcggtagcgacaggtggttaccacgccgcacaccgatggctccccatcgccgtggtccgaggcagccggctggcctcgggagcgcctcggttaaacgccctcccgccgctccgtcgcttgcgtcccccccccccagcccaattagaggggaccgtgggggcgggctgtcgctcagggaccccggcacgtcggccagcacgcgacgcccagcagccggggggacgtgcctgtcctcccgggccagttttccaactgtttggcctctgaagaagctaccgctccgCgccggcgtcgtcaaactgctcacctccaacccagttgagtctgtgcagcgccggcttcagcccccgcgcgccggggccagccgttcgtgcgctctgcgtggccgtctaagtcgcgaggcacagagggaagtgcggcgacccgtgccgtttcctttggggatcgtgtgctatcagcgttcccgcatgtcgatggagaggcaacgaagggcattgtgcgccgcctaacgcctctggcccatgtaggggtacacgggaccgcgcgcagaaagtatagttttgtacgcccgccttgtggagcaacacaaggcgagaaaggacacgccacccgaccccgtggcgtttgtcggtcagatgccggccgccctccatcgttctgattgctcgtagggtggccgcccgttcatactaccccgataggccgtaccttttaccggcaccctcctcctctcctcgatcgtcaagacgcggctcatagcagcgtggactacctcgtcgtcacgcccacgacgggcccgcgagggcgcgcgcggatccaaggacccgacgaggtggaagcactccggaagccggtacaccaccgcagggccgagagtccatcagagataggaccaaatcgcttggcggccgggatcaatcgtcgtgggggaacaaatcgggctttacggtaagacccccagtcaccgggtgcagtgaaactacgaaggggggcgcctagtcgcaagaggggatgcgatcggtgaccagcgagagagtggctcgcggggacttctcggtcgaagttgtgccttccgcccacgtccacactgccgtggacgacaccgagtcgtagtggggaccgcacccccacgcggcgtcgacgtacgctccgggccgccttcaccgttcgctgcgggatacccacgagatgcactcacgaggttcggagttgagccatcggactcccgaggcgtgcagccttggagggcattcgtagaaactgcggcgggttgctcctggcgtcacgcgcggaggccgtcgcaagaggttgtcccactaggggacggcgtggagctgggcggacggcttcggtagaagcaccgtggttgacaatacactgggccagcgctctagagcataggcactaggcgagagggccgcatcgcattagcgttagagccctaatacagcgactcaaccctgctgcgcccgtgggtggataggacgcccacacccgccgccgtacgcacggcgtcacgacctattgctcgaccatcgcgctgtgctcgacagggtcgcgcggctcccgcgcaggcggtcaattttagacactgtacgcccgacaacctttaggccccccgctcccggctggaggggggagatggtcgccggcagcattacttagaccgagtccaacgttgtcgctcggtggaggcagggcgttcgcccacgcctccggctgccccgcttcccaggtccggggggtcgtcgctctggaaccgtaggccggttctggtatagcctgctccccgtctccccgatgccgcaccaccttgacgggtcaagcggtgcccccccaccgcgggcgggcccagcttattcggccgccctgagtgtgcctcccctttactgtgtaccgaaccggcccgcccatcgggaaccaaccggcgcccgttcagtgctggcgggaggccccccccacccctccagggggtcggcggtaacgacaatgggacccaggcgaccgtccagtccgccagtcacccggggcgacgaccccggccctcatgtccggccccgtatttgctacacgccggccaaaagcaacatacggattgtgggcatcatatttgtatcacccacaggccgtcctccgttgccacgggacgcgtggatctcgttgggatcggttcgaaccgggcccccttctgaaacgcaccgtagccggcctgcgcaacgacgccacggggcggtcgccagtcgcttgtccccgggggcggtcggcgggctggtatggtaaactctatcgtcccttaagggaacagattcgctatggggcatatcagcccaggggtatgggcgcctgtttcccctcctgatctcaccccgattgcggtagcgcgcgcgcaaaggtgccacgagcttcgcggcgccactctccccccgcgccggacgaggtcgcccacaggtgctgctctaggtggatgattgtcccgggcccaggccgcggcgccatcatttgccgttctctatcctcgccccgtcctgtatgcaaccgtcccggaccttgcggggggtcacgttacccgttggtcaacggacgtcattctcttctagctttagggacagatagtgcagggttcgagccggagcgcgcgggatgcatggccgcccttcgggtggcctcagcccccccgcgtgggtgcgctggcaaccccaagcaaacccggccgcgagaacggcatcggcgcggcgttgcgtcgccttctacgcaactcgcagaggcgggatgaatgccgctgaggcgctcgcagggacccctgcacccgacttcaaacgcctgacgatgccgccccaccacccgtgaccaaacctgcacgagccccgacggctaaactctcacggtacaggatggttagtcctcaggagttgcatgcgcatcggcttgcattggtgatcccgtcgccttcaaggccccgcagttggctggggcctcgcggcagccggctacaaccccggcacggcttggcgcgggtgcccacggccagttagaggttccccgtggcacgggatcggcgggggtccggggtcgcaggggccccagtcgcagcgcctgcaacggcccactgacgcgcagcccggtcgcgcggcgagccgagtctaattcgagcggcgggatggcgttacggacgggcgtcgccataccatcctgcggtgggaaaggtgccgccgggtgccgttctagccggaccggaggaaggccgccgggccccgacttaccggttgggggcactgttcggggaacgctccacccatcatcaccaagttgattcctcggatcctcctgcggacggccgggccgcgaacgcgcccgaagtcgtccgccaacgagacgggtcgcggctatggaccggtctattgtgatccggtgattgaagaatcacaagagcggtaacgaacgcgaagcgggtttatcgcgcctcctctgctgcccccggacagtttgcctagccccggcccagccagccagttgaccgctacgatgagctataagctcacggcggccctgacgacgagtcaatacggggtgttcggcgacccttgctcagcgtccattgggcggccaagtaccagaactcttagcgcaacgcacacctcaacgccagggtgagggaaaagaccagagcacctcgcccgcgcagggtgcccgccgcggcactacggacagggggtgagctcaagaagtggctgtaggtgcggggcaggcgcgcggcactcccgagggatgctccgtgcgggggcagccgcggacggcttctgggtttcaaacatccaggcctccgcttcaacccccacggccccgccagtcatagtcctcggggggggtagggcgctaaattttttgtgtcccgcggcaggtagagattcCccaccctaaagaggctctcgcccgccgatgcccgcagggagacaggcggcacaaaagtcatgtggcaagcgccaagggttgggccccttggagggcctgcgggcggggattgagcggcagatgacagatggccgattgatggggcgccgcggccagaaagggcgcgtaggggacgctgcgcgtcacccccgaaacgagatcagcgctgggcggcgcggttgccccggatcggggtggtcccttgggcttggcccagccggcagcggcgggcagggccacacaggtacgggcactacagacgtaccctgcgatcccctcctccggtttcccccttcccatgacgcgatctgcgtcctgtctgcgccggcgcggggaggggtgtctcaccggagacccatggttcccccgctgtctcatggctatcgcaacgtcaaagtggcacagctaatgagtagggaccgaggccccggcgagacaagcgggctggaagtcgatcgctgtaggcgtcgcgaggcccaggacccacatagggggggaccagctctgcgagtagcttcaggggggccgcagaggaggccttcaccgacggcggcgcggtcgggacatgaggtagaaagccacagggagactccgcaccggagggagtgcgggctggggtcgaaaggagcgggcgaggcacgaggggcctacccaaggggcgtgcgtttgcggtaacctaaaggcccgctacctggacggggtggagcggcgcggcggccccatacgtccgggtcgcggagagggagaaggcgaccgtaggcgttgtcccgcgacacgcctcaccgatccgaacgccccgggagagccgggttggacgcgttccccgtagcggccccgcgcgaggccgcccggtgaggggcgggacgcaacgactccggccgcgacccgggctgcaccttccgccgggcccctgccgaggtgggacgtgggtcttcgaagtgtacctgaaagatcgcgagcggggcgctaggctgcggatccctccctcgcgatacccggccaagccccgtgcccgggtgggggtgggttatctgcgcggtgtctgcccgcccaggcgcgccgcgttaacgaacgggaggaccagcgcggaatcgtcgtttccgagcccgcacgcccagggagtgaccggcactgcggggggccgctggcgctcattcggccgatgcggctcggcgcatagctccctgctatctactagtgatgtatggcccgccccggggggaggcgcggtgggtctccgacgccgctttgccgccggataggggaaggaagacgccctgagaataactcaccgcaccccctccgggcggtcgagcgtgacgcgtgccagtcacccgcacaggcagggcacggtcagaccaggttccgtggggaggggtcgggggtagaggccgatgcacgggacgaccgcgtgaggttggaccgagtgaggttgagtcgtcgcgcgctcccggacgggcggcgcgcgccagtgctcgagtctagcctgtggggtactctgcgcagggttaattgcgctggcagcccagtcagttcgccttgagttatctgtcccctttcgcgatctcatgcggtgggcaattcgtctacggcccttcccaggctactgcacggcccatgctcgtttaggatcttcagccgcgccgggccgggagggtatgagccctggtgatgccgacatcccccgagatgctcatcccctcgtggcgccctggcaggtggacttgggatggccccatacgtacggacgactggctgctgcgggacatggtgccaatgggaccgctagtccggggggtatccccaatgccccttgcacgcactttcgggcggtggcggttcgcgtgagcggggaaacgcaccagggaagctgtacccggggccggagtcgagcgaagccgctggccaagactgatttctccggcggtaacgcaacccctggttatctattcacggtgtgacccgagccgacccccaatctctaacccgataatgcggtaggacgtttccggtaagggccgctttacggagggttaggcttctcaccccgccgcattcccgataggggccccaggcccaaccgaccggcgccctcccgccaacatcacaggggcagggggctggaacccctcggcgccccacggcgcccacaggcgtgtcagcatccgccctgaggcaaggcttcttgtgccagcgcaggcgtccacctacacgaaaggaggtctaatggtaggtccccgaatggtgagcgctggcggggctggggagtctcggcagcgcccgccccaccgcgcaggcgcgcttaccctccctggtagcctgatctgtccctgcacccagggtggtagcggctcacctcgcagggcccgggctatgcctcaccgaacggtcccgaagcctatcttccccgttgtggtgccgcctcgatcctcgaaccgcgtttagctctggacgctctgaggatcgaggcggcgcgtttaagaaaaacacctcgtgtacaatgtgtccccgccgcagagctatggaaacacgtggacagtccgagagttgcgggtctagcaggaggggcgccagcaggactgccacacagtcgcgatgtagtcagggaacagacaccgtctcattgtgaccgaccgattgctcagcagcgctggaggcgccgccgccgcccacccggcccccccggaaccgggctcgacgaccattcttcgtgtgccgaccggtcgcttaccacgcgttggtacacggtcactcctctttcgctacacgaaaaatctagcaccaagctgggacgggCcgtgggggctggcccagctgtcccctcggttgttgtgaacgagtccgcggacgtctcggctagctcttcgcgttcgtctactatacatcacaagacaccatggcccttcgagagtcctgagggtgacgagcgcggccggcgcgtcccgtcccaacctgagtggagccccgtagagggcgacgggctggcacccaccccaaacgttcgtcctggcctgtagcccaagggttgatgagagggctctggcggcaggcggttgatcgcgtggctgcgcgtacgactctcttctacgctccaaagccacattctgacagaggcctcggtgcagccgtcggctccgtaggaactcacccgtctcccgtgtccctgtgcgtcgctaagagagcccttttgctggccgctttgcctcgcctacaggcaggtggcggccgggggtgggacagggtccgccggaccccggtcccagtaggcctgaggtgggactcacctcgacccattcggtcatggaaggacgctccgtttcactttactatcaagggcggatcgctaggctccggagagcctcgcgggggggcgtaggggcggggtccgaatgggtcgatgagtgagcagcccccctctcgcgcgcttgggaggccgtgtctcatagggtggccaccatgagctcacgtgcaccccctgtctcgctttgcatccctggtacagccgcacttgggctcggcgaagcagtaccggtcgtaatgggctagctgacagtgaacgcctccctagtgccgcacaatagtcataacctcaacccgcaaattgagagcgtgtaccagctcacgatgagtgaggacctgcaggtatagtctgacagtcgggtggactcgcggacggcggcattgtggcggacctgatgctcccgcgtgctggcccagcgtgcactgccccggcggacctccgaccgcaccagtagagttcgggctaagcccccaatccttccactgtctgcaagacgcgcgcgcttggcgatacccggggggggagcgcaacggtccaagggcggcgggctgctgggccggcggcgcggcggggcacacgggggggcggctgagaccgtttcgtggctggccaggctgcagctcccaaagggcgtcagggggcatccccgggcgggagaggccgcgacttctgatagtgggtgccctatgctggtgaactatggccgttgctctgtcccagggcccaggatggcgggaggtacatgtgcagcaagcacgccggaccacgtcaggcgagagaggcgtagggaaacggcggggaggacgttttcgaggggggggccggtgctcgccacggggggctgaacaccagtgaaagtgccatcccggtgctgaccctctcgccgccgatgccgccaaaccccaaagattaGcctccctaaatcatcgtgggcacgcggtcgagcaaaggggcgggcttgtagctagactccagcctcgttcgcgtctcgttctcccttcgagggccttgccagggtccaccagaatcatctcctggctcctttgtagacggcgcttattgttcgcccggagttggcggaggacgggcaagtggcgtggccccctactagtcactgtgtagttcgccttacccactccgtcgctaacgccgctgggcgagtcggatgctgtggaggcagcaatacgggtctaaggcccactacacgaacccggaacggcacaggattgtgcgagatcgggccagccgccattcagccctatacaataatacccccgagggggggggggccgctaagaataggcgccaccgcggctcttggccgcacgcccgtccaatgtgcttacgtgttgcccgacccgtcccggttcttagtgaggcagccggacgaggtagacctcgagcgcgtgggcagggcgaaaatcggcataccatgggggaaacgaccagcagctgttgcccgaggggaggacatcaacgtagccggaatgccggggaggccgcgacgggcagaccgatgcccagcgcgtgaccaacacaatcttcggagagtctccagacccgctgattccgaaaccctccctaatagccctcacgcagagttcatgctgagcgggctcgcctcaacagcacgtgggaacacgccgggcctagccgaacttgtatcgtggggccacgccgtcctaagcgccggcattcgctctcttttagcatcggagcctctacggcgcctcgtgctgcggcgtcgaccgctctgtttagtccgcacggggggatgcggcagcgcggtaagctccgttgcccgtgggcgctgttcagatacaactggcactttgacccgcggtcatggtttggaactgaggtcagcctcctccagggcgccccggcgataaagatcccactagaacttgctgctagtattgttccctgctgggccaaaggcagcctccagagcacacatgcgactgtgaaaggtgagcggcgctgccgaggctgcccctccacccggatgaagtcaaagcccgagcggggcggcccagcggtgcacgccggagcgctgagaatatatgcagccacgtgccgcacatgtcgctccgggcccggttgctcctcttcaagcgtagcgctaccggccgggaccgggcggaacgatacctcccattagcggcccagtggcgggagccgcggtcggaacgccgtagtgatctcggtccgccacgttcgggcagctcgaaacctcttactttacaactccggaggcgtagcgattcaagggacttctctagcgcgcctgcgcctttcccactatacgtggcagtcagcgggcaggcccgcttggctgcatgcgactccgttgaaacaccctcgtcagtccacgtcgggggccgacaacgccgctaaactcacagcctccctgaggctgctatgcacacttacctcgcaccgtctcgacgcctagattgcacccaacctggtacacctcggcccgttctacgggcgcgggccgttggggggcccccccaggtcagtgccagcttcaggttccacgcagactttagcacccggatctgggagatggaagagtccacacgttacacatgaataaccctgatttgcgggtgttgtccaacgcgtccggcacattccgagccgccgcgcttcgcgggcctacggctcaaaactggaccgtgcgtggggagagccgtacccgccgcgtgcgcaccggggccgatcaacgttcggggcgggggtgaactagtgggtgaagagtcctcgcctcgcaggggggcacctctagcaacggccggcgcgccgcagatttcagtggacgtccccgccactgagaccagttactacggccttaccttctcggttgtctggcgcccccgccatttgcgcgtcgcgatcttaacaccggctaagtcctgccaagaggtctaaggcaggcctaagtgggtccgcgggcttcactatagccgttcttcgctgcaggccgtcgtaggggatccctcggcacgtcccgttgatccgtgctgtctgacgacgaggcaatggctaacgaccgaactcctctggcaccccaagggtggtgcggcgcgatcactcgccatgtaacgcgtcctctccactgtcgcaggcgcgcttgccgaggtccgctgcggtccccatgcgggcgagactcctgggcagggggccggaaaacatggcgatagcgccgtaaggcaagccgggtcagccaaacagcatagtagcgaacctagatacggtgagggaggggggggccgctcaccaaagcggcgagcggcggtgtggcggcgaccagccctgtttgcctagttttcaacactggcctcctggcggtggcaagacgccgcgcgcagcgtacatgcccaagtcatgcggaacataccgagctcgctcttttccctcagccgccctcggggtaggggccctccttgtacgtgctggcacgatgtcccggtatcgggtccgcaacctccctgggagattgacggagcagatcgatacgggccattccagctggtacccagccaatgagcctgcggcggggattctgccggtgaggccggctgctatgtcgtcccggcccctcccacgtattggcccccgcaggcaatagggagtcccccctgccaccctaacatctttctactgcctcggcgacagtcgtCgcgtgagcggtcgcgacgccgtcaccatacagggagcggcttaacgggcacgtacgcgcccgtactacccgcggccgccagccggccacaggaagtgccgaaactccgcggtcctccgaggaacgcggcccgcggccccatggagggggggggaaggggatgtcggcacaagtgccatggaggtgcgggactttgagtcctgacgcgcggctagctcctgatccgccggctggtcacgtggctgccaggtcacctcagatccggggtgtcctccagcaggcgcccaccccggtctcggagggcctcccgacggggccgcgctccggccgcggtagggtccgggcccccccccttacccgcccgataaggcacgctcccaaattcctggacccgtccgggcattatgcatagtcagcgctacactcccaacggggtgtgcggggcctctccgccgccccagtcgcaggagacgatgcaaaggatctgtcccggtcggccgtcgagcgaaacaaccgggggaatcgaaaagcgacggtcgcgggggcgccgccgaatgccgagcgcgattggcagacgaccggggtgaagttccggggtcgcgcaattactaaccccaagggatccccgggggccgagggccgcacggtggtcccagatttgtagagttcggtgcagcgggatacagcgcgggcggaatgcgtagcctgggtgttccccgaaacgggctggggtcgccgtcgtgacgcgggggcgccccgctccggaggggagcgtagagagtgaggctaagacctacgaaagagtgcccctggctagaggtaagagccttatgcctcgggtccggcgacgcatggcgtctgctgcacaggcggggcacgtgaaccgactaacagtttcccggctgattgcctcggcccaaacgctcgctcccacggtcggcctagtgaaccccaccctgtccgttcggacaattgcgcggacactgaacagtccagggactcgggccggtccgggtcggcaattggtttctaagtcggtggcggcctagacctccggacgaccgggaagcgcgtctgctagagggcggggcgcggcggcggaagtgggtgtggcgaggaccacagtccctcaccgtcgaagcttcatcgtgtatgcgcctccgaactgagcgtaaatagcacagtctgtcctgtgagcccgcccggtccgcactcgccccctcgcgacccctctactgctacctctagctcgaccgctaggccggtctcctagctcccgctcactagtcccggtctgtcgttggggtgggtcggggtggcctgcgtgctggcgggtcgacccacctgcaggccgtatctgtgtctcgatcgcccgggcataggctggcgcccgagccgctatcacggctccatgccactatatcgggatggcccggggctcactatcattcacagagacccgcggctcaaggtatcgtcgttagtgtgcacgcgtcccgaggccgccggacgctcagcgtctgagatccgggtcgcggggcctatatcgacgcgctgagagactagcagcgccccatcaacgaggcctgaagctttcgttgtcccacgtacttggcgtttagttattgggctggccccacaatagaagcctcataccgtggctgaacgcccctggtgctcctctccgcgtccatcctctcggggattctaccgcctcgttaccactgactcgacagacatggaacgaaaatggcctcgtatggcaccggtaggggcccgcatatgggcttctccccctgagcgtctgccccccccgcgagcggcctgacggaaaggcagggccatcgggaggcgggagctcggactcccctaggtatggccgagcgacccatgtgtttgcaccgagcaacaacagcgaaccgcgaggcggactcgtgggcgcgggccagccccgtcgccggggctgcagcagctcgggcgcggtagcctgcgctcctcgcgtcgatctacgacggtccgggttgagcgagacccaaaacgtggggtagaagtgtcaatagaagcacaccgtccccccatcgcaggggggttcacgggcctctagtcagaatcagaatgcctctgtgcaatggccggactcggcccgtggagtctcccctggcgcagtcgggaccgcgggtcccattccagctctttcgctaatcgcatgacgggaccgtttagggcggggggaaccgccaacagcgcccactaccagctagggtgagcgaacgaacagccgaggcgccccggctgtgggccgggagcgctagattttaggaccggaggactccgagcggtcggccactgtcatctcgcgacccgtacttgtggtagccttgggccgcccggaacggcctgaacacccgaccagtgtggacgctcgctcctgtcgcctatcccagccccgccgacccggcccagcgggccacgttagctcccatcgaccggccctgacaccgcgtcccatggcctgattgaattactcgtgggccgagtcgactgcgacgtgagctcgtaccccccctagttaggataccccggatgttacgccgatgtgcgccataatcgcgctatcgcagggtgcaggcagctgagacgtaggccgctcccccaagaacggcgcctgtacgtcgaggcggcctcgggctacaccagtatgcctggccccggctcaggccgcgctgcgacctcgggattcagggtgggcatgtccccgctagaccgggggacgcgtggatctaatgagtactgctcggctgagtcgaggcacaatcgggtacgcctgggcgtcggccaccgaacctctagagctggggtgggtcctagcccgcggttaggtgcgatgtggtccatcacccccctggctattttatggggctcgcccatgcctcccagccgcgcttccgatgccggcccctccagcaggatggggtacgggtggcttacgccgtgcgccgcgggtccgggcggtggggccgaatgcgcgcgggtcccgtggtcccagctcccgggcggatcgtcctcctctctcacaaggcgtcccgagccggtggtcgccacgtgagcgctccccactggccaaacctagcgtgctgccgtctgcgtcacgggatacaccgatcgaatgtttagacgtgccggcccgcctgttccgcgaggtccgctaaacgggccatgatgcggaggggcggttcggggcgctggccgagccacaaccaccatgcccctcaggccgggcggcgctccggggctcgccggcgggcgtgacgctgaccggaagaggccgaggcagggacaacggtgagagcgtctggagtgcggacggtaccggcatcgtagtaccttgaagcacagcccagatcacgacgcaactaagcggcgtgccgggtacacctgcgtatagtcctccgcacggagctcctggtgacgtggcagagctaagcagtagcatcagcgtgaagacccggggagatataacccgcggtgagcaggattccaagttagcacagcagcgcgcctacgggtaggatgagatgccccccacaagtttgtcggtcgaggcctcacattcctcaatgggccgtgcggcgaggcggacgctccgtggcgccgtgagggatcaccaaataagtcagcccgttatcccctcttcctgtagaggccacgagccatcagagggcagaacgtaattgtgaaactggctgcgggggacagcacaccctaacctcggcgagccaacttcggaactgataggcattgccgtgtagggataaatagggggcgagggagggtccccgcgactaggcaatagcggaccggaccaatccttcgatggtgcggcgtcgcttggaggcctaactgtttacggcactcaccatcggaagggcgccgtcttcgaagggcacacccccacgtctcgcagcatgcagcctgttgtgttgaccggaggcgccgcccgtgcctgcgcggaggtgcgcgagcctgttctatagtccaaactggacagcaattcgctgcgtaactttcccagcgcctgcggggacgcggtccttcttgcctgacgccagctgtaatagggggccgaaaaatcccccaacggttgtgcctggttgaacatccaatgattctagcgcagatatgcaatccctttaaagc
>trimmed.Xcm4392.SRR494498
cgcaaagcaggtttacgtatagTtagtgggagacgtgtaacaggcctgacacccCtgggagttacaacccacaccggcacaaggcagagggagtCtctgtgtgGgagccggccgtgtcatcccggctacgcgcccgggaagccggtgccgcccgtgGggcaacagggcatgccagcaccatccggaagcgacggtcgtgtcacctggtagtgaaagtgcgtatcaatgtagtccaccctgtccgtgctagggcgcgaccccccccgcgtcgaggcgcagtgcccaacgagtccgctCacccaaagtggcccagaccccgccctcgctgggcgagtggtgcggcgcgggtcagaggggctgacgccgcggtgcgtcagaggcggcactcaccgggctgtggtcgggctacccgtccccgtcgctctcggcgctacaaggggagtacgccccgctcgccgcgcccggcatgaccgcaagccaaatcAgcgcggagtgacattgggcaccccgaggcagccagagcttgtgaccggggcgggccgaacgtggacggggggggaacggggggcaacgtcgaaggaggcgggccacagggggcaagcggggctcccgcccccgtacccacgccagtagggagaattgcgttgcaacgtttcgcccctggtgcgcgcAtctcgactgctgccgtcgtcgtgggcaagagacagtcggcagtcgagggtcgcaccggcggtcttccgctcatggccgcgccctagcgcgcatgaggcgcgcGtgggctaacgtagctcgtcttaaccgggGcctacggtcAgtgagctgtgcgtctggaccgctcggaaacgccggtctctggaggctaccccgggtggccacctgccccgtgggGgcccgcctgcccgaggcccgtccgggcgcccacccgcgcgggcgcacgcgttacggctgacgcccctcgccgtccggcgctgcccgggggcaagcctttggtctcagcccccctcagcacgagcAcgcagccggacaaaaacaactaggccgcagacgcatccgaccggtactcttgagagtgccccccccgcgcctggtcgccactgctccccccgctagcgcctccggaggcttagccttggcggttcgcgcgcctcgaaaagagtgtgtcccgcgtctctgtgcgtgagaaattacgttgcttggtcctcgttactacgtaggcgttgggatgcaaggccctatctccggagcacaaccgcatagcctgaacttcccaccaatacctattccgccgctatacctcccagagccggcccgccctcaccttgagcctgtgctgacgaactcgacccctggtgtccggagccgacagttgatcgttggccaccgagctgttaaccgatgcagcgctccgatgcctggccttctacggccgaccacacaacaaaaaaggggcagctgcggggttgaggggcgggcgccctgccaacgggcccgcggtccgcCtgggctaggagggtgagatccggatctcgccccgcctgttctagcaccgccgtacaccctcggctgcctggcgaccatgtgccccatccggaaggatactccatactcctgccgttaggagaagttcacgcgttccgcgcctccggggcaggcgctcggcaggccatcggaccgcctccccgcacttgggcgcgcctccgccatagggtttcccggcaaatggacagccggcaatcgcttgcagaggcagcaggcaggcacgcggtcggccacccgggccctggaagcccaccgcagcgactcttcgggctacccggggtggtgtcggatgcgtggcgccgtgcgaggggttggtgggtacgtcgacctacactgtcggacttgggtgctgccatcgtagcccgcgtggagctgcgcccctggacgctgtgagtccgCtcgcggtccccgccacccgcccggattaccgcaggtaaaaacgtgcggcgcgcgcccatacgacgggggcgggccactccgccggcacccggaaggctgtgtgacccaacgaagatggaattatgtcgtgttccacccgtggtctgcaacgttcggacgggcccgcccgaggattgttggctccaaggagtcgaactaccgcacacactgctgaacattatgtgcggaggccgcatgacccctcggttcagttgggcCcccgagtggtagaagggggctaatcaaagctggtggcccgaggttgagcctggggaaaaggcacgcgggtacagccccagacacaattggcagaaaagagctcgctcggcgcgtccgctgtacccccgcgccgtttttcccggcgcttcttcgcccccccgtcggccactagaaggccacggtcccggatttgtattcctccctgtgctggcctttggcccctgcgggggcaaggtaccagaccacgcggcgagtataactacagacataccctcgtggccgcgtctcgggccgccccgacctttCGgtgggggccactccgatcgccccaaatgtttgcccgccggccggtaactatcgcgctagagggcgctgtggacactttcccaccaGtgggagtgaTggtcattccCcgcccgAgGttacatgaggccccccgtcaggacgggcgccgcgcgatgggcgtccccacgagcaccagggcgaggtgtaggtggggactcccaggggtgccgcgggccccaaccgaagtagcagggcgcgtgcggggttcacagagcggttgggtggccgctttggcgtacccccgccggtccaccatttagcgcggtcgccgcccgctacggggccggggcacccggtgcctttcctcccgcatcgaactatgttgcgGaggtaactgCctgcgaagggtcatcccctccgcttatgggttgtgccccgggtcgttcacggcggtgtcgcgtggcgcgggctcccagcggaccgccgCcggagcacagttgcccaacgcagccgcgcgcctacttacggggggggccggagacggcttcttctcgcagccggcgctaagtaggtggcggcatcgcgcgcttacacggttgtcttTgccatgaggaggaccggccgcctacgcggctgtttacggtggtggcgggccccccaaggcatgggcgcagctggcgccggccggtgcgacagagtggctgcgaactgtcatgggtaccggggcgtggagcagaagcccgaggcaaacgccagGccgcggccggtGaacccggtacacaccacgctacgaatcgtgatggcggctcgccgggtggatctaccccgcacgccttaggttggagcgggctagccagccgtcgggcggatgccaccgccaaggcggggccccgaccgggtgagcaaccgcacatagcccttcaggacaagcgcctacccccgcccccctacccatcctcgccgatctcgcaccgagttgtgcctaagctagcgaaatcttgaccgggttgtccggccccggcctgagccatgcgaactcggagctcgggaccccacgccctctctcgcAtattttgcctccccccctcggggcggctgtgcccggtgattcaactagtctccgtagacccctggcgtactgcggggcccccccggggggactgttccggacgcgaatcgcttcacgagcctgtgtccgcactgggcgccatccgggccgctgggcggtcgacctgtggtttatggacccctctgatggccgctcccgttacgagaagcagcggccgggtGgcgtgtccagtaataccccatcgcttacgcagcttgCacccgttaggaccaactatacgcgcgggctcaacgcgcccctgaccccgactgcggaacatctgagcgctgaaacgccccgcccgacacgGagcgggctgcgcccagccgacgagacagaatgtcggttttgaaagtgcaggcctggccgtgctcgtcccgcccgcgcccctgcgtgTggaacgctgtgccaacggccagctcccgcgggtggtcctCgccccaaggtgacatggcgctccggcctgccgggtggggcaccgggggaccgcagaagccgcgtggcacgggatttgctcctgccaacttgacacggagggcgccctccgtcgctcggcggggggtttccccgacgccctgcaaccggattgtgacagtaaatttgttcgtttacattcgggaccggagtattgcctgagacggggattgacaaggagacgtttccatacccaatcgccccacggcgggggcaacgaAGctgggccactgtcgccccgcacccgccgttggccgaggggggcggggaccccggaaagccgtctgggcggaccccgggcaccgggggggaacgcGcggcgatcagacggcccggctttcttccgccaattcgagggtttgaaggccgaatgagcctggtcggacccagatggtaagggcgagaggggggaaaccgcgtaggctcgGaccctgccggcttaggaagtggaagcaacgaccgcgccggcgcgtacgcctctacgcgactccggctcacagccgtccgcaagggcccagcgtcatTacCagcgccgtcgggtaaggccagccgtacgccgcaagggGttggcctccctattgcgggcattagtcggcccgtgcttgcgtcccctacgcgaatcagtggaatccacctaaaagtagcctacttcctcCagcgaggtctagccggactgcggaggtcgaatcgtcctaccccgcgaaaccggccgcaacggcagctactctcaagatgcggaggcattggccgggtgcccgggcgtacCgcAtggaggcgacgcaggcggcctctagcggttgcggcccgtcgcgtccaccaccgcgctAaggagccggcgggcgcctagcgccacgaggagggtagcgggcccttgggGttcggcgccggccaccagcgccttagtgtaggccgcggcgcggcctgtccctgcgcgttccccagggcttcccatccccgcgcgtgggtcggggccagggggtgccgttgccgtggtaagtgcggcaccggcattggggcccaatctcgcgacagctctgcgggtagtactccaccctatcgcagccaatttagtccgtcatagtggctatcgtgcgctgcgggcccctggctgccggttagcgccggagggctaccccccggaccggGccgccccccacaacattacgttgcgccggtggcgcggaggcccgccggggggtctggcccgcggtacaaaggatggccacctgcgaaaactgggtcccgattccccccttcttagtgaggctcgtagagcctggtcgcccctggctatgggtcaactcgggggatacctccggcgccggacgctcgccgcgcccccgaagtgccggaggtccgctggccctctagcgggcctagggcctgaatccgggcgccgccgcgaccccgagcacaaccccccagagcatcaacggccgcggttactgctggggacgcgattcacccaggagaagaccgtcccgcagctacgtgatcctaagctgagaagcctcgtgccccggccccAgtcccggtcgcgtcaggataccgcgctgactgccgaaatctagacgcggagcctcaggAtcttgacgaccgcgggggttaccccttggccgcgccacattctgtgtcgaaacgtcgtgacgtcttcgtggggcggggggggggcagcgagagcgggagagcctagagtacggacagcgccggggggagggcggagggcgcaatggtttcaaaatcatcttccgagtgaaaggctatccgagatgcacacgggaccgcaacgcccacctagagctcctcgcCgcgcgcgcttggccactataacgcatgcggcGacgagaccccttaccctgggaacacttgggggggggaggctggcgtcagttccgaacctagcgggcctttcctggccggacgggggccctgcctccctgtcgaggacgagccgtctagcggccgcgacgcttgaggtccccagatacatgcgatgacctaacccaagaagGtgaatcaCacggacggcgtggcagtcgaacctaagcttgaagcccccttctccctcagaactgttcgggtcgcggcagcccgctagtacGtgcgcccttctggctgcccccaaccgggcccgcgccatcgccgctcctccgccggacagtggtcgccacatactcaggagcgcccggggggccgcccgtggaccggctcgtcagcctctgatctggcccccattggtaggccgtaccccggattaaccgcgcaccggtccccgaggaccgaagccaccctcccgggcacccgcgtctggtacccggccccgcggtgtatacacggctcgAactcacttaacgCccggcaggcgaaggtaagcgggcccggatccgaccggcggtgcacttctcggggcttcgtgacggcttacgcgcagcgggagcgaaccgatccgcctccgtcgcgtagtcgtcgtctcgcgcgccccgccccctgcctgctccggggcaatttcggggaggggcgagcccgtcttagtgagccccagggtgtgggcgcgaaaggaagccatacCttctgagttccgcgcgggcccaAatgtctctgtcccgggggcaactccgtgctcgcggcggcaggcgggccagttccagctctagcagctcactcgattgcaaaatccggccccctcAgcgtctatgagctacagtaggcccatgcgtcgtgttcaggcgcgccgcagtcgatcgcctccccggcgcaagggaaacctaatgtcgggtgccctgtccaactgacacggcgcccccctcaggcaccgtgtcaaaccgcagccatacggccccgcccgtacctaaggtaatcagcggaggctgccttccgcgtccagggttctagggtcgtcgcaacacgctcctgaccggccgtggggcaactcggccAagtgccctagtcggatggccgccctcagcgtagttctgggttcgtctgaacatattccaggccgctatgcggaaggaagggtagcgtagaccaagtaagcctggcgcggtgacccaatttcctgtcccagacgcgggtgttcgacgtcgagacttcaccaatggtcatcggctgcactcgaacattgagtatgggccgaacagcGgaacgccatatgtaacgcgctagtgacggtgcgcgctgcagaggccaCcaggcggttcggaatgtcccgctgggcccctcgcctgcaggggcgcacgacgtatctagagcgcacagctgttaggagcacagactccacgtgtcccgcgctaacgcgctccccccgatgcggcgagatgacagcggtcgtttggtctcgccactcgCgtggaaggcccgccatccaacgttatcgcctgggggcggcattttggtaccttcggtcacgctcgcctgtggggccgccctgaagcggaaactgtggggcgggttgggggggtcgaggggatcttggccggccatggcgctcggtccgccgccagtgccagggcgcggcacagccccgcgtaccgggggggtggcccgccgcggttccggccctggctcgcgccccgccccgcccccggggcctctaccctagcctcgtcttgttcaccggtgggcgtttccctgatatcatcgtcgccacagcccgtctggggtgaaagtacggtaggacccgtggaagcctgccgagcacgcggttcacggcgcgcggaggagcactccctgggcgggccaactcacgcttcgcaggttgccttgggtggccccgcctcttttgggcaagccaaccgatggcggtcgggattgccatcgcagcacgggcgcccaaagcccgtgcggccgccccagtgaactgccctctcccccggaagcgcccagtgcgcgaaccggaggcggggagcaggctcccggggcccCgcagcggtagcgacaggtggttaccacgccgcacaccgatggctccccatcgccgtggtccgaggcagccggctggcctcgggagcgcctcggttaaacgccctcccgccgctccgtcgcttgcgtcccccccccccagcccaattagaggggaccgtgggggcgggctgtcgctcagggaccccggcacgtcggccagcacgcgacgcccagcagccggggggacgtgcctgtcctcccgggccagttttccaactgtttggcctctgaagaagctaccgctccgCgccggcgtcgtcaaactgctcacctccaacccagttgagtctgtgcagcgccggcttcagcccccgcgcgccggggccagccgttcgtgcgctctgcgtggccgtctaagtcgcgaggcacagagggaagtgcggcgacccgtgccgtttcctttggggatcgtgtgctatcagcgttcccgcatgtcgatggagaggcGacgaagggcattgtgcgccgcctaacgcctctggcccatgtaggggtacacgggaccgcgcgcagaaagtatagttttgtacgcccgccttgtggagcaacacaaggcgagaaaggacacgccacccgaccccgtggcgtttgtcggtcagatgccggccgccctccatcgttctgattgctcgtagggtggccgcccgttcatacCaccccgataggccgtaccttttaccggcaccctcctcctctcctcgatcgtcaagacgcggctcaCagcagcgtggactacctcgtcgtcacgcccacgacgggcccgcgagggcgcgcgcggatccaaggacccgacgaggtggaagcactccggaagccggtacaccaccgcagggccgagagtccatcagagatGggaccaaatcgcttggcggccgggatcaatcgtcgtgggggaacaaGCAgggctttacggtaagacccccagtcaccgggtgcagtgaaactacgaaggggggcgcctagtcgcaGgaggggatgcgatcggtgaccagcgagagagtggctcgTggggacttctcggtcgaagttgtgccttccgcccacgtccacactgccgtggacgacaccgagtcgtagtggggaccgcacccccacgcggcgtcgacgtacgctccgggccgccttcaccgttcgctgcgggatacccGcgagatgcactcCcgaggttcggagttgagccatcggactcccgaggcgtgcagccttggagggcattcgtagaaactgcggcgggttgctcctggcgtcacgcgcggaggccgCcgcaagaggttgtcccactaggggacggcgtggagctgggcggacggcttcggtagaagcaccgtggttgacaatacactgggccagcgctctagaAcataggcactaggcgagagggccgcatcgcattagcgttagagccctaatacagcgactcaaccctgctgcgcccgtgggtggataggacgcccacacccgccgccgtacgcacggcgtcacgacctattgctcgaccatcgcgctgtgctcgacagggtcgcgcggctcccgcgcaggcggtcaattttagacactgtacgcccgacaacctttaggccccccgctcccggctggaggggggagatggtcgccggcagcattacttagaccgagtccaacgttgtcgctcggtggaggcagggcgttcgcccacgcctccggctgccccgcttcccaggtccggggggtcgtcgctctggaaccgtaggccggttctggtatagcctgctccccgtctccccgatgccgcaccaccttgacgggtcaagcggtgcccccccaccgcgggcgggcccagcttattcggccgccctgagtgtgcctcccctttactgtgtaccgGaccggcccgcccatcgggaaccaaccggcgcccgttcagtgctggcgggaggccccccccacccctccagggggtcggcggtaacgacaatgggacccaggcgaccgtccagtccgccagCcacccggggcgacgaccccggccctTatgtccggccccgtattCgctacacgccggccaaaagcaacatacggattCtgggcatcatatttgtatcacccacaggccgtcctccgttgccacgggacgcgtggatctcgttgggatcggttcgaaccgggcccccttctgaaacgcaccgtagccggcctgcgcaacgacgccacggggcggtcgccagtcgcttgtccccgggggcggtcggcgggctggtatggtaaactctatcgtcccttGagggaacagattcgctGtggggcatatcagcccaggggtatgggcgcctgtttcccctcctgatctcaccccgattgcggtagcgcgcgcgcaaaggtgccacgagcttcgcggcgccactctccccccgcgccggacgaggtcgcccacaggtgctgctctaggtggatgattgtcccgggcccaggccgcggcgccatcatttgccgttctctatcctcgccccgtcctgtatgcaaccgtcccggaccttgcggggggtcacgttacccgttggtcaacggacgtcattctcttctagctttagggacagatagtgcGgggttcgagccggagcgcgcgggatgcatggccgcccttcgggtggcctcagcccccccgcgtgggtgcgctggcaaccccaagcaaacccggccgcgagaacggcatcggcgcggcgttgcgtcgccttctacgcaactcgcagaggcgggatAaatgccgctgaggcgctcgcagggacccctgcacccgacttcaaacgcctgacgatgccgccccaccacccgtgaccaaacctgcacgagccccgacggctaaaAtctcacggtacaggatggttagtcctcaggagttgcatgcgcatcggcttgcaGtggtgatcccgtcgccttcaaggccccgcagttggctggggcctcgcggcagccggctacaaccccggcacggcttggcgcgggtgcccacggccagttagaggttccccgtggcacgggatcggcgggggtccggggtcgcaggggccccagtcgcagcgcctgcaacggcccactgacgcgcagcccggtcgcgcggcgGgccgagtctaGttcgagcggcgggatggcgttacggacgggcgtcgccataccatcctgcggtgggaaaggtgccgccgggtgccgttctagccggaccggaggaaggccgccgggccccgacttaccggttgggggcactgtCcggggaacgctccacccatcatcaccaagttAattcctcggatcctcctgcggacggccgggccgcCaacgcgcccgaagtcgtccgccaacgagacgggtcgcggctatggaccggtctattgtgatccggtgattgaagaatcacaagagcggtaacgaacgcgaagcgggtttatcgcgcctcctctgctgcccccggacagttCgcctagccccggcccagccagccagttgaccgcAacgatgagctataagctcacggcggccctgacgacgagtcaatacggggtgttcggcgacccttgctcagcgtccCttgggcggccTagtaccagaactcttagcgcaacgcacacctcaacgccagggtgagggaaaagaccagagcacctcgcccgcgcagggtgcccgccgcggcactacggacagggggtgagctcaagaagtggctgtaggtgcggggcaggcgcgcggcactcccgagggatgctccgtgcgggggcagccgcggacggcttctgggtttcaaacatccaggcTtccgcttcaacccccacggccccgccagtcatagtcctcggggggggtagggcgctGGGGCttttgtgtcccgcggcaggtagagattcCccaccctaaagaggctctcgcccgccgatgcccgcagggagacaggcggcacaaaagtcatgtggcaagcgccGagggttgggccccttggagggcctgcgggcggggattgagcggcagatgacagatggccgattgatggggcgccgcggccagaaagggcgcgtaggggacgctgcgcgtcacccccgaaacgagatcagcgctgggcggcgcggttgccccggatcggggtggtcccttgggcttggcccagccggcagcggcgggcagggccacCcaggtacgggcactacagacgtaccctgcgatcccctcctccggtttcccccttcccatgacgcgatctgcgtcctgtctgcgccggcgcggggaggggtgtctcaccggagacccatggttcccccgctgtctcatggctatcgAaacgtcaaagtggcacCgctaatgagtagggaccgaggccccggcgagacaagcgggctggaagtcgatcgctgtaggcgtcgcgaggcccaggacccacatagggggggacAagctctgcgagtagcttcaggggggccAcagaggaggccttcaccgacggcggcgcggtcgggacatgaggtagaaagccacagggagactccgcaccggagggagtgcgggctggggtcgaaaggagcgggcgaggcacgaggggcctacccaaggggcgtgcgtttgcggtaacctaaaggcccgctacctggacggggtggagcggcgcggcggccccatacgtccgggtcgcggagagggagaaggcgaccgtaggcgttgtcccgcgacacgcctcaccgatccgaacgccccgggagagccgggttggacgcgttccccgtagcggccccgcgcgaggccgcccggtgaggggcgggacgcaacgactccggccgcgacccgggctgcaccttccgccgggcccctgccgaggtgggacgtgggtcttcgaagtgtacctgaaaTatcgcgagcggggcgctaggctgcggatccctccctcgcgatacccggccaagccccgtgcccgggtgggggtgggttatctgcgcggtgtctgcccgcccaggcgcgccgcgttaacgaacgggaggaccagcgcggaatcgtcgtttccgagcccgcacgcccagggagtgaccggcactgcggggggccgctggcgctcattcggccgatgcggcCcggcgcatagctccctgctatctactagtgatgtatggcccgccccggggggaggcgcggtgggtctTcgacgccgctttgccgccggataggggaaggaagacgccctgagaataactcaccgcaccccctccgggcggtcgagcgtgacgcgtgccagtcGcccgcacaggcagggcacggtcagaccaggttccgtggggaggggtcgggggtagaggccgatgcacgggGcgaccgcgtgaggttggaccgagtgaggttgagtcgtcgcgcgctcccggacgggcggcgcgcgccagtgctcgagtctagcctgtggggtactctgcgcagggttaattgcgctggcagcccagtcagttcgccttgagttatctgtcccctttcgcgatctcatgcggtgggcaattcgtctacggcccttcccaggctactgcacggcccatgctcgtttaggatctCcagccgcgccgggccgggagggtatgagccctggtgatgccgacatcccccgagatgctcatcccctcgtggcgccctggcaggtggacttgggatggccccatacgtacggacgactggctgctgcgggacatggtgccaatgggaccgctagtccggggggtatccccaatgccccGGgcacgcactttcgggcggtggcggttcgcgtgagcggggaaacgcaccagggaagctgtacccggggccggagtcgagcgaagccgctggccaagactgattGctccggcggtaacgcaacccctggttatctaCtcacggtgtgacccgagccgacccccaatTtctaacccgataatgcggtaggacgtttccggtaagggccgctttacggagAgttaggcttctcaccccgccgcattcccgataggggccccaggcccaaccgaccggcgccctcccgccCGcatcacaggggcagggggctggaacccctcggcgccccacggcgcccacaggcgtgtcagcatccgccctgaggcaaggcttcttgtgccagcgcaggcgtccacctacacgaaaggaggtctaatggtaggtccccgaatggtgagcgctggcggggctggggagtctcggcagcgcccgccccaccgcgcaggcgcgcttaccctccctggtagccCgatctgtccctgcacccagggtggtagcggctcacctcgcagggcccgggctatgcctcaccgaacggtcccgaagcctatcttccccgttgtggtgccgcctcgatcctcgaaccgcgtttagctctggacgctctgaggatcgaggcggcgcgtttaagaaaaacacctcgtgtacaatgtgtccccgccgcagagctatggaaacacgtggacagtccgagagttgcgggtctagcaggaggggcgccagcaggactgccacacagtcgcgatgtagtcagggaacagGcGccAtctcaCtgtgaccCaccgattgctcagcagcgctggaggcgccgccgccgcccacccggcccccccggaaccgggctcgacgaccattcttcgtgtgccgaccggtcgcttaccacgcgttTgtacacggtcactcctAttCcgctacacgaaaaatctagcaccaagctgggacgggCcgtgggggctggcccagctgtcccctcggttgttgCgaacgagtccgcggacgtctcggctagctcttcgcgttcgtctactatacatcacaagacaccatggcccttcgagagtcctgagggtgacgagcgcggccggcgcgtcccgtcccaacctgagtggagccccgtagagggTgacgggctggcacccaccccaaacgttcgtcctggcctgtagcccaagggttgatgagagggctctggcggcaggcggttgatcgcgtggctgcgcgtacgactctcttctacgctccaaagcAacattctgacagaggcctcggtgcagccgtcggctccgtaggaactcacccgtctcccgtgtccctgtgcgtcgctaagagagcccttttgctggccgctttgcctcgcctacaggcaggtggcggccgggggtgggacagggtccgccggaccccggtcccagtaggcctgaggtgggactcacctcgacccattcgAtcatggaaggacgctccgtttcactttactatcaagggcggatcgctaggctccggagagcctcgcgggggggcgtaggggcggggtccgaGtgggtcgatgagtgagcagccAccctctcgcgcgcttgggaggccgtgtctcatagggGggccaccatgagctcacgtgcaccccctgtctcgctttgcatccctggtacagccgcacttgggctcggcgaagcagtaccggtcgtaatgggctagctgacagtgaacgcctccctagtgccgcacaatagtTataacctcaacccgcaaCttgagagcgtgtaccagctcacgatgagtgaggacctgcaggtatagtctgacagtcgggtggactcgcggacggcggcattgtggcCgacctgatgctcccgcgtgctggcccagcgtgcactgccccggcggacctccgaccgcaccagtagagttcgggctaagcccccaatccttccactgtctgcaagacgcgcgcgcttggcgatacccggggggggagcgcaacggtccaagggcggcgggctgctgggccggcggcgcggcggggcacacgggggggcggctgagaccgtttcgtggctggccaggctgcagctcccaaagggcgtcagggggcatccccgggcgggagaggccgcgacttctgatagtgggtgccctatgctggtgaactatggccgttgctctgtcccagggcccaggatggcgggaggtacatgtgcagcaagcacgccggaccacgtcaggcgagagaggcgtagggaaacggcggggaggacgttttcgaggggggggccggtgctcgccacggggggctgaacaccagtgaaagtgcAatcccggCgTtgaccctctcgccgccgatgccgccaaaccccaaagattaGcctccctaaatcatcgtgggcacgcggtcgagcaaaggggcgggcttgtagctagactccagcctcgttcgcgtctcgttctcccttcgagggccttgccagggtccGccagaatcatctcctggctcctttgtagacggcgcttattgttcgcccggagttggcggaggacgggcaagtggcgtggccccctactagtcactgtgtagttcgccttacccactccgtcgctaacgccgctgggcgagtcggatgctgtggaggcagcaatacgggtctaaggcccactacacgaacccggaacggcacaggattgtgcgagatcgggccagccgccattcagccctatacaataatacccccgagggggggggggccgctaagaataggcgccaccgcggctcttggccgcacgcccgtccaatgtgTttacgtgttgcccgacccgtcccggttcttagtgaggcagccggacgaggtagacctcgagcgcgtgggcagggcgaaaatcggcataccatgggggaaacgaccagcagctgttgcccgaggggaggacatcaacgtagccggaatgccggggaggccgcgacgggcagaccgatgcccagcgcgtgaccaacacaatcttcggagagtctccagacccgctgattccgaaaccctcccCaatagccctcacgcagagttcatgctgagcgggctcgcctcaacagcacgtgggaacacgccgggcctagccgaacttgtatcgtggggccacgccgtcctaagcgccggcattcgctctcttttagcatcggagcctctacggcgcctcgtgctgcggcgtcgaccgctctgtttagtccgcacggggggatgcggcagcgcggtaagctccgttgcccgtgggcgctgttcagatacaactggcactttgacccgcggtcatgAtttggGGctgaggtcagcctcctcTagggcgccccggcgataaagatcccactagaacttgctgctagtattgttccctgctgggccaaaggcagcctccagagcacacatgcgactgtgaaaggtgagcggcgctgccgaggctgcccctcTacccggatgaagtcaaagcccgagcggggcggcccagcggtgcacgccggagcgctgagGatatatgcGgTcacgtgccgcacatgtcgctccgggcccggttgctcctcttcaagcgtCgcgctaccggccgggaccgggcggaacgatacctcccattagcggcccagCggcgggagccgcggtcggaacgccgCagtgatctAggtccgccacgttcgggcagctcgaaacctcttactttacaactccggaggcgtagcgattcaagggacCtctctagcgcgcctgcgcctttcccactatacgtggcagtcagcgggcaggcccgcttggctAcatgcgactccgttgaaacaccctcgtcagtccacgtcgggggccgacaacgccgctaaactcacagcctccctgaggctgctatgcacacttacctcgcaccgtctcgacgcctagattgTacccaacctggtacacctcggcccgtCctacgggcgcCggccgttggggggcccccccagCtcagtgccagcttcaggttccacgcagactttagcacccggatctgggagatggaagagtccacacgttacacatgaataaccctgatttgcgggtgttgtccaacgcgtccggcacattccgagccgccgcgcttcgcgggcctacggctcaaaactggaccgtgcgtggggagagccgtacccgccgcgtgcgcaccggggccgGtcaacgttcggggcgggggtgaGctagtgggtgaagagtcctcgcctcgcaggggggcacctctagcaacggccggcgcgccgcagatttcagtggacgtccccgccactgagaccagttactacggccttaccttctcggttgtctggcgcccccgccatCtgcgcgtcgcgatcttaacaccggctaagtcctgccaagaggtctaaggcaggcctaagtgggtccgcgggcttcactatagccgttcttcgctgcaggccgtcgtaggggaGccctcggcacCtcccgttgatcTgtgctgtctgacgacgaggcaatggctaacgaccgaactcctctggcaccccaagggtggtgcggcgcgatcaTtcgccatgtaacgcgtcctctccactgtcgcaggcgcgcttgccgaggtccgctgcggCcccAatgcgggcgagactcctgggcagggggccggaaaacatggcgatagcgccgtaaggcaagccgggtcagccaaacagcatagtagcgaacctagatacggtgagggaggggggggccgctcaccaaagcggcgagcggcggtgtggcggcgaccagccctgtttgcctagttttcaacactggcctcctggcggtggcaagacgccgcgcgcagcgtacatgcccaagtcatgcggaacataccgagctcgctcttttccctcagccgccctcggggtaggggccctccttgtacgtgctggcacgatgtcccggtatcgggtcGgcaacctcGctgggagattgacgAagcagatcgaGacgggccattccagctggtacccagccaatgagcctgcggcggggattctgccggtgaggccggAtgctatgtcgtcccggcccctcccacgtattggcccccgcaggcaatagggagtcccccctgccaccctaacatctttctactgcctcggcgacagtcgtCgcgtgagcggtcgcgacgccgtcaccatacagggagcggcttaacgggcacgtacgcgcccgtactacccgcggccgccagccggccacaggaagtgccgaaactccgcggtcctccgaggaacgcggcccgcggccccatggagggAgggggaaggggatgtcggcacGagtgccatggaggtgcgggactttgagtcctgacgcgcggctagctcctgatccgccggctggtcacgtggctgccaggtcacctcagatccggggGgtcctccagcaggcgcccaccccggtctcggagggcctcccgacggggccgcgctccggccgcggtagggtccgggcccccccccttacccgcccgataaggcacgctcccaaattcctggacccgtccgggcattatgcatagtcagcgctacactcccaacggggtgtgcggggcctctccgccgccccagtcgcaggagacgatgcaaaggatctgtcccggtcggccgtcgagcgaaacaaccgggggaatcgaaaagcgacggtcgcgggggcgccgccgaatgccgagcgcgattggcagacgaccggggtgaagttccggggtcgcgcaattactaaccccaagggatccccgggggccgagggccgcacggtggtcccagatttgtagCgttcgAtgcagcgggatacagcgcgggcggaatgcgtagcctgggtTttccccgCaacgggctggggtcgcGgtcgtgaGgcgggggcgccccgctccggaggggagcgtagagagtgaggctaagacctacgaaagagtgcccctggctagaggtaagagccttatgcctcgggtccggcgacgcatggcgtctgctgcacaggcggggcacgtgaaccgactaacagtttcccggctgattgcctcggcccaaacgctcgctcccacggtcggcctagtgaaccccaccctgtccgttcggacaattgcgcggacactgaacagtccagggactcgggccggtccgggtcggcaattggtttcCaagtcggtggcggcctagacctccggacgaccggAaagcgcgtctgctagagggcggggcgcggcggcggaagtgggtgtggcgaggaccacagtccctcaccgtcgaagcttcatcgtgtatgcgcctccgaactAagcgtaaatagcacagtctgtcctgtgagcccgcccggtccgcactcgccccctcgcgacccctctactgctacctctGgctcgaccTctaggccggtctcctagctcccgctcactagtcccggtctgtcgttggggtgggtcggggtgTcctgcgtgctggcgggtcgacccacctgcaggccgtatctgtgtctcgatcgcccgggcataggctggcgcccgagccgctatcacggctccatgccactatatcgggatggcccggggctcactatcattcacagagacccgcggctcaaggtatcgtcgttagtgtgcacgcgtcccgaggccgccggaTgctcagcgtctgagatccgggtcgcggggcctatatcgacgcgctgagagactagcagcgccccatcaacgaggcctgaagctttcgttgtcccacgtacttggcgtttagttattgggctggccccacaatagaagcctcataccgtggctgaacgcccctggtgctcctctccgcgtccatcctctcggggattctaccgcctcgttaccactgactcgacagacatggaacgaaaatggcctcgtatggcaccggtaggggcccgcatatgggcttctccccctgagcgtctgccccccccgcgagcggcctgacggaaaggcagggccatcgggaggcgggagctcggactcccctaggtatggccgagcgacccatgtgtttgcaccgagcaacaacagcgaaccgcgaggcggactcgtgggcgcgggccagccccgtcgccggggctgcagcagctcgggcgcggtagcctgcgctcctcgcgtcgatctacgacggtccgggttgagcgagacccaaaacgtggggtagaagtgtcaatagaagcacaccgtccccccatcgcaggggggttcacgggcctctagtcagaatcagaatgcctctgtgcaatggccggactcggcccgtggagtctcccctggcgcagtcgggaccgcgggtcccattccagctctttcgctaatcgcatgacgggaccgtttagggcggggggaaccgccaacagcgcccactaccagctagggtgagcgaacgaacagccgaggcgccccggctgtgggccgggagcgctagattttaggGccggaggactccgagcggtcggccactgtcatctcgcgacccgtacttgtggtagccttgggccgcccggaacggcctgaacacccgaccagtgtggacgctcgctcctgtcgcctatcccagccccgccgTcccggcccagcgggccacgttagctcccaCGgaccggccctgacaccgcgtcccatggcctgattgaattactcgtgggccgagtcgactgcgacgtgagctcgtaccccccctagttaggataccccggatgttacgcTgatgtgcgccataGtcgcgctatcgcagggtgcaggcagctgagacgtaggccActcccccaagaacggcgcctgCacgCcgGggcggcctcgggctacaccagtatgcctggccTcggctcaggccgcgctgcgacctcgggattcagggtgggcatgtccccgctagaccgggggacgcgtggatctaatgagtactgctcggctgagtcgaggcacaatcgggtacgcctgggcgtcggccaccgaacctctagagctggggtgAgtcctagcccgcggttaggtgcgatgtggtccatcacccccctggctattttatggggctcgcccatgcctcccagccgcgcttccgatgccggcccctccagcaggatggggtacgggtggcttacgcTgCgcgccgcgggtccgggcggtggggccgaGtgcgcgcgggtcccgtggtcccagctcccgggcggatcgtcctcctctctcacaaggcgtcccgagccggtggtcgccacgtgagcgctcTccactggccaaacctagcgtgctgccgtctgcgtcacgggatacaccgatcgaatgtttagacgtgccggcccgcctgttccgcgaggtccgctaaacgggccatgatgcggaggggcggttcggggcgctggccgagccacaaccaccatgcccctcaggccgggcggcgctccggggctcgccggcgggcgtgacgctgaccggaagaggccgaggcagggacaacggtgagagcgtctggagtgcggacggtaccggcatcgtagtaccttgaagcacagcccagatcacgacgcaactaagcggcgtgccgggtacacctgcgtatagtcctccgcacggagctcctggtgacgtggcagagctaagcagtaTcatcagcgtgaagacccggggagatataacccgcggtgagcaggattccaagttagcacagcagcgcgcctacgggtaggatgagatgccccccacGagtttgtcggtcgaggcctcacattcctcaatgggccgCgcggcgaggcggacgctccgtggcgccgtgagggatcaTcaaatCagtcagcccgttatcccctcttcctgtagaggccacgagccatcagagggcagGacgtaattgtgaaactggctgcgggggacagcacaccctaacctcggcgagccaacttcggaactgataggcattgccgtgtagggataaatagggggcgagggagggtccccgcgactaggcaatagcggaccggaccaatccttcgatggtgcggcgtcgcttggaggcctaactgtttGcggcactcaccatcggaagggcgccgtcttcgaagggcacacccccacgtctcgcagcatgcaAcctgttgtgttgaccggaggcgccgcccgtgccCgcgcggaggtgcgcgagcctgttctatagtccaaactggacagcaattcgctgcgtaactttcccagcgcctgcggggacgcggtccttcttgcctgGcgcAagctgtaatagggggccgaaaaatcccccaacggttgtgcctggttgaacatccaatgattctagcgcagatatgcaatccctttaaagc
>trimmed.Xvv1326.SRR494491
TATCCagTCAACCCGcACCCCgctagtAggGCGGgCTCCCACACTACCacacActCTAgGgGCCcaacTcGcaccggTacaaAgcaCGgTgagtCtcCgCAGAGTGAcGggGcCCTCAGCcTTAgTCacCTAccATgAGGATcTACTcAgTcGgtAGggACGTGAACGCCATTTgTGcGGtcTACGGgcAaGCgtTTCgtcGccGTgCGAGCGGGAtATACGGcGCCTCGTCTTGTTTCAtTTAAATtaCAgTCcCGccTTTcTTATTCcgaggTgcagCAcAcaGcgagGAcgGtCGcTTCGGACgATATGAGTAGcgcGACcTGCATAGAGgGgCCgcggAAcACgtTGAGAggActTGGATGAGAACgAgCcagGgTTgAGGGtcaTTggActACggtcgggcCGGccgtcccTACAAcCctTAgcgctacaaggggagtacgccccgcCcgccgcCcccggGGtTaccAcGagccaaatcggcgcggagtgacattgggcaGcccgaggcaCccagagcttgtgaccgggATTAAcTAaaTTGgAGGCCTCTAAAGGTATAACCTCGTgGGTGGgAGCATAAAGTGTTACTCCTGGAGATTATCGGTCTGTTTACGTTTGTATTCCCGCAAGCCCGCgTACCgGGCTACCCcATTGcGAgtgcgcgcgCTCAAGcCATCgTTgtcgtcgAACTcaGAGgaTagtTgATagGGAagTgGTgTaccggGCCCTGtcTgcCGGCTAcTATgTcAtagcgcgcaGAGAATgTCAGCAAAcCGCTTtaAcCcgCTGCGGcTgggGGTCGGAgtcgAtTagAtgtgcgtctggaccgctcggaCaTCccAgtTtctggGggTCGTTccAATCCgTTGTcGgcTTTACgAgGgGTTCTACgTGcgGTAGGcACcTTgCcgGcTaGGTAGCTAgATCTGTgTACCGGAgTGAGGATcTTCTATcACTcACTATCAcGGAAAAATGGCTTCCCCAtcCcGCGcccGcCGGCAacgGgcAcgAagccCgacaaaaacaactaggccCTagacgcatccgaccggCactcttgGgagtgcccccTccCcgcTtggCcgccCcCgcCcTccccgctagcgccCTcgCaTATCCagcTttggcggttcgcgcgcctcgaaaGgGAGgCAtTccgcgtcGctgtgcgtgaCaaGCCGcgtAgcttgCGcGCcTtCGGCGTgtCAATCCtggCaCATCGgTAcTCaCcCTTTgCCTCTGaATATGCCATTCCCCGACTTGGGGGGCTTTGGCCTTCTTAACGGGTTCTTTGTGCTTgATGTATTTCTGTTCCACAcAGACATCTGTACGACTCGGAGGCAgtAAcTAgGTccgGGGTCCAGtTAttAgTTGcTAaCctACCCGTTAGCCGGTGTcCTTCGCCGGCggcGCCTAGGAATTACAAGGGcCCcGCGaaagAggcGATCgcgTCACCACATgAAgACTCTGAGTGGGGGCAATATCTAgCATCGgCCAAACCCAGAAACAaAGtcGggGtctTgccTcAcAtACCTCCATGTTgTTACCGGTTGtcTATtAAGtAAGAGccGCAAATTTcGtATTTaGggGGGcCTcCCGcCTcCgTTACCaAAGgaGAGCTGTAGACCGTgTAcTCcTgACTcGCgGAcCGgCGGACccGCGgAGTTCTTCTcccTGGTCCAgCcTTAcTCTTAGTCCGCAgGCGTcTAgcGCGtATGGCATTgCcGGCcATCtgGCgGgCTGTcGgAcGAgcGTgcggtTTgTcGGcACTCGTGCTgaagcccacGgcagcgacGTCCGAATcCGGTGggggtggtgtcggatgcgtggcgccgtgcAGggggttggtggCtaGCtcgacctacactCCTgCGcCtTCACgTtAccaCGCCGAcTcAcgCggGTGCgTTATATCATaTgctgGgGACTGgCtAATggtccGAAcTGTcTTcTACgGCCGGTATGCgtaaGGGTCtATCCTAGgTAGGcaCGTCacCgACCTgTCcTGTCGcAATAATGcccggGTgAAtgCCCAGGcTGGTgCGACCATGCtCGCCAGACTGGcTGAcTCCTAATtCcaTTACCTCAaGATTGTTCTGcAGTCCCGACCgAcCTGaGgAGCCcAaGTCGTTCcaAGTGTCAGCCGGTGCCGCCCATCAGCCTTTTGGACTAAACATAGGGGTGCAACTCAGTAGAGAACGAGGATCTATGGGCGGGCTTAATCggcccgagAttgaAccCAgggaGaCgAcacgGgggCacCgccccagacacGTttTCGCgGTaagGgctTAGCTAAATGTtccTcCACTccTcAATATAACGCCCGTTAAGgGCtTCCTATTTTTTTCCTAATTGTCGTGGCCTTTTATGTTGACGCCCACGCCTTCATTGACTGCAAGTCCCAgGAGTtAcAATAATGaTAtCccagaccaACTAAAAGAGCCGGTCacaAGTCGGcATCcCCggcTATCCTtcAgTGTgcATTAGTACGtCcACAAggTTTCTCTAAGCACAATTGGGCACCCATTTAcTAATAATCGGGCGCTATAGGGCGACAcgTGgCTgCAGcCCATTTGTcGGCAggGCtTaTAAGcGtCTcCcgccGgggGCCGTGCCGAATTcGcTCCGGACCGTAgTgTGATCTACCgAAAAtcccTGTAGCGGTGCAAAcAagTCTCaggtgAgAacATTcagAAACATcgcggATcccGaccgaagCGgcaAggcgTgtgcggggttcacagagcTgttgggtggccgctGtggcgtacccccgccggtccaccattGagACcgAtcgccAccGgctaTggggGcggggcaccTCgCgccCttcctcTcgcatTAaactatAttgcAGGATCaGGtACctgcgGCCgCtcatcTAAGGcgTCCGGTAgCCAAATGTGAATCTTCGAGACATATCgCTCTAGAAGATACAGCGTTCCGCAGGTCTGCCcggGgcGcGgtGgccGGaAAcGgccAcgGAATCGGtGacAAggggAgTcggagacCgTCtTCtAAGgcagTcggAgTtaagtaggCATTgATaGcCcCTgcAtCcCTggttgtcttcATAaCAGggaTgaccggccgTctGcgcggTtgtttaTCgGAAtAgcgggccccTcaaCgTatTAAcgcagctggcgccggccggtgcgacGAGAtggctATAGactAATaCggAGaGTCCACGACCAGAcGAGGCTGGCCACTGCGGCTTGAGATATACGGCACGGGTGGAACTGGTTATCTCACGAAGGCTCCATGAgcCCGATCTAAgCGAgaCcCGATccATGGTccttaggttAgagcgggctGgTGGTTcgCcAgAGATCGgcAGccgTcGGAgTggggccccgaccgggCTGgTGGTTCTGAGCGCGTTCCGGACGTaGATCGTCGGTTTTAGTTGTTCCGTTGCTGCcCTGCGtGGTCcGcGgCCtCAtATcCGGCTCGAcAGaaCctGgacTAggCtgGccCCTTTTAAGTCAaCGTCCCTACGTCTgATAGCcTACTTATTGTCGGGCTCTCGAGgCGCCCCTcTCATGTTTTCGAATCTATTGCGATTATCCAGACGGCGCCgCTCTTACGACGTTTCACTTCGTCATCgCATGTTcccATAgCTCACCGGTAggCGAcCaaATAcGtcacgagccCCtgtcAAcacCACCAgTGGCTAACgAcATGAATcCgtcgaGAtCCggtttGCACacAGctctgatggTcgcCTTTACtaTAGgaCgTCCcggccgggtGCcAtgCGAGAtGCGaGcTcCtGgcCtacgcGgTttgCacccgCCTAgCTcGCTCGCGTCcATAgAcAcCGGCTCTGAGCCCGcTTAGGCATAAGGTCCTGgGATgcCTGaGcCTcATTTGGCGTacgaGCTAATTtATATGGGATAAGTCCCGTCAGCGCGTTACtGtgaGagtgcaggTctAgccgtgTtcgtcccgcccgcCccTGCCGTtgTAgCacgcCAtTcTGGGAgAcGActcccgGgggtggtcctCgccccCaTAtgaTCCggcgctccgTcctgccggTtACggTCTTgAAgAaccgcGgCagccAcgtggcacgggGtttgctccCCTcaaTCCAGTGAgCGgCTTgcAAGGTACATTCTgAGggAAgACCCGTTcCTTATGACgGCGGcTgGGtgtCacagtaaatttgttcgtttacattcgggaccggagtattgcctgagacggggCttgacaaggagacgttCGcatacccaatcAcccTacggcgAAAgTCaGTCgacGggAccactgtcCccccgcacccgccTCGggccgaTggggCcgAAgCTTGGCTGGagccgtctggAcgAacTccgggcaccAggggggaacgcGcggcgatcGgacggcccggctttcttccgccGaCtcgaTAgGttgaaAgccgaatgagcctggtcAgaTccagatggtaaCggcCGCagggggAGCGGcgAgGCggTCTAGaccctgTcggcttaCgaagtgAaGgcaacgacTgcgccggcgcgtacgcctctacgcCGTtTGTCTCTGAGCTTACTGATGGCAATTcGATgtcaCgGcCagTgccgCTAggGGGAAcGaAcGCGGGAcTATTGggAtCCAgTcAcTcCattgAAAAGatCCACTggcGcACTTGGgcgtccGTCGcgTAaaCTGgCCgaatccGcctaaaagtagTcGaACCcAtcgTAGgCgAGTGCTccAAGTtATggagCCTAaGCcACAcCaccTGTGAGTaccgTAcCTCGGgATagctGGCTCAGaAGtgGgAaggAGGCCgcGgggtAGGcgggTAGGGCTcctggaAgACGTgcCACTggActTtCAAgACtAcgAcATAGcATACTGGGTGTTATAGGgGAgaTATgAcgCgTgTTAagTCTGCGAGCCGCgACGgcgAAGGcCCAgAaGCTAAAgGAggATGTAGAGgcTCCGCtgtCggGTgTTgACAgCcTCTGATcCgcCGACGcGcGCTgATGCTccGCTTAGTGgGgtCACCGAAAAATGCCCgTCAGTCCtgGAgGggGGGAtgTCATGAcggTattgggCTccaatTCcgcAacagctctgcgggtagCGctccaccctaCcAcagccaatACGCCccAtcGtGgCAgTtGGTCGCcATCATTATTTGAGTTGCAAcAgCCGgACcAgAGAAAcGGTAATGGAgCcATgGTTCTGGTTcGcGGGGGCCcACtAGAATAAGAgTgcAgGTATAGAAATCTACgGTCAgTAcCGAACTcaGGgAGCAgTcCGTGAcgaCGTGCgggtcccgCtCGTAGGcCCcCCGACTGCCctGTCaCaATACggtAgcccTCAgTCatgggCcaactTgAggACGacACTTgATCGcCCCTAGCGgcGgTATcTccgaCgtCcTAgGCAGcTAcGAAcGTGTtaCcgggGctagggcGtCGGtTACCgcAATATcAACGcTTTgGTAGcCCTTGcccagagcatcaacAgcTCAggCCGcCgcCggggacgcgattcacTTGTgCgaGAGGcACcAcAcGgTtGcCGCatcctGGActgaTGagcctcgtgccccggccccATtcTcAACTCTACGCTATAaccCTCcCTGGtAGATGCGtcCCAGcgTCTGTTcCAGgAcGTAtgGcAaTTAGCggAACCGTTTTCCgATTAcgGTGTGCCTCACCGTACCGTCCcACCGTAGTGtTACCgCCTCgggCAggCCTGgcgGACAcCCAGCCCTcCCTGCCCGAgGcGATATTAgAAAAGAAgGCgGAAATCGGGGAgGGCTGGGGCTCCGCCcGAGACAGGCAAGCGGTTAGAGCATGTGGAAATTTATGGAATGTTATtGAGCGtAGCACTCATgTAcgTCCAATGCctCCGGcATGCAcAATGGTgaACATTcCCGTccGgAgGGcacttAgAgggggTagAcATCAAAcGACCcTgGCTTCagcAAgAcCtGcctCgGcgAGTAggCATcTAAcctTTAAACTACggaACTCccCtACGgcAgTcCTAGTCGCCACAACATTTGAGCGGGCATAGCgGccGGGATAaGgTGCGtgaGtTGCGGgCCcggTCCTATTgtTAGacTCaGgTGCgGCAGTcATGtcCTATCTTAGGGACCCTAAgCTAAggTaCcTTCTCGTtaActCTgcccttcCgAGCAATTTTaaTcAgATTGgcCcTTCcTTTATCGctcAgcGCTGGagCgACcAcTacatactAaggCCcgcGTggCgTCGACTGcTCCACccTAGCTACACgTTCcGgGtctgAcAcccCACgAGGAgccAtGAGTcCTGCtTaccTcAcaGcAAGTTTTTGTgGGTACaTTcGGATCTTTACCTGcTACTACTCCAACcAGAAAATGCTgAtAtaGGTCcAgTtcggTTCcGTCCGCcAtGGAgcaAgAATGggtaagcgCgTTGggGCcTAGTTgAGCCCgcCTCAGCTAAACTCGGAtTCTAATCCCTgTTTGCACCAGAACCGccAatcTgAcCTTAtcgcACGACTTATTtTGGCTATCcTccAAccTcCgTTCgTCGTTATAGGCGACcACTCCggggcgGgcccCtcGGGgtgTgccccTTgAtCtggCcgTgCGGCACGAcTCCCTCtCctCaACGcTCTgcACTTcACgatgCTCTGAGTcAAAATCGGaACcAgtTTCTgcgAAAATGTAGCgAcTGgGCTTCAGtTCGATGgGCcGTAcAGttCcGGTGCTGAAGGTGTGGgAcACTCGCAaAAGGcGCCGggcTTGCCcAGTgCACCGCTCTAcgcTCTagtcgaCcgcGCcccTggcgcaaggAaaacGCGCCCCTAACCCcTTtgtccaacCgacacCgcTAGTccctcaggcaccgGgCTaCaTTAcCgTGaGacgAccTTgTTcgCaTGCTaggtaatcagcggaggcGgccCCTTAcCCccaTAAGCctCgTgtcgCAgcaGTGcgctcTtgGTTAgcTACgAggcGCcGTAgTGgGACTTTTCCCGTAgatggAcgAcGCTGATACCAtCTCgggCGcgCcCTGGcaCGCCTTGgTGGgGCGtgcggaaAAaGgCCCagcgCagaccaagtaaTActgAcgcCgCCCTATGGCGCTTCCGTAGaAGcATAggtgtCTTGGTCTTGCGTGCTGTTGGGATGTGCTCgGCATaTCcAGCcCGAAGgCGtTgTTGCaGACgTGCGGTCGTatCCCGCCGCTCcCGTCAGTAACTAAcgTCAcaAGAATTGCTCggcgAttcTgaaCCCTTTgcCTggATcctGCAcCgcGTgggcgcaTgacgtCGctaTaAGgcacagGCgCtGCgGgTaTGAGTtccGcCtgtcccgcgctaacTGTTCTTTTTcgaCgTTCTATAGCCGcagTggtcCCGCAAtcCGAAGGTtTgCgtggGCATTccCTcCCTTTGTAGGGtTAcctgggCgcgCcGCCtGgACGTcCCcTTCAGGTTCAAATGACCAAATcAcTcCAGCAcACaCCGCTCCCAAGAATGCACATgTgCcAGCTAAGCTCCggTcggGGatggcgctcggtccgccATcaAtAGTGCACTTTACTGTGAGTGGAGACGGTACAAATCGgATcGAAAATgACCTTgTGTTCCATCGAAATTTGATGAGAAcGATCATTTTCTCGTTTCTAGTCGCCTCCgCCTCTGACCCCATACCCTTTCTCCGCTGCTAGGAAGGGGCTTcACTGgATCtTGGGCtCcgTCGTTGATcTCTgGGAGcCgcGgGAcGcgTgACCTCTTAGAGAGAAGAAGgTGTCcAGCgCTcgggccaaTtAaTAAACGAACAACtTcTCCACCGAATTTAAGTCGCCGGgTATGTATGCGTATGCTATAgGcgTgCGGAATGCcTTagGCcAAATATTTGGGAAcTgtgcTATTATTGcCCCTCGGCTTTGCcCccATTAAaGgTCccTGAtgcAGgGGTcCgCgATTCAAGATGgTTCGccgTgCcGTCAGGTTACCGATCGTCTgGACCGGTGGGCAGATCGGGTAGGCATCGAGTGCAATTCCAACATAGAAcGATGAATCTATcCTATCGAAgTGCGCAGCCGGTATTTCTTTATAATCTAAGGCTCGAGACTAcGcTGTTTTGATGTGGGCGTTAAACGTGCCAAAAAGAAAGCCCcActcagggaccccggcacgtcggccGgTGTATgaTATGGGATGATcTAgAAACcTCgTcCTCTACAGcAACTGGACCCGTACGGCAtttggcctTtAGCAaGAGCGGTATCGAgCgccggTgtcgtcaGaTGATCTGTTtTTCGAATGACGAGACACCCgcaAcgcGggcCGcaAccGGcgcgcgccgCgTcTagcTAttTCtATATCTGAcgCgAcACGTCGGgtcCTCaAATGTCAGACACGACgTgTTCGGGTgtCcTAtGCcctCtggggaCcACgCgTCGATGAcAtCcccgcaGgtGCGGTTaAGggcGacAaGAAgTGGCgCATCcGgcctaacCccCTCgCcccatgtaggggtacacgggaccgcgcgcagaaagtatagttttgtacgcccgccttgtCAagcaacacaaggcgagaaaggacacgAAacccgaccccgCTATACtCgtcgAtcagatAcTggGcgccGGTTCCTgttctgattAcAGAGaATACACGTgGcAgCCTGCCTCCGGTcATAGgATTCCGGTCCCCGTTCATGTTGGTTCTTCGCTGGGAGCTTCTGGCGcAcTAACTGCGAGGAGCGggCGCGGTGTCCGCCTGTCTGGGGTGGAAAGTGAGCGATAcATATATAgGCATGGgAGTTTgGGgGgAGAgaCATCGGcGAgaCgGcCgCGcCAAGcGTTGCTgTTAGAGACcGCCGGAGAGCGCTGTcaaatAAGCCAgGgAccATgGtcaaCcgtcgtCggggaGcCGGtcTggGCCtGcgACGGAGTccccCgCcaccAggCTTCACAaaTAGGTATaAACAgAcgTcCCCGACTaGAGgggTatgcCatcggtgaccagcgagagagtggcCGAcTTAAGTCCTCTCAGACGGAtCACATAACATAcTTaTgtTcacacCgTcgtggacCCTGcGAGCGAgtTAtggggCTcTcacccccaAgcggAgtTgacgtacgGCAGggAGTAGTCGcGTTACCcATCgcgggCGGcTTGcgaTCtgcCcCcaGgGAgCATggGAtGAagccGCTAgCTtTAAgGAgcgCAGGAGGCtTgGAAAcCCCTCCCgTGGACAAggcgCgttAAGTcCggGgCcacgcgcAgCgCGcgCcgcCGACggttgtcTTGTCGggggGTgAcACCACgTCAgCcAAacAgcGCTggtCAGGgTCccACAgtGgacaGtGcGGCggATcagcgctctGAGgGGCaggcGTtaCCGAagGCCgGcgGGCcATGCCaCATCGGCGATGTCaGGGTaAcCGctcGGTcctgctAGAcTcgtgggtgAGCCCgGTATccaGCcTGgATAGTACGTCcCTgATACcGcAaGTtatCActTCaGTaCcgcgctgtgctcAacagggtcgTAcggctccGgTgcaggGgCCcaaGGtCagaTaGtTtGcgcGcgacaacctttagATGATTTTTCGGTAATCCAagAACCgGAGCgACcCcTTAcGgTaGtGcCCaAacTCCAGTcCGTTtCACTgctcATtAAaCgcagAgGAGCTCAcTCcgTGAccggGCAGGGAATCCcGTGTACTTTAAAgTCTgCGATCTGTAGGTTCCGCATTCACGTCAACGCCCGTGTTGTTcTACTCTTTcAGCATAATGATGTTCCAGTAAAGTCGTTTTCCcTGTTATGGcTTgAAcAATGTTGTTCCGCCTCATTATTTCACACACATTCTGTTGCCGcCgCgCGcAgGGcTCgTGcgcGTaGTggAGGTTCCTTgATATTTTtCAGgtgTCggcAACaAATTTTTGcACcTTTGTTCgggAgtcgTcgACTGGgGTGGCCACGTTTGACGAGTTAAATCCCTTAGTGTCTGcGTAAggGgGGCCATcACgGTcCcCCAtTGACcTTTACGtCCgctaGGGATACAcTCGGCgGGGAGCCcCACtGgGAgATGCcataCAtgtatcGGcTGcGAATGgtGctccgtCgccacgggacgcgCggCtctcACCgggaCcggtCAgaCcTAggTGcGcttctCaaacgcaccgtagccggcTtgTgTCacAacgcGCTCgAgcggtcgccagtcgctCCtcccTggAggcCACcggcAggTGggtatgAtaCGcGcAGCGAtccTCtGaAACGGcGTGCtGAcGGCAgAATGCatcaAGATGTAggtGCAAATAAGtACCtccTTCTGCCGCGCTGccGTCCGCAcAgCCTACGCGCGATGGGAAGCGGGcTGCGACTAcAATAGGGTCcCccTcATAcATTACGTgGggCTAcGcCcGCgAATGCACACGTAGAAGCAGCCACGTcACAGTTGAATcAcAgcgTcGtcaCGGATGgCATCTCGCcTCTAGATTACTTCACGCATGGTTACTTAAAGTTCtgTCgCCAACAGTCCCGccTCCGTgCGCGTAAGGACTGCCTCTCCcCGATCCCGACTGTGAGCCTCTcGgAACCcAGgATCgagTCGATCgTGGAcGCgATTAAccCCcCACtgATcGTGATTTcccTTGACAACCCTgTCAgGCCccGcGGTcCGGcccggccgcgagaaTAgcGCTggTATTATCCCTTACTCTTCCGCGTAAaGACGAcGAGAATATAGCgGGCAGTAGCACACGCTCATAGgggacAcTGATGcTTTTTCtcGGaTTTGCgacTCtgGcgTGTGGTTGTcTACCGTcGaGGctCTCTgaAcTccCGcgTTCaGGcCTCTCTAgtacaggGGgAtCCCCccGTGACGCGCgcGtgcgGaGTCATCCAcGGtATtAGCcTTCCTTTACCTaGAATTTTCTGCCCgATCCCgCcAGTTTAAGGAGTACTGGGGCTGTTAATGTCATGCACTAGATACATAGGGCAATGACCaAGACCCTGTGCGCATCAATAGCAACTCCAgACGGAAAAtATGTCTgATcTcCgAGgGCCcgcctgcaaTTTTTTGctCacAGCGGATTTAACcgTATTgTAGgTGTGAGTAGaGCGgGCTTCcATCCCTAAACtaTgCGcCCCcAGAgTTGCGTGCCcctAcgAGgTgGaaCgtAGTgGTggCtgccgCCTtGCcTgAaAAAgaTgaaAATGAGGggATGGTCGACCGGTCACCTATAgTGTAgCCGCCTCGGGATCTTGTTTGCTGAACTTGaTCCgaCGcctGAAGCATCTcGATgCGGgTATTgAGAAAgGacgcgGTcgaCTGTACcAATTGCcgagCTAgTtAAcCCTtaGAAGTcAAGGGCGGACAGATGAAACGCCCGGAGGtTCGGCgCAcgCAaCTgCCTATCCaCTAgACGtatcgcgcGGGcGcGgctgcccTcggacGAtGCTTTCGgcGTTCATGcaAGcaATAGgttgaTcgTAGcCCCTGAcCGCCGAcCTGTgAcAgcTctAGTgGcAGACTaCCCcggggtgttAggcgaTGGCCAGCGGCTCCGGCCtAACTAgTTTaCtaccagaactctGaAcCcGGcgcacGcctcaacgccagggtgagggGaGCCCTcGgGAcCGTCGATGTgcgcagAgtATTTgccATACTCTCacgAacagTgggCgagcCGGGTGCCCCCGCACGACCCGgAggcCAgcgcgcggcGTCTcGAGCAgCGCTGcTTCCAggACAcGTcTgACgaTACctCACAATCCCAGaacatTTGAATctcTCGCCTCGccTcTGTAATcGTgGcaTCcCGGACTTCcCAgCACgACGgggcATCGaattCCCCCGgtGTTgTgAcaATCGAaAGCCTCccacTctGaGgagActTtcgcTGTAcCGGgcccgcagCCGgGcGAAATCAGGCCGCTCAGCTACAACCCAATGGGgggCGTCTGcTGCGATagggcTCTcgggcggAAGtCgGgTTAcGAGCgGAGAGGgAcGAGCCAGtATAAcgcTTTAATTGAaaGATATATTGGAAggGGAGtAcgGTCTGTTTGAAGCGGAGCGCTGAAAGCACAACAGATAACGCTGTTAAGCTACCACAgGGTctCATAGGCAAccTCgGTTAAaATgTAgACcCgTAGcacCGGAACGGAggcCTCGAagacgtaccctgcgatcAcctcctccggtttcGcccGCcccGtTacgcgatctAcAtcctgtctgcCcTggcgcggggaggggtgCctcaccggagaTccatggttcccTcAcCAtctcatggctatcgcaacgtcaaagtggcacCgctaatgGAtagggCccgaggccccggcgCCTTaGCTATAAtggCGgtcgCtcgTtTCaAAcCCGgTgaACATcCAAGTTAGTGtaCgCAgAgGTACCTCcCTTTCACGgGttcGggTTTgGcgcCAaTAGAgTTCtTaTTgGGgTGAAcTcgACTTAAaTGCCCCAGGAGGGAcTGTGAAAGAGTCTTATGcGCCGAAgGACAGAAATCAACCCcAGGGCAGgGACCTCGAATGGAGAAgAGcGGcccaagAggcgCAGgCCGgcTgtaacTtaCGggTccTctCcctAAaTTAAACggaAcAAcgcggcAgTGccGCGcTtcTgggGTAcgAaAGgAgagaGCgcgGccgtagTTgttAtAcTTTgaTacATGCTGTcgGCGcgGCTCccTTAggagagccgggttCgGcTTACtccccTtagcggccGTCcTcgaggccAcTTCCCTagCACTAATGTATGGTgactccATTTCTAGTTGgAgGCCTCTACCTcgGGTAgATGGGATTCGACCTAAGTACCCCCTGCcCGagtgtGcGCCaGCgCATgGgaAcggAAcAcGGgTTAgcgAaCTGcCTGcCTATACCGcAGAAccCCAAATGACCcGcAACCAAACACCgTCCGGTCAAgcggtgCGCgGTcCGccaggcgcCcAAcgCCGaTgaacATgCAgaccagcgcCTaatTgtcgtttccAagcccgTaGgTccagggagtgaccAgTaAtgcggATgCccgctggcgctTGttcggTcgatgcTATCTggTCTCCGgctTcctgGCGCTCGGGagtgaGACatTAcGcgccccggggggaggcAcggtgggtctccgaAgGGTTCtCATGCcGAgGCGACAAGGCAGCACTgGAAGAGAGCGGGcCTGTTATGTATGGCTAAAAAAACTATATAGCGTgGACATGGgCTGcTTAGGTGAAGCCAATGTgACGGTCGGaggttccgtggggaggggtcgggggGGgagCccAGCgTCGAAAGcgGTGAcCCATAACCAAGTTCCACTCAAGGCGgCTCCTTTTcgGtcTcCAaGAAAGCAGAATTCcTagCgcAcgGTCTGCAAAGgCATAACCACAGgcgcaCATCGGGCCAcTTCCAAGCTTTGgCcGgtCcgccttgagttatcGAtcccctttcgcgGtctcatAcggGAAAGGaCCTAtctacggcccttcTcCTgTGactATCTggcccGCAACTCtCtagAGCTGtGGCGACTTcTAggcAAAgGgggGCGCGAcccAATtTGCAccgacGGcccTcgaCGCgAtcGGTAcGGTTCACAAGATCCCTagCCAAGGGtTAAGCggcTcTatGTCtaTggGcgaACACGCCTCgGAAgGTCtAAGgcGGaCgCAacGgTCCTtccggggggtaAcTTcCGGATTGTGGTGTTTAactttcgggcggtgAGACCAcgTgtgagGAgggaGGGAcGcAGCAgCagcCgCGcTcgAATTTAgaCCAAGTGCGGAcTgTCgTccGGAGctCatGGACTGTTcCgCaGcgcaacccctggCtatctaCCcGcCgtgCTaccTACgTGgacGccTGGCcCGtGTTcTTCCaatTACgAaAgacgttCGTAACaCAAATTAACCCGTAAGggAGCGAAcCATCGGTGGGATGATGCCGTTACCGAgATAcTAGAATcTCGTTAGTTAATAGTctccTAGTCGTGCcacagTCgcGAgAgCcCggaCTTTTCTTCTAGcAcacCATATTGGcaAgATtgGAagAatccgccTCAGAgcGGgAcCCACCACCATGAcAAGAgcAGTcGcGtacaGAGGGACGAACTGCGCACCGTCCTcTTTGGCAACTGATATtATcAACAGCgAAgGTCTCACCTGCTATGGATTGGCGTCcCGGgCGATAGCCGTTTCAGGCCgGCATTCgCGcCCtccctgcaccTGACACCAACATAATtcGTTCTCTaAAAcccgCCGCCCATctcGcTgaGACgCccTgGagTTCGCTCCTAcGCCCgGCTtgcGgccCTACCTctcgGCTTCTACCGagctcGCgGGgGtAtgaggatcgGgATggcgcgtCtCaTaGaGGcGcAtcgCgAGTaTCACCCGGTcTccgcagGgctCCCgCCCcCTACCTacGCGccAGATACCATggAtTCGgcCggGggggcgcTGCGCAAGTCAccTTGTGACGATAGCAAagtcaTgAGacaAGcacTAGcCcaCCgtgGccCacGCaCCATCGagGGAGTTCACGACTAATCcAATTATGGGGTTATGTGGTTGATCCGGATTTCTAGTTGTTGCCGttcgCTCgccAGTTggtcAcCCCTTGcgTgttggtaTaACAGGGcCccGcCCCTgctGAacgCaGCCCACaAcGTTCCCTCAACacAAgCTCCAAATAGCCATTTGgctgGGTAcCTgCGCgttgtgaaTCGCCTTCTgCaAgtctcggctCATCTCCTAcACCTACAGTTCTCTTCCTGTGCCGTGTTCCACGGTGCTCCAaAGTGCAGTggGgacgGATATggccgCGTcAAGGcgCcTcTCcctTaAtCCGTTGTGAtGCGAAATAacgggctggcCcGGGcGccGGaTACCGACAcCAAATtgtCATcGaagggtCCGCAGAGACCTCTCgAGAATGACTAACCAatcgcgtggctgcgcgtacgaTCcCACCAAGTgTCcTaaaAAcaGGGCGtTGGaAGAgTGCGACCATCCcACCACCGGTGACGTTTCTCTCTTTCCTCGccACACTTTCACCGCCTATtGGCCTCATTTCCGCActCATGATCCCgGGGTgcTCCTGAgcaATCACcggccgggggtgggacagggCATAGTTACTTGTACGTTTGCCCCATTCAGACCCAAGACTTTTGGgGTTTGCCAggtcGCggaaAAGGAGGGcgtCCcCTtGCGGGGGGCGAAAcgAGGAATGGACTGTcgAGAaATTCcgcggTgAgATgCGACCATACCgtTTgaGGATAtcCGCCGCCgGgcagcccccctctATcATATCCCAAGgTTcACACcGTGCGgggGAgTcGGTGCgGActcCTgtgTaccccctgtctcCcttCgcGtccTCgAtGcagccgTGcttgggctcgCcAGagcagtaccgAtcAACatgggcAGTTAAGcaACCTGATcctcccCGgtgTcgcCTGCCGgGcaCCGTGGTGGGTTATGaCCAgagagcgtgtaccagctAaTgGtATACAGgTTGTCAAGAgtaGGAtTCgCcagCTAAACTAactTgcAAGTCCcTgTGGCgtgCACgaTACgatCcCATcgcACgctggcTTGgTCCgTacGAGTAcATTAAGGcCTcAGTAAcaccaTCGgGAtCTggCcCaagccGGTaGtTTGCccGcGgtctgTaagaGgcgcgcCTCGCgcACCGTcGAgCgAACTCgcATGGTAgCTAGGTTTTgAcgggcCCctgAgcTgCTggcgcggcAgggTTcCcggAAggAcggTtgagaccgtttcgtggctggccaggctgcTgcCTTTaCCggTGCCcagggAgcatcccGAAATTTgGCCAATGgAACTAGcCAGCGCCgggtCcccCatgctgCtgaactatggccgttTctTtgtcccagggcccaggatTgAgAAGgCCGTGCACTTGTTGTATCTgAcTgGATCAACTaggTAGgaACggGgCGgAAGGGGACTACTCGggaAgtCttcgGTAggCgAATcAACgTCTgccacAggggCctAaGcaGATgGTGCaCCgTcCtGcGAgCAcCAGGTTCGCTAATATTCCtCAGCTAaGacATcGGGTatCaGcctccTtGCGCGCtGACAAATGGCTTACTCGATGGGTCAAGgATGACACGgctGgactccaAcTGcCCtcgTgCcCcgGGTCTcTtCcACgACcTGGAAGGAAgCTTGTcCAGaCTGCGCTTGggTGTcGCGAtGgaGAAcgcCCaCGACGTTcTTgTGCGAAATAAaggaTggATaaCGCCcTtggccccctaGGagtTactACCtGACCcgTctAacTTGcCcTACTATtaacgccgctgggcgagtcggaGActgtAgagTTaCcTCCGTgAgtcGaGgATTTGctGcaTgaacccAgaacggGCTGCgGttgtgcgagatcgggccagccgccattcagccctatacaataaGacGcccgaCggggggggggccgctaagaataAgcgATGGTCTACGGctCggccgcTTATTTgAcTaCtTtAcGtacgtAttgcccgGGTcgATATTACGAGCCACTGCATGgccggacgaCgtagacctcgagcgcgtgggcagggcgaaaatcAgcataccatgggggCaacgaccagcagTtgGCATGcgTACAACggacatcaacgtaTccggaatgccgggTaggccgTgacgATcagacACGCCAAAGCTTcgtgaTGGCTGTGGCGGCGAACAGgtTCTcagacccTcCgCCCcAgGaaccTtccGCGatCgcTcCGGcAcaAagCtcatgcCgGgTTAAcGTCGGCTCGTagcacTCACTaGcaGATGAgATTCGAGTgaGTCCAtTGAgGATAATTCcCTTACATCGGATTcGAATGCCGAcCcCTCCCCGgTGCTAAGATTGTGacACcgTTCTACgGCCcATGCCTgGTTTTCTCCACCGACTGCTGGAAAAACGtCATAcCgcATggCaGAGGGTTGGTTTcACCCCTATCACCTGTGCGTGGTCACGGTCCCCGAATAATAtTCGggttAACGGGCgCAgGTCgAcCcAtccGTggTgTccATgcgatGaCAGCAcTGcGGgGGcCCATtAcCCAGGGCACCTcTCATGAATAcGGCgATGgccCcACgGAcacGTGGAAAGGCTCTGGGTgGAGTTAATATGgccgaAgTtgGccTCccGAccAgGCAaagCTGGagcccgagcggggcggcTcGTcggCgcacgccggagcCTtgGCGGCGtGGTcGAcGTGTCgcGCTGTGGgCTATCAcgACTccAgtAActcctctCATGTTgGCAcgctCGTggccgCAGTTgATTAgGTGAataccGTATCCGGCcgATTGGgtgTAAAgGTGTTTgAtcggaGGAGTgCaACgCGTGcAACcGgcAGAACGTAAAGGTTtGTGGGAACcttacttCCAaaTCcTAAGAAcACGCTTGGCTGaAgAacCGctcCagAgTCATtCTCcGCCCTTGGTCGGCTgGACTGgCTGCcTggAGCgcTcgTGGAgcCgTCGATgGctGGgCCCaGCAGTTcCcgtcaTCGTTTAGAgggCAGTAGAGTcgcTATtGCGTCcCTGATTAGTTCAGAATCCTCGtgGaTaTCCaTctcTTGATTtcCATGTgcTCGCGCCAcacccaCTTCgACGTCGACcTCcTcCCCcCGcCgTTATgAgGcgtCTATACgccccTTTGgCGcaAtgccagctCcaggCtTTGTCGGAGGCCGGATGTTTCAGCTCTACGCGCACGGAGACATGTCTTGCCcGTCtAGGCGaccctgattCgcAgTCCGCgtccGGTgcgtccggcacattccACgcTTccgTAAGGTAGCACTTACcAgcCTCaGaAGgAGTGgCAGACAgTCGAGTTGgGGGcTgcTCTAGTAAcGTcgTAATGTGCAaGTgGAATCTATCCAAACgTGcCagtAAgCAaCgagCGTCcgccCTgcaTgggATcacTCTGGTGaacggTTgATgTgTcgcTCGCGGcGgCAATTAGTTTTATTGcCCGAGTTGgCCaTCGTACTGCCGTACtTCTAACCgCcCAATAcTTGcATcGtCtAcATACGAAAGCcCtGaTGTcgAcCGGgCTGCATTGGCGTACTCaGgAcaggcctCaAtTgAtccgcgggctCTCTtGCGgGTAttcttcgcCgcaAgTTAtcgCGAgggaGccctcggcGTgtcccgCCgGtccTCgctgtctgacgGGAaggcaatggcCaacgacTAGGTCTTGctggTCTGTcGGATCtggtgcACcTTTatATTCGAccatgAaacgTCCcGCcCTGGctgAAAcaggTgcgAGGTTGTGgTtcTgcGTAATtccAACCCTggAcgGgCTtcACAgAcGCATTTTTggaaaGTGCACTgGCGCTATTgtGGTgTGGCTAgggtTCgcTaCGcGgcGCaTGGgcgaacctCTGtacATCAGCCgaTAAgggggcTgcGTGccGGGAcAgcgGgTAATggtACTAcAATTacTaCTTTtTGCCgGAtagCCttcaacacCTgcctcctTgcAgtggTGaTaGgTcAcgAATagcgtaGTCATcTGGACTCCATggTGcGCGTcCGAACcAGCcCCCCccctcagccgccctcggggtaggggccctcAttgtaTgtCTCAAAaAAGCAGcTTAgGGCTACgtcGAcCaTTAcGACATCGAGCGTGTAgTATGCGGGAGGGcAggcGGCCccagctggCGcTcagTcaaCgGCccCgTggcggggaCtctgccTgtgGAgccggAtgcGGGCCAACGcTggTTTTGGATGTgGGGCCATTGTGATGTCAGGCCACTGTGTTTTcGCCTTCTGTCGaTCCcCCCcCGTGATTCcAAGAGcagAcgtCATACAGAAgCtcgTgacgAcgtcGTcGGGGGAggaAcgAcCCGGTgAgTCcgCGAATTGTATAGTtGAcTATAgGcTccagGcggccGTGAgaGgCgccgTGGcCTTgcCgCGGCTGACATaGTgcAgAAcATgTcGATCtggaAgggTCgTCGCgAAgatgCGCAcGAGagCgccatggaggtgcgggacttCAagtcctgGcgcgcggctaTTtTctgatccgccAgctggtcacgtTCctgccaggtcacTCcagGCTGAAgAtAtcctcTagcGggcgcccaTcccggtctTggagggcctcccgacgggCccgcgctcGgCccgcggtagggtccggTcccccccccttGTccCTccgataaggcaTgTtcccaaattcctggacccgtccgggcattatgcatagGcagGAcCacCTtcTcaaTgAggtgtgcggggcctctccAATCTGcGGAtAgTGggagacgatgcaaaggatctgCcccggtcggTcgtcgagcgGaacaaccgggggaatcgaaaagcgacggtcgcTgACAGgTTATGCGTCAGcCGgTCAAGACCgTGAGATGGTgAAACACGACCTTATAAGTATATGGCCCAtGGTGTTGGAgCCCTcTTAACAAcTAGATAcTAGCTTTtgACccGGgaGCCACGACgttcCgtgTGCGAgAGCGcGATAGACgTgTGGCATACaAAcCTATCgCtcAccACaaGCTCGCggggtcgccgtcgCTCGATCggCgTTATccgctccggaAgggagcgtagagaCtgaggctaaAacctaTgGaagaTtgccccAgCctagGgACGGAGTcTAtatTcctcgggtccggcgaAgTCCTgTAGGCAGCATGTCAgTATAAAGTACAGCGcCGTtGGGGgCCCcGGgCTCgGtCgcGtcCCTTGGGGTAcCTActGGcGTggCcggcGtGgtAaGTTTTGATTGCCGTTCCAAACAGGCGAcgTAAacactAaacaTGccaggAGcCTAggTcAgtccgggCcggcaatGggCttcCGagGACgCggTgATcCTAGAGCATgACACCGAgggGGCTATTGTCATCGAagAATAAAAGCTAATAATCTGGgCCAACACAAGAGTACTTacGgCTcTCAGTTAtcgGaAGGGTTCTAGAtGCTGCGcGcGAGGAAgGgcgCaGCtCTcGTGgCTtCtcctgtgaCcccgcccggtccgcGctcgAcGcctcgcgacccctctaGtgctaTctcCGCTCTAGTTgTGGAgccCgGcCATCGgcCTTAAcGAGcCGgtcTcggtctgCcgtGCTTCCCggGTgTggCCgcTtTTAtgTtggcCgAtcgaAccacGtATGggccTCCtcGAGCCGtcgaGTCTTGgAATGCGAATCAATATcTAGCcTAGGGCTGcggctccaCCTTCTAGtaCTCggGtggcTTgggTctcactGtcaGtTGcagagacccgGggGCACagAAGCGACTCCCGgGgGATGTTTAGTAcgGggcAAGTATGcATCGaAcgCctgagCtccgAACTATAACATTCGtGCTAGTCcgctgGgagactGATagcgccccatcaacgaggcctCaagAtCGAgttTtccTaTgtacGtggTgtttagttatCgCgctAgccccacaatagGagcctcataccgGggctgGGcAccccCTgtgcGccGctccgcgtTcaCcctGCcTACCGCCAGGTcATAGGgtCaccactgaTtAgCcaTCcaGggaacgaaaatggcctcgtaCggcaGTATtGCAgATTTAGGCGtAAAGCCTCTTccTCAGgcACACgcGGcTTTTCTgCATCAccCAGcCCTCaACGCACgccGCAAAAGAAGggCGTGtAAAGTGGTTTCGAgCCCAAGGAGATCCTATGCACgAtCgcaccgCCTGCcGCACgTgaCAcgcgagAcATactcgGCTgTCGAgAGcGCcTGTTGcgGcggggctgcGgcCTctcgCCcgcACCGgTTCgcgcCTGCTgcgGcgatctacgaATAtTTggTCCAaCcgaATGccaaaCcgtggggtagaagtgtcaatagaagcacaccgtccccccatcgcaggggggttcacgATcctctagCcagCatcaTaaCgGGtctgCgcCatggcTAACcCcTgcccgtggagtctcTTTCAgGAGCgtcATgaTcCAATgtAccGCtcTCAcCGttCcAcCGCCTgcGtAGcTTAGATgtGCGggTcCgggggGaAAAcATGAagTAcGTCGCaccGgTCGgTTCgagcCaGcAGCGaAGTgCggcgGGTGCATCCCCCCTTATTGATATCGAGCCtCCggaccggGggacGccgGTTAACAgTGAGGCACTGGTtcAGAGGcTgtacCtAGggGGTcctCAAgATgGcGgAGGTACccCAGGTGTAcAGcACTGACCgGcATCTCTGTTGAGTCcTCGCTcTGATTcTCcTCTccAATTcAGTTAggTGGTACCTgACcTcGtcTacTgAccGtgaTacTgcgtAAcatggcctgatCgGGttacGcgtgggTTgagAcCGcGgcACTgCAGgTtcACGTTTccccCGTCCGCCCGacGTTAgCCAGCGTATcACGgGTGgTTGCGGGTAGTTGGATCAGAAACATGACGGCcCACAGTgCagAccgGtTTcTACGAGacgAAATcGCCGGgCcTGgATCgGTCGAgTTCGGaccGCCaCAGctTTcGcTACcCTGCgTACcATCgcgGTcCTgCAGCCTagTACAAAcGCTCGATcATCGCGcTggCggGTgcgCAgGGctaGCACACGctATGcggctgagtcCaTgTCGaaCTgATCaGgTcCgggcACGAgcATTTCGCGcCGCagGCAGCATACgggGccCagcccgcgCttGAAGATgGCTGTCCccCtcTcTcTTcCAATCCAtGGGCCgAATGTCAGAGCgTACcccGATTAcgTCCcTgGAgGAAAcTcACGTCgAGAgaGggTgtCcAAgCgCGCCGcgTcTCgGCccATAgAtGAATAcgAGAAggccgGGCATCcgTgggtcccgtggtcccaActTccgggTgTatcgtGTCGTtcAcGGGcGGAATAGGTTAaAccAACAACTTTAaACCgGgcATCcTGTGAGgCATaaGGTAGAGACAAGATTACcCAGgCACcggAataGacGgGtTAGGGACCCGAGTAGATTAATTATAGCgtCccAcACggtcTgctaaGcgggccGtgGCAcggaAgggcggCATCAACTCGCCCGTAGAGTGTCGTcCGTGCgcTTTCcGgAAcATCGATGAcCGTCAATTCTTAcAATCAATCGAGGATAAGTTAAGCCGAAcTgCACTCATgGGCGTgCCCGCGTTACTGAgGAtCcTgacggtaATAAAGCTgCGAtGTTCCACGgGGAGAcTTagaGcaGAGTTcGCctaaCcggcgCCccAAgtCTacTtgcgtaCCCCTTCcTATGcAAaTGCTctggCTGTTGgCcagagctaGTcGgtagcGtTGTcgtgGGCGTccggggGACCGCaGTccATAACCGCGCgCCGCTAGGgttagcGcagcCCcgGgTcCaACAgCCTCGGTGAGCgTAccTTGGGGCCtCgCTAgGAgGCCATGTCAGGCTAtTaatgggTGTCgcTATCGAATggGcATtccgCTCAAcTACAaACgGGTCcGCGCtCGAAGGgAcTTCGTCTTATCTCCTTAgtagaATccacgGgTGGGTGAGATCAGAGCTACGCCGAGCGGGACggAGATAgAggGGGATGTGcGGCGaATGGAAcAGCGTGGTGGTCAGGTCCGCTAATGCCAATTCAGGATAGCCGaGaAACAATgGAAAGAATCcGATAcCGTCGACTGGGGCcgACccAAGGTaGtTcCCTgGCTACATCAAgATgctCAAGTgGGtaGGtgtCCGAggcaTtcaTAaCTCgGGTCgcAcGAGGGtcgaagAgcacCTTTccacgGcCcAcCAAatgcCgGTCAtCTGACGTGGTAAaATTgccTGcTCGgccCgGgGAgaCgCCcAcTGATcCCCtctGACACGTCaGGtggaGGTAGaCCGgTCATgCGGTGCtcTAGAGAccCTTAAACGAAGATtcGtCctCATTCAGcCccaATCTCGGCCgggAgccTGCaCatccTAGGCTAgCtgGTTACAAGCAGCGGCTTGCCAGGGTGGAAAcGgGGCCgcaaCTTTCCCGGGAA
>trimmed.Xvv1381.SRR494499
TATCCagTCAACCCGcACCCCgctagtAggGCGGgCTCCCACACTACCacacActCTAgGgGCCcaacTcGcaccggTacaaAgcaCGgTgagtCtcCgCAGAGTGAcGggGcCCTCAGCcTTAgTCacCTAccATgAGGATcTACTcAgTcGgtAGggACGTGAACGCCATTTgTGcGGtcTACGGgcAaGCgtTTCgtcGccGTgCGAGCGGGAtATACGGcGCCTCGTCTTGTTTCAtTTAAATtaCAgTCcCGccTTTcTTATTCcgaggTgcagCAcAcaGcgagGAcgGtCGcTTCGGACgATATGAGTAGcgcGACcTGCATAGAGgGgCCgcggAAcACgtTGAGAggActTGGATGAGAACgAgCcagGgTTgAGGGtcaTTggActACggtcgggcCGGccgtcccTACAAcCctTAgcgctacaaggggagtacgccccgcCcgccgcCcccggGGtTaccAcGagccaaatcggcgcggagtgacattgggcaGcccgaggcaCccagagcttgtgaccgggATTAAcTAaaTTGgAGGCCTCTAAAGGTATAACCTCGTgGGTGGgAGCATAAAGTGTTACTCCTGGAGATTATCGGTCTGTTTACGTTTGTATTCCCGCAAGCCCGCTTACCgGGCTACCCcATTGcGAgtgcgcgcgCTCAAGcCATCgTTgtcgtcgAACTcaGAGgaTagtTgATagGGAagTgGTgTaccggGCCCTGtcTgcCGGCTAcTATgTcAtagcgcgcaGAGAATgTCAGCAAAcCGCTTtaAcCcgCTGCGGcTgggGGTCGGAgtcgAtTagAtgtgcgtctggaccgctcggaCaTCccAgtTtctggGggTCGTTccAATCCgTTGTcGgcTTTACgAgGgGTTCTACgTGcgGTAGGcACcTTgCcgGcTaGGTAGCTAgATCTGTgTACCGGAgTGAGGATcTTCTATcACTcACTATCAcGGAAAAATGGCTTCCCCAtcCcGCGcccGcCGGCAacgGgcAcgAagccCgacaaaaacaactaggccCTagacgcatccgaccggCactcttgGgagtgcccccTccCcgcTtggCcgccCcCgcCcTccccgctagcgccCTcgCaTATCCagcTttggcggttcgcgcgcctcgaaaGgGAGgCAtTccgcgtcGctgtgcgtgaCaaGCCGcgtAgcttgCGcGCcTtCGGCGTgtCAATCCtggCaCATCGgTAcTCaCcCTTTgCCTCTGaATATGCCATTCCCCGACTTGGGGGGCTTTGGCCTTCTTAACGGGTTCTTTGTGCTTgATGTATTTCTGTTCCACAcAGACATCTGTACGACTCGGAGGCAgtAAcTAgGTccgGGGTCCAGtTAttAgTTGcTAaCctACCCGTTAGCCGGTGTcCTTCGCCGGCggcGCCTAGGAATTACAAGGGcCCcGCGaaagAggcGATCgcgTCACCACATgAAgACTCTGAGTGGGGGCAATATCTAgCATCGgCCAAACCCAGAAACAaAGtcGggGtctTgccTcAcAtACCTCCATGTTgTTACCGGTTGtcTATtAAGtAAGAGccGCAAATTTcGtATTTaGggGGGcCTcCCGcCTcCgTTACCaAAGgaGAGCTGTAGACCGTgTAcTCcTgACTcGCgGAcCGgCGGACccGCGgAGTTCTTCTcccTGGTCCAgCcTTAcTCTTAGTCCGCAgGCGTcTAgcGCGtATGGCATTgCcGGCcATCtgGCgGgCTGTcGgAcGAgcGTgcggtTTgTcGGcACTCGTGCTgaagcccacGgcagcgacGTCCGAATcCGGTGggggtggtgtcggatgcgtggcgccgtgcAGggggttggtggCtaGCtcgacctacactCCTgCGcCtTCACgTtAccaCGCCGAcTcAcgCggGTGCgTTATATCATaTgctgGgGACTGgCtAATggtccGAAcTGTcTTcTACgGCCGGTATGCgtaaGGGTCtATCCTAGgTAGGcaCGTCacCgACCTgTCcTGTCGcAATAATGcccggGTgAAtgCCCAGGcTGGTgCGACCATGCtCGCCAGACTGGcTGAcTCCTAATtCcaTTACCTCAaGATTGTTCTGcAGTCCCGACCgAcCTGaGgAGCCcAaGTCGTTCcaAGTGTCAGCCGGTGCCGCCCATCAGCCTTTTGGACTAAACATAGGGGTGCAACTCAGTAGAGAACGAGGATCTATGGGCGGGCTTAATCggcccgagAttgaAccCAgggaGaCgAcacgGgggCacCgccccagacacGTttTCGCgGTaagGgctTAGCTAAATGTtccTcCACTccTcAATATAACGCCCGTTAAGgGCtTCCTATTTTTTTCCTAATTGTCGTGGCCTTTTATGTTGACGCCCACGCCTTCATTGACTGCAAGTCCCAgGAGTtAcAATAATGaTAtCccagaccaACTAAAAGAGCCGGTCacaAGTCGGcATCcCCggcTATCCTtcAgTGTgcATTAGTACGtCcACAAggTTTCTCTAAGCACAATTGGGCACCCATTTAcTAATAATCGGGCGCTATAGGGCGACAcgTGgCTgCAGcCCATTTGTcGGCAggGCtTaTAAGcGtCTcCcgccGgggGCCGTGCCGAATTcGcTCCGGACCGTAgTgTGATCTACCgAAAAtcccTGTAGCGGTGCAAAcAagTCTCaggtgAgAacATTcagAAACATcgcggATcccGaccgaagCGgcaAggcgTgtgcggggttcacagagcTgttgggtggccgctGtggcgtacccccgccggtccaccattGagACcgAtcgccAccGgctaTggggGcggggcaccTCgCgccCttcctcTcgcatTAaactatAttgcAGGATCaGGtACctgcgGCCgCtcatcTAAGGcgTCCGGTAgCCAAATGTGAATCTTCGAGACATATCgCTCTAGAAGATACAGCGTTCCGCAGGTCTGCCcggGgcGcGgtGgccGGaAAcGgccAcgGAATCGGtGacAAggggAgTcggagacCgTCtTCtAAGgcagTcggAgTtaagtaggCATTgATaGcCcCTgcAtCcCTggttgtcttcATAaCAGggaTgaccggccgTctGcgcggTtgtttaTCgGAAtAgcgggccccTcaaCgTatTAAcgcagctggcgccggccggtgcgacGAGAtggctATAGactAATaCggAGaGTCCACGACCAGAcGAGGCTGGCCACTGCGGCTTGAGATATACGGCACGGGTGGAACTGGTTATCTCACGAAGGCTCCATGAgcCCGATCTAAgCGAgaCcCGATccATGGTccttaggttAgagcgggctGgTGGTTcgCcAgAGATCGgcAGccgTcGGAgTggggccccgaccgggCTGgTGGTTCTGAGCGCGTTCCGGACGTaGATCGTCGGTTTTAGTTGTTCCGTTGCTGCcCTGCGtGGTCcGcGgCCtCAtATcCGGCTCGAcAGaaCctGgacTAggCtgGccCCTTTTAAGTCAaCGTCCCTACGTCTgATAGCcTACTTATTGTCGGGCTCTCGAGgCGCCCCTcTCATGTTTTCGAATCTATTGCGATTATCCAGACGGCGCCgCTCTTACGACGTTTCACTTCGTCATCgCATGTTcccATAgCTCACCGGTAggCGAcCaaATAcGtcacgagccCCtgtcAAcacCACCAgTGGCTAACgAcATGAATcCgtcgaGAtCCggtttGCACacAGctctgatggTcgcCTTTACtaTAGgaCgTCCcggccgggtGCcAtgCGAGAtGCGaGcTcCtGgcCtacgcGgTttgCacccgCCTAgCTcGCTCGCGTCcATAgAcAcCGGCTCTGAGCCCGcTTAGGCATAAGGTCCTGgGATgcCTGaGcCTcATTTGGCGTacgaGCTAATTtATATGGGATAAGTCCCGTCAGCGCGTTACtGtgaGagtgcaggTctAgccgtgTtcgtcccgcccgcCccTGCCGTtgTAgCacgcCAtTcTGGGAgAcGActcccgGgggtggtcctCgccccCaTAtgaTCCggcgctccgTcctgccggTtACggTCTTgAAgAaccgcGgCagccAcgtggcacgggGtttgctccCCTcaaTCCAGTGAgCGgCTTgcAAGGTACATTCTgAGggAAgACCCGTTcCTTATGACgGCGGcTgGGtgtCacagtaaatttgttcgtttacattcgggaccggagtattgcctgagacggggCttgacaaggagacgttCGcatacccaatcAcccTacggcgAAAgTCaGTCgacGggAccactgtcCccccgcacccgccTCGggccgaTggggCcgAAgCTTGGCTGGagccgtctggAcgAacTccgggcaccAggggggaacgcGcggcgatcGgacggcccggctttcttccgccGaCtcgaTAgGttgaaAgccgaatgagcctggtcAgaTccagatggtaaCggcCGCagggggAGCGGcgAgGCggTCTAGaccctgTcggcttaCgaagtgAaGgcaacgacTgcgccggcgcgtacgcctctacgcCGTtTGTCTCTGAGCTTACTGATGGCAATTcGATgtcaCgGcCagTgccgCTAggGGGAAcGaAcGCGGGAcTATTGggAtCCAgTcAcTcCattgAAAAGatCCACTggcGcACTTGGgcgtccGTCGcgTAaaCTGgCCgaatccGcctaaaagtagTcGaACCcAtcgTAGgCgAGTGCTccAAGTtATggagCCTAaGCcACAcCaccTGTGAGTaccgTAcCTCGGgATagctGGCTCAGaAGtgGgAaggAGGCCgcGgggtAGGcgggTAGGGCTcctggaAgACGTgcCACTggActTtCAAgACtAcgAcATAGcATACTGGGTGTTATAGGgGAgaTATgAcgCgTgTTAagTCTGCGAGCCGCgACGgcgAAGGcCCAgAaGCTAAAgGAggATGTAGAGgcTCCGCtgtCggGTgTTgACAgCcTCTGATcCgcCGACGcGcGCTgATGCTccGCTTAGTGgGgtCACCGAAAAATGCCCgTCAGTCCtgGAgGggGGGAtgTCATGAcggTattgggCTccaatTCcgcAacagctctgcgggtagCGctccaccctaCcAcagccaatACGCCccAtcGtGgCAgTtGGTCGCcATCATTATTTGAGTTGCAAcAgCCGgACcAgAGAAAcGGTAATGGAgCcATgGTTCTGGTTcGcGGGGGCCcACtAGAATAAGAgTgcAgGTATAGAAATCTACgGTCAgTAcCGAACTcaGGgAGCAgTcCGTGAcgaCGTGCgggtcccgCtCGTAGGcCCcCCGACTGCCctGTCaCaATACggtAgcccTCAgTCatgggCcaactTgAggACGacACTTgATCGcCCCTAGCGgcGgTATcTccgaCgtCcTAgGCAGcTAcGAAcGTGTtaCcgggGctagggcGtCGGtTACCgcAATATcAACGcTTTgGTAGcCCTTGcccagagcatcaacAgcTCAggCCGcCgcCggggacgcgattcacTTGTgCgaGAGGcACcAcAcGgTtGcCGCatcctGGActgaTGagcctcgtgccccggccccATtcTcAACTCTACGCTATAaccCTCcCTGGtAGATGCGtcCCAGcgTCTGTTcCAGgAcGTAtgGcAaTTAGCggAACCGTTTTCCgATTAcgGTGTGCCTCACCGTACCGTCCcACCGTAGTGtTACCgCCTCgggCAggCCTGgcgGACAcCCAGCCCTcCCTGCCCGAgGcGATATTAgAAAAGAAgGCgGAAATCGGGGAgGGCTGGGGCTCCGCCcGAGACAGGCAAGCGGTTAGAGCATGTGGAAATTTATGGAATGTTATtGAGCGtAGCACTCATgTAcgTCCAATGCctCCGGcATGCAcAATGGTgaACATTcCCGTccGgAgGGcacttAgAgggggTagAcATCAAAcGACCcTgGCTTCagcAAgAcCtGcctCgGcgAGTAggCATcTAAcctTTAAACTACggaACTCccCtACGgcAgTcCTAGTCGCCACAACATTTGAGCGGGCATAGCgGccGGGATAaGgTGCGtgaGtTGCGGgCCcggTCCTATTgtTAGacTCaGgTGCgGCAGTcATGtcCTATCTTAGGGACCCTAAgCTAAggTaCcTTCTCGTtaActCTgcccttcCgAGCAATTTTaaTcAgATTGgcCcTTCcTTTATCGctcAgcGCTGGagCgACcAcTacatactAaggCCcgcGTggCgTCGACTGcTCCACccTAGCTACACgTTCcGgGtctgAcAcccCACgAGGAgccAtGAGTcCTGCtTaccTcAcaGcAAGTTTTTGTgGGTACaTTcGGATCTTTACCTGcTACTACTCCAACcAGAAAATGCTgAtAtaGGTCcAgTtcggTTCcGTCCGCcAtGGAgcaAgAATGggtaagcgCgTTGggGCcTAGTTgAGCCCgcCTCAGCTAAACTCGGAtTCTAATCCCTgTTTGCACCAGAACCGccAatcTgAcCTTAtcgcACGACTTATTtTGGCTATCcTccAAccTcCgTTCgTCGTTATAGGCGACcACTCCggggcgGgcccCtcGGGgtgTgccccTTgAtCtggCcgTgCGGCACGAcTCCCTCtCctCaACGcTCTgcACTTcACgatgCTCTGAGTcAAAATCGGaACcAgtTTCTgcgAAAATGTAGCgAcTGgGCTTCAGtTCGATGgGCcGTAcAGttCcGGTGCTGAAGGTGTGGgAcACTCGCAaAAGGcGCCGggcTTGCCcAGTgCACCGCTCTAcgcTCTagtcgaCcgcGCcccTggcgcaaggAaaacGCGCCCCTAACCCcTTtgtccaacCgacacCgcTAGTccctcaggcaccgGgCTaCaTTAcCgTGaGacgAccTTgTTcgCaTGCTaggtaatcagcggaggcGgccCCTTAcCCccaTAAGCctCgTgtcgCAgcaGTGcgctcTtgGTTAgcTACgAggcGCcGTAgTGgGACTTTTCCCGTAgatggAcgAcGCTGATACCAtCTCgggCGcgCcCTGGcaCGCCTTGgTGGgGCGtgcggaaAAaGgCCCagcgCagaccaagtaaTActgAcgcCgCCCTATGGCGCTTCCGTAGaAGcATAggtgtCTTGGTCTTGCGTGCTGTTGGGATGTGCTCgGCATaTCcAGCcCGAAGgCGtTgTTGCaGACgTGCGGTCGTatCCCGCCGCTCcCGTCAGTAACTAAcgTCAcaAGAATTGCTCggcgAttcTgaaCCCTTTgcCTggATcctGCAcCgcGTgggcgcaTgacgtCGctaTaAGgcacagGCgCtGCgGgTaTGAGTtccGcCtgtcccgcgctaacTGTTCTTTTTcgaCgTTCTATAGCCGcagTggtcCCGCAAtcCGAAGGTtTgCgtggGCATTccCTcCCTTTGTAGGGtTAcctgggCgcgCcGCCtGgACGTcCCcTTCAGGTTCAAATGACCAAATcAcTcCAGCAcACaCCGCTCCCAAGAATGCACATgTgCcAGCTAAGCTCCggTcggGGatggcgctcggtccgccATcaAtAGTGCACTTTACTGTGAGTGGAGACGGTACAAATCGgATcGAAAATgACCTTgTGTTCCATCGAAATTTGATGAGAAcGATCATTTTCTCGTTTCTAGTCGCCTCCgCCTCTGACCCCATACCCTTTCTCCGCTGCTAGGAAGGGGCTTcACTGgATCtTGGGCtCcgTCGTTGATcTCTgGGAGcCgcGgGAcGcgTgACCTCTTAGAGAGAAGAAGgTGTCcAGCgCTcgggccaaTtAaTAAACGAACAACtTcTCCACCGAATTTAAGTCGCCGGgTATGTATGCGTATGCTATAgGcgTgCGGAATGCcTTagGCcAAATATTTGGGAAcTgtgcTATTATTGcCCCTCGGCTTTGCcCccATTAAaGgTCccTGAtgcAGgGGTcCgCgATTCAAGATGgTTCGccgTgCcGTCAGGTTACCGATCGTCTgGACCGGTGGGCAGATCGGGTAGGCATCGAGTGCAATTCCAACATAGAAcGATGAATCTATcCTATCGAAgTGCGCAGCCGGTATTTCTTTATAATCTAAGGCTCGAGACTAcGcTGTTTTGATGTGGGCGTTAAACGTGCCAAAAAGAAAGCCCcActcagggaccccggcacgtcggccGgTGTATgaTATGGGATGATcTAgAAACcTCgTcCTCTACAGcAACTGGACCCGTACGGCAtttggcctTtAGCAaGAGCGGTATCGAgCgccggTgtcgtcaGaTGATCTGTTtTTCGAATGACGAGACACCCgcaAcgcGggcCGcaAccGGcgcgcgccgCgTcTagcTAttTCtATATCTGAcgCgAcACGTCGGgtcCTCaAATGTCAGACACGACgTgTTCGGGTgtCcTAtGCcctCtggggaCcACgCgTCGATGAcAtCcccgcaGgtGCGGTTaAGggcGacAaGAAgTGGCgCATCcGgcctaacCccCTCgCcccatgtaggggtacacgggaccgcgcgcagaaagtatagttttgtacgcccgccttgtCAagcaacacaaggcgagaaaggacacgAAacccgaccccgCTATACtCgtcgAtcagatAcTggGcgccGGTTCCTgttctgattAcAGAGaATACACGTgGcAgCCTGCCTCCGGTcATAGgATTCCGGTCCCCGTTCATGTTGGTTCTTCGCTGGGAGCTTCTGGCGcAcTAACTGCGAGGAGCGggCGCGGTGTCCGCCTGTCTGGGGTGGAAAGTGAGCGATAcATATATAgGCATGGgAGTTTgGGgGgAGAgaCATCGGcGAgaCgGcCgCGcCAAGcGTTGCTgTTAGAGACcGCCGGAGAGCGCTGTcaaatAAGCCAgGgAccATgGtcaaCcgtcgtCggggaGcCGGtcTggGCCtGcgACGGAGTccccCgCcaccAggCTTCACAaaTAGGTATaAACAgAcgTcCCCGACTaGAGgggTatgcCatcggtgaccagcgagagagtggcCGAcTTAAGTCCTCTCAGACGGAtCACATAACATAcTTaTgtTcacacCgTcgtggacCCTGcGAGCGAgtTAtggggCTcTcacccccaAgcggAgtTgacgtacgGCAGggAGTAGTCGcGTTACCcATCgcgggCGGcTTGcgaTCtgcCcCcaGgGAgCATggGAtGAagccGCTAgCTtTAAgGAgcgCAGGAGGCtTgGAAAcCCCTCCCgTGGACAAggcgCgttAAGTcCggGgCcacgcgcAgCgCGcgCcgcCGACggttgtcTTGTCGggggGTgAcACCACgTCAgCcAAacAgcGCTggtCAGGgTCccACAgtGgacaGtGcGGCggATcagcgctctGAGgGGCaggcGTtaCCGAagGCCgGcgGGCcATGCCaCATCGGCGATGTCaGGGTaAcCGctcGGTcctgctAGAcTcgtgggtgAGCCCgGTATccaGCcTGgATAGTACGTCcCTgATACcGcAaGTtatCActTCaGTaCcgcgctgtgctcAacagggtcgTAcggctccGgTgcaggGgCCcaaGGtCagaTaGtTtGcgcGcgacaacctttagATGATTTTTCGGTAATCCAagAACCgGAGCgACcCcTTAcGgTaGtGcCCaAacTCCAGTcCGTTtCACTgctcATtAAaCgcagAgGAGCTCAcTCcgTGAccggGCAGGGAATCCcGTGTACTTTAAAgTCTgCGATCTGTAGGTTCCGCATTCACGTCAACGCCCGTGTTGTTcTACTCTTTcAGCATAATGATGTTCCAGTAAAGTCGTTTTCCcTGTTATGGcTTgAAcAATGTTGTTCCGCCTCATTATTTCACACACATTCTGTTGCCGcCgCgCGcAgGGcTCgTGcgcGTaGTggAGGTTCCTTgATATTTTtCAGgtgTCggcAACaAATTTTTGcACcTTTGTTCgggAgtcgTcgACTGGgGTGGCCACGTTTGACGAGTTAAATCCCTTAGTGTCTGcGTAAggGgGGCCATcACgGTcCcCCAtTGACcTTTACGtCCgctaGGGATACAcTCGGCgGGGAGCCcCACtGgGAgATGCcataCAtgtatcGGcTGcGAATGgtGctccgtCgccacgggacgcgCggCtctcACCgggaCcggtCAgaCcTAggTGcGcttctCaaacgcaccgtagccggcTtgTgTCacAacgcGCTCgAgcggtcgccagtcgctCCtcccTggAggcCACcggcAggTGggtatgAtaCGcGcAGCGAtccTCtGaAACGGcGTGCtGAcGGCAgAATGCatcaAGATGTAggtGCAAATAAGtACCtccTTCTGCCGCGCTGccGTCCGCAcAgCCTACGCGCGATGGGAAGCGGGcTGCGACTAcAATAGGGTCcCccTcATAcATTACGTgGggCTAcGcCcGCgAATGCACACGTAGAAGCAGCCACGTcACAGTTGAATcAcAgcgTcGtcaCGGATGgCATCTCGCcTCTAGATTACTTCACGCATGGTTACTTAAAGTTCtgTCgCCAACAGTCCCGccTCCGTgCGCGTAAGGACTGCCTCTCCcCGATCCCGACTGTGAGCCTCTcGgAACCcAGgATCgagTCGATCgTGGAcGCgATTAAccCCcCACtgATcGTGATTTcccTTGACAACCCTgTCAgGCCccGcGGTcCGGcccggccgcgagaaTAgcGCTggTATTATCCCTTACTCTTCCGCGTAAaGACGAcGAGAATATAGCgGGCAGTAGCACACGCTCATAGgggacAcTGATGcTTTTTCtcGGaTTTGCgacTCtgGcgTGTGGTTGTcTACCGTcGaGGctCTCTgaAcTccCGcgTTCaGGcCTCTCTAgtacaggGGgAtCCCCccGTGACGCGCgcGtgcgGaGTCATCCAcGGtATtAGCcTTCCTTTACCTaGAATTTTCTGCCCgATCCCgCcAGTTTAAGGAGTACTGGGGCTGTTAATGTCATGCACTAGATACATAGGGCAATGACCaAGACCCTGTGCGCATCAATAGCAACTCCAgACGGAAAAtATGTCTgATcTcCgAGgGCCcgcctgcaaTTTTTTGctCacAGCGGATTTAACcgTATTgTAGgTGTGAGTAGaGCGgGCTTCcATCCCTAAACtaTgCGcCCCcAGAgTTGCGTGCCcctAcgAGgTgGaaCgtAGTgGTggCtgccgCCTtGCcTgAaAAAgaTgaaAATGAGGggATGGTCGACCGGTCACCTATAgTGTAgCCGCCTCGGGATCTTGTTTGCTGAACTTGaTCCgaCGcctGAAGCATCTcGATgCGGgTATTgAGAAAgGacgcgGTcgaCTGTACcAATTGCcgagCTAgTtAAcCCTtaGAAGTcAAGGGCGGACAGATGAAACGCCCGGAGGtTCGGCgCAcgCAaCTgCCTATCCaCTAgACGtatcgcgcGGGcGcGgctgcccTcggacGAtGCTTTCGgcGTTCATGcaAGcaATAGgttgaTcgTAGcCCCTGAcCGCCGAcCTGTgAcAgcTctAGTgGcAGACTaCCCcggggtgttAggcgaTGGCCAGCGGCTCCGGCCtAACTAgTTTaCtaccagaactctGaAcCcGGcgcacGcctcaacgccagggtgagggGaGCCCTcGgGAcCGTCGATGTgcgcagAgtATTTgccATACTCTCacgAacagTgggCgagcCGGGTGCCCCCGCACGACCCGgAggcCAgcgcgcggcGTCTcGAGCAgCGCTGcTTCCAggACAcGTcTgACgaTACctCACAATCCCAGaacatTTGAATctcTCGCCTCGccTcTGTAATcGTgGcaTCcCGGACTTCcCAgCACgACGgggcATCGaattCCCCCGgtGTTgTgAcaATCGAaAGCCTCccacTctGaGgagActTtcgcTGTAcCGGgcccgcagCCGgGcGAAATCAGGCCGCTCAGCTACAACCCAATGGGgggCGTCTGcTGCGATagggcTCTcgggcggAAGtCgGgTTAcGAGCgGAGAGGgAcGAGCCAGtATAAcgcTTTAATTGAaaGATATATTGGAAggGGAGtAcgGTCTGTTTGAAGCGGAGCGCTGAAAGCACAACAGATAACGCTGTTAAGCTACCACAgGGTctCATAGGCAAccTCgGTTAAaATgTAgACcCgTAGcacCGGAACGGAggcCTCGAagacgtaccctgcgatcAcctcctccggtttcGcccGCcccGtTacgcgatctAcAtcctgtctgcCcTggcgcggggaggggtgCctcaccggagaTccatggttcccTcAcCAtctcatggctatcgcaacgtcaaagtggcacCgctaatgGAtagggCccgaggccccggcgCCTTaGCTATAAtggCGgtcgCtcgTtTCaAAcCCGgTgaACATcCAAGTTAGTGtaCgCAgAgGTACCTCcCTTTCACGgGttcGggTTTgGcgcCAaTAGAgTTCtTaTTgGGgTGAAcTcgACTTAAaTGCCCCAGGAGGGAcTGTGAAAGAGTCTTATGcGCCGAAgGACAGAAATCAACCCcAGGGCAGgGACCTCGAATGGAGAAgAGcGGcccaagAggcgCAGgCCGgcTgtaacTtaCGggTccTctCcctAAaTTAAACggaAcAAcgcggcAgTGccGCGcTtcTgggGTAcgAaAGgAgagaGCgcgGccgtagTTgttAtAcTTTgaTacATGCTGTcgGCGcgGCTCccTTAggagagccgggttCgGcTTACtccccTtagcggccGTCcTcgaggccAcTTCCCTagCACTAATGTATGGTgactccATTTCTAGTTGgAgGCCTCTACCTcgGGTAgATGGGATTCGACCTAAGTACCCCCTGCcCGagtgtGcGCCaGCgCATgGgaAcggAAcAcGGgTTAgcgAaCTGcCTGcCTATACCGcAGAAccCCAAATGACCcGcAACCAAACACCgTCCGGTCAAgcggtgCGCgGTcCGccaggcgcCcAAcgCCGaTgaacATgCAgaccagcgcCTaatTgtcgtttccAagcccgTaGgTccagggagtgaccAgTaAtgcggATgCccgctggcgctTGttcggTcgatgcTATCTggTCTCCGgctTcctgGCGCTCGGGagtgaGACatTAcGcgccccggggggaggcAcggtgggtctccgaAgGGTTCtCATGCcGAgGCGACAAGGCAGCACTgGAAGAGAGCGGGcCTGTTATGTATGGCTAAAAAAACTATATAGCGTgGACATGGgCTGcTTAGGTGAAGCCAATGTgACGGTCGGaggttccgtggggaggggtcgggggGGgagCccAGCgTCGAAAGcgGTGAcCCATAACCAAGTTCCACTCAAGGCGgCTCCTTTTcgGtcTcCAaGAAAGCAGAATTCcTagCgcAcgGTCTGCAAAGgCATAACCACAGgcgcaCATCGGGCCAcTTCCAAGCTTTGgCcGgtCcgccttgagttatcGAtcccctttcgcgGtctcatAcggGAAAGGaCCTAtctacggcccttcTcCTgTGactATCTggcccGCAACTCtCtagAGCTGtGGCGACTTcTAggcAAAgGgggGCGCGAcccAATtTGCAccgacGGcccTcgaCGCgAtcGGTAcGGTTCACAAGATCCCTagCCAAGGGtTAAGCggcTcTatGTCtaTggGcgaACACGCCTCgGAAgGTCtAAGgcGGaCgCAacGgTCCTtccggggggtaAcTTcCGGATTGTGGTGTTTAactttcgggcggtgAGACCAcgTgtgagGAgggaGGGAcGcAGCAgCagcCgCGcTcgAATTTAgaCCAAGTGCGGAcTgTCgTccGGAGctCatGGACTGTTcCgCaGcgcaacccctggCtatctaCCcGcCgtgCTaccTACgTGgacGccTGGCcCGtGTTcTTCCaatTACgAaAgacgttCGTAACaCAAATTAACCCGTAAGggAGCGAAcCATCGGTGGGATGATGCCGTTACCGAgATAcTAGAATcTCGTTAGTTAATAGTctccTAGTCGTGCcacagTCgcGAgAgCcCggaCTTTTCTTCTAGcAcacCATATTGGcaAgATtgGAagAatccgccTCAGAgcGGgAcCCACCACCATGAcAAGAgcAGTcGcGtacaGAGGGACGAACTGCGCACCGTCCTcTTTGGCAACTGATATtATcAACAGCgAAgGTCTCACCTGCTATGGATTGGCGTCcCGGgCGATAGCCGTTTCAGGCCgGCATTCgCGcCCtccctgcaccTGACACCAACATAATtcGTTCTCTaAAAcccgCCGCCCATctcGcTgaGACgCccTgGagTTCGCTCCTAcGCCCgGCTtgcGgccCTACCTctcgGCTTCTACCGagctcGCgGGgGtAtgaggatcgGgATggcgcgtCtCaTaGaGGcGcAtcgCgAGTaTCACCCGGTcTccgcagGgctCCCgCCCcCTACCTacGCGccAGATACCATggAtTCGgcCggGggggcgcTGCGCAAGTCAccTTGTGACGATAGCAAagtcaTgAGacaAGcacTAGcCcaCCgtgGccCacGCaCCATCGagGGAGTTCACGACTAATCcAATTATGGGGTTATGTGGTTGATCCGGATTTCTAGTTGTTGCCGttcgCTCgccAGTTggtcAcCCCTTGcgTgttggtaTaACAGGGcCccGcCCCTgctGAacgCaGCCCACaAcGTTCCCTCAACacAAgCTCCAAATAGCCATTTGgctgGGTAcCTgCGCgttgtgaaTCGCCTTCTgCaAgtctcggctCATCTCCTAcACCTACAGTTCTCTTCCTGTGCCGTGTTCCACGGTGCTCCAaAGTGCAGTggGgacgGATATggccgCGTcAAGGcgCcTcTCcctTaAtCCGTTGTGAtGCGAAATAacgggctggcCcGGGcGccGGaTACCGACAcCAAATtgtCATcGaagggtCCGCAGAGACCTCTCgAGAATGACTAACCAatcgcgtggctgcgcgtacgaTCcCACCAAGTgTCcTaaaAAcaGGGCGtTGGaAGAgTGCGACCATCCcACCACCGGTGACGTTTCTCTCTTTCCTCGccACACTTTCACCGCCTATtGGCCTCATTTCCGCActCATGATCCCgGGGTgcTCCTGAgcaATCACcggccgggggtgggacagggCATAGTTACTTGTACGTTTGCCCCATTCAGACCCAAGACTTTTGGgGTTTGCCAggtcGCggaaAAGGAGGGcgtCCcCTtGCGGGGGGCGAAAcgAGGAATGGACTGTcgAGAaATTCcgcggTgAgATgCGACCATACCgtTTgaGGATAtcCGCCGCCgGgcagcccccctctATcATATCCCAAGgTTcACACcGTGCGgggGAgTcGGTGCgGActcCTgtgTaccccctgtctcCcttCgcGtccTCgAtGcagccgTGcttgggctcgCcAGagcagtaccgAtcAACatgggcAGTTAAGcaACCTGATcctcccCGgtgTcgcCTGCCGgGcaCCGTGGTGGGTTATGaCCAgagagcgtgtaccagctAaTgGtATACAGgTTGTCAAGAgtaGGAtTCgCcagCTAAACTAactTgcAAGTCCcTgTGGCgtgCACgaTACgatCcCATcgcACgctggcTTGgTCCgTacGAGTAcATTAAGGcCTcAGTAAcaccaTCGgGAtCTggCcCaagccGGTaGtTTGCccGcGgtctgTaagaGgcgcgcCTCGCgcACCGTcGAgCgAACTCgcATGGTAgCTAGGTTTTgAcgggcCCctgAgcTgCTggcgcggcAgggTTcCcggAAggAcggTtgagaccgtttcgtggctggccaggctgcTgcCTTTaCCggTGCCcagggAgcatcccGAAATTTgGCCAATGgAACTAGcCAGCGCCgggtCcccCatgctgCtgaactatggccgttTctTtgtcccagggcccaggatTgAgAAGgCCGTGCACTTGTTGTATCTgAcTgGATCAACTaggTAGgaACggGgCGgAAGGGGACTACTCGggaAgtCttcgGTAggCgAATcAACgTCTgccacAggggCctAaGcaGATgGTGCaCCgTcCtGcGAgCAcCAGGTTCGCTAATATTCCtCAGCTAaGacATcGGGTatCaGcctccTtGCGCGCtGACAAATGGCTTACTCGATGGGTCAAGgATGACACGgctGgactccaAcTGcCCtcgTgCcCcgGGTCTcTtCcACgACcTGGAAGGAAgCTTGTcCAGaCTGCGCTTGggTGTcGCGAtGgaGAAcgcCCaCGACGTTcTTgTGCGAAATAAaggaTggATaaCGCCcTtggccccctaGGagtTactACCtGACCcgTctAacTTGcCcTACTATtaacgccgctgggcgagtcggaGActgtAgagTTaCcTCCGTgAgtcGaGgATTTGctGcaTgaacccAgaacggGCTGCgGttgtgcgagatcgggccagccgccattcagccctatacaataaGacGcccgaCggggggggggccgctaagaataAgcgATGGTCTACGGctCggccgcTTATTTgAcTaCtTtAcGtacgtAttgcccgGGTcgATATTACGAGCCACTGCATGgccggacgaCgtagacctcgagcgcgtgggcagggcgaaaatcAgcataccatgggggCaacgaccagcagTtgGCATGcgTACAACggacatcaacgtaTccggaatgccgggTaggccgTgacgATcagacACGCCAAAGCTTcgtgaTGGCTGTGGCGGCGAACAGgtTCTcagacccTcCgCCCcAgGaaccTtccGCGatCgcTcCGGcAcaAagCtcatgcCgGgTTAAcGTCGGCTCGTagcacTCACTaGcaGATGAgATTCGAGTgaGTCCAtTGAgGATAATTCcCTTACATCGGATTcGAATGCCGAcCcCTCCCCGgTGCTAAGATTGTGacACcgTTCTACgGCCcATGCCTgGTTTTCTCCACCGACTGCTGGAAAAACGtCATAcCgcATggCaGAGGGTTGGTTTcACCCCTATCACCTGTGCGTGGTCACGGTCCCCGAATAATAtTCGggttAACGGGCgCAgGTCgAcCcAtccGTggTgTccATgcgatGaCAGCAcTGcGGgGGcCCATtAcCCAGGGCACCTcTCATGAATAcGGCgATGgccCcACgGAcacGTGGAAAGGCTCTGGGTgGAGTTAATATGgccgaAgTtgGccTCccGAccAgGCAaagCTGGagcccgagcggggcggcTcGTcggCgcacgccggagcCTtgGCGGCGtGGTcGAcGTGTCgcGCTGTGGgCTATCAcgACTccAgtAActcctctCATGTTgGCAcgctCGTggccgCAGTTgATTAgGTGAataccGTATCCGGCcgATTGGgtgTAAAgGTGTTTgAtcggaGGAGTgCaACgCGTGcAACcGgcAGAACGTAAAGGTTtGTGGGAACcttacttCCAaaTCcTAAGAAcACGCTTGGCTGaAgAacCGctcCagAgTCATtCTCcGCCCTTGGTCGGCTgGACTGgCTGCcTggAGCgcTcgTGGAgcCgTCGATgGctGGgCCCaGCAGTTcCcgtcaTCGTTTAGAgggCAGTAGAGTcgcTATtGCGTCcCTGATTAGTTCAGAATCCTCGtgGaTaTCCaTctcTTGATTtcCATGTgcTCGCGCCAcacccaCTTCgACGTCGACcTCcTcCCCcCGcCgTTATgAgGcgtCTATACgccccTTTGgCGcaAtgccagctCcaggCtTTGTCGGAGGCCGGATGTTTCAGCTCTACGCGCACGGAGACATGTCTTGCCTGTCtAGGCGaccctgattCgcAgTCCGCgtccGGTgcgtccggcacattccACgcTTccgTAAGGTAGCACTTACcAgcCTCaGaAGgAGTGgCAGACAgTCGAGTTGgGGGcTgcTCTAGTAAcGTcgTAATGTGCAaGTgGAATCTATCCAAACgTGcCagtAAgCAaCgagCGTCcgccCTgcaTgggATcacTCTGGTGaacggTTgATgTgTcgcTCGCGGcGgCAATTAGTTTTATTGcCCGAGTTGgCCaTCGTACTGCCGTACtTCTAACCgCcCAATAcTTGcATcGtCtAcATACGAAAGCcCtGaTGTcgAcCGGgCTGCATTGGCGTACTCaGgAcaggcctCaAtTgAtccgcgggctCTCTtGCGgGTAttcttcgcCgcaAgTTAtcgCGAgggaGccctcggcGTgtcccgCCgGtccTCgctgtctgacgGGAaggcaatggcCaacgacTAGGTCTTGctggTCTGTcGGATCtggtgcACcTTTatATTCGAccatgAaacgTCCcGCcCTGGctgAAAcaggTgcgAGGTTGTGgTtcTgcGTAATtccAACCCTggAcgGgCTtcACAgAcGCATTTTTggaaaGTGCACTgGCGCTATTgtGGTgTGGCTAgggtTCgcTaCGcGgcGCaTGGgcgaacctCTGtacATCAGCCgaTAAgggggcTgcGTGccGGGAcAgcgGgTAATggtACTAcAATTacTaCTTTtTGCCgGAtagCCttcaacacCTgcctcctTgcAgtggTGaTaGgTcAcgAATagcgtaGTCATcTGGACTCCATggTGcGCGTcCGAACcAGCcCCCCccctcagccgccctcggggtaggggccctcAttgtaTgtCTCAAAaAAGCAGcTTAgGGCTACgtcGAcCaTTAcGACATCGAGCGTGTAgTATGCGGGAGGGcAggcGGCCccagctggCGcTcagTcaaCgGCccCgTggcggggaCtctgccTgtgGAgccggAtgcGGGCCAACGcTggTTTTGGATGTgGGGCCATTGTGATGTCAGGCCACTGTGTTTTcGCCTTCTGTCGaTCCcCCCcCGTGATTCcAAGAGcagAcgtCATACAGAAgCtcgTgacgAcgtcGTcGGGGGAggaAcgAcCCGGTgAgTCcgCGAATTGTATAGTtGAcTATAgGcTccagccggccGTGAgaGgCgccgTGGcCTTgcCgCGGCTGACATaGTgcAgAAcATgTcGATCtggaAgggTCgTCGCgAAgatgCGCAcGAGagCgccatggaggtgcgggacttCAagtcctgGcgcgcggctaTTtTctgatccgccAgctggtcacgtTCctgccaggtcacTCcagGCTGAAgAtAtcctcTagcGggcgcccaTcccggtctTggagggcctcccgacgggCccgcgctcGgCccgcggtagggtccggTcccccccccttGTccCTccgataaggcaTgTtcccaaattcctggacccgtccgggcattatgcatagGcagGAcCacCTtcTcaaTgAggtgtgcggggcctctccAATCTGcGGAtAgTGggagacgatgcaaaggatctgCcccggtcggTcgtcgagcgGaacaaccgggggaatcgaaaagcgacggtcgcTgACAGgTTATGCGTCAGcCGgTCAAGACCgTGAGATGGTgAAACACGACCTTATAAGTATATGGCCCAtGGTGTTGGAgCCCTcTTAACAAcTAGATAcTAGCTTTtgACccGGgaGCCACGACgttcCgtgTGCGAgAGCGcGATAGACgTgTGGCATACaAAcCTATCgCtcAccACaaGCTCGCggggtcgccgtcgCTCGATCggCgTTATccgctccggaAgggagcgtagagaCtgaggctaaAacctaTgGaagaTtgccccAgCctagGgACGGAGTcTAtatTcctcgggtccggcgaAgTCCTgTAGGCAGCATGTCAgTATAAAGTACAGCGcCGTtGGGGgCCCcGGgCTCgGtCgcGtcCCTTGGGGTAcCTActGGcGTggCcggcGtGgtAaGTTTTGATTGCCGTTCCAAACAGGCGAcgTAAacactAaacaTGccaggAGcCTAggTcAgtccgggCcggcaatGggCttcCGagGACgCggTgATcCTAGAGCATgACACCGAgggGGCTATTGTCATCGAagAATAAAAGCTAATAATCTGGgCCAACACAAGAGTACTTacGgCTcTCAGTTAtcgGaAGGGTTCTAGAtGCTGCGcGcGAGGAAgGgcgCaGCtCTcGTGgCTtCtcctgtgaCcccgcccggtccgcGctcgAcGcctcgcgacccctctaGtgctaTctcCGCTCTAGTTgTGGAgccCgGcCATCGgcCTTAAcGAGcCGgtcTcggtctgCcgtGCTTCCCggGTgTggCCgcTtTTAtgTtggcCgAtcgaAccacGtATGggccTCCtcGAGCCGtcgaGTCTTGgAATGCGAATCAATATcTAGCcTAGGGCTGcggctccaCCTTCTAGtaCTCggGtggcTTgggTctcactGtcaGtTGcagagacccgGggGCACagAAGCGACTCCCGgGgGATGTTTAGTAcgGggcAAGTATGcATCGaAcgCctgagCtccgAACTATAACATTCGtGCTAGTCcgctgGgagactGATagcgccccatcaacgaggcctCaagAtCGAgttTtccTaTgtacGtggTgtttagttatCgCgctAgccccacaatagGagcctcataccgGggctgGGcAccccCTgtgcGccGctccgcgtTcaCcctGCcTACCGCCAGGTcATAGGgtCaccactgaTtAgCcaTCcaGggaacgaaaatggcctcgtaCggcaGTATtGCAgATTTAGGCGtAAAGCCTCTTccTCAGgcACACgcGGcTTTTCTgCATCAccCAGcCCTCaACGCACgccGCAAAAGAAGggCGTGtAAAGTGGTTTCGAgCCCAAGGAGATCCTATGCACgAtCgcaccgCCTGCcGCACgTgaCAcgcgagAcATactcgGCTgTCGAgAGcGCcTGTTGcgGcggggctgcGgcCTctcgCCcgcACCGgTTCgcgcCTGCTgcgGcgatctacgaATAtTTggTCCAaCcgaATGccaaaCcgtggggtagaagtgtcaatagaagcacaccgtccccccatcgcaggggggttcacgATcctctagCcagCatcaTaaCgGGtctgCgcCatggcTAACcCcTgcccgtggagtctcTTTCAgGAGCgtcATgaTcCAATgtAccGCtcTCAcCGttCcAcCGCCTgcGtAGcTTAGATgtGCGggTcCgggggGaAAAcATGAagTAcGTCGCaccGgTCGgTTCgagcCaGcAGCGaAGTgCggcgGGTGCATCCCCCCTTATTGATATCGAGCCtCCggaccggGggacGccgGTTAACAgTGAGGCACTGGTtcAGAGGcTgtacCtAGggGGTcctCAAgATgGcGgAGGTACccCAGGTGTAcAGcACTGACCgGcATCTCTGTTGAGTCcTCGCTcTGATTcTCcTCTccAATTcAGTTAggTGGTACCTgACcTcGtcTacTgAccGtgaTacTgcgtAAcatggcctgatCgGGttacGcgtgggTTgagAcCGcGgcACTgCAGgTtcACGTTTccccCGTCCGCCCGacGTTAgCCAGCGTATcACGgGTGgTTGCGGGTAGTTGGATCAGAAACATGACGGCcCACAGTgCagAccgGtTTcTACGAGacgAAATcGCCGGgCcTGgATCgGTCGAgTTCGGaccGCCaCAGctTTcGcTACcCTGCgTACcATCgcgGTcCTgCAGCCTagTACAAAcGCTCGATcATCGCGcTggCggGTgcgCAgGGctaGCACACGctATGcggctgagtcCaTgTCGaaCTgATCaGgTcCgggcACGAgcATTTCGCGcCGCagGCAGCATACgggGccCagcccgcgCttGAAGATgGCTGTCCccCtcTcTcTTcCAATCCAtGGGCCgAATGTCAGAGCgTACcccGATTAcgTCCcTgGAgGAAAcTcACGTCgAGAgaGggTgtCcAAgCgCGCCGcgTcTCgGCccATAgAtGAATAcgAGAAggccgGGCATCcgTgggtcccgtggtcccaActTccgggTgTatcgtGTCGTtcAcGGGcGGAATAGGTTAaAccAACAACTTTAaACCgGgcATCcTGTGAGgCATaaGGTAGAGACAAGATTACcCAGgCACcggAataGacGgGtTAGGGACCCGAGTAGATTAATTATAGCgtCccAcACggtcTgctaaGcgggccGtgGCAcggaAgggcggCATCAACTCGCCCGTAGAGTGTCGTcCGTGCgcTTTCcGgAAcATCGATGAcCGTCAATTCTTAcAATCAATCGAGGATAAGTTAAGCCGAAcTgCACTCATgGGCGTgCCCGCGTTACTGAgGAtCcTgacggtaATAAAGCTgCGAtGTTCCACGgGGAGAcTTagaGcaGAGTTcGCctaaCcggcgCCccAAgtCTacTtgcgtaCCCCTTCcTATGcAAaTGCTctggCTGTTGgCcagagctaGTcGgtagcGtTGTcgtgGGCGTccggggGACCGCaGTccATAACCGCGCgCCGCTAGGgttagcGcagcCCcgGgTcCaACAgCCTCGGTGAGCgTAccTTGGGGCCtCgCTAgGAgGCCATGTCAGGCTAtTaatgggTGTCgcTATCGAATggGcATtccgCTCAAcTACAaACgGGTCcGCGCtCGAAGGgAcTTCGTCTTATCTCCTTAgtagaATccacgGgTGGGTGAGATCAGAGCTACGCCGAGCGGGACggAGATAgAggGGGATGTGcGGCGaATGGAAcAGCGTGGTGGTCAGGTCCGCTAATGCCAATTCAGGATAGCCGaGaAACAATgGAAAGAATCcGATAcCGTCGACTGGGGCcgACccAAGGTaGtTcCCTgGCTACATCAAgATgctCAAGTgGGtaGGtgtCCGAggcaTtcaTAaCTCgGGTCgcAcGAGGGtcgaagAgcacCTTTccacgGcCcAcCAAatgcCgGTCAtCTGACGTGGTAAaATTgccTGcTCGgccCgGgGAgaCgCCcAcTGATcCCCtctGACACGTCaGGtggaGGTAGaCCGgTCATgCGGTGCtcTAGAGAccCTTAAACGAAGATtcGtCctCATTCAGcCccaATCTCGGCCgggAgccTGCaCatccTAGGCTAgCtgGTTACAAGCAGCGGCTTGCCAGGGTGGAAAcGgGGCCgcaaCTTTCCCGGGAA
>trimmed.Xvv206.SRR494500
TATCCagTCAACCCGTACCCaActagtgggGCGGgtgtaacaggcctgacacActCTAgGAGtCTGGTcTGTGcGgAcaAGGgAcGgGggAagtCtctgtgGgGgGAccTgcTCCTCAGCccTACTCacgTATAcgCgaGATATgCTcAgTcGgCgGAgACacagACGCCATTTCcaAcaCTTACaGTGgGGgACcTCCCTGTTGTACGAGCGGGAtATACGGTGatgtagtccGcccCgCccgtgctaCgAcgTgaccccccTTATTtTACggcgcagtgccTGGTAGgGcTgGCCGcTTCGGACgATATGAGTAGcgcGACcTGCATAGAGgGgCCTACCAAcACgtTGAGACAgctgaGATGAGAAtgAACTGTGggcAAGGctTaTTggAcGACggtcggTGCGGccTtcccTACAAcCctTAgcgctacaaggggagtacgccccgcCcgccgcCcTcggGGtTaccAcGagccaaatcggcgcAgagtgacattgggcaGcccgaggcaCccagagcttgtgaccggggcgAATTAaGcgGTAaGCCTCTAAAGGTATAACCTCGcTGGTGGAAGCATAAAGTGcTACTCgcGGAGATTATCGGcCTGTTTgCGTTTGTATTCCCGCAAGCCCGCgTACCgGGCTACCCcATTccGAACATATATgCTCAAGTCAcCATTTCcgGTTAACTGGGgaAacagtTgATGAGGAGTTgGTgTaccAgGCCCTGtcTCTCGaCgAcTATATcAtagcgcgcaGAGAATgcCcGCgAATCGCTTtGgTCcgCTGCGGcTgggGGTCGGAgGcgAtTagAtgtgcgtctggaccgctcggaCaTCccAgtTtctggGggTCGTTccgATCCgTTGTctATTTTACAATGgGTTCTACgTGcgGTAGGcACcTTACcgGcTaGGTAGCTAgATCTGTgTACCGGAgTGAGGATcTTCTATTACTcACTATCAcGGAAAAATGGCTTCCtgACcCcGCGcccGGCGagcacgGgcAcgAagTcggGcaaaaacaaTtaggccCTagacgcatccgaccggCactcttgGgagtgcccccTccCcgcTtggCcgccCcCgcCcTccAcgcCagTgccCccgCaggTttaTcTttggcggttcgcgcgcctcgaaaGgGAGgCAtTccgcgtcGctgtgcgtgaCaaGCCGcgtAgcttgCtcGtcgGtaGCGTgtCAATCCtggCaCATCGgTAcTCaCcCTTTgCCTCTGaATATGCCATTCCCCGACTTGGGGGGCTcTGGCCTTCTTAACGGGTTCTTTGTGCTTgATGTATTTCTGTTCCgCAAAGACATCTGTACacCcgacccGtgAtgtccggagGTTacGgttgGtTAttgAccGcTACCACACCCGTTAGCCGGTGTcCTTCGCCGGCTAAcCCTAGGAAccgCccacGTaacGCaGGGgAAgTGATCgcgTCACCACATAAAAACTCTGAGTGGGGGCAATATCTAACATCGgtgggAtCCAGgAgtAGgaCTGgAGCTCTATTcAgccCgCCctaAcGccTcTgtCcacccAAggTCgAcCAAcgaGAGtgtgcccAatccggaagTGGaTtccCtactcctgccgCtTggagCagttcGTAcACCGTAcAAcCccggggTGgTcATtcgCcaggTTGCGCAaccgTTCTAGcgGGTCCAgCATTAcTCTTAGTCCGCgAGCGTcTgATGCGtggGcagcTgCcaatcAcCCgGagagCcGTTGgAAaAAcacAcAgtTTgTGGGccCggccGtTgGGAcGGGGcAGGATgGTtcttGAggcCGGcGCgggtggtgtcggatgcgtggcgccgtgcAGggggttggtggCtaGCtcgGcTtacactCCcggaAtCgCAtCcCATcaCcgCaATcGgTgtggGgcCTcgccATtAgaTgctgGgGACTcACAcgcgACTTGAAccGTTTTTccCTGCtaGcgcaCTtaaGaaTCCAcCCTAGATAGGcaCGTCacCgACCcggCTcactcTgccAAcGTccTAaTAgAtgCCCgacccaacAaagatggaaCtatgtcgtgttTcacGcCCTAATCgAGaTACCTCACcgggcccgccAgagCatGACCTATCTGGaAAGCCGgGGTCGTTCGGcGTGTCAGCCGGTGCCGCCCATCAGCCTTTTGGACTAcACATAGGGGTGCAACTCAGTAGAGAACGAGGATCTATGGGCGGGCTTAATCTCTTGATCAGCCGgATCAATCGGGCAgTCTAGAggCGTaCTcccagacacaaCCTCcagGTCTTGActcgGtcgAcgcgCGcgACACTTAccAATATAACGCCCGTTAAGgGCtTCCTATTTTTTTCCTAATTGTCGTGGCCTTTTATGTTGACGCCCACGCCTTCATTGACTGCAAGTCCtggccGTtAcgggAgcaaTAtCccagaccaACTAAAAGAGCCGGctacagacataTccCTgtATATgcgtctcggTGTgAATcgGTACGCCcACAAggTTTCTCTAAGCAgAATTGGGCACCCATTTAcTAATAATCGGGCGCTATAGGGCGACAcgTGgCTgacGcCCATccacAGGCggTagtgGTgAGAGtCcTCcgcTGAggGCCGTGCCGAATTAGTTCCGGACCGTAgTgTGATCcACCggAAAtccAcGTAGCGGTGCAAATgagTCTCaggCgggAacAcccagggAtgTcgcggAccccGacAgaagtGgcaAggcgTgtgcggggttcacagagcTgttgggtggccgctGtggcgtacccccgccggtccaccatCtagACcgAtcgccAcccgctacAgggGcggTgcaTcTCgCgccCttcctcTcgcatTAaactatAttgcAGGATCGGctgCctgcgGCCgCAAatccccGGcATCCGGTgACCAAATGTGgATCTTCGAGACATATCgCTCTAGAAGATACAGCGTTCCGCAGGTCTcCCcAgGgTGcGgtGgcccGaAgTagccgcgcgcctaGAtGGAgggggggTTCCagaAggctCTCtcAGgcaAccggcTctaagtaggCATTgATGtTCTCTgGtGCcCTggttgtcttcATcaCAGggaTgaccggccgTctGcgcggTtgtttaTCgGAAtAgcgggcTcGTcaaCgTatTAAcgcagctggcgccggccggtgcgacGAGAtggctATAGactAATaCggAGaGTCCACGAtCAGAGGAGGCTGGCCACTGCGGCTTGgGATATACGGCACGGGTGGAACTGGTTATCTCACGAAGGCTCCATGAgTCCcATCTAAgCGgTCCACGATTTATGGgTGCAGAgCCACCCcgggctGgTGGTTcgCcAgAGATCtCcAGcTgccGGAgcACggcTcTgaccgAgCTGgTGGTTCTGAGCGCGTTCCGGACGTaGATCGTCGGTTTTAGTTGTTCCGTTGCTGCcCTGCGtGGTCcGTGgCCtCAtATcCGGCTCGAcAGaatctGgaccACgCtgGccCCTTTTAAGTCAaCGTCCCTACGTCTgATAGCcTACTTATTGTCGGGCTCTCGAGgCGCCCCTcTCATGTTTTCGAATCTATTGCGATTATCCAGACGGCGCCACTCTTACGACGTTTCACTTCGTCATCACgccTTATTATAggTCcCCGGTAggCcAcCCGtcgcGtcacgagccCCtgtcAAcacCACCAgTcGCTcACgATgTGgggcCgtTAGccCgCACCCCGCgCGAAGctACgaGAgTTATtcccgCCGTAGgTaAcaCcggGTgAgtGCcAtgCGAGAtaCGGGcTcCCGgcCtacgcGATCCACCATGgCtagAaTTGCTCGCGcgcgcgTActACGGCTCTGAGCCCGTTTAGGCATAAGGTaCcGgGATTACTGaGcCTcATTTGGCGcGTAaaCTAATcCgTATGGGATAAGTCCCGTCAGCGCGTgACtGCgaGagtgTaggcctggccgtgTtcgtcccgcccAcCccTGCCGTCATAgaacgTCAtgcTaaGggcTaActcccgGgggtggtcctCgccccCaTAtgaTCCggcgctccATcctgccggTtACggTCTTgAAggaccgcagaagccAcgtggcacgggGtttgctAACCTGGGTCCgGcGAAgGACgTTAccGGTACAgctTCAcAAggCACCCGccAgTTATGctAcCGccggGGtgtCacagtaaatttgttcgtttacattcgggaccggagtattgcctgagacggggCttgacaaggagacgttCccatacccaaCcAcccTacggcTAAACcCGcgCgacGAgAccactgtcCcGGcgcacccgccTCGggccgagggggCcgAAACTTccCgGaagcGgGctggAcTAaTcccgggcaccAggggggaacgcGcAAcCGGcGgacggcccAgctttcttccgccGaCtcgaTAgGttgaaggccgaatAagcctggtcAgaTccagatggtGaCggcCGgCgggAAAGCGccAAAGCAgcCTAGaccctgTcggcttaggaagtgAaGgcaGcgacTgcgccggcgcgtacgcctctacgcCGTtTGTCTCTGAGCTTACTGATGGCAATTTagTAtcGCgGcCCTTATGACTgTCGaGAAAcGATcCGGGATcATTaCAgtCCAAcAAcccCattgAAAAGatCaACcggccTACTTGGAcgtccGTCGcgTAaaCTGgCCgaatTTacctGTGCACaATcGacCCccCTgagGTaAAGTGCTTAggGTCgcgAaAgtcgaGtAgtcctaccccgcgaTacAggcTCTaacAgcagctaGtTCAaGAGtgcggGTgcatCCgGcggAtgccTAATTAGGGCTTcCCgGgTACacCTCACcAAcTtcCCAcAgCCgAAATcTgGTAcgtTGGGTGTTATActgaggagccggcggTcAcctagcgccCcgaggagggtGgcgggcccttgggaGtcggcAccTTccaccagcATcttagAACCATGcAcggcgcAgActgtccTtgcgcgttAcTcCTCActCTcAGCTTAGTGAGACCACCcAAAAATGCCCgTCAGcgtGAccgGgAGaGgtATggcacGAgcatCgTgCTccaatTCcgcAaTagctctgcgAgtagCactccaccctaCcAcagccaattCGCCcAgGGatGTCAgTtatcgtgTgctgcgggcccctggctgccggtCaCcgTcAgagggcGGccATccAACcAgAGTTCTGGTTGGTGGGGGCCTAttgGgATAAGAgcgcggaggccGgccggggCTtctgAcccgcggtTTGGGCAGCggTcCGTGAcgaCGTGCgggtcccgCtCGTAGGcCCcCCGACTGCCctGTCaCaATACggtAgcccTCAgTCatgggCcaactcggggACGGccCTTggcCGcCgCTAGCGgccgcgcTTAcAGCACCGTACGgAGTcATGAgTcTGctaCcgTCGctagggcctgaaGccggCTgccgcAgcgaccccCagcaAaaccccTcagagcatcaacggccCcggttaACgctggggacgcgattcacTTGTgCgGGAacTgCcAcAcGgTtGACGgatccCGGAGGTGTGGAcctcgtgAcccggccccATtcTTAACTCTACcCTgataccCcCTCgaGGAGATGCatcCCAGcgTCTGgTGCAGgAcGcACTGTgaccgcggAAAtCGTTTTCCTATTATTGTGTGCCTCACCGTACaGTCtTACCaTAGTGCcgtgCgCcgATACgTAgCcGgcgagagcgCAGgagccCCgGCCCGAgGcGATATTgAAAAgGAAgGCgGAAATCGGGGAgGGCTGGGGCTCCGCCcGAGACAGGCAAGCGGTTAGAGCATGTGGAAATTTATGGAATGTTATtGAGCGtAGCACTCATCTAcgctCggccaTtataacgcGtgTggcGacgGgaccccttGcTTtggAaaGacttgggggAAAgGAgTtgCAAAcGAttccAGaccCCAAAACcTCCGcTCCCGAggGTgTACATcctgcTtTTctgCTACgAGcgTCcTCtACGCcATcAgcgacgcCCACAACATTTGAGCGGGCATAGCAGcTGGGATAaGATGCGtgaGtTGCGcgCCcCATCtggTaCCcgaGTcCaGAcGtgGagGcGccGCTCTATtcagGGGACtCTAAgtTgcAATGgcTcCcCGgCGcctgTATcTttctggGtgcccccGCTTgAgcTcgACcTTCcTTTActcTCTACGGCTGGGAtggCAATTGGGGCTCcGAAaCTAAGTTggAgCGACTGAgCCACccTAGCTACACAcTtcGgGtTtggAAcGGCAtTAtagATGgGGAGcGCgGtCaCTGTTAGGGcAAGTTTTTGTgGGTACaTTcGGATCTTTACCTGTTACTACTCCAACAccAAAATGCTCgCgCTGGTCcggctTAgTTCTGcCCGCcAtGGAAAaAgAATaggtaaTcCCCcTcAAGCAcgGccTAGCCCCTCTCAGCTggggcttGgGTCTAgcCCaTTcTcagcgCgGAcCCGccAatcTgAcCcTAtcgTACGgtTTATTGTGcgcgTgccccgAccTcCAcTCgctccggggGaatttTgggCaggggcgagcccCtcttagtgTgccccaggACgtgggcgcCCaaCACGAcTCCCcCCCcCCCACGTTCTgcAgTTccCgCCgCTCTGAGTAAAAATCGGCAtccgtTTCTgcTAAAATagAcggAcTGgGCTTCgGtcCGATGAGCcGTAcAGtCCcGGTGCTGAAGGTGTtGgATACTCGCAGgctGcGCCGgAGTTGCCcAGTgtgCCGCTCcAAgcTCTagtcgGtcATGCcccTggcTTaGACgaaaccCaatgtcgggCCcTTtgtccaacCgacacggcTAGTccctcaggcaccgGgCTaCGcTAcCTcGaGaTgAcATTAcTTgCacGCTaggtaatcagcggaggcGgccCCcTATCtTTCTgAGCcCCggAtcgtcgcaGTGcgctcctgaccAATcgtAgggcaaTGTAgTGgGACTcTTCCCGTAgatggccgcTctcGAcACaAGtTCAggCtcgCcCTGGGGCGCCccaggGGgcCGtgcggaaggGGCCCCGATACGAGTTGGACGGTcTGTgTATgACCCTATGGCGCTTCCGTccagacATAgTCACCTTGGgtcgagacttcaccaatggtcatcgCctgTactcgGaAattgagCaGgAgccgaacagcGgaGcCGTGAaCgtCCGCTCctGgtgGTAACTAAcATCATaAGAATcaCcCAATAAttcTgaatgCcccgctgggccccCcCcGCATGTgAgcgcaTgaATGaGTCGTCAGTTCTGTGCTCGGggGTcGcagGcCTTGcgtgtcccgcgctaacTGTTCTTTTTcgaCgTTCTATAGCCGcagcTCCcgCtCAACcCGAAGaTtcTCTGggGagTcccgTTCtcTaaTAGtGtcgcctgggCgcggTaCtCtgACaccCtcggCcacgTCAAATGACCAAATTATTcCAaCATACGCCGCTCgggAGAATGCACATgTACGAGCTAAGCTCCggccggGGatggcgctcggtccgccATcaAtgGTGCACTTTACTGTGAGTGGAGACGGTACAAATCGgATcGAAAATgACCTTgTGTTCCATCGAAATTTGATGAGAAcGATCATTTTCTCGTTTCTAGTCGCCTCCgCCTCTGACCCCATACCCTTTCTCCGCTGCTAGGAAGGGGCTTcACTGgATCtTGGGCtCcgTCGTTGATcTCTAGGAGTtAGcAagGaTCTCACCTCTTAGAGAGAAGAAGgTGTCTAGCTCTcgggccaacCcaTAAACGAcCAAttgcTCCACgtgATTTAAGTCGCtGGgTATGTATGCaTATGCgATAAtcAgACGGgcTGCTgcagcCcgggcgcccaaagcGTCGATggcTAccccagCgaactgTcctTCTGcccAgaagcgTTcagtgcgGAGGccggCggcggggagcaCgctcTTTgAgTccCgcGgcgCCGATCGTCTgGACCGGTGGGCAGATCGGGTAGGCATCGAGTGCAATTCCAACATAGAAcGATGAATCTATcCTATCGAAgTGCGCAGCCGGTATTTCTTTATAATCTAAGGCTCGAGACTAcGcTGTTTTGATGTGGGCGTTAAACGTGCCAAAAAGAAAGCCCGActcagggaccccCgcacgtcggccGgTGTgcgGcgTGGGATGgTTTAAgAACGTCgTTCTCTACAGGAACTGGACCCtTACGGtgGCCCAcctTtAGCAaGAGCGGTATCccgCgTTATcACAACTGGGcGgcCTGcctTTCGAATGAtGgaACACCCAcagcTAGggctGTGgTGGGcgcAcgccgggTcTagcTAttTgtATATCTGATgCgAcACGTCGGgtcgcCGggcacCgagggaGgtAcAgcgacccgtgccgCttccCtGTCCAaCcACgCgTCGATagTAtCTTGTAGGTCGCGGggaAGAgGGCcgaGAAgTGGCgCATCcGgccCGGTCccCcCgCcccatgtaggggtacacgggaccgcgcgcGgCaagtatagttttgtacgccAgccttgtCAagcaacacaaggcgagaaaggaGacgAcacccgacTccgCggcgtACgtcAACTGAGCAGcCCccATAcGTTCCTgttctgattActcgGCATACACGTgGcAACCTGCCTCCGGTcATAGgATTCCGGTCCCCGTTCATGTTGGTTCTTtGCTGGGAGCTTCTGagGcAcTAACcGCagGGAGCGTgCGCGcTGTCCGCCTGTCTGGGGTGGAAAGTGAGCGATATATATATAAatccaaggaTccAGGgaggtgCGCAcCGGAcgAaaAcTgACacaccaAcgcagTTTTAGAGACcGCCcGAagaCGCTGTGGGGCcgcCtACGgAccATgGtcaCCTTGTACgTCACGGcCGGtcggCGCtCacggtaaAacTTcTagtcaGAgAgtgcCgCAGGTcGGTgaaggggAAAgcACCCGcgcGGAGggggatgcCaGcggtgacTGgcgagagagtggGtcAcTTggaTttcCcggtAgaagttACAccttccAcccacACTcacacCATGCCggaACCcGcGAGCGAgtTAtggTgCTcTcCcAcccacgTgAcgtTgacgtacgGCAGgAAGTAGcttTaccACCcATCAcgAACtacTTGcgCTCtgcCcCAaGgGAACtTgAGAtGAagcTaCcAgCTtTAAgGggcgCAcGAGGCtTgGggAcCttTCCCgaaaACAATgcgCgttAAGTcCggcgtTacgcgcAgCgCGcgCGgcCGACgTttCtGcTaTCGTgggGTggAgCCACgctgggcAAaTgTcGtcAgtCgGGgTCGTACggtGgacaGCGcGcCggATcagcgctctGgGgGGCaggcGTtaCCGAagagCgGACGGCcATGCCaCcgtGGCGgTcTCGataTCAcCGctcGGccTCATAAGAcTATCAAAGAAGCCCgaTATccGGCTTGAAcgGcgCGTCcCTgATACcaGgCGTCGCCATCcgaGTaCcgcgctgtgctTAacGAggtcAcAcgActccGgTgcaggGgCCcaaGGtCagacaGGTtGcgcccgacaacctttagATGATTTTcCGGTAATCCAagAACCgGAGCgACcCcTTAcGgcCGtacCCCAacTCCAGTcCGTTtCACcgTtcAgCggGCCTGCAgGAGCTCATTCcgTGAccggGCAccccATCCTGTGTACTTTAAAgTCTACGATCTGTAGGTTCCGCATcCACGTCAACGCCCGTGTTGTcATACTCTTTcAGCATAATGATGTTCCAGTAAAGTCGgcTTCCGcGTTATGcTgTgAgGAATGTTGTTCCGCCTCATTATTTCgaACACATTCTcTcGCCGcCTCgCaccTGacTCgTcGAGGTGtcgAAGGTTCCTTgATATTTTtCcGCtgTCggTAACCAATTTTcGTcCTTTTGTTCAAAAgtTgTGgACTGGgGTGGCCACGTTTGACGAGTTAAATCCtTTAGTGTCcacGTAgTAcTGcCCAcTACTGcTCcCCgCcGACcTTTACGtCCgctaGGGATcgAGTCGGCTGaacGCCcCgCtGgGggATGCTGCGttGAtatTacccaTGAATGgGcctccgtCgccaTgggGcgcgCggaCctcgtCgggatcggtCcgGCTcgACTGcGcttctCaaacgcaccgtagccggccCgTgTCTGACGATGCTggAgcggtcgccagCTgcttgtccccgggggcggCcggcgggTGggtatggtaaaTGTAGtcAtccTCGGGgggGaTagGCAcgcGGtggAgcGtGGTCgcccaggAgCatgggcgccCgtCCGGTTCTGCCGCGCTGAGccgaGtAGAgCCTACGCGCGATGGGAAGCGGGGTGCGACTAcAATAGGGTCcCccccATATATTACGTAaCTCTATcTCTGCTAActCACACaTgGAgaCgGCCACGTcACAGTTGAATcAcAgcAccatcaCGGATGgCATCTCGCcTCTAGATTACTTCACGCATGGTTACTTAAAGTTCtgcCgCCAACAGTCCCGccTCCGTgCGCGTAAGGACTGCCTCTCCTCGATCCCGACTGTGAGCCTCgcGgAACCcAGCccggaTcgcATCCTGGAcGCAgccAcTTtCcCACtgATcGTGgTTTTTTcgcgCAACCCcCcCgAcCCTcGcaGgTCGGcTTCATTgcAGAGGcggcGCcgCcATTATCCCTTACTCTTCCGCGTAAaGACGAcGAaAATATAGCgGGtAGTAGCACACGCTCATAGgggacATcGATGTccgactGTaaacTccCgGGgCCAcTgccccaccaccTACCGTTGGGGcCCTCTAGAcTccCacggctaaacCTCTCcAgtacaggaGTgACCgtcctcaggagGtgcGtgcgGaGTCATCCAcGGCgTCgGCTccCCTTTACCTGGggccccCTGCCCAATCCCgCcAGTTTAAGGAGTACTGGGGCTGTTAATGTCATGCACTAGATACATAGGGCAATGACCaAGACCCTGTGCGCATCAATAGCAACTCCATACGGAAAAtcgGaCTgATcTcCAAGgGCCTgcctgcaaTTTTTTGctCacAGCGGATTTggCcAcgcTgcAGAccgagtctaattcgGgcgCcgggCCggcgttacggGTgggcgtcAccatGccCtcctgcAgGTggGaaCAGAGTgGTAgCtgcTgCCTtGCAcgAaAAAAaggGGggcGAGGAAATGGTCGACCGGTCACCTATACTGTtACCGCCTgGGGATCTTGTTTGCTGAACTTGGTCCgaCGccCGAAGCATCTcGAcACGGgTATgAgGAAAgGGTATCcTTTCCTGTACTcAccGCcgCACTgCgGcATgCTGTGAAGTcAAGGGCGGACAaATGAAACGCCCGGAGGGcaGGCgCAcACtGCcgCCTAcCCaCTgggttCGCcgcTcGGGcGcGgctgcccTTggCTGgCGCTTTCGgccTTCAcGcaAGcTgcAGgtCgacATcAGACCCgGATCGCCGgctcacggcgATTTGAGcAGTAagCTGCCCcggggtCCtAgAcgaTGGCCAGCGGCTCCGcCCCAACTAgTTTaCtaccagaactctGagcgTaacgcacGcctcaacgccagggtgagggGaGCCCTTGTGAACGTCcgccTgcAcGAATCATTTgccATACTCTCacgAacagTgggCgagcCGGGTGCCCCCGCACGACCCGAATTTCggTAcCGTgTGTtTcGAGgAgaGCcGGTTCgcAgAgATaTTTAcCAGTgCTCCcCAATCCCAaaacaGTcaggcctTcCGCCTCGATTcTGcggccccAcTGgtTaGagtcctTCgAgggggtaAAgcAcCGaattCCCCCGgtcTTgTCAGCggtGgaAGCCTCccacTctGaGgagActTtcgcTcgAcCGGTAGGAAGTCCGAGTaggATCAGGCCGCTCcGCTACAAaCCAATGGGAAACGTCTGATGCtAgGAACActTcgggcggggGttgagcggTGgGCgGAGAGGgAccgGCCAGCggAAcgccTcAATcGAGGagggcgcTGagggAGcAGCgcgcgtTGTcTccgaCGGAGCGCTGAAAGCACgACAGATAACGCTGTTAAGCTACCAtgAtGcAttgTActtgATccaAccggcaATggcAggcCgTgGcGGCGGAACGGggCcacCGAagacgtaccctgcgatcAcctcctccggtttcGcccGCcccGtTaTgcgatctAcgtcctgtctgcgccggcgcggAgagggAtgCctcaccATaAacGcCtggttccccTAcCAtctcatggctatcgcaacgtcaaagtggcacCgctaatgGAtagggCccgaggccccggcgCgacCagcgggctggCGgtcgCtcgTtTCaAAcCtGTTgCgCAccCggGccAGTatGCACAgAAGTACCTCAtTTTCgCGgGttcGggTTggGcgcCAaTgaAgTTCtcacTgGGgTGAAcTcgACTTAAaTGCCCCAGGAGGGAcTGTGAAAGAGTCTTATGcGCCGAAgGACAGAAATCAACCCcAGGGCAGgGgCCTCGAATGGAGAAgAGTGGcTAaGAAgCcgCAGgCttgcggtaaTctaaaAAcAcgcCacTtggacggggCggGAcgATgcACTAgTcAcGCGAgCTTgggGTAcgAagGgAgagaGCgcgGccgtagTTgttAtATTTTgaTGGATGCcGccAGCcTAaacCTATTAggagagccAgAttggGcTTACtccccTtagcggccGTCcTcgaggccgcccCCtTGACggcggTGTATGGTgaACGcATTTCcgGTcGgAgGCCTCTACCTcgccgggcccctgccgGggtTAAGTACCCCtctCTgaagtgtGcGCCGGCgCtTgGgaAcggggcgcGGATcACAgAGCccAtcGctcgcACCaAcGggcTCaAcccGgtCGGcgggtgggggtgCgttatctgcgcggtgCcCAGTcCGccaggcgcCcAAcgCCGaTgaacATgCAgaccagcgcCgaatTgtcgtttccAagcccgcacAcccaAggagtgaccggTactgcggATCCccgctggcgctTGttcggTcgatgcTATCTggTCTCCGgctTcctAGCGCTCGGGaAtgaGACatggcccCccccggggggaggcAcggtgggtctccAaAgcGTTCCCATGgccggataggggaGggaagacTcccGgaAaCtaactcGTTATGTATGGCTAAAAAAACTATATAGCGTgGACATGGgCTGcTTAGGTGAAGCCAATGTgACGGTCGGaggttccgtggggaggggtcgggggGGgagCccAGCgTCGAAAGcgGTGAcCtAagACCAAGTTCCgCgaggttgGTCTCCTgTTcAGtcTGgAaGAAAGCAcAATTCTTGTCgTAATaTCTGCAAAGgCATAACCAtAGATATaCATCGGGCCAcTTCggAGCTccGACcGgtCcgcTttgagttatcGgtcccctttcgcAGCTtTGGAcgCGgAAGaaCCTAtctacggcccttcTcCTgTGGTCgTCcggccGGtAACTCtCCGgAGCTGtGGCGACTTTTAAAAcAATGAAgGCGCGAGGGAATCgaCAccAacGtGcccTgaCGCgcCTatTATGtcTCACcAGATCCCTaggCAAGGGtTAAGCgTcccTatGTCGCTggGcTaACAgcCCTCCGAAgGTCCAAGCTcaGCTgAacGgTCCgAccggggggtaAccTTCGGATTcTGGTGTTTAactttcgggGggtgAGACCAAgTgtgagGAgggaGGGAAGTcGCAgCagcCgCGcTTgggTccgTCCtAAGgGCGGgTcgcCAgccGaAGctCattGACTGgTACACCacgcaGcccctggCtatctaCCcGcCgtgCTaccTACgTGgacGccTGGCcCGCGTTTTTCCGCtTACTAaAgacgttCGTAACGCAAATTAACCCGTAAGggAGCGgAcCATCGGTGGGATGATGCCGTTACCGAgATATTAGAATTTCGTTAGTTAATAGTTCTTTAGTCGTGCTGAGATggcaggATCcCggaCTTTTCTTCTAGcAcacCATATTGGcaAAATtAGAagAatccgccTCgGgAAGaAATCCACCACCATGATAcGAgcgtTcGcctacaGAGGGACGAACTGCGCACCGTCCTATTTGGCAACTGATATCATcAACAGCgAAgGTCTCACCTGCTATGGATTGGCGTCcCGGgCGATAGCCGTTTCAGGCCgGCATTCACGcCCGTActCACTTTGACACCAACATAATCcGTTCcCTGAAAcccgCCGCCCATctcGcTgaGACgCccTgaGgTTCGCTCCTATGCCCgGCTCCAGgcTCTACCcctcgaCTTCTACCGGCctcGCgGcgcCAtgaggatcgGgATggcgcgtCtCagaGaGGcGcAtcgCgAGTaTCACCCGGTcTccgcagGgctatgTCCCcCTACgTGcGCGcAgGATACCATCCACTCGgcCggGggggcgcTGCGCAAGctgGcTTGTGACGATAGCAAagtcaTggGacagGcaAcAGcCcGCCTCgaGTCGTGCGCCATCGaAGGAGTTCACaACTAATCTcATTATGGGGTTATGTGGTTGATCCGGATTcCTAGTTGTTaCCGCCTACTCATGAGTTAAGTgACCCcTGAATgGtgAtacaACgtcaTtTTGctCCcATCGcGAACGGCCCACagcGTTCCCTCAAgGGggACTCCAAAgAGCCATTTGgcCgGGTAACTgCGCAGCCtgaGcCGCCccgcAgaAgtctcgCTGaActctCTAcAtCTgCctacCTCTTCCTGTGCCGTGccCtggGccttcgagagtccCAGTgAGgGcAGATATggcTACGTAAAGGTACGcTTCTTCgGgtCgGTTGTGAGaCaAAgTgacgggctggcCcGcGTGATGGCTACCGgtcTtggcctAtCATcGGGAATCCCGCAGAGACCTCTCgAGAATGACTAAttAatcgcgtggctgcgcgtacgaTCcCctCAAaTgTCccCGGAAcCGGGCGCTacGAGAATGCGACCATCCTACCACCGGcGACGTTTCTCTCTTTCCTCGGAACACTTTCACCGCCTATCGGCCTCATTTCCGCATCCATGATCCCTGGGTTAcCaTGAAAGATCACcggccgggggtgggacagggCATAGTTACTTGTACGTTTGCCCCATTCAGACCCAAGACTTTcGGCGTTTGCtAAgGGatAAGGAAGGAGGGAgCCCACTtGtGGGGGGCaggAcAgatcgctGACTGcAgAagaATTCcgcggTggAgcAtaggggcggggtccTaGtgggATgatgagCgGTcagcTcccTCTGcTcgcgcCtCggaggcTACACTtcatagCTGgCcTaccGCgGActcCTgtgTGTGTTGCTCGCGgctCtgTGCATcCCgGaTGAcTATGACACTCTCTCCGgGaAACgCGTTgAtcAACGCAACTAGTctAGcGgCgaacTcctccctGgtgcTATCTGCCGgGcaCCGTGGTGGGTTATGaCCAgagagcgtgtaccGAAGcGcCaCgagtgaATacctAAGATCCGGACTCACTCACTAAAtTAGTCcCTggacggcggcattgtggcCgaccCAatgTCATTAcACAACAAATTGATCCAcaAGAGTAGATTAAGGTCTTAGccgcaccaTCGAGgCCcAACTCaGATTGGcaGtTTGCTTGAGgCcCATaCgacgcAGgACTCGCAcACtGcccggCgggggagcgcaacgACccaagggcTAcgggctCctTgAccggcTgcgcggcgggTcacCcCgAATgAcggctgagaccgCttcgtggctggccaggctgcTgcCTTTGCagggcgtcagggggcatccAcgggcgggGCaggccAAACTAGTtAGCGCCgggtCcccCatgctgCtgaactatggccgttTctTtgtcccagggcccaggatggAgAgaAgtacatgCgcaTcGTgTCTgAcTgGATCAACTagAcgagagCAgcAtaAggaaGGggcggggaggaAgtCttcgGTAgTCgAATcggtgctTgccacAgggggAtAaGcGccTCGgGaCgCAccCGGccgACAcCAGGTTCGCTAATATTCCtCAGCTAaGacATcGGagaACGGcctAGcCGCGCGCtGACAAATGGCTTACTCGATGGGTCAAGgATGACACGgctGAaAtcGaAcTGcgCCcgTgtctcgGGTtTTcACTgCggCcTGGAAcGAATCccGcTCAGaCTGCGCTTGggTtccGttgtagGcggcgcCCGCtgCGcgTTcggagttggcgAaggaTgAgTaaCGCCcTtggccccctaGGCCCTactgCCGGACCcTTAGtGcTcGcCGTACTATCCacgGcgcCCTCTAGCCGCAGGATtgtAgagTcagTTaCGcggAGTGGGgATTcGGtGTCTAaacccAgaacggGCTGCgGttgtgcgagatcgggccagccgccattcagccctatacaataaGacGcccgaCggggggggggccgctaagaataAgcgAcGGTCTACGGcttAgccgGTTATTTgATTaCtgtgcGtaTgtgCCTcccgaccTTtcAcTAtGAGCagtgaggcagccgAacgaCgtagacctcgagcgcgtgggcagggcgaCaatcAgcataccatgggggCaacgaccagcagctgtCATGGgTACAACggacatcaacgtaTccggaatgccggggaggccgTgacgATcagacACGCCAAAGCTTcgtgaTGGCTGTGGCGGCGAACAGgCTtTcagacTTgTCTCtCGACaGaccTGcccCGGAaCcTTCGaTgcGgCCtGTGCAGtgGAcTAAGtcCccCcaacGCTGcgtgCgCGcaGgTGAgATTCGgGTgaGcCtgtatcCtggAgccCGCTTACATtGGATTcGAATGCCGAcCcCTCCCCGgTGCTAAGATTGTGacACcgTTCTACCGCCcATGCCTAGTTTTCTCCACCGACTGCTGGAAAAACGCCATATCTTAcCACCGAGGGTTGGTTTGACCCCTATCACCTGTGCGTGGTCACGGTCCCCGAATAATAATCtggtGtACGGGCgCAgGcagActcctTcaTCAcATTTATATAGCGGCAGCccTGcGGgaaTttgcGATtaAGGGCACCTcTCATGAATAcaGCAgTGAATCTcCgGATacacGGAAAGGCTCTGGGggGAGTTAATATGAGcAGATcCCcccTCccGAccAgaCAaGACTGGGCcccgagcggggcggcccagcgACgcacgccAgagcgcCAGCGGCGtaGgTGAccaGTCATGCTGcatACcgctcTTACTccAACtgTCTTCACCATGTTgGCAcgcCaccgAccgCAGccgAgcATaTGAGCGGGGTATCCGGCcgATTGGAtgTAAAgGTGTTTgACcgAaaGAGTgCaACgCGTGcAACTcATAGcgtGTAAAGGTTGGTGGGAACTCCGTCCCCAGCTtccggaggcgCagcgGttcaTACAGGCtAAACGAcgTCATtCTCccCCCTTcaTCGGCTgGACTGgCTGCcTggAGCgccTTcGGAgcCgTaGATTGTCGGgttgaaacaccGCcACTaTCGTacgtcggTggccAacaaATccAcCaCGTCTCTaATTAGTTCAGAATCCTCatgGaTaTCCaTctATTGATTtTCAgGcCTTCaCGCCAcaAccaaccCCgCacaccCTggcccgtCGtaTgAgTAcgAAccgGCTggACCTTTcTcTGgCGAGAtgccagcttcaggCCTTGTCGGAGGCCGGATGTTTCAGCTCTACGCGCACGGAGACATGTCTTGCCcGTCtAGGCGGTTTCAGACCATgAgtgGCACTGGGTATAGGTATTacTttccACgcTTccCTAAGGTgcgggccACAgAACTaGGactAAGcGACAGgCAATCGAGgccTtacTcAccgcgtgcgcacTggggccgGtcGGTgGtATCTATCCAAACCaGcCagtAAgtgaCgaTCGctcgccCTCcagggggTcacTCTGGTGaGcCgccggcTcgccgcTCaCGGcGgCAATTgGTTTTATTGcCCGAGcTGgCCaTCGTACTGCCGTACtTCTAACCgCTCAATAccTGcATcGtCtgcgcgtGgcgatcttaacaccgAcCGGgCTGCATTGGCaTACTCaGgAGaggcctCaAtgggtcTgTgggcttTaTCaCGgGTAttcttcgctgcaggTTAtcgCGAgggaGTTcCcggTGcgtcccgCCgGtccTCgctgtctgacgaGAaggcaatggcCaacgacTAGGTCTTGctgTcacccTGaATCtggtCcACcTTTatATTCGAATGGCAGGAATCCActcCTcGACTtcgcCTgcTTgAGGgcGTGTTGTcCTGTAgTtTGccaCCTAAgTAGACTCTctgAgcGgggggccCAGaaaTGCACTgGCaCTATTgtGaTgTGGgccgggtTagTTaCacGgcGtaTGGgTAGCTTCCTGGGGggtgagggGTgggggAgcTAcGcaccaaGgcggcgGgTAAcTCCACTAcgAcgacTTCTTTtTGCCgGAtagCCttcaacacCggcctcctTgcAACAATaagacgccAcTAgTaCTTAGGTCATTTGGACTCCATggTGcGCGTcCGAACTAGCACCCCTcctcagccgccctcggggtaggggccctcAttgtaTgtCTCAAAGAAaCAGcTTggGGCTACgtcGATCaTTAcGACATCGAGCGTGTAgTATGCGGGgGGGTAggcGGCCccagctggCGcTcagccaaCgaCccCgTggcggggaCtctgccTgtgGAgccggAtgcGGGCCcgCGcTTCTTTTGGAcGTgGGGCCATTGTGATGTCcaGCCACTGgGTTTTTcCCTTCTGTCGaTCCACCCctGTGATTCTgAGAGTGAAcgCCATACAGAAgCtcgTgacgAcgtcGTTGGGGGAggagcggTCCGGcggATCTCCGAATTGcATAGTCGcccATACGTTccagccggccaTGAgTGACgccgTGaTtTcgcggtcctccgaggGacCTAgccGgcggcGATatggaggggTCgTCaCgAAgaCgCGCATGAGagtgcGatggaggtgcgggacttCAagtcctgGcgcgcgTcCaTTtTctgatccgccAgctggtcacgtTgctgccagAtcacTCcagGCTGgAggtAtcctccagcagCcgGccaccccggtctTggagggcctTccgacggggccgcgctTGgCccgcggtagggGccggTcccccccccttGTccCTccgataaggcaTgTtcccaaattcctggacccgtccgggcattatgcatagGcagGAcCacCTtcTcaaTgAggtgtgcggggTctctccAATCTGcGGAtAgTGggagacgatgcaaaggatctgCTccggtcggTcgtcgagcgGaacaaccgggggaatcgaaaagcgacggtcgcggACAGTTTATGCGTCAGTCGATCAAGACCATGAGATGGcAAAACACGACCTTAgAAGTATATGGCCCACGGTGTTGGAAgCCTTTTAACAAcTAGATATTAGacTTCAACcAcagaGCCACGACgttcggCAcGCGAAgaCGTGATAcACgTATGGCATACaAAcCTAgtgCtcAccACaaGCTCGCggggtcgccgtcgCTCGATCgACCcTAcccgctccggaAgggagcAtagagaCtgaggctaagacTtCTgGaagagtgcTccAgCctagGgACGGAGTTTAtatTcctcgggtccggcgTAgcatgAcgtctgctgcacaggcggggcacgtgaCccgacCaGcagCCtTGGACTCTGtCATcCGCCTTGGGGTAcCTActGGcGTgCCGggcGCGgCgGaccccacccGgtccgttAAgacaaCtgTAcggGTGTCgCGGGgtccagggaTtcgAAcAAgtccgggtcggcaattggtttcCGaCGAggCAAcAAccCTAGAGCccTgCcgacAgggGGCTgTgGTCATCGgGgAATAAAAGCTAATAATCTGGgCCAACACAAGAGTACTTGGagtcTctcGccACAAaGgGGGTTCTAGgCGCgGgcTGTcgGGAtgGgcACCaatagcGcagCcCCtTACTGCGCTTTTccTTACAcATGctcAccGccCcgGAGcccctGtacGATtGcTGcCGCctTgGTcgTGGAgccgAGctcTtGgTCTTAgTGcacCaAGTcGAgCAGgtcCCGgTTCCCggtcTgCACCgcTtTTACgcCAAcCgAtcgaAccacGtATGgCcTgCCCTGAGCCcCTgaGTCTTGgAATGCGAATCAATATcTAGCcTAGGGCTGTCTTtccatCccactaACCcCggatggcTTgggTctcactGCcaGtTGcagGACccTAGAgGCACCgAAGCGACTCCCGgGgGgcGcTTAGccAAGAATAAGTATacgcCGGAcTCTCACgCtccgAACTATAACATTCGtGCTAGTCTActgGgagactGATagcgccccatcaacgaggcctCaaActCGcgtGTCccTaTgtacGGggTgtttagttGttgCgcCAgcccAaAaGtGAGagcctcataccgGggctgaacgcccctgAtgcGcTGctccgcgtTcaCcctGCcggCCGttctacGgTcGcTtCaccactgaTtcgCcGTaAaGAgaacgaaaatggcctcgtaCgTcaGTATCGCAgATTTAGGCGCAAAGCCTCTTccTCAGgcACACgcGGcTTTTCTgCATCAccCAaTCCTaTACGCACAcTGCAAAAGAAGgTCGgGCAAAGTGGTTcCGgCCCtggccgagTgacAcatgtAAtCCGGTATCCTGCTGCACATAGCcGATAGCAcgTGTCAAGCgTTCGATAGcGCcTGTTGcgGcggggctgcGgcagctcgCCcgcggCagccCAcgctcctcgAgGcgatctacgaATAtTTgggttgaCcgaAacccaaaaGgtggggtagaagtgtcaatagaagcacaccgtccGcccatcgcaggggggttcacgggcctctaACGagCatcaTaaCgGGtctgCgcCatggcTAACcCcggcccgtggagtctcTTTCAgGAGagtcgTAaTcCAATCCcccGCCATCATCctGtTAcCaatcTTaCgaATTgaccgtttagCgTgTggTAaGcAATATGcGgTAcGcCGCGTTGAcCGATgCACTTCTaGAaCcGgGTTaCATAGGTGCATCCCCCCTTATTGATATCGAGCCtCaggaccggGggacGccgGTTAACAgTGAGGCACTGGTtcAGgGGcTgtacCtAGggGGTcctCAAgATgGcGgAGGTACccCAGGTGTATAGTcCgtgCgAGcgcCTCTtcctgGcgTctatcTcagccccgccgTcccggcGcGTTgggccacgttagctTcTatcgaGcggccGtgaTacTgcgtcccatggcctgattgGGCtacGcgtCggTTgagAcCGcGgcgacTtgagctTgtacccTTGctGgtCGCCatacGccgACCgttGcgTcAaGTGTGATcataGtcgcgctatcgcagggtgcaggcagctgagacgtGAgccgctTTTTACGAGacgAAATcGCCacgCcgGggTCgGctGgggctacaccGgtatgcctggccccAgcCcGCATACcATCgcgGTcCTgCAGCCTagTACAAAcGCTCGATcATCGgGccgCCgAGTgcgCggaGTGGGtgCAtGctAcGTggctgagtcCaTgcaGCGCTTgTtaGATGCggTTACGAATcaccgGCGTtctGAGCAGCATACgggtccCGATTTCTACCCGggtgTAGCTGTCCccCtcTTTGTccCAgTCCttGGGCCAAgTGcgcccGCTcAtTTTGAcTgTAcCtTTAGAAGcggcTcACGTaTAGAgGGggTgACcAAgCCCGCCGGgTcgCgGCTcgTggAtGAATAcggGAAAAccTGGCATCcgcgggtcccgtggtcccaActcccgggTggatcgtGTCGTCctTGcGcGGAATAGGTTAGAccAACAACTTTATACCAGAcATCcTGcactggccCGGGctaAcgtgctgccgtctgcAtACcgAgatGGacGgGtTAGGGACCCaAGTAGATTAATTATAGCgCCccgcgaggtccgctaaacgggccGtAatAcAAGAACAGCAttcggAgcgcCggcTAGAGTGTCGTTCGTGCgTTTTCGGAAAGATCGATGgTCGTCAATcCTTAcAAcCAATCGAGGATAAGTTAAGCCGgATTACACTCgTAGcCGTggCCagagcgtcGAAGAtCcTgacggtaccAgcaCcgtagCGTTCCACGgGGcGAGTcGAGGTGGAGTTTGCcCGGCTgCGACCcTgAACacGGcCCcgtaCCgtTTtcTATacAAaTGCTcCgACTGTTGAgAGCGgTCaGTGGgCagcGtTagcgtgGGgGTATggACaACCGCaGccAgTAACCGCGCACCtCTcaaACCGTTGcagcCCcgcgccCGAgACCaTCGtgagatTcATATTGGGGCtCCgCTggtcAaCgcctcaAGGCTAtTaatgggTGTCgcTATgagATAAGcATtccgCTCAATTACAaACgGGTCcGCGCtCGAAGagAcTTCGTCTTATCTCCTTATtagaggccacgGgTGGGTGAGATCAGAGCTACGCCGAGgGGGACggAGATAgAgCGGGATGTaTGGCGaATGGAAcAGCGTGGTGGcCAGGTCCGCTAATGCCAATTCAGGATAGCCGGGGAACAATAGAAAGAATCTGATATCGTCGACTGataCcggaccgAGccaaCTcCCTAaCTACATCAcgtcAGGCgAGTgcctaGGtgtCCGAggTGTCGGTcGCTCAGGTCATAcGAGGtCcAGGgAATGTCcccATGGAGAtcgcCAATCATCgGTCgttgGgttgGGcAAaATTgccTGTcCGgccCCcgcAgCCgCgTAcTGgTTCCCtctGACACGTCaactAgGGGTAaattGTTCATgtGGTGCGcccagcgccCTTAAACGAAGATtcGACTttAccCgGTgccGATCTCGGCCAgAgATTgaaGaGCccccGaCcgTtCgGgTACAAtCAGCGGCTTGCCAGGGTGaAcAcGgGGCCgcaaCTcTCCCGGGAc
>xcm4379.filtered
cgcaaagcaggtttacgtatagTtagtgggagacgtgtaacaggcctgacacccCtgggagttacaacccacaccggcacaaggcagagggagtCtctgtgtgGgagccggccgtgtcatcccggctacgcgcccgggaagccggtgccgcccgtgGggcaacagggcatgccagcaccatccggaagcgacggtcgtgtcacctggtagtgaaagtgcgtatcaatgtagtccaccctgtccgtgctagggcgcgaccccccccgcgtcgaggcgcagtgcccaacgagtccgctCacccaaagtggcccagaccccgccctcgctgggcgagtggtgcggcgcgggtcagaggggctgacgccgcggtgcgtcagaggcggcactcaccgggctgtggtcgggctacccgtccccgtcgctctcggcgctacaaggggagtacgccccgctcgccgcgcccggcatgaccgcaagccaaatcAgcgcggagtgacattgggcaccccgaggcagccagagcttgtgaccggggcgggccgaacgtggacggggggggaacggggggcaacgtcgaaggaggcgggccacagggggcaagcggggctcccgcccccgtacccacgccagtagggagaattgcgttgcaacgtttcgcccctggtgcgcgcAtctcgactgctgccgtcgtcgtgggcaagagacagtcggcagtcgagggtcgcaccggcggtcttccgctcatggccgcgccctagcgcgcatgaggcgcgcGtgggctaacgtagctcgtcttaaccgggGcctacggtcAgtgagctgtgcgtctggaccgctcggaaacgccggtctctggaggctaccccgggtggccacctgccccgtgggGgcccgcctgcccgaggcccgtccgggcgcccacccgcgcgggcgcacgcgttacggctgacgcccctcgccgtccggcgctgcccgggggcaagcctttggtctcagcccccctcagcacgagcAcgcagccggacaaaaacaactaggccgcagacgcatccgaccggtactcttgagagtgccccccccgcgcctggtcgccactgctccccccgctagcgcctccggaggcttagccttggcggttcgcgcgcctcgaaaagagtgtgtcccgcgtctctgtgcgtgagaaattacgttgcttggtcctcgttactacgtaggcgttgggatgcaaggccctatctccggagcacaaccgcatagcctgaacttcccaccaatacctattccgccgctatacctcccagagccggcccgccctcaccttgagcctgtgctgacgaactcgacccctggtgtccggagccgacagttgatcgttggccaccgagctgttaaccgatgcagcgctccgatgcctggccttctacggccgaccacacaacaaaaaaggggcagctgcggggttgaggggcgggcgccctgccaacgggcccgcggtccgcCtgggctaggagggtgagatccggatctcgccccgcctgttctagcaccgccgtacaccctcggctgcctggcgaccatgtgccccatccggaaggatactccatactcctgccgttaggagaagttcacgcgttccgcgcctccggggcaggcgctcggcaggccatcggaccgcctccccgcacttgggcgcgcctccgccatagggtttcccggcaaatggacagccggcaatcgcttgcagaggcagcaggcaggcacgcggtcggccacccgggccctggaagcccaccgcagcgactcttcgggctacccggggtggtgtcggatgcgtggcgccgtgcgaggggttggtgggtacgtcgacctacactgtcggacttgggtgctgccatcgtagcccgcgtggagctgcgcccctggacgctgtgagtccgCtcgcggtccccgccacccgcccggattaccgcaggtaaaaacgtgcggcgcgcgcccatacgacgggggcgggccactccgccggcacccggaaggctgtgtgacccaacgaagatggaattatgtcgtgttccacccgtggtctgcaacgttcggacgggcccgcccgaggattgttggctccaaggagtcgaactaccgcacacactgctgaacattatgtgcggaggccgcatgacccctcggttcagttgggcCcccgagtggtagaagggggctaatcaaagctggtggcccgaggttgagcctggggaaaaggcacgcgggtacagccccagacacaattggcagaaaagagctcgctcggcgcgtccgctgtacccccgcgccgtttttcccggcgcttcttcgcccccccgtcggccactagaaggccacggtcccggatttgtattcctccctgtgctggcctttggcccctgcgggggcaaggtaccagaccacgcggcgagtataactacagacataccctcgtggccgcgtctcgggccgccccgacctttCGgtgggggccactccgatcgccccaaatgtttgcccgccggccggtaactatcgcgctagagggcgctgtggacactttcccaccaGtgggagtgaTggtcattccCcgcccgAgGttacatgaggccccccgtcaggacgggcgccgcgcgatgggcgtccccacgagcaccagggcgaggtgtaggtggggactcccaggggtgccgcgggccccaaccgaagtagcagggcgcgtgcggggttcacagagcggttgggtggccgctttggcgtacccccgccggtccaccatttagcgcggtcgccgcccgctacggggccggggcacccggtgcctttcctcccgcatcgaactatgttgcgGaggtaactgCctgcgaagggtcatcccctccgcttatgggttgtgccccgggtcgttcacggcggtgtcgcgtggcgcgggctcccagcggaccgccgCcggagcacagttgcccaacgcagccgcgcgcctacttacggggggggccggagacggcttcttctcgcagccggcgctaagtaggtggcggcatcgcgcgcttacacggttgtcttTgccatgaggaggaccggccgcctacgcggctgtttacggtggtggcgggccccccaaggcatgggcgcagctggcgccggccggtgcgacagagtggctgcgaactgtcatgggtaccggggcgtggagcagaagcccgaggcaaacgccagGccgcggccggtGaacccggtacacaccacgctacgaatcgtgatggcggctcgccgggtggatctaccccgcacgccttaggttggagcgggctagccagccgtcgggcggatgccaccgccaaggcggggccccgaccgggtgagcaaccgcacatagcccttcaggacaagcgcctacccccgcccccctacccatcctcgccgatctcgcaccgagttgtgcctaagctagcgaaatcttgaccgggttgtccggccccggcctgagccatgcgaactcggagctcgggaccccacgccctctctcgcAtattttgcctccccccctcggggcggctgtgcccggtgattcaactagtctccgtagacccctggcgtactgcggggcccccccggggggactgttccggacgcgaatcgcttcacgagcctgtgtccgcactgggcgccatccgggccgctgggcggtcgacctgtggtttatggacccctctgatggccgctcccgttacgagaagcagcggccgggtGgcgtgtccagtaataccccatcgcttacgcagcttgCacccgttaggaccaactatacgcgcgggctcaacgcgcccctgaccccgactgcggaacatctgagcgctgaaacgccccgcccgacacgGagcgggctgcgcccagccgacgagacagaatgtcggttttgaaagtgcaggcctggccgtgctcgtcccgcccgcgcccctgcgtgTggaacgctgtgccaacggccagctcccgcgggtggtcctCgccccaaggtgacatggcgctccggcctgccgggtggggcaccgggggaccgcagaagccgcgtggcacgggatttgctcctgccaacttgacacggagggcgccctccgtcgctcggcggggggtttccccgacgccctgcaaccggattgtgacagtaaatttgttcgtttacattcgggaccggagtattgcctgagacggggattgacaaggagacgtttccatacccaatcgccccacggcgggggcaacgaAGctgggccactgtcgccccgcacccgccgttggccgaggggggcggggaccccggaaagccgtctgggcggaccccgggcaccgggggggaacgcGcggcgatcagacggcccggctttcttccgccaattcgagggtttgaaggccgaatgagcctggtcggacccagatggtaagggcgagaggggggaaaccgcgtaggctcgGaccctgccggcttaggaagtggaagcaacgaccgcgccggcgcgtacgcctctacgcgactccggctcacagccgtccgcaagggcccagcgtcatTacCagcgccgtcgggtaaggccagccgtacgccgcaagggGttggcctccctattgcgggcattagtcggcccgtgcttgcgtcccctacgcgaatcagtggaatccacctaaaagtagcctacttcctcCagcgaggtctagccggactgcggaggtcgaatcgtcctaccccgcgaaaccggccgcaacggcagctactctcaagatgcggaggcattggccgggtgcccgggcgtacCgcAtggaggcgacgcaggcggcctctagcggttgcggcccgtcgcgtccaccaccgcgctAaggagccggcgggcgcctagcgccacgaggagggtagcgggcccttgggGttcggcgccggccaccagcgccttagtgtaggccgcggcgcggcctgtccctgcgcgttccccagggcttcccatccccgcgcgtgggtcggggccagggggtgccgttgccgtggtaagtgcggcaccggcattggggcccaatctcgcgacagctctgcgggtagtactccaccctatcgcagccaatttagtccgtcatagtggctatcgtgcgctgcgggcccctggctgccggttagcgccggagggctaccccccggaccggGccgccccccacaacattacgttgcgccggtggcgcggaggcccgccggggggtctggcccgcggtacaaaggatggccacctgcgaaaactgggtcccgattccccccttcttagtgaggctcgtagagcctggtcgcccctggctatgggtcaactcgggggatacctccggcgccggacgctcgccgcgcccccgaagtgccggaggtccgctggccctctagcgggcctagggcctgaatccgggcgccgccgcgaccccgagcacaaccccccagagcatcaacggccgcggttactgctggggacgcgattcacccaggagaagaccgtcccgcagctacgtgatcctaagctgagaagcctcgtgccccggccccAgtcccggtcgcgtcaggataccgcgctgactgccgaaatctagacgcggagcctcaggAtcttgacgaccgcgggggttaccccttggccgcgccacattctgtgtcgaaacgtcgtgacgtcttcgtggggcggggggggggcagcgagagcgggagagcctagagtacggacagcgccggggggagggcggagggcgcaatggtttcaaaatcatcttccgagtgaaaggctatccgagatgcacacgggaccgcaacgcccacctagagctcctcgcCgcgcgcgcttggccactataacgcatgcggcGacgagaccccttaccctgggaacacttgggggggggaggctggcgtcagttccgaacctagcgggcctttcctggccggacgggggccctgcctccctgtcgaggacgagccgtctagcggccgcgacgcttgaggtccccagatacatgcgatgacctaacccaagaagGtgaatcaCacggacggcgtggcagtcgaacctaagcttgaagcccccttctccctcagaactgttcgggtcgcggcagcccgctagtacGtgcgcccttctggctgcccccaaccgggcccgcgccatcgccgctcctccgccggacagtggtcgccacatactcaggagcgcccggggggccgcccgtggaccggctcgtcagcctctgatctggcccccattggtaggccgtaccccggattaaccgcgcaccggtccccgaggaccgaagccaccctcccgggcacccgcgtctggtacccggccccgcggtgtatacacggctcgAactcacttaacgCccggcaggcgaaggtaagcgggcccggatccgaccggcggtgcacttctcggggcttcgtgacggcttacgcgcagcgggagcgaaccgatccgcctccgtcgcgtagtcgtcgtctcgcgcgccccgccccctgcctgctccggggcaatttcggggaggggcgagcccgtcttagtgagccccagggtgtgggcgcgaaaggaagccatacCttctgagttccgcgcgggcccaAatgtctctgtcccgggggcaactccgtgctcgcggcggcaggcgggccagttccagctctagcagctcactcgattgcaaaatccggccccctcAgcgtctatgagctacagtaggcccatgcgtcgtgttcaggcgcgccgcagtcgatcgcctccccggcgcaagggaaacctaatgtcgggtgccctgtccaactgacacggcgcccccctcaggcaccgtgtcaaaccgcagccatacggccccgcccgtacctaaggtaatcagcggaggctgccttccgcgtccagggttctagggtcgtcgcaacacgctcctgaccggccgtggggcaactcggccgagtgccctagtcggatggccgccctcagcgtagttctgggttcgtctgaacatattccaggccgctatgcggaaggaagggtagcgtagaccaagtaagcctggcgcggtgacccaatttcctgtcccagacgcgggtgttcgacgtcgagacttcaccaatggtcatcggctgcactcgaacattgagtatgggccgaacagcGgaacgccatatgtaacgcgctagtgacggtgcgcgctgcagaggccaCcaggcggttcggaatgtcccgctgggcccctcgcctgcaggggcgcacgacgtatctagagcgcacagctgttaggagcacagactccacgtgtcccgcgctaacgcgctccccccgatgcggcgagatgacagcggtcgtttggtctcgccactcgCgtggaaggcccgccatccaacgttatcgcctgggggcggcattttggtaccttcggtcacgctcgcctgtggggccgccctgaagcggaaactgtggggcgggttgggggggtcgaggggatcttggccggccatggcgctcggtccgccgccagtgccagggcgcggcacagccccgcgtaccgggggggtggcccgccgcggttccggccctggctcgcgccccgccccgcccccggggcctctaccctagcctcgtcttgttcaccggtgggcgtttccctgatatcatcgtcgccacagcccgtctggggtgaaagtacggtaggacccgtggaagcctgccgagcacgcggttcacggcgcgcggaggagcactccctgggcgggccaactcacgcttcgcaggttgccttgggtggccccgcctcttttgggcaagccaaccgatggcggtcgggattgccatcgcagcacgggcgcccaaagcccgtgcggccgccccagtgaactgccctctcccccggaagcgcccagtgcgcgaaccggaggcggggagcaggctcccggggcccCgcagcggtagcgacaggtggttaccacgccgcacaccgatggctccccatcgccgtggtccgaggcagccggctggcctcgggagcgcctcggttaaacgccctcccgccgctccgtcgcttgcgtcccccccccccagcccaattagaggggaccgtgggggcgggctgtcgctcagggaccccggcacgtcggccagcacgcgacgcccagcagccggggggacgtgcctgtcctcccgggccagttttccaactgtttggcctctgaagaagctaccgctccgCgccggcgtcgtcaaactgctcacctccaacccagttgagtctgtgcagcgccggcttcagcccccgcgcgccggggccagccgttcgtgcgctctgcgtggccgtctaagtcgcgaggcacagagggaagtgcggcgacccgtgccgtttcctttggggatcgtgtgctatcagcgttcccgcatgtcgatggagaggcGacgaagggcattgtgcgccgcctaacgcctctggcccatgtaggggtacacgggaccgcgcgcagaaagtatagttttgtacgcccgccttgtggagcaacacaaggcgagaaaggacacgccacccgaccccgtggcgtttgtcggtcagatgccggccgccctccatcgttctgattgctcgtagggtggccgcccgttcatacCaccccgataggccgtaccttttaccggcaccctcctcctctcctcgatcgtcaagacgcggctcaCagcagcgtggactacctcgtcgtcacgcccacgacgggcccgcgagggcgcgcgcggatccaaggacccgacgaggtggaagcactccggaagccggtacaccaccgcagggccgagagtccatcagagatGggaccaaatcgcttggcggccgggatcaatcgtcgtgggggaacaaGCAgggctttacggtaagacccccagtcaccgggtgcagtgaaactacgaaggggggcgcctagtcgcaGgaggggatgcgatcggtgaccagcgagagagtggctcgTggggacttctcggtcgaagttgtgccttccgcccacgtccacactgccgtggacgacaccgagtcgtagtggggaccgcacccccacgcggcgtcgacgtacgctccgggccgccttcaccgttcgctgcgggatacccGcgagatgcactcCcgaggttcggagttgagccatcggactcccgaggcgtgcagccttggagggcattcgtagaaactgcggcgggttgctcctggcgtcacgcgcggaggccgCcgcaagaggttgtcccactaggggacggcgtggagctgggcggacggcttcggtagaagcaccgtggttgacaatacactgggccagcgctctagaAcataggcactaggcgagagggccgcatcgcattagcgttagagccctaatacagcgactcaaccctgctgcgcccgtgggtggataggacgcccacacccgccgccgtacgcacggcgtcacgacctattgctcgaccatcgcgctgtgctcgacagggtcgcgcggctcccgcgcaggcggtcaattttagacactgtacgcccgacaacctttaggccccccgctcccggctggaggggggagatggtcgccggcagcattacttagaccgagtccaacgttgtcgctcggtggaggcagggcgttcgcccacgcctccggctgccccgcttcccaggtccggggggtcgtcgctctggaaccgtaggccggttctggtatagcctgctccccgtctccccgatgccgcaccaccttgacgggtcaagcggtgcccccccaccgcgggcgggcccagcttattcggccgccctgagtgtgcctcccctttactgtgtaccgGaccggcccgcccatcgggaaccaaccggcgcccgttcagtgctggcgggaggccccccccacccctccagggggtcggcggtaacgacaatgggacccaggcgaccgtccagtccgccagCcacccggggcgacgaccccggccctTatgtccggccccgtattCgctacacgccggccaaaagcaacatacggattCtgggcatcatatttgtatcacccacaggccgtcctccgttgccacgggacgcgtggatctcgttgggatcggttcgaaccgggcccccttctgaaacgcaccgtagccggcctgcgcaacgacgccacggggcggtcgccagtcgcttgtccccgggggcggtcggcgggctggtatggtaaactctatcgtcccttGagggaacagattcgctGtggggcatatcagcccaggggtatgggcgcctgtttcccctcctgatctcaccccgattgcggtagcgcgcgcgcaaaggtgccacgagcttcgcggcgccactctccccccgcgccggacgaggtcgcccacaggtgctgctctaggtggatgattgtcccgggcccaggccgcggcgccatcatttgccgttctctatcctcgccccgtcctgtatgcaaccgtcccggaccttgcggggggtcacgttacccgttggtcaacggacgtcattctcttctagctttagggacagatagtgcGgggttcgagccggagcgcgcgggatgcatggccgcccttcgggtggcctcagcccccccgcgtgggtgcgctggcaaccccaagcaaacccggccgcgagaacggcatcggcgcggcgttgcgtcgccttctacgcaactcgcagaggcgggatAaatgccgctgaggcgctcgcagggacccctgcacccgacttcaaacgcctgacgatgccgccccaccacccgtgaccaaacctgcacgagccccgacggctaaaAtctcacggtacaggatggttagtcctcaggagttgcatgcgcatcggcttgcaGtggtgatcccgtcgccttcaaggccccgcagttggctggggcctcgcggcagccggctacaaccccggcacggcttggcgcgggtgcccacggccagttagaggttccccgtggcacgggatcggcgggggtccggggtcgcaggggccccagtcgcagcgcctgcaacggcccactgacgcgcagcccggtcgcgcggcgGgccgagtctaGttcgagcggcgggatggcgttacggacgggcgtcgccataccatcctgcggtgggaaaggtgccgccgggtgccgttctagccggaccggaggaaggccgccgggccccgacttaccggttgggggcactgtCcggggaacgctccacccatcatcaccaagttAattcctcggatcctcctgcggacggccgggccgcCaacgcgcccgaagtcgtccgccaacgagacgggtcgcggctatggaccggtctattgtgatccggtgattgaagaatcacaagagcggtaacgaacgcgaagcgggtttatcgcgcctcctctgctgcccccggacagttCgcctagccccggcccagccagccagttgaccgcAacgatgagctataagctcacggcggccctgacgacgagtcaatacggggtgttcggcgacccttgctcagcgtccCttgggcggccTagtaccagaactcttagcgcaacgcacacctcaacgccagggtgagggaaaagaccagagcacctcgcccgcgcagggtgcccgccgcggcactacggacagggggtgagctcaagaagtggctgtaggtgcggggcaggcgcgcggcactcccgagggatgctccgtgcgggggcagccgcggacggcttctgggtttcaaacatccaggcTtccgcttcaacccccacggccccgccagtcatagtcctcggggggggtagggcgctGGGGCttttgtgtcccgcggcaggtagagattcCccaccctaaagaggctctcgcccgccgatgcccgcagggagacaggcggcacaaaagtcatgtggcaagcgccGagggttgggccccttggagggcctgcgggcggggattgagcggcagatgacagatggccgattgatggggcgccgcggccagaaagggcgcgtaggggacgctgcgcgtcacccccgaaacgagatcagcgctgggcggcgcggttgccccggatcggggtggtcccttgggcttggcccagccggcagcggcgggcagggccacCcaggtacgggcactacagacgtaccctgcgatcccctcctccggtttcccccttcccatgacgcgatctgcgtcctgtctgcgccggcgcggggaggggtgtctcaccggagacccatggttcccccgctgtctcatggctatcgcaacgtcaaagtggcacCgctaatgagtagggaccgaggccccggcgagacaagcgggctggaagtcgatcgctgtaggcgtcgcgaggcccaggacccacatagggggggacAagctctgcgagtagcttcaggggggccAcagaggaggccttcaccgacggcggcgcggtcgggacatgaggtagaaagccacagggagactccgcaccggagggagtgcgggctggggtcgaaaggagcgggcgaggcacgaggggcctacccaaggggcgtgcgtttgcggtaacctaaaggcccgctacctggacggggtggagcggcgcggcggccccatacgtccgggtcgcggagagggagaaggcgaccgtaggcgttgtcccgcgacacgcctcaccgatccgaacgccccgggagagccgggttggacgcgttccccgtagcggccccgcgcgaggccgcccggtgaggggcgggacgcaacgactccggccgcgacccgggctgcaccttccgccgggcccctgccgaggtgggacgtgggtcttcgaagtgtacctgaaaTatcgcgagcggggcgctaggctgcggatccctccctcgcgatacccggccaagccccgtgcccgggtgggggtgggttatctgcgcggtgtctgcccgcccaggcgcgccgcgttaacgaacgggaggaccagcgcggaatcgtcgtttccgagcccgcacgcccagggagtgaccggcactgcggggggccgctggcgctcattcggccgatgcggcCcggcgcatagctccctgctatctactagtgatgtatggcccgccccggggggaggcgcggtgggtctccgacgccgctttgccgccggataggggaaggaagacgccctgagaataactcaccgcaccccctccgggcggtcgagcgtgacgcgtgccagtcGcccgcacaggcagggcacggtcagaccaggttccgtggggaggggtcgggggtagaggccgatgcacgggGcgaccgcgtgaggttggaccgagtgaggttgagtcgtcgcgcgctcccggacgggcggcgcgcgccagtgctcgagtctagcctgtggggtactctgcgcagggttaattgcgctggcagcccagtcagttcgccttgagttatctgtcccctttcgcgatctcatgcggtgggcaattcgtctacggcccttcccaggctactgcacggcccatgctcgtttaggatctCcagccgcgccgggccgggagggtatgagccctggtgatgccgacatcccccgagatgctcatcccctcgtggcgccctggcaggtggacttgggatggccccatacgtacggacgactggctgctgcgggacatggtgccaatgggaccgctagtccggggggtatccccaatgccccGGgcacgcactttcgggcggtggcggttcgcgtgagcggggaaacgcaccagggaagctgtacccggggccggagtcgagcgaagccgctggccaagactgattGctccggcggtaacgcaacccctggttatctaCtcacggtgtgacccgagccgacccccaatTtctaacccgataatgcggtaggacgtttccggtaagggccgctttacggagggttaggcttctcaccccgccgcattcccgataggggccccaggcccaaccgaccggcgccctcccgccCGcatcacaggggcagggggctggaacccctcggcgccccacggcgcccacaggcgtgtcagcatccgccctgaggcaaggcttcttgtgccagcgcaggcgtccacctacacgaaaggaggtctaatggtaggtccccgaatggtgagcgctggcggggctggggagtctcggcagcgcccgccccaccgcgcaggcgcgcttaccctccctggtagccCgatctgtccctgcacccagggtggtagcggctcacctcgcagggcccgggctatgcctcaccgaacggtcccgaagcctatcttccccgttgtggtgccgcctcgatcctcgaaccgcgtttagctctggacgctctgaggatcgaggcggcgcgtttaagaaaaacacctcgtgtacaatgtgtccccgccgcagagctatggaaacacgtggacagtccgagagttgcgggtctagcaggaggggcgccagcaggactgccacacagtcgcgatgtagtcagggaacagGcGccAtctcaCtgtgaccCaccgattgctcagcagcgctggaggcgccgccgccgcccacccggcccccccggaaccgggctcgacgaccattcttcgtgtgccgaccggtcgcttaccacgcgttTgtacacggtcactcctAttCcgctacacgaaaaatctagcaccaagctgggacgggCcgtgggggctggcccagctgtcccctcggttgttgCgaacgagtccgcggacgtctcggctagctcttcgcgttcgtctactatacatcacaagacaccatggcccttcgagagtcctgagggtgacgagcgcggccggcgcgtcccgtcccaacctgagtggagccccgtagagggTgacgggctggcacccaccccaaacgttcgtcctggcctgtagcccaagggttgatgagagggctctggcggcaggcggttgatcgcgtggctgcgcgtacgactctcttctacgctccaaagcAacattctgacagaggcctcggtgcagccgtcggctccgtaggaactcacccgtctcccgtgtccctgtgcgtcgctaagagagcccttttgctggccgctttgcctcgcctacaggcaggtggcggccgggggtgggacagggtccgccggaccccggtcccagtaggcctgaggtgggactcacctcgacccattcggtcatggaaggacgctccgtttcactttactatcaagggcggatcgctaggctccggagagcctcgcgggggggcgtaggggcggggtccgaGtgggtcgatgagtgagcagccAccctctcgcgcgcttgggaggccgtgtctcatagggGggccaccatgagctcacgtgcaccccctgtctcgctttgcatccctggtacagccgcacttgggctcggcgaagcagtaccggtcgtaatgggctagctgacagtgaacgcctccctagtgccgcacaatagtTataacctcaacccgcaaCttgagagcgtgtaccagctcacgatgagtgaggacctgcaggtatagtctgacagtcgggtggactcgcggacggcggcattgtggcCgacctgatgctcccgcgtgctggcccagcgtgcactgccccggcggacctccgaccgcaccagtagagttcgggctaagcccccaatccttccactgtctgcaagacgcgcgcgcttggcgatacccggggggggagcgcaacggtccaagggcggcgggctgctgggccggcggcgcggcggggcacacgggggggcggctgagaccgtttcgtggctggccaggctgcagctcccaaagggcgtcagggggcatccccgggcgggagaggccgcgacttctgatagtgggtgccctatgctggtgaactatggccgttgctctgtcccagggcccaggatggcgggaggtacatgtgcagcaagcacgccggaccacgtcaggcgagagaggcgtagggaaacggcggggaggacgttttcgaggggggggccggtgctcgccacggggggctgaacaccagtgaaagtgcAatcccggCgctgaccctctcgccgccgatgccgccaaaccccaaagattaGcctccctaaatcatcgtgggcacgcggtcgagcaaaggggcgggcttgtagctagactccagcctcgttcgcgtctcgttctcccttcgagggccttgccagggtccGccagaatcatctcctggctcctttgtagacggcgcttattgttcgcccggagttggcggaggacgggcaagtggcgtggccccctactagtcactgtgtagttcgccttacccactccgtcgctaacgccgctgggcgagtcggatgctgtggaggcagcaatacgggtctaaggcccactacacgaacccggaacggcacaggattgtgcgagatcgggccagccgccattcagccctatacaataatacccccgagggggggggggccgctaagaataggcgccaccgcggctcttggccgcacgcccgtccaatgtgTttacgtgttgcccgacccgtcccggttcttagtgaggcagccggacgaggtagacctcgagcgcgtgggcagggcgaaaatcggcataccatgggggaaacgaccagcagctgttgcccgaggggaggacatcaacgtagccggaatgccggggaggccgcgacgggcagaccgatgcccagcgcgtgaccaacacaatcttcggagagtctccagacccgctgattccgaaaccctcccCaatagccctcacgcagagttcatgctgagcgggctcgcctcaacagcacgtgggaacacgccgggcctagccgaacttgtatcgtggggccacgccgtcctaagcgccggcattcgctctcttttagcatcggagcctctacggcgcctcgtgctgcggcgtcgaccgctctgtttagtccgcacggggggatgcggcagcgcggtaagctccgttgcccgtgggcgctgttcagatacaactggcactttgacccgcggtcatgAtttggGGctgaggtcagcctcctcTagggcgccccggcgataaagatcccactagaacttgctgctagtattgttccctgctgggccaaaggcagcctccagagcacacatgcgactgtgaaaggtgagcggcgctgccgaggctgcccctcTacccggatgaagtcaaagcccgagcggggcggcccagcggtgcacgccggagcgctgagGatatatgcGgccacgtgccgcacatgtcgctccgggcccggttgctcctcttcaagcgtCgcgctaccggccgggaccgggcggaacgatacctcccattagcggcccagCggcgggagccgcggtcggaacgccgCagtgatctAggtccgccacgttcgggcagctcgaaacctcttactttacaactccggaggcgtagcgattcaagggacCtctctagcgcgcctgcgcctttcccactatacgtggcagtcagcgggcaggcccgcttggctAcatgcgactccgttgaaacaccctcgtcagtccacgtcgggggccgacaacgccgctaaactcacagcctccctgaggctgctatgcacacttacctcgcaccgtctcgacgcctagattgTacccaacctggtacacctcggcccgtCctacgggcgcCggccgttggggggcccccccagCtcagtgccagcttcaggttccacgcagactttagcacccggatctgggagatggaagagtccacacgttacacatgaataaccctgatttgcgggtgttgtccaacgcgtccggcacattccgagccgccgcgcttcgcgggcctacggctcaaaactggaccgtgcgtggggagagccgtacccgccgcgtgcgcaccggggccgGtcaacgttcggggcgggggtgaGctagtgggtgaagagtcctcgcctcgcaggggggcacctctagcaacggccggcgcgccgcagatttcagtggacgtccccgccactgagaccagttactacggccttaccttctcggttgtctggcgcccccgccatCtgcgcgtcgcgatcttaacaccggctaagtcctgccaagaggtctaaggcaggcctaagtgggtccgcgggcttcactatagccgttcttcgctgcaggccgtcgtaggggaGccctcggcacCtcccgttgatcTgtgctgtctgacgacgaggcaatggctaacgaccgaactcctctggcaccccaagggtggtgcggTgcgatcaTtcgccatgtaacgcgtcctctccactgtcgcaggcgcgcttgccgaggtccgctgcggCcccAatgcgggcgagactcctgggcagggggccggaaaacatggcgatagcgccgtaaggcaagccgggtcagccaaacagcatagtagcgaacctagatacggtgagggaggggggggccgctcaccaaagcggcgagcggcggtgtggcggcgaccagccctgtttgcctagttttcaacactggcctcctggcggtggcaagacgccgcgcgcagcgtacatgcccaagtcatgcggaacataccgagctcgctcttttccctcagccgccctcggggtaggggccctccttgtacgtgctggcacgatgtcccggtatcgggtcGgcaacctcGctgggagattgacgAagcagatcgaGacgggccattccagctggtacccagccaatgagcctgcggcggggattctgccggtgaggccggAtgctatgtcgtcccggcccctcccacgtattggcccccgcaggcaatagggagtcccccctgccaccctaacatctttctactgcctcggcgacagtcgtCgcgtgagcggtcgcgacgccgtcaccatacagggagcggcttaacgggcacgtacgcgcccgtactacccgcggccgccagccggccacaggaagtgccgaaactccgcggtcctccgaggaacgcggcccgcggccccatggagggAgggggaaggggatgtcggcacGagtgccatggaggtgcgggactttgagtcctgacgcgcggctagctcctgatccgccggctggtcacgtggctgccaggtcacctcagatccggggGgtcctccagcaggcgcccaccccggtctcggagggcctcccgacggggccgcgctccggccgcggtagggtccgggcccccccccttacccgcccgataaggcacgctcccaaattcctggacccgtccgggcattatgcatagtcagcgctacactcccaacggggtgtgcggggcctctccgccgccccagtcgcaggagacgatgcaaaggatctgtcccggtcggccgtcgagcgaaacaaccgggggaatcgaaaagcgacggtcgcgggggcgccgccgaatgccgagcgcgattggcagacgaccggggtgaagttccggggtcgcgcaattactaaccccaagggatccccgggggccgagggccgcacggtggtcccagatttgtagCgttcgAtgcagcgggatacagcgcgggcggaatgcgtagcctgggtTttccccgCaacgggctggggtcgcGgtcgtgaGgcgggggcgccccgctccggaggggagcgtagagagtgaggctaagacctacgaaagagtgcccctggctagaggtaagagccttatgcctcgggtccggcgacgcatggcgtctgctgcacaggcggggcacgtgaaccgactaacagtttcccggctgattgcctcggcccaaacgctcgctcccacggtcggcctagtgaaccccaccctgtccgttcggacaattgcgcggacactgaacagtccagggactcgggccggtccgggtcggcaattggtttcCaagtcggtggcggcctagacctccggacgaccggAaagcgcgtctgctagagggcggggcgcggcggcggaagtgggtgtggcgaggaccacagtccctcaccgtcgaagcttcatcgtgtatgcgcctccgaactAagcgtaaatagcacagtctgtcctgtgagcccgcccggtccgcactcgccccctcgcgacccctctactgctacctctGgctcgaccTctaggccggtctcctagctcccgctcactagtcccggtctgtcgttggggtgggtcggggtgTcctgcgtgctggcgggtcgacccacctgcaggccgtatctgtgtctcgatcgcccgggcataggctggcgcccgagccgctatcacggctccatgccactatatcgggatggcccggggctcactatcattcacagagacccgcggctcaaggtatcgtcgttagtgtgcacgcgtcccgaggccgccggaTgctcagcgtctgagatccgggtcgcggggcctatatcgacgcgctgagagactagcagcgccccatcaacgaggcctgaagctttcgttgtcccacgtacttggcgtttagttattgggctggccccacaatagaagcctcataccgtggctgaacgcccctggtgctcctctccgcgtccatcctctcggggattctaccgcctcgttaccactgactcgacagacatggaacgaaaatggcctcgtatggcaccggtaggggcccgcatatgggcttctccccctgagcgtctgccccccccgcgagcggcctgacggaaaggcagggccatcgggaggcgggagctcggactcccctaggtatggccgagcgacccatgtgtttgcaccgagcaacaacagcgaaccgcgaggcggactcgtgggcgcgggccagccccgtcgccggggctgcagcagctcgggcgcggtagcctgcgctcctcgcgtcgatctacgacggtccgggttgagcgagacccaaaacgtggggtagaagtgtcaatagaagcacaccgtccccccatcgcaggggggttcacgggcctctagtcagaatcagaatgcctctgtgcaatggccggactcggcccgtggagtctcccctggcgcagtcgggaccgcgggtcccattccagctctttcgctaatcgcatgacgggaccgtttagggcggggggaaccgccaacagcgcccactaccagctagggtgagcgaacgaacagccgaggcgccccggctgtgggccgggagcgctagattttaggGccggaggactccgagcggtcggccactgtcatctcgcgacccgtacttgtggtagccttgggccgcccggaacggcctgaacacccgaccagtgtggacgctcgctcctgtcgcctatcccagccccgccgTcccggcccagcgggccacgttagctcccaCGgaccggccctgacaccgcgtcccatggcctgattgaattactcgtgggccgagtcgactgcgacgtgagctcgtaccccccctagttaggataccccggatgttacgcTgatgtgcgccataGtcgcgctatcgcagggtgcaggcagctgagacgtaggccActcccccaagaacggcgcctgCacgCcgGggcggcctcgggctacaccagtatgcctggccTcggctcaggccgcgctgcgacctcgggattcagggtgggcatgtccccgctagaccgggggacgcgtggatctaatgagtactgctcggctgagtcgaggcacaatcgggtacgcctgggcgtcggccaccgaacctctagagctggggtgAgtcctagcccgcggttaggtgcgatgtggtccatcacccccctggctattttatggggctcgcccatgcctcccagccgcgcttccgatgccggcccctccagcaggatggggtacgggtggcttacgcTgCgcgccgcgggtccgggcggtggggccgaGtgcgcgcgggtcccgtggtcccagctcccgggcggatcgtcctcctctctcacaaggcgtcccgagccggtggtcgccacgtgagcgctcTccactggccaaacctagcgtgctgccgtctgcgtcacgggatacaccgatcgaatgtttagacgtgccggcccgcctgttccgcgaggtccgctaaacgggccatgatgcggaggggcggttcggggcgctggccgagccacaaccaccatgcccctcaggccgggcggcgctccggggctcgccggcgggcgtgacgctgaccggaagaggccgaggcagggacaacggtgagagcgtctggagtgcggacggtaccggcatcgtagtaccttgaagcacagcccagatcacgacgcaactaagcggcgtgccgggtacacctgcgtatagtcctccgcacggagctcctggtgacgtggcagagctaagcagtaTcatcagcgtgaagacccggggagatataacccgcggtgagcaggattccaagttagcacagcagcgcgcctacgggtaggatgagatgccccccacGagtttgtcggtcgaggcctcacattcctcaatgggccgCgcggcgaggcggacgctccgtggcgccgtgagggatcaTcaaatCagtcagcccgttatcccctcttcctgtagaggccacgagccatcagagggcagGacgtaattgtgaaactggctgcgggggacagcacaccctaacctcggcgagccaacttcggaactgataggcattgccgtgtagggataaatagggggcgagggagggtccccgcgactaggcaatagcggaccggaccaatccttcgatggtgcggcgtcgcttggaggcctaactgtttGcggcactcaccatcggaagggcgccgtcttcgaagggcacacccccacgtctcgcagcatgcaAcctgttgtgttgaccggaggcgccgcccgtgccCgcgcggaggtgcgcgagcctgttctatagtccaaactggacagcaattcgctgcgtaactttcccagcgcctgcggggacgcggtccttcttgcctgGcgccagctgtaatagggggccgaaaaatcccccaacggttgtgcctggttgaacatccaatgattctagcgcagatatgcaatccctttaaagc
>xcm4380.filtered
cgcaaagcaggtttacgtatagTtagtgggagacgtgtaacaggcctgacacccCtgggagttacaacccacaccggcacaaggcagagggagtCtctgtgtgGgagccggccgtgtcatcccggctacgcgcccgggaagccggtgccgcccgtgGggcaacagggcatgccagcaccatccggaagcgacggtcgtgtcacctggtagtgaaagtgcgtatcaatgtagtccaccctgtccgtgctagggcgcgaccccccccgcgtcgaggcgcagtgcccaacgagtccgctCacccaaagtggcccagaccccgccctcgctgggcgagtggtgcggcgcgggtcagaggggctgacgccgcggtgcgtcagaggcggcactcaccgggctgtggtcgggctacccgtccccgtcgctctcggcgctacaaggggagtacgccccgctcgccgcgcccggcatgaccgcaagccaaatcAgcgcggagtgacattgggcaccccgaggcagccagagcttgtgaccggggcgggccgaacgtggacggggggggaacggggggcaacgtcgaaggaggcgggccacagggggcaagcggggctcccgcccccgtacccacgccagtagggagaattgcgttgcaacgtttcgcccctggtgcgcgcAtctcgactgctgccgtcgtcgtgggcaagagacagtcggcagtcgagggtcgcaccggcggtcttccgctcatggccgcgccctagcgcgcatgaggcgcgcGtgggctaacgtagctcgtcttaaccgggGcctacggtcAgtgagctgtgcgtctggaccgctcggaaacgccggtctctggaggctaccccgggtggccacctgccccgtgggGgcccgcctgcccgaggcccgtccgggcgcccacccgcgcgggcgcacgcgttacggctgacgcccctcgccgtccggcgctgcccgggggcaagcctttggtctcagcccccctcagcacgagcAcgcagccggacaaaaacaactaggccgcagacgcatccgaccggtactcttgagagtgccccccccgcgcctggtcgccactgctccccccgctagcgcctccggaggcttagccttggcggttcgcgcgcctcgaaaagagtgtgtcccgcgtctctgtgcgtgagaaattacgttgcttggtcctcgttactacgtaggcgttgggatgcaaggccctatctccggagcacaaccgcatagcctgaacttcccaccaatacctattccgccgctatacctcccagagccggcccgccctcaccttgagcctgtgctgacgaactcgacccctggtgtccggagccgacagttgatcgttggccaccgagctgttaaccgatgcagcgctccgatgcctggccttctacggccgaccacacaacaaaaaaggggcagctgcggggttgaggggcgggcgccctgccaacgggcccgcggtccgcCtgggctaggagggtgagatccggatctcgccccgcctgttctagcaccgccgtacaccctcggctgcctggcgaccatgtgccccatccggaaggatactccatactcctgccgttaggagaagttcacgcgttccgcgcctccggggcaggcgctcggcaggccatcggaccgcctccccgcacttgggcgcgcctccgccatagggtttcccggcaaatggacagccggcaatcgcttgcagaggcagcaggcaggcacgcggtcggccacccgggccctggaagcccaccgcagcgactcttcgggctacccggggtggtgtcggatgcgtggcgccgtgcgaggggttggtgggtacgtcgacctacactgtcggacttgggtgctgccatcgtagcccgcgtggagctgcgcccctggacgctgtgagtccgCtcgcggtccccgccacccgcccggattaccgcaggtaaaaacgtgcggcgcgcgcccatacgacgggggcgggccactccgccggcacccggaaggctgtgtgacccaacgaagatggaattatgtcgtgttccacccgtggtctgcaacgttcggacgggcccgcccgaggattgttggctccaaggagtcgaactaccgcacacactgctgaacattatgtgcggaggccgcatgacccctcggttcagttgggcCcccgagtggtagaagggggctaatcaaagctggtggcccgaggttgagcctggggaaaaggcacgcgggtacagccccagacacaattggcagaaaagagctcgctcggcgcgtccgctgtacccccgcgccgtttttcccggcgcttcttcgcccccccgtcggccactagaaggccacggtcccggatttgtattcctccctgtgctggcctttggcccctgcgggggcaaggtaccagaccacgcggcgagtataactacagacataccctcgtggccgcgtctcgggccgccccgacctttCGgtgggggccactccgatcgccccaaatgtttgcccgccggccggtaactatcgcgctagagggcgctgtggacactttcccaccaGtgggagtgaTggtcattccCcgcccgAgGttacatgaggccccccgtcaggacgggcgccgcgcgatgggcgtccccacgagcaccagggcgaggtgtaggtggggactcccaggggtgccgcgggccccaaccgaagtagcagggcgcgtgcggggttcacagagcggttgggtggccgctttggcgtacccccgccggtccaccatttagcgcggtcgccgcccgctacggggccggggcacccggtgcctttcctcccgcatcgaactatgttgcgGaggtaactgCctgcgaagggtcatcccctccgcttatgggttgtgccccgggtcgttcacggcggtgtcgcgtggcgcgggctcccagcggaccgccgCcggagcacagttgcccaacgcagccgcgcgcctacttacggggggggccggagacggcttcttctcgcagccggcgctaagtaggtggcggcatcgcgcgcttacacggttgtcttTgccatgaggaggaccggccgcctacgcggctgtttacggtggtggcgggccccccaaggcatgggcgcagctggcgccggccggtgcgacagagtggctgcgaactgtcatgggtaccggggcgtggagcagaagcccgaggcaaacgccagGccgcggccggtGaacccggtacacaccacgctacgaatcgtgatggcggctcgccgggtggatctaccccgcacgccttaggttggagcgggctagccagccgtcgggcggatgccaccgccaaggcggggccccgaccgggtgagcaaccgcacatagcccttcaggacaagcgcctacccccgcccccctacccatcctcgccgatctcgcaccgagttgtgcctaagctagcgaaatcttgaccgggttgtccggccccggcctgagccatgcgaactcggagctcgggaccccacgccctctctcgcAtattttgcctccccccctcggggcggctgtgcccggtgattcaactagtctccgtagacccctggcgtactgcggggcccccccggggggactgttccggacgcgaatcgcttcacgagcctgtgtccgcactgggcgccatccgggccgctgggcggtcgacctgtggtttatggacccctctgatggccgctcccgttacgagaagcagcggccgggtGgcgtgtccagtaataccccatcgcttacgcagcttgCacccgttaggaccaactatacgcgcgggctcaacgcgcccctgaccccgactgcggaacatctAagcgctgaaacgccccgcccgacacgGagcgggctgcgcccagccgacgagacagaatgtcggttttgaaagtgcaggcctggccgtgctcgtcccgcccgcgcccctgcgtgTggaacgctgtgccaacggccagctcccgcgggtggtcctCgccccaaggtgacatggcgctccggcctgccgggtggggcaccgggggaccgcagaagccgcgtggcacgggatttgctcctgccaacttgacacggagggcgccctccgtcgctcggcggggggtttccccgacgccctgcaaccggattgtgacagtaaatttgttcgtttacattcgggaccggagtattgcctgagacggggattgacaaggagacgtttccatacccaatcgccccacggcgggggcaacgaAGctgggccactgtcgccccgcacccgccgttggccgaggggggcggggaccccggaaagccgtctgggcggaccccgggcaccgggggggaacgcGcggcgatcagacggcccggctttcttccgccaattcgagggtttgaaggccgaatgagcctggtcggacccagatggtaagggcgagaggggggaaaccgcgtagActcgGaccctgccggcttaggaagtggaagcaacgaccgcgccggcgcgtacgcctctacgcgactccggctcacagccgtccgcaagggcccagcgtcatTacCagcgccgtcgggtaaggccagccgtacgccgcaagggGttggcctccctattgcgggcattagtcggcccgtgcttgcgtcccctacgcgaatcagtggaatccacctaaaagtagcctacttcctcCagcgaggtctagccggactgcggaggtcgaatcgtcctaccccgcgaaaccggccgcaacggcagctactctcaagatgcggaggcattggccgggtgcccgggcgtacCgcAtggaggcgacgcaggcggcctctagcggttgcggcccgtcgcgtccaccaccgcgctAaggagccggcgggcgcctagcgccacgaggagggtagcgggcccttgggGttcggcgccggccaccagcgccttagtgtaggccgcggcgcggcctgtccctgcgcgttccccagggcttcccatccccgcgcgtgggtcggggccagggggtgccgttgccgtggtaagtgcggcaccggcattggggcccaatctcgcgacagctctgcgggtagtactccaccctatcgcagccaatttagtccgtcatagtggctatcgtgcgctgcgggcccctggctgccggttagcgccggagggctaccccccggaccggGccgccccccacaacattacgttgcgccggtggcgcggaggcccgccggggggtctggcccgcggtacaaaggatggccacctgcgaaaactgggtcccgattccccccttcttagtgaggctcgtagagcctggtcgcccctggctatgggtcaactcgggggatacctccggcgccggacgctcgccgcgcccccgaagtgccggaggtccgctggccctctagcgggcctagggcctgaatccgggcgccgccgcgaccccgagcacaaccccccagagcatcaacggccgcggttactgctggggacgcgattcacccaggagaagaccgtcccgcagctacgtgatcctaagctgagaagcctcgtgccccggccccAgtcccggtcgcgtcaggataccgcgctgactgccgaaatctagacgcggagcctcaggAtcttgacgaccgcgggggttaccccttggccgcgccacattctgtgtcgaaacgtcgtgacgtcttcgtggggcggggggggggcagcgagagcgggagagcctagagtacggacagcgccggggggagggcggagggcgcaatggtttcaaaatcatcttccgagtgaaaggctatccgagatgcacacgggaccgcaacgcccacctagagctcctcgcCgcgcgcgcttggccactataacgcatgcggcGacgagaccccttaccctgggaacacttgggggggggaggctggcgtcagttccgaacctagcgggcctttcctggccggacgggggccctgcctccctgtcgaggacgagccgtctagcggccgcgacgcttgaggtccccagatacatgcgatgacctaacccaagaagGtgaatcaCacggacggcgtggcagtcgaacctaagcttgaagcccccttctccctcagaactgttcgggtcgcggcagcccgctagtacGtgcgcccttctggctgcccccaaccgggcccgcgccatcgccgctcctccgccggacagtggtcgccacatactcaggagcgcccggggggccgcccgtggaccggctcgtcagcctctgatctggcccccattggtaggccgtaccccggattaaccgcgcaccggtccccgaggaccgaagccaccctcccgggcacccgcgtctggtacccggccccgcggtgtatacacggctcgAactcacttaacgCccggcaggcgaaggtaagcgggcccggatccgaccggcggtgcacttctcggggcttcgtgacggcttacgcgcagcgggagcgaaccgatccgcctccgtcgcgtagtcgtcgtctcgcgcgccccgccccctgcctgctccggggcaatttcggggaggggcgagcccgtcttagtgagccccagggtgtgggcgcgaaaggaagccatacCttctgagttccgcgcgggcccaAatgtctctgtcccgggggcaactccgtgctcgcggcggcaggcgggccagttccagctctagcagctcactcgattgcaaaatccggccccctcAgcgtctatgagctacagtaggcccatgcgtcgtgttcaggcgcgccgcagtcgatcgcctccccggcgcaagggaaacctaatgtcgggtgccctgtccaactgacacggcgcccccctcaggcaccgtgtcaaaccgcagccatacggccccgcccgtacctaaggtaatcagcggaggctgccttccgcgtccagggttctagggtcgtcgcaacacgctcctgaccggccgtggggcaactcggccgagtgccctagtcggatggccgccctcagcgtagttctgggttcgtctgaacatattccaggccgctatgcggaaggaagggtagcgtagaccaagtaagcctggcgcggtgacccaatttcctgtcccagacgcgggtgttcgacgtcgagacttcaccaatggtcatcggctgcactcgaacattgagtatgggccgaacagcGgaacgccatatgtaacgcgctagtgacggtgcgcgctgcagaggccaCcaggcggttcggaatgtcccgctgggcccctcgcctgcaggggcgcacgacgtatctagagcgcacagctgttaggagcacagactccacgtgtcccgcgctaacgcgctccccccgatgcggcgagatgacagcggtcgtttggtctcgccactcgCgtggaaggcccgccatccaacgttatcgcctgggggcggcattttggtaccttcggtcacgctcgcctgtggggccgccctgaagcggaaactgtggggcgggttgggggggtcgaggggatcttggccggccatggcgctcggtccgccgccagtgccagggcgcggcacagccccgcgtaccgggggggtggcccgccgcggttccggccctggctcgcgccccgccccgcccccggggcctctaccctagcctcgtcttgttcaccggtgggcgtttccctgatatcatcgtcgccacagcccgtctggggtgaaagtacggtaggacccgtggaagcctgccgagcacgcggttcacggcgcgcggaggagcactccctgggcgggccaactcacgcttcgcaggttgccttgggtggccccgcctcttttgggcaagccaaccgatggcggtcgggattgccatcgcagcacgggcgcccaaagcccgtgcggccgccccagtgaactgccctctcccccggaagcgcccagtgcgcgaaccggaggcggggagcaggctcccggggcccCgcagcggtagcgacaggtggttaccacgccgcacaccgatggctccccatcgccgtggtccgaggcagccggctggcctcgggagcgcctcggttaaacgccctcccgccgctccgtcgcttgcgtcccccccccccagcccaattagaggggaccgtgggggcgggctgtcgctcagggaccccggcacgtcggccagcacgcgacgcccagcagccggggggacgtgcctgtcctcccgggccagttttccaactgtttggcctctgaagaagctaccgctccgCgccggcgtcgtcaaactgctcacctccaacccagttgagtctgtgcagcgccggcttcagcccccgcgcgccggggccagccgttcgtgcgctctgcgtggccgtctaagtcgcgaggcacagagggaagtgcggcgacccgtgccgtttcctttggggatcgtgtgctatcagcgttcccgcatgtcgatggagaggcGacgaagggcattgtgcgccgcctaacgcctctggcccatgtaggggtacacgggaccgcgcgcagaaagtatagttttgtacgcccgccttgtggagcaacacaaggcgagaaaggacacgccacccgaccccgtggcgtttgtcggtcagatgccggccgccctccatcgttctgattgctcgtagggtggccgcccgttcatacCaccccgataggccgtaccttttaccggcaccctcctcctctcctcgatcgtcaagacgcggctcaCagcagcgtggactacctcgtcgtcacgcccacgacgggcccgcgagggcgcgcgcggatccaaggacccgacgaggtggaagcactccggaagccggtacaccaccgcagggccgagagtccatcagagatGggaccaaatcgcttggcggccgggatcaatcgtcgtgggggaacaaGCAgggctttacggtaagacccccagtcaccgggtgcagtgaaactacgaaggggggcgcctagtcgcaGgaggggatgcgatcggtgaccagcgagagagtggctcgTggggacttctcggtcgaagttgtgccttccgcccacgtccacactgccgtggacgacaccgagtcgtagtggggaccgcacccccacgcggcgtcgacgtacgctccgggccgccttcaccgttcgctgcgggatacccGcgagatgcactcCcgaggttcggagttgagccatcggactcccgaggcgtgcagccttggagggcattcgtagaaactgcggcgggttgctcctggcgtcacgcgcggaggccgCcgcaagaggttgtcccactaggggacggcgtggagctgggcggacggcttcggtagaagcaccgtggttgacaatacactgggccagcgctctagaAcataggcactaggcgagagggccgcatcgcattagcgttagagccctaatacagcgactcaaccctgctgcgcccgtgggtggataggacgcccacacccgccgccgtacgcacggcgtcacgacctattgctcgaccatcgcgctgtgctcgacagggtcgcgcggctcccgcgcaggcggtcaattttagacactgtacgcccgacaacctttaggccccccgctcccggctggaggggggagatggtcgccggcagcattacttagaccgagtccaacgttgtcgctcggtggaggcagggcgttcgcccacgcctccggctgccccgcttcccaggtccggggggtcgtcgctctggaaccgtaggccggttctggtatagcctgctccccgtctccccgatgccgcaccaccttgacgggtcaagcggtgcccccccaccgcgggcgggcccagcttattcggccgccctgagtgtgcctcccctttactgtgtaccgGaccggcccgcccatcgggaaccaaccggcgcccgttcagtgctggcgggaggccccccccacccctccagggggtcggcggtaacgacaatgggacccaggcgaccgtccagtccgccagCcacccggggcgacgaccccggccctTatgtccggccccgtattCgctacacgccggccaaaagcaacatacggattCtgggcatcatatttgtatcacccacaggccgtcctccgttgccacgggacgcgtggatctcgttgggatcggttcgaaccgggcccccttctgaaacgcaccgtagccggcctgcgcaacgacgccacggggcggtcgccagtcgcttgtccccgggggcggtcggcgggctggtatggtaaactctatcgtcccttGagggaacagattcgctGtggggcatatcagcccaggggtatgggcgcctgtttcccctcctgatctcaccccgattgcggtagcgcgcgcgcaaaggtgccacgagcttcgcggcgccactctccccccgcgccggacgaggtcgcccacaggtgctgctctaggtggatgattgtcccgggcccaggccgcggcgccatcatttgccgttctctatcctcgccccgtcctgtatgcaaccgtcccggaccttgcggggggtcacgttacccgttggtcaacggacgtcattctcttctagctttagggacagatagtgcGgggttcgagccggagcgcgcgggatgcatggccgcccttcgggtggcctcagcccccccgcgtgggtgcgctggcaaccccaagcaaacccggccgcgagaacggcatcggcgcggcgttgcgtcgccttctacgcaactcgcagaggcgggatAaatgccgctgaggcgctcgcagggacccctgcacccgacttcaaacgcctgacgatgccgccccaccacccgtgaccaaacctgcacgagccccgacggctaaaAtctcacggtacaggatggttagtcctcaggagttgcatgcgcatcggcttgcaGtggtgatcccgtcgccttcaaggccccgcagttggctggggcctcgcggcagccggctacaaccccggcacggcttggcgcgggtgcccacggccagttagaggttccccgtggcacgggatcggcgggggtccggggtcgcaggggccccagtcgcagcgcctgcaacggcccactgacgcgcagcccggtcgcgcggcgGgccgagtctaGttcgagcggcgggatggcgttacggacgggcgtcgccataccatcctgcggtgggaaaggtgccgccgggtgccgttctagccggaccggaggaaggccgccgggccccgacttaccggttgggggcactgtCcggggaacgctccacccatcatcaccaagttAattcctcggatcctcctgcggacggccgggccgcCaacgcgcccgaagtcgtccgccaacgagacgggtcgcggctatggaccggtctattgtgatccggtgattgaagaatcacaagagcggtaacgaacgcgaagcgggtttatcgcgcctcctctgctgcccccggacagttCgcctagccccggcccagccagccagttgaccgcAacgatgagctataagctcacggcggccctgacgacgagtcaatacggggtgttcggcgacccttgctcagcgtccCttgggcggccTagtaccagaactcttagcgcaacgcacacctcaacgccagggtgagggaaaagaccagagcacctcgcccgcgcagggtgcccgccgcggcactacggacagggggtgagctcaagaagtggctgtaggtgcggggcaggcgcgcggcactcccgagggatgctccgtgcgggggcagccgcggacggcttctgggtttcaaacatccaggcTtccgcttcaacccccacggccccgccagtcatagtcctcggggggggtagggcgctGGGGCttttgtgtcccgcggcaggtagagattcCccaccctaaagaggctctcgcccgccgatgcccgcagggagacaggcggcacaaaagtcatgtggcaagcgccGagggttgggccccttggagggcctgcgggcggggattgagcggcagatgacagatggccgattgatggggcgccgcggccagaaagggcgcgtaggggacgctgcgcgtcacccccgaaacgagatcagcgctgggcggcgcggttgccccggatcggggtggtcccttgggcttggcccagccggcagcggcgggcagggccacCcaggtacgggcactacagacgtaccctgcgatcccctcctccggtttcccccttcccatgacgcgatctgcgtcctgtctgcgccggcgcggggaggggtgtctcaccggagacccatggttcccccgctgtctcatggctatcgcaacgtcaaagtggcacCgctaatgagtagggaccgaggccccggcgagacaagcgggctggaagtcgatcgctgtaggcgtcgcgaggcccaggacccacatagggggggacAagctctgcgagtagcttcaggggggccAcagaggaggccttcaccgacggcggcgcggtcgggacatgaggtagaaagccacagggagactccgcaccggagggagtgcgggctggggtcgaaaggagcgggcgaggcacgaggggcctacccaaggggcgtgcgtttgcggtaacctaaaggcccgctacctggacggggtggagcggcgcggcggccccatacgtccgggtcgcggagagggagaaggcgaccgtaggcgttgtcccgcgacacgcctcaccgatccgaacgccccgggagagccgggttggacgcgttccccgtagcggccccgcgcgaggccgcccggtgaggggcgggacgcaacgactccggccgcgacccgggctgcaccttccgccgggcccctgccgaggtgggacgtgggtcttcgaagtgtacctgaaaTatcgcgagcggggcgctaggctgcggatccctccctcgcgatacccggccaagccccgtgcccgggtgggggtgggttatctgcgcggtgtctgcccgcccaggcgcgccgcgttaacgaacgggaggaccagcgcggaatcgtcgtttccgagcccgcacgcccagggagtgaccggcactgcggggggccgctggcgctcattcggccgatgcggcCcggcgcatagctccctgctatctactagtgatgtatggcccgccccggggggaggcgcggtgggtctTcgacgccgctttgccgccggataggggaaggaagacgccctgagaataactcaccgcaccccctccgggcggtcgagcgtgacgcgtgccagtcGcccgcacaggcagggcacggtcagaccaggttccgtggggaggggtcgggggtagaggccgatgcacgggGcgaccgcgtgaggttggaccgagtgaggttgagtcgtcgcgcgctcccggacgggcggcgcgcgccagtgctcgagtctagcctgtggggtactctgcgcagggttaattgTgctggcagcccagtcagttcgccttgagttatctgtcccctttcgcgatctcatgcggtgggcaattcgtctacggcccttcccaggctactgcacggcccatgctcgtttaggatctCcagccgcgccgggccgggagggtatgagccctggtgatgccgacatcccccgagatgctcatcccctcgtggcgccctggcaggtggacttgggatggccccatacgtacggacgactggctgctgcgggacatggtgccaatgggaccgctagtccggggggtatccccaatgccccGGgcacgcactttcgggcggtggcggttcgcgtgagcggggaaacgcaccagggaagctgtacccggggccggagtcgagcgaagccgctggccaagactgattGctccggcggtaacgcaacccctggttatctaCtcacggtgtgacccgagccgacccccaatTtctaacccgataatgcggtaggacgtttccggtaagggccgctttacggagggttaggcttctcaccccgccgcattcccgataggggccccaggcccaaccgaccggcgccctcccgccCGcatcacaggggcagggggctggaacccctcggcgccccacggcgcccacaggcgtgtcagcatccgccctgaggcaaggcttcttgtgccagcgcaggcgtccacctacacgaaaggaggtctaatggtaggtccccgaatggtgagcgctggcggggctggggagtctcggcagcgcccgccccaccgcgcaggcgcgcttaccctccctggtagccCgatctgtccctgcacccagggtggtagcggctcacctcgcagggcccgggctatgcctcaccgaacggtcccgaagcctatcttccccgttgtggtgccgcctcgatcctcgaaccgcgtttagctctggacgctctgaggatcgaggcggcgcgtttaagaaaaacacctcgtgtacaatgtgtccccgccgcagagctatggaaacacgtggacagtccgagagttgcgggtctagcaggaggggcgccagcaggactgccacacagtcgcgatgtagtcagggaacagGcGccAtctcaCtgtgaccCaccgattgctcagcagcgctggaggcgccgccgccgcccacccggcccccccggaaccgggctcgacgaccattcttcgtgtgccgaccggtcgcttaccacgcgttTgtacacggtcactcctAttCcgctacacgaaaaatctagcaccaagctgggacgggCcgtgggggctggcccagctgtcccctcggttgttgCgaacgagtccgcggacgtctcggctagctcttcgcgttcgtctactatacatcacaagacaccatggcccttcgagagtcctgagggtgacgagcgcggccggcgcgtcccgtcccaacctgagtggagccccgtagagggTgacgggctggcacccaccccaaacgttcgtcctggcctgtagcccaagggttgatgagagggctctggcggcaggcggttgatcgcgtggctgcgcgtacgactctcttctacgctccaaagcAacattctgacagaggcctcggtgcagccgtcggctccgtaggaactcacccgtctcccgtgtccctgtgcgtcgctaagagagcccttttgctggccgctttgcctcgcctacaggcaggtggcggccgggggtgggacagggtccgccggaccccggtcccagtaggcctgaggtgggactcacctcgacccattcggtcatggaaggacgctccgtttcactttactatcaagggcggatcgctaggctccggagagcctcgcgggggggcgtaggggcggggtccgaGtgggtcgatgagtgagcagccAccctctcgcgcgcttgggaggccgtgtctcatagggGggccaccatgagctcacgtgcaccccctgtctcgctttgcatccctggtacagccgcacttgggctcggcgaagcagtaccggtcgtaatgggctagctgacagtgaacgcctccctagtgccgcacaatagtTataacctcaacccgcaaCttgagagcgtgtaccagctcacgatgagtgaggacctgcaggtatagtctgacagtcgggtggactcgcggacggcggcattgtggcCgacctgatgctcccgcgtgctggcccagcgtgcactgccccggcggacctccgaccgcaccagtagagttcgggctaagcccccaatccttccactgtctgcaagacgcgcgcgcttggcgatacccggggggggagcgcaacggtccaagggcggcgggctgctgggccggcggcgcggcggggcacacgggggggcggctgagaccgtttcgtggctggccaggctgcagctcccaaagggcgtcagggggcatccccgggcgggagaggccgcgacttctgatagtgggtgccctatgctggtgaactatggccgttgctctgtcccagggcccaggatggcgggaggtacatgtgcagcaagcacgccggaccacgtcaggcgagagaggcgtagggaaacggcggggaggacgttttcgaggggggggccggtgctcgccacggggggctgaacaccagtgaaagtgcAatcccggCgctgaccctctcgccgccgatgccgccaaaccccaaagattaGcctccctaaatcatcgtgggcacgcggtcgagcaaaggggcgggcttgtagctagactccagcctcgttcgcgtctcgttctcccttcgagggccttgccagggtccGccagaatcatctcctggctcctttgtagacggcgcttattgttcgcccggagttggcggaggacgggcaagtggcgtggccccctactagtcactgtgtagttcgccttacccactccgtcgctaacgccgctgggcgagtcggatgctgtggaggcagcaatacgggtctaaggcccactacacgaacccggaacggcacaggattgtgcgagatcgggccagccgccattcagccctatacaataatacccccgagggggggggggccgctaagaataggcgccaccgcggctcttggccgcacgcccgtccaatgtgTttacgtgttgcccgacccgtcccggttcttagtgaggcagccggacgaggtagacctcgagcgcgtgggcagggcgaaaatcggcataccatgggggaaacgaccagcagctgttgcccgaggggaggacatcaacgtagccggaatgccggggaggccgcgacgggcagaccgatgcccagcgcgtgaccaacacaatcttcggagagtctccagacccgctgattccgaaaccctcccCaatagccctcacgcagagttcatgctgagcgggctcgcctcaacagcacgtgggaacacgccgggcctagccgaacttgtatcgtggggccacgccgtcctaagcgccggcattcgctctcttttagcatcggagcctctacggcgcctcgtgctgcggcgtcgaccgctctgtttagtccgcacggggggatgcggcagcgcggtaagctccgttgcccgtgggcgctgttcagatacaactggcactttgacccgcggtcatgAtttggGGctgaggtcagcctcctcTagggcgccccggcgataaagatcccactagaacttgctgctagtattgttccctgctgggccaaaggcagcctccagagcacacatgcgactgtgaaaggtgagcggcgctgccgaggctgcccctcTacccggatgaagtcaaagcccgagcggggcggcccagcggtgcacgccggagcgctgagGatatatgcGgccacgtgccgcacatgtcgctccgggcccggttgctcctcttcaagcgtCgcgctaccggccgggaccgggcggaacgatacctcccattagcggcccagCggcgggagccgcggtcggaacgccgCagtgatctAggtccgccacgttcgggcagctcgaaacctcttactttacaactccggaggcgtagcgattcaagggacCtctctagcgcgcctgcgcctttcccactatacgtggcagtcagcgggcaggcccgcttggctAcatgcgactccgttgaaacaccctcgtcagtccacgtcgggggccgacaacgccgctaaactcacagcctccctgaggctgctatgcacacttacctcgcaccgtctcgacgcctagattgTacccaacctggtacacctcggcccgtCctacgggcgcCggccgttggggggcccccccagCtcagtgccagcttcaggttccacgcagactttagcacccggatctgggagatggaagagtccacacgttacacatgaataaccctgatttgcgggtgttgtccaacgcgtccggcacattccgagccgccgcgcttcgcgggcctacggctcaaaactggaccgtgcgtggggagagccgtacccgccgcgtgcgcaccggggccgGtcaacgttcggggcgggggtgaGctagtgggtgaagagtcctcgcctcgcaggggggcacctctagcaacggccggcgcgccgcagatttcagtggacgtccccgccactgagaccagttactacggccttaccttctcggttgtctggcgcccccgccatCtgcgcgtcgcgatcttaacaccggctaagtcctgccaagaggtctaaggcaggcctaagtgggtccgcgggcttcactatagccgttcttcgctgcaggccgtcgtaggggaGccctcggcacCtcccgttgatcTgtgctgtctgacgacgaggcaatggctaacgaccgaactcctctggcaccccaagggtggtgcggcgcgatcaTtcgccatgtaacgcgtcctctccactgtcgcaggcgcgcttgccgaggtccgctgcggCcccAatgcgggcgagactcctgggcagggggccggaaaacatggcgatagcgccgtaaggcaagccgggtcagccaaacagcatagtagcgaacctagatacggtgagggaggggggggccgctcaccaaagcggcgagcggcggtgtggcggcgaccagccctgtttgcctagttttcaacactggcctcctggcggtggcaagacgccgcgcgcagcgtacatgcccaagtcatgcggaacataccgagctcgctcttttccctcagccgccctcggggtaggggccctccttgtacgtgctggcacgatgtcccggtatcgggtcGgcaacctcGctgggagattgacgAagcagatcgaGacgggccattccagctggtacccagccaatgagcctgcggcggggattctgccggtgaggccggAtgctatgtcgtcccggcccctcccacgtattggcccccgcaggcaatagggagtcccccctgccaccctaacatctttctactgcctcggcgacagtcgtCgcgtgagcggtcgcgacgccgtcaccatacagggagcggcttaacgggcacgtacgcgcccgtactacccgcggccgccagccggccacaggaagtgccgaaactccgcggtcctccgaggaacgcggcccgcggccccatggagggAgggggaaggggatgtcggcacGagtgccatggaggtgcgggactttgagtcctgacgcgcggctagctcctgatccgccggctggtcacgtggctgccaggtcacctcagatccggggGgtcctccagcaggcgcccaccccggtctcggagggcctcccgacggggccgcgctccggccgcggtagggtccgggcccccccccttacccgcccgataaggcacgctcccaaattcctggacccgtccgggcattatgcatagtcagcgctacactcccaacggggtgtgcggggcctctccgccgccccagtcgcaggagacgatgcaaaggatctgtcccggtcggccgtcgagcgaaacaaccgggggaatcgaaaagcgacggtcgcgggggcgccgccgaatgccgagcgcgattggcagacgaccggggtgaagttccggggtcgcgcaattactaaccccaagggatccccgggggccgagggccgcacggtggtcccagatttgtagCgttcgAtgcagcgggatacagcgcgggcggaatgcgtagcctgggtTttccccgCaacgggctggggtcgcGAtcgtgaGgcgggggcgccccgctccggaggggagcgtagagagtgaggctaagacctacgaaagagtgcccctggctagaggtaagagccttatgcctcgggtccggcgacgcatggcgtctgctgcacaggcggggcacgtgaaccgactaacagtttcccggctgattgcctcggcccaaacgctcgctcccacggtcggcctagtgaaccccaccctgtccgttcggacaattgcgcggacactgaacagtccagggactcgggccggtccgggtcggcaattggtttcCaagtcggtggcggcctagacctccggacgaccggAaagcgcgtctgctagagggcggggcgcggcggcggaagtgggtgtggcgaggaccacagtccctcaccgtcgaagcttcatcgtgtatgcgcctccgaactAagcgtaaatagcacagtctgtcctgtgagcccgcccggtccgcactcgccccctcgcgacccctctactgctacctctGgctcgaccTctaggccggtctcctagctcccgctcactagtcccggtctgtcgttggggtgggtcggggtgTcctgcgtgctggcgggtcgacccacctgcaggccgtatctgtgtctcgatcgcccgggcataggctggcgcccgagccgctatcacggctccatgccactatatcgggatggcccggggctcactatcattcacagagacccgcggctcaaggtatcgtcgttagtgtgcacgcgtcccgaggccgccggaTgctcagcgtctgagatccgggtcgcggggcctatatcgacgcgctgagagactagcagcgccccatcaacgaggcctgaagctttcgttgtcccacgtacttggcgtttagttattgggctggccccacaatagaagcctcataccgtggctgaacgcccctggtgctcctctccgcgtccatcctctcggggattctaccgcctcgttaccactgactcgacagacatggaacgaaaatggcctcgtatggcaccggtaggggcccgcatatgggcttctccccctgagcgtctgccccccccgcgagcggcctgacggaaaggcagggccatcgggaggcgggagctcggactcccctaggtatggccgagcgacccatgtgtttgcaccgagcaacaacagcgaaccgcgaggcggactcgtgggcgcgggccagccccgtcgccggggctgcagcagctcgggcgcggtagcctgcgctcctcgcgtcgatctacgacggtccgggttgagcgagacccaaaacgtggggtagaagtgtcaatagaagcacaccgtccccccatcgcaggggggttcacgggcctctagtcagaatcagaatgcctctgtgcaatggccggactcggcccgtggagtctcccctggcgcagtcgggaccgcgggtcccattccagctctttcgctaatcgcatgacgggaccgtttagggcggggggaaccgccaacagcgcccactaccagctagggtgagcgaacgaacagccgaggcgccccggctgtgggccgggagcgctagattttaggGccggaggactccgagcggtcggccactgtcatctcgcgacccgtacttgtggtagccttgggccgcccggaacggcctgaacacccgaccagtgtggacgctcgctcctgtcgcctatcccagccccgccgTcccggcccagcgggccacgttagctcccaCGgaccggccctgacaccgcgtcccatggcctgattgaattactcgtgggccgagtcgactgcgacgtgagctcgtaccccccctagttaggataccccggatgttacgcTgatgtgcgccataGtcgcgctatcgcagggtgcaggcagctgagacgtaggccActcccccaagaacggcgcctgCacgCcgGggcggcctcgggctacaccagtatgcctggccTcggctcaggccgcgctgcgacctcgggattcagggtgggcatgtccccgctagaccgggggacgcgtggatctaatgagtactgctcggctgagtcgaggcacaatcgggtacgcctgggcgtcggccaccgaacctctagagctggggtgAgtcctagcccgcggttaggtgcgatgtggtccatcacccccctggctattttatggggctcgcccatgcctcccagccgcgcttccgatgccggcccctccagcaggatggggtacgggtggcttacgcTgCgcgccgcgggtccgggcggtggggccgaGtgcgcgcgggtcccgtggtcccagctcccgggcggatcgtcctcctctctcacaaggcgtcccgagccggtggtcgccacgtgagcgctcTccactggccaaacctagcgtgctgccgtctgcgtcacgggatacaccgatcgaatgtttagacgtgccggcccgcctgttccgcgaggtccgctaaacgggccatgatgcggaggggcggttcggggcgctggccgagccacaaccaccatgcccctcaggccgggcggcgctccggggctcgccggcgggcgtgacgctgaccggaagaggccgaggcagggacaacggtgagagcgtctggagtgcggacggtaccggcatcgtagtaccttgaagcacagcccagatcacgacgcaactaagcggcgtgccgggtacacctgcgtatagtcctccgcacggagctcctggtgacgtggcagagctaagcagtaTcatcagcgtgaagacccggggagatataacccgcggtgagcaggattccaagttagcacagcagcgcgcctacgggtaggatgagatgccccccacGagtttgtcggtcgaggcctcacattcctcaatgggccgCgcggcgaggcggacgctccgtggcgccgtgagggatcaTcaaatCagtcagcccgttatcccctcttcctgtagaggccacgagccatcagagggcagGacgtaattgtgaaactggctgcgggggacagcacaccctaacctcggcgagccaacttcggaactgataggcattgccgtgtagggataaatagggggcgagggagggtccccgcgactaggcaatagcggaccggaccaatccttcgatggtgcggcgtcgcttggaggcctaactgtttGcggcactcaccatcggaagggcgccgtcttcgaagggcacacccccacgtctcgcagcatgcaAcctgttgtgttgaccggaggcgccgcccgtgccCgcgcggaggtgcgcgagcctgttctatagtccaaactggacagcaattcgctgcgtaactttcccagcgcctgcggggacgcggtccttcttgcctgGcgccagctgtaatagggggccgaaaaatcccccaacggttgtgcctggttgaacatccaatgattctagcgcagatatgcaatccctttaaagc
>xcm4381.filtered
cgcaaagcaggtttacgtatagTtagtgggagacgtgtaacaggcctgacacccCtgggagttacaacccacaccggcacaaggcagagggagtCtctgtgtgGgagccggccgtgtcatcccggctacgcgcccgggaagccggtgccgcccgtgGggcaacagggcatgccagcaccatccggaagcgacggtcgtgtcacctggtagtgaaagtgcgtatcaatgtagtccaccctgtccgtgctagggcgcgaccccccccgcgtcgaggcgcagtgcccaacgagtccgctCacccaaagtggcccagaccccgccctcgctgggcgagtggtgcggcgcgggtcagaggggctgacgccgcggtgcgtcagaggcggcactcaccgggctgtggtcgggctacccgtccccgtcgctctcggcgctacaaggggagtacgccccgctcgccgcgcccggcatgaccgcaagccaaatcAgcgcggagtgacattgggcaccccgaggcagccagagcttgtgaccggggcgggccgaacgtggacggggggggaacggggggcaacgtcgaaggaggcgggccacagggggcaagcggggctcccgcccccgtacccacgccagtagggagaattgcgttgcaacgtttcgcccctggtgcgcgcAtctcgactgctgccgtcgtcgtgggcaagagacagtcggcagtcgagggtcgcaccggcggtcttccgctcatggccgcgccctagcgcgcatgaggcgcgcGtgggctaacgtagctcgtcttaaccgggGcctacggtcAgtgagctgtgcgtctggaccgctcggaaacgccggtctctggaggctaccccgggtggccacctgccccgtgggGgcccgcctgcccgaggcccgtccgggcgcccacccgcgcgggcgcacgcgttacggctgacgcccctcgccgtccggcgctgcccgggggcaagcctttggtctcagcccccctcagcacgagcAcgcagccggacaaaaacaactaggccgcagacgcatccgaccggtactcttgagagtgccccccccgcgcctggtcgccactgctccccccgctagcgcctccggaggcttagccttggcggttcgcgcgcctcgaaaagagtgtgtcccgcgtctctgtgcgtgagaaattacgttgcttggtcctcgttactacgtaggcgttgggatgcaaggccctatctccggagcacaaccgcatagcctgaacttcccaccaatacctattccgccgctatacctcccagagccggcccgccctcaccttgagcctgtgctgacgaactcgacccctggtgtccggagccgacagttgatcgttggccaccgagctgttaaccgatgcagcgctccgatgcctggccttctacggccgaccacacaacaaaaaaggggcagctgcggggttgaggggcgggcgccctgccaacgggcccgcggtccgcCtgggctaggagggtgagatccggatctcgccccgcctgttctagcaccgccgtacaccctcggctgcctggcgaccatgtgccccatccggaaggatactccatactcctgccgttaggagaagttcacgcgttccgcgcctccggggcaggcgctcggcaggccatcggaccgcctccccgcacttgggcgcgcctccgccatagggtttcccggcaaatggacagccggcaatcgcttgcagaggcagcaggcaggcacgcggtcggccacccgggccctggaagcccaccgcagcgactcttcgggctacccggggtggtgtcggatgcgtggcgccgtgcgaggggttggtgggtacgtcgacctacactgtcggacttgggtgctgccatcgtagcccgcgtggagctgcgcccctggacgctgtgagtccgCtcgcggtccccgccacccgcccggattaccgcaggtaaaaacgtgcggcgcgcgcccatacgacgggggcgggccactccgccggcacccggaaggctgtgtgacccaacgaagatggaattatgtcgtgttccacccgtggtctgcaacgttcggacgggcccgcccgaggattgttggctccaaggagtcgaactaccgcacacactgctgaacattatgtgcggaggccgcatgacccctcggttcagttgggcCcccgagtggtagaagggggctaatcaaagctggtggcccgaggttgagcctggggaaaaggcacgcgggtacagccccagacacaattggcagaaaagagctcgctcggcgcgtccgctgtacccccgcgccgtttttcccggcgcttcttcgcccccccgtcggccactagaaggccacggtcccggatttgtattcctccctgtgctggcctttggcccctgcgggggcaaggtaccagaccacgcggcgagtataactacagacataccctcgtggccgcgtctcgggccgccccgacctttCGgtgggggccactccgatcgccccaaatgtttgcccgccggccggtaactatcgcgctagagggcgctgtggacactttcccaccaGtgggagtgaTggtcattccCcgcccgAgGttacatgaggccccccgtcaggacgggcgccgcgcgatgggcgtccccacgagcaccagggcgaggtgtaggtggggactcccaggggtgccgcgggccccaaccgaagtagcagggcgcgtgcggggttcacagagcggttgggtggccgctttggcgtacccccgccggtccaccatttagcgcggtcgccgcccgctacggggccggggcacccggtgcctttcctcccgcatcgaactatgttgcgGaggtaactgCctgcgaagggtcatcccctccgcttatgggttgtgccccgggtcgttcacggcggtgtcgcgtggcgcgggctcccagcggaccgccgCcggagcacagttgcccaacgcagccgcgcgcctacttacggggggggccggagacggcttcttctcgcagccggcgctaagtaggtggcggcatcgcgcgcttacacggttgtcttTgccatgaggaggaccggccgcctacgcggctgtttacggtggtggcgggccccccaaggcatgggcgcagctggcgccggccggtgcgacagagtggctgcgaactgtcatgggtaccggggcgtggagcagaagcccgaggcaaacgccagGccgcggccggtGaacccggtacacaccacgctacgaatcgtgatggcggctcgccgggtggatctaccccgcacgccttaggttggagcgggctagccagccgtcgggcggatgccaccgccaaggcggggccccgaccgggtgagcaaccgcacatagcccttcaggacaagcgcctacccccgcccccctacccatcctcgccgatctcgcaccgagttgtgcctaagctagcgaaatcttgaccgggttgtccggccccggcctgagccatgcgaactcggagctcgggaccccacgccctctctcgcAtattttgcctccccccctcggggcggctgtgcccggtgattcaactagtctccgtagacccctggcgtactgcggggcccccccggggggactgttccggacgcgaatcgcttcacgagcctgtgtccgcactgggcgccatccgggccgctgggcggtcgacctgtggtttatggacccctctgatggccgctcccgttacgagaagcagcggccgggtGgcgtgtccagtaataccccatcgcttacgcagcttgCacccgttaggaccaactatacgcgcgggctcaacgcgcccctgaccccgactgcggaacatctgagcgctgaaacgccccgcccgacacgGagcgggctgcgcccagccgacgagacagaatgtcggttttgaaagtgcaggcctggccgtgctcgtcccgcccgcgcccctgcgtgTggaacgctgtgccaacggccagctcccgcgggtggtcctCgccccaaggtgacatggcgctccggcctgccgggtggggcaccgggggaccgcagaagccgcgtggcacgggatttgctcctgccaacttgacacggagggcgccctccgtcgctcggcggggggtttccccgacgccctgcaaccggattgtgacagtaaatttgttcgtttacattcgggaccggagtattgcctgagacggggattgacaaggagacgtttccatacccaatcgccccacggcgggggcaacgaAGctgggccactgtcgccccgcacccgccgttggccgaggggggcggggaccccggaaagccgtctgggcggaccccgggcaccgggggggaacgcGcggcgatcagacggcccggctttcttccgccaattcgagggtttgaaggccgaatgagcctggtcggacccagatggtaagggcgagaggggggaaaccgcgtaggctcgGaccctgccggcttaggaagtggaagcaacgaccgcgccggcgcgtacgcctctacgcgactccggctcacagccgtccgcaagggcccagcgtcatTacCagcgccgtcgggtaaggccagccgtacgccgcaagggGttggcctccctattgcgggcattagtcggcccgtgcttgcgtcccctacgcgaatcagtggaatccacctaaaagtagcctacttcctcCagcgaggtctagccggactgcggaggtcgaatcgtcctaccccgcgaaaccggccgcaacggcagctactctcaagatgcggaggcattggccgggtgcccgggcgtacCgcAtggaggcgacgcaggcggcctctagcggttgcggcccgtcgcgtccaccaccgcgctAaggagccggcgggcgcctagcgccacgaggagggtagcgggcccttgggGttcggcgccggccaccagcgccttagtgtaggccgcggcgcggcctgtccctgcgcgttccccagggcttcccatccccgcgcgtgggtcggggccagggggtgccgttgccgtggtaagtgcggcaccggcattggggcccaatctcgcgacagctctgcgggtagtactccaccctatcgcagccaatttagtccgtcatagtggctatcgtgcgctgcgggcccctggctgccggttagcgccggagggctaccccccggaccggGccgccccccacaacattacgttgcgccggtggcgcggaggcccgccggggggtctggcccgcggtacaaaggatggccacctgcgaaaactgggtcccgattccccccttcttagtgaggctcgtagagcctggtcgcccctggctatgggtcaactcgggggatacctccggcgccggacgctcgccgcgcccccgaagtgccggaggtccgctggccctctagcgggcctagggcctgaatccgggcgccgccgcgaccccgagcacaaccccccagagcatcaacggccgcggttactgctggggacgcgattcacccaggagaagaccgtcccgcagctacgtgatcctaagctgagaagcctcgtgccccggccccAgtcccggtcgcgtcaggataccgcgctgactgccgaaatctagacgcggagcctcaggAtcttgacgaccgcgggggttaccccttggccgcgccacattctgtgtcgaaacgtcgtgacgtcttcgtggggcggggggggggcagcgagagcgggagagcctagagtacggacagcgccggggggagggcggagggcgcaatggtttcaaaatcatcttccgagtgaaaggctatccgagatgcacacgggaccgcaacgcccacctagagctcctcgcCgcgcgcgcttggccactataacgcatgcggcGacgagaccccttaccctgggaacacttgggggggggaggctggcgtcagttccgaacctagcgggcctttcctggccggacgggggccctgcctccctgtcgaggacgagccgtctagcggccgcgacgcttgaggtccccagatacatgcgatgacctaacccaagaagGtgaatcaCacggacggcgtggcagtcgaacctaagcttgaagcccccttctccctcagaactgttcgggtcgcggcagcccgctagtacGtgcgcccttctggctgcccccaaccgggcccgcgccatcgccgctcctccgccggacagtggtcgccacatactcaggagcgcccggggggccgcccgtggaccggctcgtcagcctctgatctggcccccattggtaggccgtaccccggattaaccgcgcaccggtccccgaggaccgaagccaccctcccgggcacccgcgtctggtacccggccccgcggtgtatacacggctcgAactcacttaacgCccggcaggcgaaggtaagcgggcccggatccgaccggcggtgcacttctcggggcttcgtgacggcttacgcgcagcgggagcgaaccgatccgcctccgtcgcgtagtcgtcgtctcgcgcgccccgccccctgcctgctccggggcaatttcggggaggggcgagcccgtcttagtgagccccagggtgtgggcgcgaaaggaagccatacCttctgagttccgcgcgggcccaAatgtctctgtcccgggggcaactccgtgctcgcggcggcaggcgggccagttccagctctagcagctcactcgattgcaaaatccggccccctcAgcgtctatgagctacagtaggcccatgcgtcgtgttcaggcgcgccgcagtcgatcgcctccccggcgcaagggaaacctaatgtcgggtgccctgtccaactgacacggcgcccccctcaggcaccgtgtcaaaccgcagccatacggccccgcccgtacctaaggtaatcagcggaggctgccttccgcgtccagggttctagggtcgtcgcaacacgctcctgaccggccgtggggcaactcggccgagtgccctagtcggatggccgccctcagcgtagttctgggttcgtctgaacatattccaggccgctatgcggaaggaagggtagcgtagaccaagtaagcctggcgcggtgacccaatttcctgtcccagacgcgggtgttcgacgtcgagacttcaccaatggtcatcggctgcactcgaacattgagtatgggccgaacagcGgaacgccatatgtaacgcgctagtgacggtgcgcgctgcagaggccaCcaggcggttcggaatgtcccgctgggcccctcgcctgcaggggcgcacgacgtatctagagcgcacagctgttaggagcacagactccacgtgtcccgcgctaacgcgctccccccgatgcggcgagatgacagcggtcgtttggtctcgccactcgCgtggaaggcccgccatccaacgttatcgcctgggggcggcattttggtaccttcggtcacgctcgcctgtggggccgccctgaagcggaaactgtggggcgggttgggggggtcgaggggatcttggccggccatggcgctcggtccgccgccagtgccagggcgcggcacagccccgcgtaccgggggggtggcccgccgcggttccggccctggctcgcgccccgccccgcccccggggcctctaccctagcctcgtcttgttcaccggtgggcgtttccctgatatcatcgtcgccacagcccgtctggggtgaaagtacggtaggacccgtggaagcctgccgagcacgcggttcacggcgcgcggaggagcactccctgggcgggccaactcacgcttcgcaggttgccttgggtggccccgcctcttttgggcaagccaaccgatggcggtcgggattgccatcgcagcacgggcgcccaaagcccgtgcggccgccccagtgaactgccctctcccccggaagcgcccagtgcgcgaaccggaggcggggagcaggctcccggggcccCgcagcggtagcgacaggtggttaccacgccgcacaccgatggctccccatcgccgtggtccgaggcagccggctggcctcgggagcgcctcggttaaacgccctcccgccgctccgtcgcttgcgtcccccccccccagcccaattagaggggaccgtgggggcgggctgtcgctcagggaccccggcacgtcggccagcacgcgacgcccagcagccggggggacgtgcctgtcctcccgggccagttttccaactgtttggcctctgaagaagctaccgctccgCgccggcgtcgtcaaactgctcacctccaacccagttgagtctgtgcagcgccggcttcagcccccgcgcgccggggccagccgttcgtgcgctctgcgtggccgtctaagtcgcgaggcacagagggaagtgcggcgacccgtgccgtttcctttggggatcgtgtgctatcagcgttcccgcatgtcgatggagaggcGacgaagggcattgtgcgccgcctaacgcctctggcccatgtaggggtacacgggaccgcgcgcagaaagtatagttttgtacgcccgccttgtggagcaacacaaggcgagaaaggacacgccacccgaccccgtggcgtttgtcggtcagatgccggccgccctccatcgttctgattgctcgtagggtggccgcccgttcatacCaccccgataggccgtaccttttaccggcaccctcctcctctcctcgatcgtcaagacgcggctcaCagcagcgtggactacctcgtcgtcacgcccacgacgggcccgcgagggcgcgcgcggatccaaggacccgacgaggtggaagcactccggaagccggtacaccaccgcagggccgagagtccatcagagatGggaccaaatcgcttggcggccgggatcaatcgtcgtgggggaacaaGCAgggctttacggtaagacccccagtcaccgggtgcagtgaaactacgaaggggggcgcctagtcgcaGgaggggatgcgatcggtgaccagcgagagagtggctcgTggggacttctcggtcgaagttgtgccttccgcccacgtccacactgccgtggacgacaccgagtcgtagtggggaccgcacccccacgcggcgtcgacgtacgctccgggccgccttcaccgttcgctgcgggatacccGcgagatgcactcCcgaggttcggagttgagccatcggactcccgaggcgtgcagccttggagggcattcgtagaaactgcggcgggttgctcctggcgtcacgcgcggaggccgCcgcaagaggttgtcccactaggggacggcgtggagctgggcggacggcttcggtagaagcaccgtggttgacaatacactgggccagcgctctagaAcataggcactaggcgagagggccgcatcgcattagcgttagagccctaatacagcgactcaaccctgctgcgcccgtgggtggataggacgcccacacccgccgccgtacgcacggcgtcacgacctattgctcgaccatcgcgctgtgctcgacagggtcgcgcggctcccgcgcaggcggtcaattttagacactgtacgcccgacaacctttaggccccccgctcccggctggaggggggagatggtcgccggcagcattacttagaccgagtccaacgttgtcgctcggtggaggcagggcgttcgcccacgcctccggctgccccgcttcccaggtccggggggtcgtcgctctggaaccgtaggccggttctggtatagcctgctccccgtctccccgatgccgcaccaccttgacgggtcaagcggtgcccccccaccgcgggcgggcccagcttattcggccgccctgagtgtgcctcccctttactgtgtaccgGaccggcccgcccatcgggaaccaaccggcgcccgttcagtgctggcgggaggccccccccacccctccagggggtcggcggtaacgacaatgggacccaggcgaccgtccagtccgccagCcacccggggcgacgaccccggccctTatgtccggccccgtattCgctacacgccggccaaaagcaacatacggattCtgggcatcatatttgtatcacccacaggccgtcctccgttgccacgggacgcgtggatctcgttgggatcggttcgaaccgggcccccttctgaaacgcaccgtagccggcctgcgcaacgacgccacggggcggtcgccagtcgcttgtccccgggggcggtcggcgggctggtatggtaaactctatcgtcccttGagggaacagattcgctGtggggcatatcagcccaggggtatgggcgcctgtttcccctcctgatctcaccccgattgcggtagcgcgcgcgcaaaggtgccacgagcttcgcggcgccactctccccccgcgccggacgaggtcgcccacaggtgctgctctaggtggatgattgtcccgggcccaggccgcggcgccatcatttgccgttctctatcctcgccccgtcctgtatgcaaccgtcccggaccttgcggggggtcacgttacccgttggtcaacggacgtcattctcttctagctttagggacagatagtgcGgggttcgagccggagcgcgcgggatgcatggccgcccttcgggtggcctcagcccccccgcgtgggtgcgctggcaaccccaagcaaacccggccgcgagaacggcatcggcgcggcgttgcgtcgccttctacgcaactcgcagaggcgggatAaatgccgctgaggcgctcgcagggacccctgcacccgacttcaaacgcctgacgatgccgccccaccacccgtgaccaaacctgcacgagccccgacggctaaaAtctcacggtacaggatggttagtcctcaggagttgcatgcgcatcggcttgcaGtggtgatcccgtcgccttcaaggccccgcagttggctggggcctcgcggcagccggctacaaccccggcacggcttggcgcgggtgcccacggccagttagaggttccccgtggcacgggatcggcgggggtccggggtcgcaggggccccagtcgcagcgcctgcaacggcccactgacgcgcagcccggtcgcgcggcgGgccgagtctaGttcgagcggcgggatggcgttacggacgggcgtcgccataccatcctgcggtgggaaaggtgccgccgggtgccgttctagccggaccggaggaaggccgccgggccccgacttaccggttgggggcactgtCcggggaacgctccacccatcatcaccaagttAattcctcggatcctcctgcggacggccgggccgcCaacgcgcccgaagtcgtccgccaacgagacgggtcgcggctatggaccggtctattgtgatccggtgattgaagaatcacaagagcggtaacgaacgcgaagcgggtttatcgcgcctcctctgctgcccccggacagttCgcctagccccggcccagccagccagttgaccgcAacgatgagctataagctcacggcggccctgacgacgagtcaatacggggtgttcggcgacccttgctcagcgtccCttgggcggccTagtaccagaactcttagcgcaacgcacacctcaacgccagggtgagggaaaagaccagagcacctcgcccgcgcagggtgcccgccgcggcactacggacagggggtgagctcaagaagtggctgtaggtgcggggcaggcgcgcggcactcccgagggatgctccgtgcgggggcagccgcggacggcttctgggtttcaaacatccaggcTtccgcttcaacccccacggccccgccagtcatagtcctcggggggggtagggcgctGGGGCttttgtgtcccgcggcaggtagagattcCccaccctaaagaggctctcgcccgccgatgcccgcagggagacaggcggcacaaaagtcatgtggcaagcgccGagggttgggccccttggagggcctgcgggcggggattgagcggcagatgacagatggccgattgatggggcgccgcggccagaaagggcgcgtaggggacgctgcgcgtcacccccgaaacgagatcagcgctgggcggcgcggttgccccggatcggggtggtcccttgggcttggcccagccggcagcggcgggcagggccacCcaggtacgggcactacagacgtaccctgcgatcccctcctccggtttcccccttcccatgacgcgatctgcgtcctgtctgcgccggcgcggggaggggtgtctcaccggagacccatggttcccccgctgtctcatggctatcgcaacgtcaaagtggcacCgctaatgagtagggaccgaggccccggcgagacaagcgggctggaagtcgatcgctgtaggcgtcgcgaggcccaggacccacatagggggggacAagctctgcgagtagcttcaggggggccAcagaggaggccttcaccgacggcggcgcggtcgggacatgaggtagaaagccacagggagactccgcaccggagggagtgcgggctggggtcgaaaggagcgggcgaggcacgaggggcctacccaaggggcgtgcgtttgcggtaacctaaaggcccgctacctggacggggtggagcggcgcggcggccccatacgtccgggtcgcggagagggagaaggcgaccgtaggcgttgtcccgcgacacgcctcaccgatccgaacgccccgggagagccgggttggacgcgttccccgtagcggccccgcgcgaggccgcccggtgaggggcgggacgcaacgactccggccgcgacccgggctgcaccttccgccgggcccctgccgaggtgggacgtgggtcttcgaagtgtacctgaaaTatcgcgagcggggcgctaggctgcggatccctccctcgcgatacccggccaagccccgtgcccgggtgggggtgggttatctgcgcggtgtctgcccgcccaggcgcgccgcgttaacgaacgggaggaccagcgcggaatcgtcgtttccgagcccgcacgcccagggagtgaccggcactgcggggggccgctggcgctcattcggccgatgcggcCcggcgcatagctccctgctatctactagtgatgtatggcccgccccggggggaggcgcggtgggtctccgacgccgctttgccgccggataggggaaggaagacgccctgagaataactcaccgcaccccctccgggcggtcgagcgtgacgcgtgccagtcGcccgcacaggcagggcacggtcagaccaggttccgtggggaggggtcgggggtagaggccgatgcacgggGcgaccgcgtgaggttggaccgagtgaggttgagtcgtcgcgcgctcccggacgggcggcgcgcgccagtgctcgagtctagcctgtggggtactctgcgcagggttaattgcgctggcagcccagtcagttcgccttgagttatctgtcccctttcgcgatctcatgcggtgggcaattcgtctacggcccttcccaggctactgcacggcccatgctcgtttaggatctCcagccgcgccgggccgggagggtatgagccctggtgatgccgacatcccccgagatgctcatcccctcgtggcgccctggcaggtggacttgggatggccccatacgtacggacgactggctgctgcgggacatggtgccaatgggaccgctagtccggggggtatccccaatgccccGGgcacgcactttcgggcggtggcggttcgcgtgagcggggaaacgcaccagggaagctgtacccggggccggagtcgagcgaagccgctggccaagactgattGctccggcggtaacgcaacccctggttatctaCtcacggtgtgacccgagccgacccccaatTtctaacccgataatgcggtaggacgtttccggtaagggccgctttacggagggttaggcttctcaccccgccgcattcccgataggggccccaggcccaaccgaccggcgccctcccgccCGcatcacaggggcagggggctggaacccctcggcgccccacggcgcccacaggcgtgtcagcatccgccctgaggcaaggcttcttgtgccagcgcaggcgtccacctacacgaaaggaggtctaatggtaggtccccgaatggtgagcgctggcggggctggggagtctcggcagcgcccgccccaccgcgcaggcgcgcttaccctccctggtagccCgatctgtccctgcacccagggtggtagcggctcacctcgcagggcccgggctatgcctcaccgaacggtcccgaagcctatcttccccgttgtggtgccgcctcgatcctcgaaccgcgtttagctctggacgctctgaggatcgaggcggcgcgtttaagaaaaacacctcgtgtacaatgtgtccccgccgcagagctatggaaacacgtggacagtccgagagttgcgggtctagcaggaggggcgccagcaggactgccacacagtcgcgatgtagtcagggaacagGcGccAtctcaCtgtgaccCaccgattgctcagcagcgctggaggcgccgccgccgcccacccggcccccccggaaccgggctcgacgaccattcttcgtgtgccgaccggtcgcttaccacgcgttTgtacacggtcactcctAttCcgctacacgaaaaatctagcaccaagctgggacgggCcgtgggggctggcccagctgtcccctcggttgttgCgaacgagtccgcggacgtctcggctagctcttcgcgttcgtctactatacatcacaagacaccatggcccttcgagagtcctgagggtgacgagcgcggccggcgcgtcccgtcccaacctgagtggagccccgtagagggTgacgggctggcacccaccccaaacgttcgtcctggcctgtagcccaagggttgatgagagggctctggcggcaggcggttgatcgcgtggctgcgcgtacgactctcttctacgctccaaagcAacattctgacagaggcctcggtgcagccgtcggctccgtaggaactcacccgtctcccgtgtccctgtgcgtcgctaagagagcccttttgctggccgctttgcctcgcctacaggcaggtggcggccgggggtgggacagggtccgccggaccccggtcccagtaggcctgaggtgggactcacctcgacccattcggtcatggaaggacgctccgtttcactttactatcaagggcggatcgctaggctccggagagcctcgcgggggggcgtaggggcggggtccgaGtgggtcgatgagtgagcagccAccctctcgcgcgcttgggaggccgtgtctcatagggGggccaccatgagctcacgtgcaccccctgtctcgctttgcatccctggtacagccgcacttgggctcggcgaagcagtaccggtcgtaatgggctagctgacagtgaacgcctccctagtgccgcacaatagtTataacctcaacccgcaaCttgagagcgtgtaccagctcacgatgagtgaggacctgcaggtatagtctgacagtcgggtggactcgcggacggcggcattgtggcCgacctgatgctcccgcgtgctggcccagcgtgcactgccccggcggacctccgaccgcaccagtagagttcgggctaagcccccaatccttccactgtctgcaagacgcgcgcgcttggcgatacccggggggggagcgcaacggtccaagggcggcgggctgctgggccggcggcgcggcggggcacacgggggggcggctgagaccgtttcgtggctggccaggctgcagctcccaaagggcgtcagggggcatccccgggcgggagaggccgcgacttctgatagtgggtgccctatgctggtgaactatggccgttgctctgtcccagggcccaggatggcgggaggtacatgtgcagcaagcacgccggaccacgtcaggcgagagaggcgtagggaaacggcggggaggacgttttcgaggggggggccggtgctcgccacggggggctgaacaccagtgaaagtgcAatcccggCgctgaccctctcgccgccgatgccgccaaaccccaaagattaGcctccctaaatcatcgtgggcacgcggtcgagcaaaggggcgggcttgtagctagactccagcctcgttcgcgtctcgttctcccttcgagggccttgccagggtccGccagaatcatctcctggctcctttgtagacggcgcttattgttcgcccggagttggcggaggacgggcaagtggcgtggccccctactagtcactgtgtagttcgccttacccactccgtcgctaacgccgctgggcgagtcggatgctgtggaggcagcaatacgggtctaaggcccactacacgaacccggaacggcacaggattgtgcgagatcgggccagccgccattcagccctatacaataatacccccgagggggggggggccgctaagaataggcgccaccgcggctcttggccgcacgcccgtccaatgtgTttacgtgttgcccgacccgtcccggttcttagtgaggcagccggacgaggtagacctcgagcgcgtgggcagggcgaaaatcggcataccatgggggaaacgaccagcagctgttgcccgaggggaggacatcaacgtagccggaatgccggggaggccgcgacgggcagaccgatgcccagcgcgtgaccaacacaatcttcggagagtctccagacccgctgattccgaaaccctcccCaatagccctcacgcagagttcatgctgagcgggctcgcctcaacagcacgtgggaacacgccgggcctagccgaacttgtatcgtggggccacgccgtcctaagcgccggcattcgctctcttttagcatcggagcctctacggcgcctcgtgctgcggcgtcgaccgctctgtttagtccgcacggggggatgcggcagcgcggtaagctccgttgcccgtgggcgctgttcagatacaactggcactttgacccgcggtcatgAtttggGGctgaggtcagcctcctcTagggcgccccggcgataaagatcccactagaacttgctgctagtattgttccctgctgggccaaaggcagcctccagagcacacatgcgactgtgaaaggtgagcggcgctgccgaggctgcccctcTacccggatgaagtcaaagcccgagcggggcggcccagcggtgcacgccggagcgctgagGatatatgcGgccacgtgccgcacatgtcgctccgggcccggttgctcctcttcaagcgtCgcgctaccggccgggaccgggcggaacgatacctcccattagcggcccagCggcgggagccgcggtcggaacgccgCagtgatctAggtccgccacgttcgggcagctcgaaacctcttactttacaactccggaggcgtagcgattcaagggacCtctctagcgcgcctgcgcctttcccactatacgtggcagtcagcgggcaggcccgcttggctAcatgcgactccgttgaaacaccctcgtcagtccacgtcgggggccgacaacgccgctaaactcacagcctccctgaggctgctatgcacacttacctcgcaccgtctcgacgcctagattgTacccaacctggtacacctcggcccgtCctacgggcgcCggccgttggggggcccccccagCtcagtgccagcttcaggttccacgcagactttagcacccggatctgggagatggaagagtccacacgttacacatgaataaccctgatttgcgggtgttgtccaacgcgtccggcacattccgagccgccgcgcttcgcgggcctacggctcaaaactggaccgtgcgtggggagagccgtacccgccgcgtgcgcaccggggccgGtcaacgttcggggcgggggtgaGctagtgggtgaagagtcctcgcctcgcaggggggcacctctagcaacggccggcgcgccgcagatttcagtggacgtccccgccactgagaccagttactacggccttaccttctcggttgtctggcgcccccgccatCtgcgcgtcgcgatcttaacaccggctaagtcctgccaagaggtctaaggcaggcctaagtgggtccgcgggcttcactatagccgttcttcgctgcaggccgtcgtaggggaGccctcggcacCtcccgttgatcTgtgctgtctgacgacgaggcaatggctaacgaccgaactcctctggcaccccaagggtggtgcggcgcgatcaTtcgccatgtaacgcgtcctctccactgtcgcaggcgcgcttgccgaggtccgctgcggCcccAatgcgggcgagactcctgggcagggggccggaaaacatggcgatagcgccgtaaggcaagccgggtcagccaaacagcatagtagcgaacctagatacggtgagggaggggggggccgctcaccaaagcggcgagcggcggtgtggcggcgaccagccctgtttgcctagttttcaacactggcctcctggcggtggcaagacgccgcgcgcagcgtacatgcccaagtcatgcggaacataccgagctcgctcttttccctcagccgccctcggggtaggggccctccttgtacgtgctggcacgatgtcccggtatcgggtcGgcaacctcGctgggagattgacgAagcagatcgaGacgggccattccagctggtacccagccaatgagcctgcggcggggattctgccggtgaggccggAtgctatgtcgtcccggcccctcccacgtattggcccccgcaggcaatagggagtcccccctgccaccctaacatctttctactgcctcggcgacagtcgtCgcgtgagcggtcgcgacgccgtcaccatacagggagcggcttaacgggcacgtacgcgcccgtactacccgcggccgccagccggccacaggaagtgccgaaactccgcggtcctccgaggaacgcggcccgcggccccatggagggAgggggaaggggatgtcggcacGagtgccatggaggtgcgggactttgagtcctgacgcgcggctagctcctgatccgccggctggtcacgtggctgccaggtcacctcagatccggggGgtcctccagcaggcgcccaccccggtctcggagggcctcccgacggggccgcgctccggccgcggtagggtccgggcccccccccttacccgcccgataaggcacgctcccaaattcctggacccgtccgggcattatgcatagtcagcgctacactcccaacggggtgtgcggggcctctccgccgccccagtcgcaggagacgatgcaaaggatctgtcccggtcggccgtcgagcgaaacaaccgggggaatcgaaaagcgacggtcgcgggggcgccgccgaatgccgagcgcgattggcagacgaccggggtgaagttccggggtcgcgcaattactaaccccaagggatccccgggggccgagggccgcacggtggtcccagatttgtagCgttcgAtgcagcgggatacagcgcgggcggaatgcgtagcctgggtTttccccgCaacgggctggggtcgcGgtcgtgaGgcgggggcgccccgctccggaggggagcgtagagagtgaggctaagacctacgaaagagtgcccctggctagaggtaagagccttatgcctcgggtccggcgacgcatggcgtctgctgcacaggcggggcacgtgaaccgactaacagtttcccggctgattgcctcggcccaaacgctcgctcccacggtcggcctagtgaaccccaccctgtccgttcggacaattgcgcggacactgaacagtccagggactcgggccggtccgggtcggcaattggtttcCaagtcggtggcggcctagacctccggacgaccggAaagcgcgtctgctagagggcggggcgcggcggcggaagtgggtgtggcgaggaccacagtccctcaccgtcgaagcttcatcgtgtatgcgcctccgaactAagcgtaaatagcacagtctgtcctgtgagcccgcccggtccgcactcgccccctcgcgacccctctactgctacctctGgctcgaccTctaggccggtctcctagctcccgctcactagtcccggtctgtcgttggggtgggtcggggtgTcctgcgtgctggcgggtcgacccacctgcaggccgtatctgtgtctcgatcgcccgggcataggctggcgcccgagccgctatcacggctccatgccactatatcgggatggcccggggctcactatcattcacagagacccgcggctcaaggtatcgtcgttagtgtgcacgcgtcccgaggccgccggaTgctcagcgtctgagatccgggtcgcggggcctatatcgacgcgctgagagactagcagcgccccatcaacgaggcctgaagctttcgttgtcccacgtacttggcgtttagttattgggctggccccacaatagaagcctcataccgtggctgaacgcccctggtgctcctctccgcgtccatcctctcggggattctaccgcctcgttaccactgactcgacagacatggaacgaaaatggcctcgtatggcaccggtaggggcccgcatatgggcttctccccctgagcgtctgccccccccgcgagcggcctgacggaaaggcagggccatcgggaggcgggagctcggactcccctaggtatggccgagcgacccatgtgtttgcaccgagcaacaacagcgaaccgcgaggcggactcgtgggcgcgggccagccccgtcgccggggctgcagcagctcgggcgcggtagcctgcgctcctcgcgtcgatctacgacggtccgggttgagcgagacccaaaacgtggggtagaagtgtcaatagaagcacaccgtccccccatcgcaggggggttcacgggcctctagtcagaatcagaatgcctctgtgcaatggccggactcggcccgtggagtctcccctggcgcagtcgggaccgcgggtcccattccagctctttcgctaatcgcatgacgggaccgtttagggcggggggaaccgccaacagcgcccactaccagctagggtgagcgaacgaacagccgaggcgccccggctgtgggccgggagcgctagattttaggGccggaggactccgagcggtcggccactgtcatctcgcgacccgtacttgtggtagccttgggccgcccggaacggcctgaacacccgaccagtgtggacgctcgctcctgtcgcctatcccagccccgccgTcccggcccagcgggccacgttagctcccaCGgaccggccctgacaccgcgtcccatggcctgattgaattactcgtgggccgagtcgactgcgacgtgagctcgtaccccccctagttaggataccccggatgttacgcTgatgtgcgccataGtcgcgctatcgcagggtgcaggcagctgagacgtaggccActcccccaagaacggcgcctgCacgCcgGggcggcctcgggctacaccagtatgcctggccTcggctcaggccgcgctgcgacctcgggattcagggtgggcatgtccccgctagaccgggggacgcgtggatctaatgagtactgctcggctgagtcgaggcacaatcgggtacgcctgggcgtcggccaccgaacctctagagctggggtgAgtcctagcccgcggttaggtgcgatgtggtccatcacccccctggctattttatggggctcgcccatgcctcccagccgcgcttccgatgccggcccctccagcaggatggggtacgggtggcttacgcTgCgcgccgcgggtccgggcggtggggccgaGtgcgcgcgggtcccgtggtcccagctcccgggcggatcgtcctcctctctcacaaggcgtcccgagccggtggtcgccacgtgagcgctcTccactggccaaacctagcgtgctgccgtctgcgtcacgggatacaccgatcgaatgtttagacgtgccggcccgcctgttccgcgaggtccgctaaacgggccatgatgcggaggggcggttcggggcgctggccgagccacaaccaccatgcccctcaggccgggcggcgctccggggctcgccggcgggcgtgacgctgaccggaagaggccgaggcagggacaacggtgagagcgtctggagtgcggacggtaccggcatcgtagtaccttgaagcacagcccagatcacgacgcaactaagcggcgtgccgggtacacctgcgtatagtcctccgcacggagctcctggtgacgtggcagagctaagcagtaTcatcagcgtgaagacccggggagatataacccgcggtgagcaggattccaagttagcacagcagcgcgcctacgggtaggatgagatgccccccacGagtttgtcggtcgaggcctcacattcctcaatgggccgCgcggcgaggcggacgctccgtggcgccgtgagggatcaTcaaatCagtcagcccgttatcccctcttcctgtagaggccacgagccatcagagggcagGacgtaattgtgaaactggctgcgggggacagcacaccctaacctcggcgagccaacttcggaactgataggcattgccgtgtagggataaatagggggcgagggagggtccccgcgactaggcaatagcggaccggaccaatccttcgatggtgcggcgtcgcttggaggcctaactgtttGcggcactcaccatcggaagggcgccgtcttcgaagggcacacccccacgtctcgcagcatgcaAcctgttgtgttgaccggaggcgccgcccgtgccCgcgcggaggtgcgcgagcctgttctatagtccaaactggacagcaattcgctgcgtaactttcccagcgcctgcggggacgcggtccttcttgcctgGcgccagctgtaatagggggccgaaaaatcccccaacggttgtgcctggttgaacatccaatgattctagcgcagatatgcaatccctttaaagc
>xcm4384.filtered
cgcaaagcaggtttacgtatagTtagtgggagacgtgtaacaggcctgacacccCtgggagttacaacccacaccggcacaaggcagagggagtCtctgtgtgGgagccggccgtgtcatcccggctacgcgcccgggaagccggtgccgcccgtgGggcaacagggcatgccagcaccatccggaagcgacggtcgtgtcacctggtagtgaaagtgcgtatcaatgtagtccaccctgtccgtgctagggcgcgaccccccccgcgtcgaggcgcagtgcccaacgagtccgctCacccaaagtggcccagaccccgccctcgctgggcgagtggtgcggcgcgggtcagaggggctgacgccgcggtgcgtcagaggcggcactcaccgggctgtggtcgggctacccgtccccgtcgctctcggcgctacaaggggagtacgccccgctcgccgcgcccggcatgaccgcaagccaaatcAgcgcggagtgacattgggcaccccgaggcagccagagcttgtgaccggggcgggccgaacgtggacggggggggaacggggggcaacgtcgaaggaggcgggccacagggggcaagcggggctcccgcccccgtacccacgccagtagggagaattgcgttgcaacgtttcgcccctggtgcgcgcAtctcgactgctgccgtcgtcgtgggcaagagacagtcggcagtcgagggtcgcaccggcggtcttccgctcatggccgcgccctagcgcgcatgaggcgcgcGtgggctaacgtagctcgtcttaaccgggGcctacggtcAgtgagctgtgcgtctggaccgctcggaaacgccggtctctggaggctaccccgggtggccacctgccccgtgggGgcccgcctgcccgaggcccgtccgggcgcccacccgcgcgggcgcacgcgttacggctgacgcccctcgccgtccggcgctgcccgggggcaagcctttggtctcagcccccctcagcacgagcAcgcagccggacaaaaacaactaggccgcagacgcatccgaccggtactcttgagagtgccccccccgcgcctggtcgccactgctccccccgctagcgcctccggaggcttagccttggcggttcgcgcgcctcgaaaagagtgtgtcccgcgtctctgtgcgtgagaaattacgttgcttggtcctcgttactacgtaggcgttgggatgcaaggccctatctccggagcacaaccgcatagcctgaacttcccaccaatacctattccgccgctatacctcccagagccggcccgccctcaccttgagcctgtgctgacgaactcgacccctggtgtccggagccgacagttgatcgttggccaccgagctgttaaccgatgcagcgctccgatgcctggccttctacggccgaccacacaacaaaaaaggggcagctgcggggttgaggggcgggcgccctgccaacgggcccgcggtccgcCtgggctaggagggtgagatccggatctcgccccgcctgttctagcaccgccgtacaccctcggctgcctggcgaccatgtgccccatccggaaggatactccatactcctgccgttaggagaagttcacgcgttccgcgcctccggggcaggcgctcggcaggccatcggaccgcctccccgcacttgggcgcgcctccgccatagggtttcccggcaaatggacagccggcaatcgcttgcagaggcagcaggcaggcacgcggtcggccacccgggccctggaagcccaccgcagcgactcttcgggctacccggggtggtgtcggatgcgtggcgccgtgcgaggggttggtgggtacgtcgacctacactgtcggacttgggtgctgccatcgtagcccgcgtggagctgcgcccctggacgctgtgagtccgCtcgcggtccccgccacccgcccggattaccgcaggtaaaaacgtgcggcgcgcgcccatacgacgggggcgggccactccgccggcacccggaaggctgtgtgacccaacgaagatggaattatgtcgtgttccacccgtggtctgcaacgttcggacgggcccgcccgaggattgttggctccaaggagtcgaactaccgcacacactgctgaacattatgtgcggaggccgcatgacccctcggttcagttgggcCcccgagtggtagaagggggctaatcaaagctggtggcccgaggttgagcctggggaaaaggcacgcgggtacagccccagacacaattggcagaaaagagctcgctcggcgcgtccgctgtacccccgcgccgtttttcccggcgcttcttcgcccccccgtcggccactagaaggccacggtcccggatttgtattcctccctgtgctggcctttggcccctgcgggggcaaggtaccagaccacgcggcgagtataactacagacataccctcgtggccgcgtctcgggccgccccgacctttCGgtgggggccactccgatcgccccaaatgtttgcccgccggccggtaactatcgcgctagagggcgctgtggacactttcccaccaGtgggagtgaTggtcattccCcgcccgAgGttacatgaggccccccgtcaggacgggcgccgcgcgatgggcgtccccacgagcaccagggcgaggtgtaggtggggactcccaggggtgccgcgggccccaaccgaagtagcagggcgcgtgcggggttcacagagcggttgggtggccgctttggcgtacccccgccggtccaccatttagcgcggtcgccgcccgctacggggccggggcacccggtgcctttcctcccgcatcgaactatgttgcgGaggtaactgCctgcgaagggtcatcccctccgcttatgggttgtgccccgggtcgttcacggcggtgtcgcgtggcgcgggctcccagcggaccgccgCcggagcacagttgcccaacgcagccgcgcgcctacttacggggggggccggagacggcttcttctcgcagccggcgctaagtaggtggcggcatcgcgcgcttacacggttgtcttTgccatgaggaggaccggccgcctacgcggctgtttacggtggtggcgggccccccaaggcatgggcgcagctggcgccggccggtgcgacagagtggctgcgaactgtcatgggtaccggggcgtggagcagaagcccgaggcaaacgccagGccgcggccggtGaacccggtacacaccacgctacgaatcgtgatggcggctcgccgggtggatctaccccgcacgccttaggttggagcgggctagccagccgtcgggcggatgccaccgccaaggcggggccccgaccgggtgagcaaccgcacatagcccttcaggacaagcgcctacccccgcccccctacccatcctcgccgatctcgcaccgagttgtgcctaagctagcgaaatcttgaccgggttgtccggccccggcctgagccatgcgaactcggagctcgggaccccacgccctctctcgcAtattttgcctccccccctcggggcggctgtgcccggtgattcaactagtctccgtagacccctggcgtactgcggggcccccccggggggactgttccggacgcgaatcgcttcacgagcctgtgtccgcactgggcgccatccgggccgctgggcggtcgacctgtggtttatggacccctctgatggccgctcccgttacgagaagcagcggccgggtGgcgtgtccagtaataccccatcgcttacgcagcttgCacccgttaggaccaactatacgcgcgggctcaacgcgcccctgaccccgactgcggaacatctgagcgctgaaacgccccgcccgacacgGagcgggctgcgcccagccgacgagacagaatgtcggttttgaaagtgcaggcctggccgtgctcgtcccgccTgcgcccctgcgtgTggaacgctgtgccaacggccagctcccgcgggtggtcctCgccccaaggtgacatggcgctccggcctgccgggtggggcaccgggggaccgcagaagccgcgtggcacgggatttgctcctgccaacttgacacggagggcgccctccgtcgctcggcggggggtttccccgacgccctgcaaccggattgtgacagtaaatttgttcgtttacattcgggaccggagtattgcctgagacggggattgacaaggagacgtttccatacccaatcgccccacggcgggggcaacgaAGctgggccactgtcgccccgcacccgccgttggccgaggggggcggggaccccggaaagccgtctgggcggaccccgggcaccgggggggaacgcGcggcgatcagacggcccggctttcttccgccaattcgagggtttgaaggccgaatgagcctggtcggacccagatggtaagggcgagaggggggaaaccgcgtaggctcgGaccctgccggcttaggaagtggaagcaacgaccgcgccggcgcgtacgcctctacgcgactccggctcacagccgtccgcaagggcccagcgtcatTacCagcgccgtcgggtaaggccagccgtacgccgcaagggGttggcctccctattgcgggcattagtcggcccgtgcttgcgtcccctacgcgaatcagtggaatccacctaaaagtagcctacttcctcCagcgaggtctagccggactgcggaggtcgaatcgtcctaccccgcgaaaccggccgcaacggcagctactctcaagatgcggaggcattggccgggtgcccgggcgtacCgcAtggaggcgacgcaggcggcctctagcggttgcggcccgtcgcgtccaccaccgcgctAaggagccggcgggcgcctagcgccacgaggagggtagcgggcccttgggGttcggcgccggccaccagcgccttagtgtaggccgcggcgcggcctgtccctgcgcgttccccagggcttcccatccccgcgcgtgggtcggggccagggggtgccgttgccgtggtaagtgcggcaccggcattggggcccaatctcgcgacagctctgcgggtagtactccaccctatcgcagccaatttagtccgtcatagtggctatcgtgcgctgcgggcccctggctgccggttagcgccggagggctaccccccggaccggGccgccccccacaacattacgttgcgccggtggcgcggaggcccgccggggggtctggcccgcggtacaaaggatggccacctgcgaaaactgggtcccgattccccccttcttagtgaggctcgtagagcctggtcgcccctggctatgggtcaactcgggggatacctccggcgccggacgctcgccgcgcccccgaagtgccggaggtccgctggccctctagcgggcctagggcctgaatccgggcgccgccgcgaccccgagcacaaccccccagagcatcaacggccgcggttactgctggggacgcgattcacccaggagaagaccgtcccgcagctacgtgatcctaagctgagaagcctcgtgccccggccccAgtcccggtcgcgtcaggataccgcgctgactgccgaaatctagacgcggagcctcaggAtcttgacgaccgcgggggttaccccttggccgcgccacattctgtgtcgaaacgtcgtgacgtcttcgtggggcggggggggggcagcgagagcgggagagcctagagtacggacagcgccggggggagggcggagggcgcaatggtttcaaaatcatcttccgagtgaaaggctatccgagatgcacacgggaccgcaacgcccacctagagctcctcgcCgcgcgcgcttggccactataacgcatgcggcGacgagaccccttaccctgggaacacttgggggggggaggctggcgtcagttccgaacctagcgggcctttcctggccggacgggggccctgcctccctgtcgaggacgagccgtctagcggccgcgacgcttgaggtccccagatacatgcgatgacctaacccaagaagGtgaatcaCacggacggcgtggcagtcgaacctaagcttgaagcccccttctccctcagaactgttcgggtcgcggcagcccgctagtacGtgcgcccttctggctgcccccaaccgggcccgcgccatcgccgctcctccgccggacagtggtcgccacatactcaggagcgcccggggggccgcccgtggaccggctcgtcagcctctgatctggcccccattggtaggccgtaccccggattaaccgcgcaccggtccccgaggaccgaagccaccctcccgggcacccgcgtctggtacccggccccgcggtgtatacacggctcgAactcacttaacgCccggcaggcgaaggtaagcgggcccggatccgaccggcggtgcacttctcggggcttcgtgacggcttacgcgcagcgggagcgaaccgatccgcctccgtcgcgtagtcgtcgtctcgcgcgccccgccccctgcctgctccggggcaatttcggggaggggcgagcccgtcttagtgagccccagggtgtgggcgcgaaaggaagccatacCttctgagttccgcgcgggcccaAatgtctctgtcccgggggcaactccgtgctcgcggcggcaggcgggccagttccagctctagcagctcactcgattgcaaaatccggccccctcAgcgtctatgagctacagtaggcccatgcgtcgtgttcaggcgcgccgcagtcgatcgcctccccggcgcaagggaaacctaatgtcgggtgccctgtccaactgacacggcgcccccctcaggcaccgtgtcaaaccgcagccatacggccccgcccgtacctaaggtaatcagcggaggctgccttccgcgtccagggttctagggtcgtcgcaacacgctcctgaccggccgtggggcaactcggccgagtgccctagtcggatggccgccctcagcgtagttctgggttcgtctgaacatattccaggccgctatgcggaaggaagggtagcgtagaccaagtaagcctggcgcggtgacccaatttcctgtcccagacgcgggtgttcgacgtcgagacttcaccaatggtcatcggctgcactcgaacattgagtatgggccgaacagcGgaacgccatatgtaacgcgctagtgacggtgcgcgctgcagaggccaCcaggcggttcggaatgtcccgctgggcccctcgcctgcaggggcgcacgacgtatctagagcgcacagctgttaggagcacagactccacgtgtcccgcgctaacgcgctccccccgatgcggcgagatgacagcggtcgtttggtctcgccactcgCgtggaaggcccgccatccaacgttatcgcctgggggcggcattttggtaccttcggtcacgctcgcctgtggggccgccctgaagcggaaactgtggggcgggttgggggggtcgaggggatcttggccggccatggcgctcggtccgccgccagtgccagggcgcggcacagccccgcgtaccgggggggtggcccgccgcggttccggccctggctcgcgccccgccccgcccccggggcctctaccctagcctcgtcttgttcaccggtgggcgtttccctgatatcatcgtcgccacagcccgtctggggtgaaagtacggtaggacccgtggaagcctgccgagcacgcggttcacggcgcgcggaggagcactccctgggcgggccaactcacgcttcgcaggttgccttgggtggccccgcctcttttgggcaagccaaccgatggcggtcgggattgccatcgcagcacgggcgcccaaagcccgtgcggccgccccagtgaactgccctctcccccggaagcgcccagtgcgcgaaccggaggcggggagcaggctcccggggcccCgcagcggtagcgacaggtggttaccacgccgcacaccgatggctccccatcgccgtggtccgaggcagccggctggcctcgggagcgcctcggttaaacgccctcccgccgctccgtcgcttgcgtcccccccccccagcccaattagaggggaccgtgggggcgggctgtcgctcagggaccccggcacgtcggccagcacgcgacgcccagcagccggggggacgtgcctgtcctcccgggccagttttccaactgtttggcctctgaagaagctaccgctccgCgccggcgtcgtcaaactgctcacctccaacccagttgagtctgtgcagcgccggcttcagcccccgcgcgccggggccagccgttcgtgcgctctgcgtggccgtctaagtcgcgaggcacagagggaagtgcggcgacccgtgccgtttcctttggggatcgtgtgctatcagcgttcccgcatgtcgatggagaggcGacgaagggcattgtgcgccgcctaacgcctctggcccatgtaggggtacacgggaccgcgcgcagaaagtatagttttgtacgcccgccttgtggagcaacacaaggcgagaaaggacacgccacccgaccccgtggcgtttgtcggtcagatgccggccgccctccatcgttctgattgctcgtagggtggccgcccgttcatacCaccccgataggccgtaccttttaccggcaccctcctcctctcctcgatcgtcaagacgcggctcaCagcagcgtggactacctcgtcgtcacgcccacgacgggcccgcgagggcgcgcgcggatccaaggacccgacgaggtggaagcactccggaagccggtacaccaccgcagggccgagagtccatcagagatGggaccaaatcgcttggcggccgggatcaatcgtcgtgggggaacaaGCAgggctttacggtaagacccccagtcaccgggtgcagtgaaactacgaaggggggcgcctagtcgcaGgaggggatgcgatcggtgaccagcgagagagtggctcgTggggacttctcggtcgaagttgtgccttccgcccacgtccacactgccgtggacgacaccgagtcgtagtggggaccgcacccccacgcggcgtcgacgtacgctccgggccgccttcaccgttcgctgcgggatacccGcgagatgcactcCcgaggttcggagttgagccatcggactcccgaggcgtgcagccttggagggcattcgtagaaactgcggcgggttgctcctggcgtcacgcgcggaggccgCcgcaagaggttgtcccactaggggacggcgtggagctgggcggacggcttcggtagaagcaccgtggttgacaatacactgggccagcgctctagaAcataggcactaggcgagagggccgcatcgcattagcgttagagccctaatacagcgactcaaccctgctgcgcccgtgggtggataggacgcccacacccgccgccgtacgcacggcgtcacgacctattgctcgaccatcgcgctgtgctcgacagggtcgcgcggctcccgcgcaggcggtcaattttagacactgtacgcccgacaacctttaggccccccgctcccggctggaggggggagatggtcgccggcagcattacttagaccgagtccaacgttgtcgctcggtggaggcagggcgttcgcccacgcctccggctgccccgcttcccaggtccggggggtcgtcgctctggaaccgtaggccggttctggtatagcctgctccccgtctccccgatgccgcaccaccttgacgggtcaagcggtgcccccccaccgcgggcgggcccagcttattcggccgccctgagtgtgcctcccctttactgtgtaccgGaccggcccgcccatcgggaaccaaccggcgcccgttcagtgctggcgggaggccccccccacccctccagggggtcggcggtaacgacaatgggacccaggcgaccgtccagtccgccagCcacccggggcgacgaccccggccctTatgtccggccccgtattCgctacacgccggccaaaagcaacatacggattCtgggcatcatatttgtatcacccacaggccgtcctccgttgccacgggacgcgtggatctcgttgggatcggttcgaaccgggcccccttctgaaacgcaccgtagccggcctgcgcaacgacgccacggggcggtcgccagtcgcttgtccccgggggcggtcggcgggctggtatggtaaactctatcgtcccttGagggaacagattcgctGtggggcatatcagcccaggggtatgggcgcctgtttcccctcctgatctcaccccgattgcggtagcgcgcgcgcaaaggtgccacgagcttcgcggcgccactctccccccgcgccggacgaggtcgcccacaggtgctgctctaggtggatgattgtcccgggcccaggccgcggcgccatcatttgccgttctctatcctcgccccgtcctgtatgcaaccgtcccggaccttgcggggggtcacgttacccgttggtcaacggacgtcattctcttctagctttagggacagatagtgcGgggttcgagccggagcgcgcgggatgcatggccgcccttcgggtggcctcagcccccccgcgtgggtgcgctggcaacTccaagcaaacccggccgcgagaacggcatcggcgcggcgttgcgtcgccttctacgcaactcgcagaggcgggatAaatgccgctgaggcgctcgcagggacccctgcacccgacttcaaacgcctgacgatgccgccccaccacccgtgaccaaacctgcacgagccccgacggctaaaAtctcacggtacaggatggttagtcctcaggagttgcatgcgcatcggcttgcaGtggtgatcccgtcgccttcaaggccccgcagttggctggggcctcgcggcagccggctacaaccccggcacggcttggcgcgggtgcccacggccagttagaggttccccgtggcacgggatcggcgggggtccggggtcgcaggggccccagtcgcagcgcctgcaacggcccactgacgcgcagcccggtcgcgcggcgGgccgagtctaGttcgagcggcgggatggcgttacggacgggcgtcgccataccatcctgcggtgggaaaggtgccgccgggtgccgttctagccggaccggaggaaggccgccgggccccgacttaccggttgggggcactgtCcggggaacgctccacccatcatcaccaagttAattcctcggatcctcctgcggacggccgggccgcCaacgcgcccgaagtcgtccgccaacgagacgggtcgcggctatggaccggtctattgtgatccggtgattgaagaatcacaagagcggtaacgaacgcgaagcgggtttatcgcgcctcctctgctgcccccggacagttCgcctagccccggcccagccagccagttgaccgcAacgatgagctataagctcacggcggccctgacgacgagtcaatacggggtgttcggcgacccttgctcagcgtccCttgggcggccTagtaccagaactcttagcgcaacgcacacctcaacgccagggtgagggaaaagaccagagcacctcgcccgcgcagggtgcccgccgcggcactacggacagggggtgagctcaagaagtggctgtaggtgcggggcaggcgcgcggcactcccgagggatgctccgtgcgggggcagccgcggacggcttctgggtttcaaacatccaggcTtccgcttcaacccccacggccccgccagtcatagtcctcggggggggtagggcgctGGGGCttttgtgtcccgcggcaggtagagattcCccaccctaaagaggctctcgcccgccgatgcccgcagggagacaggcggcacaaaagtcatgtggcaagcgccGagggttgggccccttggagggcctgcgggcggggattgagcggcagatgacagatggccgattgatggggcgccgcggccagaaagggcgcgtaggggacgctgcgcgtcacccccgaaacgagatcagcgctgggcggcgcggttgccccggatcggggtggtcccttgggcttggcccagccggcagcggcgggcagggccacCcaggtacgggcactacagacgtaccctgcgatcccctcctccggtttcccccttcccatgacgcgatctgcgtcctgtctgcgccggcgcggggaggggtgtctcaccggagacccatggttcccccgctgtctcatggctatcgcaacgtcaaagtggcacCgctaatgagtagggaccgaggccccggcgagacaagcgggctggaagtcgatcgctgtaggcgtcgcgaggcccaggacccacatagggggggacAagctctgcgagtagcttcaggggggccAcagaggaggccttcaccgacggcggcgcggtcgggacatgaggtagaaagccacagggagactccgcaccggagggagtgcgggctggggtcgaaaggagcgggcgaggcacgaggggcctacccaaggggcgtgcgtttgcggtaacctaaaggcccgctacctggacggggtggagcggcgcggcggccccatacgtccgggtcgcggagagggagaaggcgaccgtaggcgttgtcccgcgacacgcctcaccgatccgaacgccccgggagagccgggttggacgcgttccccgtagcggccccgcgcgaggccgcccggtgaggggcgggacgcaacgactccggccgcgacccgggctgcaccttccgccgggcccctgccgaggtgggacgtgggtcttcgaagtgtacctgaaaTatcgcgagcggggcgctaggctgcggatccctccctcgcgatacccggccaagccccgtgcccgggtgggggtgggttatctgcgcggtgtctgcccgcccaggcgcgccgcgttaacgaacgggaggaccagcgcggaatcgtcgtttccgagcccgcacgcccagggagtgaccggcactgcggggggccgctggcgctcattcggccgatgcggcCcggcgcatagctccctgctatctactagtgatgtatggcccgccccggggggaggcgcggtgggtctccgacgccgctttgccgccggataggggaaggaagacgccctgagaataactcaccgcaccccctccgggcggtcgagcgtgacgcgtgccagtcGcccgcacaggcagggcacggtcagaccaggttccgtggggaggggtcgggggtagaggccgatgcacgggGcgaccgcgtgaggttggaccgagtgaggttgagtcgtcgcgcgctcccggacgggcggcgcgcgccagtgctcgagtctagcctgtggggtactctgcgcagggttaattgcgctggcagcccagtcagttcgccttgagttatctgtcccctttcgcgatctcatgcggtgggcaattcgtctacggcccttcccaggctactgcacggcccatgctcgtttaggatctCcagccgcgccgggccgggagggtatgagccctggtgatgccgacatcccccgagatgctcatcccctcgtggcgccctggcaggtggacttgggatggccccatacgtacggacgactggctgctgcgggacatggtgccaatgggaccgctagtccggggggtatccccaatgccccGGgcacgcactttcgggcggtggcggttcgcgtgagcggggaaacgcaccagggaagctgtacccggggccggagtcgagcgaagccgctggccaagactgattGctccggcggtaacgcaacccctggttatctaCtcacggtgtgacccgagccgacccccaatTtctaacccgataatgcggtaggacgtttccggtaagggccgctttacggagggttaggcttctcaccccgccgcattcccgataggggccccaggcccaaccgaccggcgccctcccgccCGcatcacaggggcagggggctggaacccctcggcgccccacggcgcccacaggcgtgtcagcatccgccctgaggcaaggcttcttgtgccagcgcaggcgtccacctacacgaaaggaggtctaatggtaggtccccgaatggtgagcgctggcggggctggggagtctcggcagcgcccgccccaccgcgcaggcgcgcttaccctccctggtagccCgatctgtccctgcacccagggtggtagcggctcacctcgcagggcccgggctatgcctcaccgaacggtcccgaagcctatcttccccgttgtggtgccgcctcgatcctcgaaccgcgtttagctctggacgctctgaggatcgaggcggcgcgtttaagaaaaacacctcgtgtacaatgtgtccccgccgcagagctatggaaacacgtggacagtccgagagttgcgggtctagcaggaggggcgccagcaggactgccacacagtcgcgatgtagtcagggaacagGcGccAtctcaCtgtgaccCaccgattgctcagcagcgctggaggcgccgccgccgcccacccggcccccccggaaccgggctcgacgaccattcttcgtgtgccgaccggtcgcttaccacgcgttTgtacacggtcactcctAttCcgctacacgaaaaatctagcaccaagctgggacgggCcgtgggggctggcccagctgtcccctcggttgttgCgaacgagtccgcggacgtctcggctagctcttcgcgttcgtctactatacatcacaagacaccatggcccttcgagagtcctgagggtgacgagcgcggccggcgcgtcccgtcccaacctgagtggagccccgtagagggTgacgggctggcacccaccccaaacgttcgtcctggcctgtagcccaagggttgatgagagggctctggcggcaggcggttgatcgcgtggctgcgcgtacgactctcttctacgctccaaagcAacattctgacagaggcctcggtgcagccgtcggctccgtaggaactcacccgtctcccgtgtccctgtgcgtcgctaagagagcccttttgctggccgctttgcctcgcctacaggcaggtggcggccgggggtgggacagggtccgccggaccccggtcccagtaggcctgaggtgggactcacctcgacccattcggtcatggaaggacgctccgtttcactttactatcaagggcggatcgctaggctccggagagcctcgcgggggggcgtaggggcggggtccgaGtgggtcgatgagtgagcagccAccctctcgcgcgcttgggaggccgtgtctcatagggGggccaccatgagctcacgtgcaccccctgtctcgctttgcatccctggtacagccgcacttgggctcggcgaagcagtaccggtcgtaatgggctagctgacagtgaacgcctccctagtgccgcacaatagtTataacctcaacccgcaaCttgagagcgtgtaccagctcacgatgagtgaggacctgcaggtatagtctgacagtcgggtggactcgcggacggcggcattgtggcCgacctgatgctcccgcgtgctggcccagcgtgcactgccccggcggacctccgaccgcaccagtagagttcgggctaagcccccaatccttccactgtctgcaagacgcgcgcgcttggcgatacccggggggggagcgcaacggtccaagggcggcgggctgctgggccggcggcgcggcggggcacacgggggggcggctgagaccgtttcgtggctggccaggctgcagctcccaaagggcgtcagggggcatccccgggcgggagaggccgcgacttctgatagtgggtgccctatgctggtgaactatggccgttgctctgtcccagggcccaggatggcgggaggtacatgtgcagcaagcacgccggaccacgtcaggcgagagaggcgtagggaaacggcggggaggacgttttcgaggggggggccggtgctcgccacggggggctgaacaccagtgaaagtgcAatcccggCgctgaccctctcgccgccgatgccgccaaaccccaaagattaGcctccctaaatcatcgtgggcacgcggtcgagcaaaggggcgggcttgtagctagactccagcctcgttcgcgtctcgttctcccttcgagggccttgccagggtccGccagaatcatctcctggctcctttgtagacggcgcttattgttcgcccggagttggcggaggacgggcaagtggcgtggccccctactagtcactgtgtagttcgccttacccactccgtcgctaacgccgctgggcgagtcggatgctgtggaggcagcaatacgggtctaaggcccactacacgaacccggaacggcacaggattgtgcgagatcgggccagccgccattcagccctatacaataatacccccgagggggggggggccgctaagaataggcgccaccgcggctcttggccgcacgcccgtccaatgtgTttacgtgttgcccgacccgtcccggttcttagtgaggcagccggacgaggtagacctcgagcgcgtgggcagggcgaaaatcggcataccatgggggaaacgaccagcagctgttgcccgaggggaggacatcaacgtagccggaatgccggggaggccgcgacgggcagaccgatgcccagcgcgtgaccaacacaatcttcggagagtctccagacccgctgattccgaaaccctcccCaatagccctcacgcagagttcatgctgagcgggctcgcctcaacagcacgtgggaacacgccgggcctagccgaacttgtatcgtggggccacgccgtcctaagcgccggcattcgctctcttttagcatcggagcctctacggcgcctcgtgctgcggcgtcgaccgctctgtttagtccgcacggggggatgcggcagcgcggtaagctccgttgcccgtgggcgctgttcagatacaactggcactttgacccgcggtcatgAtttggGGctgaggtcagcctcctcTagggcgccccggcgataaagatcccactagaacttgctgctagtattgttccctgctgggccaaaggcagcctccagagcacacatgcgactgtgaaaggtgagcggcgctgccgaggctgcccctcTacccggatgaagtcaaagcccgagcggggcggcccagcggtgcacgccggagcgctgagGatatatgcGgccacgtgccgcacatgtcgctccgggcccggttgctcctcttcaagcgtCgcgctaccggccgggaccgggcggaacgatacctcccattagcggcccagCggcgggagccgcggtcggaacgccgCagtgatctAggtccgccacgttcgggcagctcgaaacctcttactttacaactccggaggcgtagcgattcaagggacCtctctagcgcgcctgcgcctttcccactatacgtggcagtcagcgggcaggcccgcttggctAcatgcgactccgttgaaacaccctcgtcagtccacgtcgggggccgacaacgccgctaaactcacagcctccctgaggctgctatgcacacttacctcgcaccgtctcgacgcctagattgTacccaacctggtacacctcggcccgtCctacgggcgcCggccgttggggggcccccccagCtcagtgccagcttcaggttccacgcagactttagcacccggatctgggagatggaagagtccacacgttacacatgaataaccctgatttgcgggtgttgtccaacgcgtccggcacattccgagccgccgcgcttcgcgggcctacggctcaaaactggaccgtgcgtggggagagccgtacccgccgcgtgcgcaccggggccgGtcaacgttcggggcgggggtgaGctagtgggtgaagagtcctcgcctcgcaggggggcacctctagcaacggccggcgcgccgcagatttcagtggacgtccccgccactgagaccagttactacggccttaccttctcggttgtctggcgcccccgccatCtgcgcgtcgcgatcttaacaccggctaagtcctgccaagaggtctaaggcaggcctaagtgggtccgcgggcttcactatagccgttcttcgctgcaggccgtcgtaggggaGccctcggcacCtcccgttgatcTgtgctgtctgacgacgaggcaatggctaacgaccgaactcctctggcaccccaagggtggtgcggcgcgatcaTtcgccatgtaacgcgtcctctccactgtcgcaggcgcgcttgccgaggtccgctgcggCcccAatgcgggcgagactcctgggcagggggccggaaaacatggcgatagcgccgtaaggcaagccgggtcagccaaacagcatagtagcgaacctagatacggtgagggaggggggggccgctcaccaaagcggcgagcggcggtgtggcggcgaccagccctgtttgcctagttttcaacactggcctcctggcggtggcaagacgccgcgcgcagcgtacatgcccaagtcatgcggaacataccgagctcgctcttttccctcagccgccctcggggtaggggccctccttgtacgtgctggcacgatgtcccggtatcgggtcGgcaacctcGctgggagattgacgAagcagatcgaGacgggccattccagctggtacccagccaatgagcctgcggcggggattctgccggtgaggccggAtgctatgtcgtcccggcccctcccacgtattggcccccgcaggcaatagggagtcccccctgccaccctaacatctttctactgcctcggcgacagtcgtCgcgtgagcggtcgcgacgccgtcaccatacagggagcggcttaacgggcacgtacgcgcccgtactacccgcggccgccagccggccacaggaagtgccgaaactccgcggtcctccgaggaacgcggcccgcggccccatggagggAgggggaaggggatgtcggcacGagtgccatggaggtgcgggactttgagtcctgacgcgcggctagctcctgatccgccggctggtcacgtggctgccaggtcacctcagatccggggGgtcctccagcaggcgcccaccccggtctcggagggcctcccgacggggccgcgctccggccgcggtagggtccgggcccccccccttacccgcccgataaggcacgctcccaaattcctggacccgtccgggcattatgcatagtcagcgctacactcccaacggggtgtgcggggcctctccgccgccccagtcgcaggagacgatgcaaaggatctgtcccggtcggccgtcgagcgaaacaaccgggggaatcgaaaagcgacggtcgcgggggcgccgccgaatgccgagcgcgattggcagacgaccggggtgaagttccggggtcgcgcaattactaaccccaagggatccccgggggccgagggccgcacggtggtcccagatttgtagCgttcgAtgcagcgggatacagcgcgggcggaatgcgtagcctgggtTttccccgCaacgggctggggtcgcGgtcgtgaGgcgggggcgccccgctccggaggggagcgtagagagtgaggctaagacctacgaaagagtgcccctggctagaggtaagagccttatgcctcgggtccggcgacgcatggcgtctgctgcacaggcggggcacgtgaaccgactaacagtttcccggctgattgcctcggcccaaacgctcgctcccacggtcggcctagtgaaccccaccctgtccgttcggacaattgcgcggacactgaacagtccagggactcgggccggtccgggtcggcaattggtttcCaagtcggtggcggcctagacctccggacgaccggAaagcgcgtctgctagagggcggggcgcggcggcggaagtgggtgtggcgaggaccacagtccctcaccgtcgaagcttcatcgtgtatgcgcctccgaactAagcgtaaatagcacagtctgtcctgtgagcccgcccggtccgcactcgccccctcgcgacccctctactgctacctctGgctcgaccTctaggccggtctcctagctcccgctcactagtcccggtctgtcgttggggtgggtcggggtgTcctgcgtgctggcgggtcgacccacctgcaggccgtatctgtgtctcgatcgcccgggcataggctggcgcccgagccgctatcacggctccatgccactatatcgggatggcccggggctcactatcattcacagagacccgcggctcaaggtatcgtcgttagtgtgcacgcgtcccgaggccgccggaTgctcagcgtctgagatccgggtcgcggggcctatatcgacgcgctgagagactagcagcgccccatcaacgaggcctgaagctttcgttgtcccacgtacttggcgtttagttattgggctggccccacaatagaagcctcataccgtggctgaacgcccctggtgctcctctccgcgtccatcctctcggggattctaccgcctcgttaccactgactcgacagacatggaacgaaaatggcctcgtatggcaccggtaggggcccgcatatgggcttctccccctgagcgtctgccccccccgcgagcggcctgacggaaaggcagggccatcgggaggcgggagctcggactcccctaggtatggccgagcgacccatgtgtttgcaccgagcaacaacagcgaaccgcgaggcggactcgtgggcgcgggccagccccgtcgccggggctgcagcagctcgggcgcggtagcctgcgctcctcgcgtcgatctacgacggtccgggttgagcgagacccaaaacgtggggtagaagtgtcaatagaagcacaccgtccccccatcgcaggggggttcacgggcctctagtcagaatcagaatgcctctgtgcaatggccggactcggcccgtggagtctcccctggcgcagtcgggaccgcgggtcccattccagctctttcgctaatcgcatgacgggaccgtttagggcggggggaaccgccaacagcgcccactaccagctagggtgagcgaacgaacagccgaggcgccccggctgtgggccgggagcgctagattttaggGccggaggactccgagcggtcggccactgtcatctcgcgacccgtacttgtggtagccttgggccgcccggaacggcctgaacacccgaccagtgtggacgctcgctcctgtcgcctatcccagccccgccgTcccggcccagcgggccacgttagctcccaCGgaccggccctgacaccgcgtcccatggcctgattgaattactcgtgggccgagtcgactgcgacgtgagctcgtaccccccctagttaggataccccggatgttacgcTgatgtgcgccataGtcgcgctatcgcagggtgcaggcagctgagacgtaggccActcccccaagaacggcgcctgCacgCcgGggcggcctcgggctacaccagtatgcctggccTcggctcaggccgcgctgcgacctcgggattcagggtgggcatgtccccgctagaccgggggacgcgtggatctaatgagtactgctcggctgagtcgaggcacaatcgggtacgcctgggcgtcggccaccgaacctctagagctggggtgAgtcctagcccgcggttaggtgcgatgtggtccatcacccccctggctattttatggggctcgcccatgcctcccagccgcgcttccgatgccggcccctccagcaggatggggtacgggtggcttacgcTgCgcgccgcgggtccgggcggtggggccgaGtgcgcgcgggtcccgtggtcccagctcccgggcggatcgtcctcctctctcacaaggcgtcccgagccggtggtcgccacgtgagcgctcTccactggccaaacctagcgtgctgccgtctgcgtcacgggatacaccgatcgaatgtttagacgtgccggcccgcctgttccgcgaggtccgctaaacgggccatgatgcggaggggcggttcggggcgctggccgagccacaaccaccatgcccctcaggccgggcggcgctccggggctcgccggcgggcgtgacgctgaccggaagaggccgaggcagggacaacggtgagagcgtctggagtgcggacggtaccggcatcgtagtaccttgaagcacagcccagatcacgacgcaactaagcggcgtgccgggtacacctgcgtatagtcctccgcacggagctcctggtgacgtggcagagctaagcagtaTcatcagcgtgaagacccggggagatataacccgcggtgagcaggattccaagttagcacagcagcgcgcctacgggtaggatgagatgccccccacGagtttgtcggtcgaggcctcacattcctcaatgggccgCgcggcgaggcggacgctccgtggcgccgtgagggatcaTcaaatCagtcagcccgttatcccctcttcctgtagaggccacgagccatcagagggcagGacgtaattgtgaaactggctgcgggggacagcacaccctaacctcggcgagccaacttcggaactgataggcattgccgtgtagggataaatagggggcgagggagggtccccgcgactaggcaatagcggaccggaccaatccttcgatggtgcggcgtcgcttggaggcctaactgtttGcggcactcaccatcggaagggcgccgtcttcgaagggcacacccccacgtctcgcagcatgcaAcctgttgtgttgaccggaggcgccgcccgtgccCgcgcggaggtgcgcgagcctgttctatagtccaaactggacagcaattcgctgcgtaactttcccagcgcctgcggggacgcggtccttcttgcctgGcgccagctgtaatagggggccgaaaaatcccccaacggttgtgcctggttgaacatccaatgattctagcgcagatatgcaatccctttaaagc
>xcm4395.filtered
cgcaaagcaggtttacgtatagTtagtgggagacgtgtaacaggcctgacacccCtgggagttacaacccacaccggcacaaggcagagggagtCtctgtgtgGgagccggccgtgtcatcccggctacgcgcccgggaagccggtgccgcccgtgGggcaacagggcatgccagcaccatccggaagcgacggtcgtgtcacctggtagtgaaagtgcgtatcaatgtagtccaccctgtccgtgctagggcgcgaccccccccgcgtcgaggcgcagtgcccaacgagtccgctCacccaaagtggcccagaccccgccctcgctgggcgagtggtgcggcgcgggtcagaggggctgacgccgcggtgcgtcagaggcggcactcaccgggctgtggtcgggctacccgtccccgtcgctctcggcgctacaaggggagtacgccccgctcgccgcgcccggcatgaccgcaagccaaatcAgcgcggagtgacattgggcaccccgaggcagccagagcttgtgaccggggcgggccgaacgtggacggggggggaacggggggcaacgtcgaaggaggcgggccacagggggcaagcggggctcccgcccccgtacccacgccagtagggagaattgcgttgcaacgtttcgcccctggtgcgcgcAtctcgactgctgccgtcgtcgtgggcaagagacagtcggcagtcgagggtcgcaccggcggtcttccgctcatggccgcgccctagcgcgcatgaggcgcgcGtgggctaacgtagctcgtcttaaccgggGcctacggtcAgtgagctgtgcgtctggaccgctcggaaacgccggtctctggaggctaccccgggtggccacctgccccgtgggGgcccgcctgcccgaggcccgtccgggcgcccacccgcgcgggcgcacgcgttacggctgacgcccctcgccgtccggcgctgcccgggggcaagcctttggtctcagcccccctcagcacgagcAcgcagccggacaaaaacaactaggccgcagacgcatccgaccggtactcttgagagtgccccccccgcgcctggtcgccactgctccccccgctagcgcctccggaggcttagccttggcggttcgcgcgcctcgaaaagagtgtgtcccgcgtctctgtgcgtgagaaattacgttgcttggtcctcgttactacgtaggcgttgggatgcaaggccctatctccggagcacaaccgcatagcctgaacttcccaccaatacctattccgccgctatacctcccagagccggcccgccctcaccttgagcctgtgctgacgaactcgacccctggtgtccggagccgacagttgatcgttggccaccgagctgttaaccgatgcagcgctccgatgcctggccttctacggccgaccacacaacaaaaaaggggcagctgcggggttgaggggcgggcgccctgccaacgggcccgcggtccgcCtgggctaggagggtgagatccggatctcgccccgcctgttctagcaccgccgtacaccctcggctgcctggcgaccatgtgccccatccggaaggatactccatactcctgccgttaggagaagttcacgcgttccgcgcctccggggcaggcgctcggcaggccatcggaccgcctccccgcacttgggcgcgcctccgccatagggtttcccggcaaatggacagccggcaatcgcttgcagaggcagcaggcaggcacgcggtcggccacccgggccctggaagcccaccgcagcgactcttcgggctacccggggtggtgtcggatgcgtggcgccgtgcgaggggttggtgggtacgtcgacctacactgtcggacttgggtgctgccatcgtagcccgcgtggagctgcgcccctggacgctgtgagtccgCtcgcggtccccgccacccgcccggattaccgcaggtaaaaacgtgcggcgcgcgcccatacgacgggggcgggccactccgccggcacccggaaggctgtgtgacccaacgaagatggaattatgtcgtgttccacccgtggtctgcaacgttcggacgggcccgcccgaggattgttggctccaaggagtcgaactaccgcacacactgctgaacattatgtgcggaggccgcatgacccctcggttcagttgggcCcccgagtggtagaagggggctaatcaaagctggtggcccgaggttgagcctggggaaaaggcacgcgggtacagccccagacacaattggcagaaaagagctcgctcggcgcgtccgctgtacccccgcgccgtttttcccggcgcttcttcgcccccccgtcggccactagaaggccacggtcccggatttgtattcctccctgtgctggcctttggcccctgcgggggcaaggtaccagaccacgcggcgagtataactacagacataccctcgtggccgcgtctcgggccgccccgacctttCGgtgggggccactccgatcgccccaaatgtttgcccgccggccggtaactatcgcgctagagggcgctgtggacactttcccaccaGtgggagtgaTggtcattccCcgcccgAgGttacatgaggccccccgtcaggacgggcgccgcgcgatgggcgtccccacgagcaccagggcgaggtgtaggtggggactcccaggggtgccgcgggccccaaccgaagtagcagggcgcgtgcggggttcacagagcggttgggtggccgctttggcgtacccccgccggtccaccatttagcgcggtcgccgcccgctacggggccggggcacccggtgcctttcctcccgcatcgaactatgttgcgGaggtaactgCctgcgaagggtcatcccctccgcttatgggttgtgccccgggtcgttcacggcggtgtcgcgtggcgcgggctcccagcggaccgccgCcggagcacagttgcccaacgcagccgcgcgcctacttacggggggggccggagacggcttcttctcgcagccggcgctaagtaggtggcggcatcgcgcgcttacacggttgtcttTgccatgaggaggaccggccgcctacgcggctgtttacggtggtggcgggccccccaaggcatgggcgcagctggcgccggccggtgcgacagagtggctgcgaactgtcatgggtaccggggcgtggagcagaagcccgaggcaaacgccagGccgcggccggtGaacccggtacacaccacgctacgaatcgtgatggcggctcgccgggtggatctaccccgcacgccttaggttggagcgggctagccagccgtcgggcggatgccaccgccaaggcggggccccgaccgggtgagcaaccgcacatagcccttcaggacaagcgcctacccccgcccccctacccatcctcgccgatctcgcaccgagttgtgcctaagctagcgaaatcttgaccgggttgtccggccccggcctgagccatgcgaactcggagctcgggaccccacgccctctctcgcAtattttgcctccccccctcggggcggctgtgcccggtgattcaactagtctccgtagacccctggcgtactgcggggcccccccggggggactgttccggacgcgaatcgcttcacgagcctgtgtccgcactgggcgccatccgggccgctgggcggtcgacctgtggtttatggacccctctgatggccgctcccgttacgagaagcagcggccgggtGgcgtgtccagtaataccccatcgcttacgcagcttgCacccgttaggaccaactatacgcgcgggctcaacgcgcccctgaccccgactgcggaacatctgagcgctgaaacgccccgcccgacacgGagcgggctgcgcccagccgacgagacagaatgtcggttttgaaagtgcaggcctggccgtgctcgtcccgcccgcgcccctgcgtgTggaacgctgtgccaacggccagctcccgcgggtggtcctCgccccaaggtgacatggcgctccggcctgccgggtggggcaccgggggaccgcagaagccgcgtggcacgggatttgctcctgccaacttgacacggagggcgccctccgtcgctcggcggggggtttccccgacgccctgcaaccggattgtgacagtaaatttgttcgtttacattcgggaccggagtattgcctgagacggggattgacaaggagacgtttccatacccaatcgccccacggcgggggcaacgaAGctgggccactgtcgccccgcacccgccgttggccgaggggggcggggaccccggaaagccgtctgggcggaccccgggcaccgggggggaacgcGcggcgatcagacggcccggctttcttccgccaattcgagggtttgaaggccgaatgagcctggtcggacccagatggtaagggcgagaggggggaaaccgcgtaggctcgGaccctgccggcttaggaagtggaagcaacgaccgcgccggcgcgtacgcctctacgcgactccggctcacagccgtccgcaagggcccagcgtcatTacCagcgccgtcgggtaaggccagccgtacgccgcaagggGttggcctccctattgcgggcattagtcggcccgtgcttgcgtcccctacgcgaatcagtggaatccacctaaaagtagcctacttcctcCagcgaggtctagccggactgcggaggtcgaatcgtcctaccccgcgaaaccggccgcaacggcagctactctcaagatgcggaggcattggccgggtgcccgggcgtacCgcAtggaggcgacgcaggcggcctctagcggttgcggcccgtcgcgtccaccaccgcgctAaggagccggcgggcgcctagcgccacgaggagggtagcgggcccttgggGttcggcgccggccaccagcgccttagtgtaggccgcggcgcggcctgtccctgcgcgttccccagggcttcccatccccgcgcgtgggtcggggccagggggtgccgttgccgtggtaagtgcggcaccggcattggggcccaatctcgcgacagctctgcgggtagtactccaccctatcgcagccaatttagtccgtcatagtggctatcgtgcgctgcgggcccctggctgccggttagcgccggagggctaccccccggaccggGccgccccccacaacattacgttgcgccggtggcgcggaggcccgccggggggtctggcccgcggtacaaaggatggccacctgcgaaaactgggtcccgattccccccttcttagtgaggctcgtagagcctggtcgcccctggctatgggtcaactcgggggatacctccggcgccggacgctcgccgcgcccccgaagtgccggaggtccgctggccctctagcgggcctagggcctgaatccgggcgccgccgcgaccccgagcacaaccccccagagcatcaacggccgcggttactgctggggacgcgattcacccaggagaagaccgtcccgcagctacgtgatcctaagctgagaagcctcgtgccccggccccAgtcccggtcgcgtcaggataccgcgctgactgccgaaatctagacgcggagcctcaggAtcttgacgaccgcgggggttaccccttggccgcgccacattctgtgtcgaaacgtcgtgacgtcttcgtggggcggggggggggcagcgagagcgggagagcctagagtacggacagcgccggggggagggcggagggcgcaatggtttcaaaatcatcttccgagtgaaaggctatccgagatgcacacgggaccgcaacgcccacctagagctcctcgcCgcgcgcgcttggccactataacgcatgcggcGacgagaccccttaccctgggaacacttgggggggggaggctggcgtcagttccgaacctagcgggcctttcctggccggacgggggccctgcctccctgtcgaggacgagccgtctagcggccgcgacgcttgaggtccccagatacatgcgatgacctaacccaagaagGtgaatcaCacggacggcgtggcagtcgaacctaagcttgaagcccccttctccctcagaactgttcgggtcgcggcagcccgctagtacGtgcgcccttctggctgcccccaaccgggcccgcgccatcgccgctcctccgccggacagtggtcgccacatactcaggagcgcccggggggccgcccgtggaccggctcgtcagcctctgatctggcccccattggtaggccgtaccccggattaaccgcgcaccggtccccgaggaccgaagccaccctcccgggcacccgcgtctggtacccggccccgcggtgtatacacggctcgAactcacttaacgCccggcaggcgaaggtaagcgggcccggatccgaccggcggtgcacttctcggggcttcgtgacggcttacgcgcagcgggagcgaaccgatccgcctccgtcgcgtagtcgtcgtctcgcgcgccccgccccctgcctgctccggggcaatttcggggaggggcgagcccgtcttagtgagccccagggtgtgggcgcgaaaggaagccatacCttctgagttccgcgcgggcccaAatgtctctgtcccgggggcaactccgtgctcgcggcggcaggcgggccagttccagctctagcagctcactcgattgcaaaatccggccccctcAgcgtctatgagctacagtaggcccatgcgtcgtgttcaggcgcgccgcagtcgatcgcctccccggcgcaagggaaacctaatgtcgggtgccctgtccaactgacacggcgcccccctcaggcaccgtgtcaaaccgcagccatacggccccgcccgtacctaaggtaatcagcggaggctgccttccgcgtccagggttctagggtcgtcgcaacacgctcctgaccggccgtggggcaactcggccAagtgccctagtcggatggccgccctcagcgtagttctgggttcgtctgaacatattccaggccgctatgcggaaggaagggtagcgtagaccaagtaagcctggcgcggtgacccaatttcctgtcccagacgcgggtgttcgacgtcgagacttcaccaatggtcatcggctgcactcgaacattgagtatgggccgaacagcGgaacgccatatgtaacgcgctagtgacggtgcgcgctgcagaggccaCcaggcggttcggaatgtcccgctgggcccctcgcctgcaggggcgcacgacgtatctagagcgcacagctgttaggagcacagactccacgtgtcccgcgctaacgcgctccccccgatgcggcgagatgacagcggtcgtttggtctcgccactcgCgtggaaggcccgccatccaacgttatcgcctgggggcggcattttggtaccttcggtcacgctcgcctgtggggccgccctgaagcggaaactgtggggcgggttgggggggtcgaggggatcttggccggccatggcgctcggtccgccgccagtgccagggcgcggcacagccccgcgtaccgggggggtggcccgccgcggttccggccctggctcgcgccccgccccgcccccggggcctctaccctagcctcgtcttgttcaccggtgggcgtttccctgatatcatcgtcgccacagcccgtctggggtgaaagtacggtaggacccgtggaagcctgccgagcacgcggttcacggcgcgcggaggagcactccctgggcgggccaactcacgcttcgcaggttgccttgggtggccccgcctcttttgggcaagccaaccgatggcggtcgggattgccatcgcagcacgggcgcccaaagcccgtgcggccgccccagtgaactgccctctcccccggaagcgcccagtgcgcgaaccggaggcggggagcaggctcccggggcccCgcagcggtagcgacaggtggttaccacgccgcacaccgatggctccccatcgccgtggtccgaggcagccggctggcctcgggagcgcctcggttaaacgccctcccgccgctccgtcgcttgcgtcccccccccccagcccaattagaggggaccgtgggggcgggctgtcgctcagggaccccggcacgtcggccagcacgcgacgcccagcagccggggggacgtgcctgtcctcccgggccagttttccaactgtttggcctctgaagaagctaccgctccgCgccggcgtcgtcaaactgctcacctccaacccagttgagtctgtgcagcgccggcttcagcccccgcgcgccggggccagccgttcgtgcgctctgcgtggccgtctaagtcgcgaggcacagagggaagtgcggcgacccgtgccgtttcctttggggatcgtgtgctatcagcgttcccgcatgtcgatggagaggcGacgaagggcattgtgcgccgcctaacgcctctggcccatgtaggggtacacgggaccgcgcgcagaaagtatagttttgtacgcccgccttgtggagcaacacaaggcgagaaaggacacgccacccgaccccgtggcgtttgtcggtcagatgccggccgccctccatcgttctgattgctcgtagggtggccgcccgttcatacCaccccgataggccgtaccttttaccggcaccctcctcctctcctcgatcgtcaagacgcggctcaCagcagcgtggactacctcgtcgtcacgcccacgacgggcccgcgagggcgcgcgcggatccaaggacccgacgaggtggaagcactccggaagccggtacaccaccgcagggccgagagtccatcagagatGggaccaaatcgcttggcggccgggatcaatcgtcgtgggggaacaaGCAgggctttacggtaagacccccagtcaccgggtgcagtgaaactacgaaggggggcgcctagtcgcaGgaggggatgcgatcggtgaccagcgagagagtggctcgTggggacttctcggtcgaagttgtgccttccgcccacgtccacactgccgtggacgacaccgagtcgtagtggggaccgcacccccacgcggcgtcgacgtacgctccgggccgccttcaccgttcgctgcgggatacccGcgagatgcactcCcgaggttcggagttgagccatcggactcccgaggcgtgcagccttggagggcattcgtagaaactgcggcgggttgctcctggcgtcacgcgcggaggccgCcgcaagaggttgtcccactaggggacggcgtggagctgggcggacggcttcggtagaagcaccgtggttgacaatacactgggccagcgctctagaAcataggcactaggcgagagggccgcatcgcattagcgttagagccctaatacagcgactcaaccctgctgcgcccgtgggtggataggacgcccacacccgccgccgtacgcacggcgtcacgacctattgctcgaccatcgcgctgtgctcgacagggtcgcgcggctcccgcgcaggcggtcaattttagacactgtacgcccgacaacctttaggccccccgctcccggctggaggggggagatggtcgccggcagcattacttagaccgagtccaacgttgtcgctcggtggaggcagggcgttcgcccacgcctccggctgccccgcttcccaggtccggggggtcgtcgctctggaaccgtaggccggttctggtatagcctgctccccgtctccccgatgccgcaccaccttgacgggtcaagcggtgcccccccaccgcgggcgggcccagcttattcggccgccctgagtgtgcctcccctttactgtgtaccgGaccggcccgcccatcgggaaccaaccggcgcccgttcagtgctggcgggaggccccccccacccctccagggggtcggcggtaacgacaatgggacccaggcgaccgtccagtccgccagCcacccggggcgacgaccccggccctTatgtccggccccgtattCgctacacgccggccaaaagcaacatacggattCtgggcatcatatttgtatcacccacaggccgtcctccgttgccacgggacgcgtggatctcgttgggatcggttcgaaccgggcccccttctgaaacgcaccgtagccggcctgcgcaacgacgccacggggcggtcgccagtcgcttgtccccgggggcggtcggcgggctggtatggtaaactctatcgtcccttGagggaacagattcgctGtggggcatatcagcccaggggtatgggcgcctgtttcccctcctgatctcaccccgattgcggtagcgcgcgcgcaaaggtgccacgagcttcgcggcgccactctccccccgcgccggacgaggtcgcccacaggtgctgctctaggtggatgattgtcccgggcccaggccgcggcgccatcatttgccgttctctatcctcgccccgtcctgtatgcaaccgtcccggaccttgcggggggtcacgttacccgttggtcaacggacgtcattctcttctagctttagggacagatagtgcGgggttcgagccggagcgcgcgggatgcatggccgcccttcgggtggcctcagcccccccgcgtgggtgcgctggcaaccccaagcaaacccggccgcgagaacggcatcggcgcggcgttgcgtcgccttctacgcaactcgcagaggcgggatAaatgccgctgaggcgctcgcagggacccctgcacccgacttcaaacgcctgacgatgccgccccaccacccgtgaccaaacctgcacgagccccgacggctaaaAtctcacggtacaggatggttagtcctcaggagttgcatgcgcatcggcttgcaGtggtgatcccgtcgccttcaaggccccgcagttggctggggcctcgcggcagccggctacaaccccggcacggcttggcgcgggtgcccacggccagttagaggttccccgtggcacgggatcggcgggggtccggggtcgcaggggccccagtcgcagcgcctgcaacggcccactgacgcgcagcccggtcgcgcggcgGgccgagtctaGttcgagcggcgggatggcgttacggacgggcgtcgccataccatcctgcggtgggaaaggtgccgccgggtgccgttctagccggaccggaggaaggccgccgggccccgacttaccggttgggggcactgtCcggggaacgctccacccatcatcaccaagttAattcctcggatcctcctgcggacggccgggccgcCaacgcgcccgaagtcgtccgccaacgagacgggtcgcggctatggaccggtctattgtgatccggtgattgaagaatcacaagagcggtaacgaacgcgaagcgggtttatcgcgcctcctctgctgcccccggacagttCgcctagccccggcccagccagccagttgaccgcAacgatgagctataagctcacggcggccctgacgacgagtcaatacggggtgttcggcgacccttgctcagcgtccCttgggcggccTagtaccagaactcttagcgcaacgcacacctcaacgccagggtgagggaaaagaccagagcacctcgcccgcgcagggtgcccgccgcggcactacggacagggggtgagctcaagaagtggctgtaggtgcggggcaggcgcgcggcactcccgagggatgctccgtgcgggggcagccgcggacggcttctgggtttcaaacatccaggcTtccgcttcaacccccacggccccgccagtcatagtcctcggggggggtagggcgctGGGGCttttgtgtcccgcggcaggtagagattcCccaccctaaagaggctctcgcccgccgatgcccgcagggagacaggcggcacaaaagtcatgtggcaagcgccGagggttgggccccttggagggcctgcgggcggggattgagcggcagatgacagatggccgattgatggggcgccgcggccagaaagggcgcgtaggggacgctgcgcgtcacccccgaaacgagatcagcgctgggcggcgcggttgccccggatcggggtggtcccttgggcttggcccagccggcagcggcgggcagggccacCcaggtacgggcactacagacgtaccctgcgatcccctcctccggtttcccccttcccatgacgcgatctgcgtcctgtctgcgccggcgcggggaggggtgtctcaccggagacccatggttcccccgctgtctcatggctatcgAaacgtcaaagtggcacCgctaatgagtagggaccgaggccccggcgagacaagcgggctggaagtcgatcgctgtaggcgtcgcgaggcccaggacccacatagggggggacAagctctgcgagtagcttcaggggggccAcagaggaggccttcaccgacggcggcgcggtcgggacatgaggtagaaagccacagggagactccgcaccggagggagtgcgggctggggtcgaaaggagcgggcgaggcacgaggggcctacccaaggggcgtgcgtttgcggtaacctaaaggcccgctacctggacggggtggagcggcgcggcggccccatacgtccgggtcgcggagagggagaaggcgaccgtaggcgttgtcccgcgacacgcctcaccgatccgaacgccccgggagagccgggttggacgcgttccccgtagcggccccgcgcgaggccgcccggtgaggggcgggacgcaacgactccggccgcgacccgggctgcaccttccgccgggcccctgccgaggtgggacgtgggtcttcgaagtgtacctgaaaTatcgcgagcggggcgctaggctgcggatccctccctcgcgatacccggccaagccccgtgcccgggtgggggtgggttatctgcgcggtgtctgcccgcccaggcgcgccgcgttaacgaacgggaggaccagcgcggaatcgtcgtttccgagcccgcacgcccagggagtgaccggcactgcggggggccgctggcgctcattcggccgatgcggcCcggcgcatagctccctgctatctactagtgatgtatggcccgccccggggggaggcgcggtgggtctTcgacgccgctttgccgccggataggggaaggaagacgccctgagaataactcaccgcaccccctccgggcggtcgagcgtgacgcgtgccagtcGcccgcacaggcagggcacggtcagaccaggttccgtggggaggggtcgggggtagaggccgatgcacgggGcgaccgcgtgaggttggaccgagtgaggttgagtcgtcgcgcgctcccggacgggcggcgcgcgccagtgctcgagtctagcctgtggggtactctgcgcagggttaattgcgctggcagcccagtcagttcgccttgagttatctgtcccctttcgcgatctcatgcggtgggcaattcgtctacggcccttcccaggctactgcacggcccatgctcgtttaggatctCcagccgcgccgggccgggagggtatgagccctggtgatgccgacatcccccgagatgctcatcccctcgtggcgccctggcaggtggacttgggatggccccatacgtacggacgactggctgctgcgggacatggtgccaatgggaccgctagtccggggggtatccccaatgccccGGgcacgcactttcgggcggtggcggttcgcgtgagcggggaaacgcaccagggaagctgtacccggggccggagtcgagcgaagccgctggccaagactgattGctccggcggtaacgcaacccctggttatctaCtcacggtgtgacccgagccgacccccaatTtctaacccgataatgcggtaggacgtttccggtaagggccgctttacggagAgttaggcttctcaccccgccgcattcccgataggggccccaggcccaaccgaccggcgccctcccgccCGcatcacaggggcagggggctggaacccctcggcgccccacggcgcccacaggcgtgtcagcatccgccctgaggcaaggcttcttgtgccagcgcaggcgtccacctacacgaaaggaggtctaatggtaggtccccgaatggtgagcgctggcggggctggggagtctcggcagcgcccgccccaccgcgcaggcgcgcttaccctccctggtagccCgatctgtccctgcacccagggtggtagcggctcacctcgcagggcccgggctatgcctcaccgaacggtcccgaagcctatcttccccgttgtggtgccgcctcgatcctcgaaccgcgtttagctctggacgctctgaggatcgaggcggcgcgtttaagaaaaacacctcgtgtacaatgtgtccccgccgcagagctatggaaacacgtggacagtccgagagttgcgggtctagcaggaggggcgccagcaggactgccacacagtcgcgatgtagtcagggaacagGcGccAtctcaCtgtgaccCaccgattgctcagcagcgctggaggcgccgccgccgcccacccggcccccccggaaccgggctcgacgaccattcttcgtgtgccgaccggtcgcttaccacgcgttTgtacacggtcactcctAttCcgctacacgaaaaatctagcaccaagctgggacgggCcgtgggggctggcccagctgtcccctcggttgttgCgaacgagtccgcggacgtctcggctagctcttcgcgttcgtctactatacatcacaagacaccatggcccttcgagagtcctgagggtgacgagcgcggccggcgcgtcccgtcccaacctgagtggagccccgtagagggTgacgggctggcacccaccccaaacgttcgtcctggcctgtagcccaagggttgatgagagggctctggcggcaggcggttgatcgcgtggctgcgcgtacgactctcttctacgctccaaagcAacattctgacagaggcctcggtgcagccgtcggctccgtaggaactcacccgtctcccgtgtccctgtgcgtcgctaagagagcccttttgctggccgctttgcctcgcctacaggcaggtggcggccgggggtgggacagggtccgccggaccccggtcccagtaggcctgaggtgggactcacctcgacccattcgAtcatggaaggacgctccgtttcactttactatcaagggcggatcgctaggctccggagagcctcgcgggggggcgtaggggcggggtccgaGtgggtcgatgagtgagcagccAccctctcgcgcgcttgggaggccgtgtctcatagggGggccaccatgagctcacgtgcaccccctgtctcgctttgcatccctggtacagccgcacttgggctcggcgaagcagtaccggtcgtaatgggctagctgacagtgaacgcctccctagtgccgcacaatagtTataacctcaacccgcaaCttgagagcgtgtaccagctcacgatgagtgaggacctgcaggtatagtctgacagtcgggtggactcgcggacggcggcattgtggcCgacctgatgctcccgcgtgctggcccagcgtgcactgccccggcggacctccgaccgcaccagtagagttcgggctaagcccccaatccttccactgtctgcaagacgcgcgcgcttggcgatacccggggggggagcgcaacggtccaagggcggcgggctgctgggccggcggcgcggcggggcacacgggggggcggctgagaccgtttcgtggctggccaggctgcagctcccaaagggcgtcagggggcatccccgggcgggagaggccgcgacttctgatagtgggtgccctatgctggtgaactatggccgttgctctgtcccagggcccaggatggcgggaggtacatgtgcagcaagcacgccggaccacgtcaggcgagagaggcgtagggaaacggcggggaggacgttttcgaggggggggccggtgctcgccacggggggctgaacaccagtgaaagtgcAatcccggCgTtgaccctctcgccgccgatgccgccaaaccccaaagattaGcctccctaaatcatcgtgggcacgcggtcgagcaaaggggcgggcttgtagctagactccagcctcgttcgcgtctcgttctcccttcgagggccttgccagggtccGccagaatcatctcctggctcctttgtagacggcgcttattgttcgcccggagttggcggaggacgggcaagtggcgtggccccctactagtcactgtgtagttcgccttacccactccgtcgctaacgccgctgggcgagtcggatgctgtggaggcagcaatacgggtctaaggcccactacacgaacccggaacggcacaggattgtgcgagatcgggccagccgccattcagccctatacaataatacccccgagggggggggggccgctaagaataggcgccaccgcggctcttggccgcacgcccgtccaatgtgTttacgtgttgcccgacccgtcccggttcttagtgaggcagccggacgaggtagacctcgagcgcgtgggcagggcgaaaatcggcataccatgggggaaacgaccagcagctgttgcccgaggggaggacatcaacgtagccggaatgccggggaggccgcgacgggcagaccgatgcccagcgcgtgaccaacacaatcttcggagagtctccagacccgctgattccgaaaccctcccCaatagccctcacgcagagttcatgctgagcgggctcgcctcaacagcacgtgggaacacgccgggcctagccgaacttgtatcgtggggccacgccgtcctaagcgccggcattcgctctcttttagcatcggagcctctacggcgcctcgtgctgcggcgtcgaccgctctgtttagtccgcacggggggatgcggcagcgcggtaagctccgttgcccgtgggcgctgttcagatacaactggcactttgacccgcggtcatgAtttggGGctgaggtcagcctcctcTagggcgccccggcgataaagatcccactagaacttgctgctagtattgttccctgctgggccaaaggcagcctccagagcacacatgcgactgtgaaaggtgagcggcgctgccgaggctgcccctcTacccggatgaagtcaaagcccgagcggggcggcccagcggtgcacgccggagcgctgagGatatatgcGgTcacgtgccgcacatgtcgctccgggcccggttgctcctcttcaagcgtCgcgctaccggccgggaccgggcggaacgatacctcccattagcggcccagCggcgggagccgcggtcggaacgccgCagtgatctAggtccgccacgttcgggcagctcgaaacctcttactttacaactccggaggcgtagcgattcaagggacCtctctagcgcgcctgcgcctttcccactatacgtggcagtcagcgggcaggcccgcttggctAcatgcgactccgttgaaacaccctcgtcagtccacgtcgggggccgacaacgccgctaaactcacagcctccctgaggctgctatgcacacttacctcgcaccgtctcgacgcctagattgTacccaacctggtacacctcggcccgtCctacgggcgcCggccgttggggggcccccccagCtcagtgccagcttcaggttccacgcagactttagcacccggatctgggagatggaagagtccacacgttacacatgaataaccctgatttgcgggtgttgtccaacgcgtccggcacattccgagccgccgcgcttcgcgggcctacggctcaaaactggaccgtgcgtggggagagccgtacccgccgcgtgcgcaccggggccgGtcaacgttcggggcgggggtgaGctagtgggtgaagagtcctcgcctcgcaggggggcacctctagcaacggccggcgcgccgcagatttcagtggacgtccccgccactgagaccagttactacggccttaccttctcggttgtctggcgcccccgccatCtgcgcgtcgcgatcttaacaccggctaagtcctgccaagaggtctaaggcaggcctaagtgggtccgcgggcttcactatagccgttcttcgctgcaggccgtcgtaggggaGccctcggcacCtcccgttgatcTgtgctgtctgacgacgaggcaatggctaacgaccgaactcctctggcaccccaagggtggtgcggcgcgatcaTtcgccatgtaacgcgtcctctccactgtcgcaggcgcgcttgccgaggtccgctgcggCcccAatgcgggcgagactcctgggcagggggccggaaaacatggcgatagcgccgtaaggcaagccgggtcagccaaacagcatagtagcgaacctagatacggtgagggaggggggggccgctcaccaaagcggcgagcggcggtgtggcggcgaccagccctgtttgcctagttttcaacactggcctcctggcggtggcaagacgccgcgcgcagcgtacatgcccaagtcatgcggaacataccgagctcgctcttttccctcagccgccctcggggtaggggccctccttgtacgtgctggcacgatgtcccggtatcgggtcGgcaacctcGctgggagattgacgAagcagatcgaGacgggccattccagctggtacccagccaatgagcctgcggcggggattctgccggtgaggccggAtgctatgtcgtcccggcccctcccacgtattggcccccgcaggcaatagggagtcccccctgccaccctaacatctttctactgcctcggcgacagtcgtCgcgtgagcggtcgcgacgccgtcaccatacagggagcggcttaacgggcacgtacgcgcccgtactacccgcggccgccagccggccacaggaagtgccgaaactccgcggtcctccgaggaacgcggcccgcggccccatggagggAgggggaaggggatgtcggcacGagtgccatggaggtgcgggactttgagtcctgacgcgcggctagctcctgatccgccggctggtcacgtggctgccaggtcacctcagatccggggGgtcctccagcaggcgcccaccccggtctcggagggcctcccgacggggccgcgctccggccgcggtagggtccgggcccccccccttacccgcccgataaggcacgctcccaaattcctggacccgtccgggcattatgcatagtcagcgctacactcccaacggggtgtgcggggcctctccgccgccccagtcgcaggagacgatgcaaaggatctgtcccggtcggccgtcgagcgaaacaaccgggggaatcgaaaagcgacggtcgcgggggcgccgccgaatgccgagcgcgattggcagacgaccggggtgaagttccggggtcgcgcaattactaaccccaagggatccccgggggccgagggccgcacggtggtcccagatttgtagCgttcgAtgcagcgggatacagcgcgggcggaatgcgtagcctgggtTttccccgCaacgggctggggtcgcGgtcgtgaGgcgggggcgccccgctccggaggggagcgtagagagtgaggctaagacctacgaaagagtgcccctggctagaggtaagagccttatgcctcgggtccggcgacgcatggcgtctgctgcacaggcggggcacgtgaaccgactaacagtttcccggctgattgcctcggcccaaacgctcgctcccacggtcggcctagtgaaccccaccctgtccgttcggacaattgcgcggacactgaacagtccagggactcgggccggtccgggtcggcaattggtttcCaagtcggtggcggcctagacctccggacgaccggAaagcgcgtctgctagagggcggggcgcggcggcggaagtgggtgtggcgaggaccacagtccctcaccgtcgaagcttcatcgtgtatgcgcctccgaactAagcgtaaatagcacagtctgtcctgtgagcccgcccggtccgcactcgccccctcgcgacccctctactgctacctctGgctcgaccTctaggccggtctcctagctcccgctcactagtcccggtctgtcgttggggtgggtcggggtgTcctgcgtgctggcgggtcgacccacctgcaggccgtatctgtgtctcgatcgcccgggcataggctggcgcccgagccgctatcacggctccatgccactatatcgggatggcccggggctcactatcattcacagagacccgcggctcaaggtatcgtcgttagtgtgcacgcgtcccgaggccgccggaTgctcagcgtctgagatccgggtcgcggggcctatatcgacgcgctgagagactagcagcgccccatcaacgaggcctgaagctttcgttgtcccacgtacttggcgtttagttattgggctggccccacaatagaagcctcataccgtggctgaacgcccctggtgctcctctccgcgtccatcctctcggggattctaccgcctcgttaccactgactcgacagacatggaacgaaaatggcctcgtatggcaccggtaggggcccgcatatgggcttctccccctgagcgtctgccccccccgcgagcggcctgacggaaaggcagggccatcgggaggcgggagctcggactcccctaggtatggccgagcgacccatgtgtttgcaccgagcaacaacagcgaaccgcgaggcggactcgtgggcgcgggccagccccgtcgccggggctgcagcagctcgggcgcggtagcctgcgctcctcgcgtcgatctacgacggtccgggttgagcgagacccaaaacgtggggtagaagtgtcaatagaagcacaccgtccccccatcgcaggggggttcacgggcctctagtcagaatcagaatgcctctgtgcaatggccggactcggcccgtggagtctcccctggcgcagtcgggaccgcgggtcccattccagctctttcgctaatcgcatgacgggaccgtttagggcggggggaaccgccaacagcgcccactaccagctagggtgagcgaacgaacagccgaggcgccccggctgtgggccgggagcgctagattttaggGccggaggactccgagcggtcggccactgtcatctcgcgacccgtacttgtggtagccttgggccgcccggaacggcctgaacacccgaccagtgtggacgctcgctcctgtcgcctatcccagccccgccgTcccggcccagcgggccacgttagctcccaCGgaccggccctgacaccgcgtcccatggcctgattgaattactcgtgggccgagtcgactgcgacgtgagctcgtaccccccctagttaggataccccggatgttacgcTgatgtgcgccataGtcgcgctatcgcagggtgcaggcagctgagacgtaggccActcccccaagaacggcgcctgCacgCcgGggcggcctcgggctacaccagtatgcctggccTcggctcaggccgcgctgcgacctcgggattcagggtgggcatgtccccgctagaccgggggacgcgtggatctaatgagtactgctcggctgagtcgaggcacaatcgggtacgcctgggcgtcggccaccgaacctctagagctggggtgAgtcctagcccgcggttaggtgcgatgtggtccatcacccccctggctattttatggggctcgcccatgcctcccagccgcgcttccgatgccggcccctccagcaggatggggtacgggtggcttacgcTgCgcgccgcgggtccgggcggtggggccgaGtgcgcgcgggtcccgtggtcccagctcccgggcggatcgtcctcctctctcacaaggcgtcccgagccggtggtcgccacgtgagcgctcTccactggccaaacctagcgtgctgccgtctgcgtcacgggatacaccgatcgaatgtttagacgtgccggcccgcctgttccgcgaggtccgctaaacgggccatgatgcggaggggcggttcggggcgctggccgagccacaaccaccatgcccctcaggccgggcggcgctccggggctcgccggcgggcgtgacgctgaccggaagaggccgaggcagggacaacggtgagagcgtctggagtgcggacggtaccggcatcgtagtaccttgaagcacagcccagatcacgacgcaactaagcggcgtgccgggtacacctgcgtatagtcctccgcacggagctcctggtgacgtggcagagctaagcagtaTcatcagcgtgaagacccggggagatataacccgcggtgagcaggattccaagttagcacagcagcgcgcctacgggtaggatgagatgccccccacGagtttgtcggtcgaggcctcacattcctcaatgggccgCgcggcgaggcggacgctccgtggcgccgtgagggatcaTcaaatCagtcagcccgttatcccctcttcctgtagaggccacgagccatcagagggcagGacgtaattgtgaaactggctgcgggggacagcacaccctaacctcggcgagccaacttcggaactgataggcattgccgtgtagggataaatagggggcgagggagggtccccgcgactaggcaatagcggaccggaccaatccttcgatggtgcggcgtcgcttggaggcctaactgtttGcggcactcaccatcggaagggcgccgtcttcgaagggcacacccccacgtctcgcagcatgcaAcctgttgtgttgaccggaggcgccgcccgtgccCgcgcggaggtgcgcgagcctgttctatagtccaaactggacagcaattcgctgcgtaactttcccagcgcctgcggggacgcggtccttcttgcctgGcgcAagctgtaatagggggccgaaaaatcccccaacggttgtgcctggttgaacatccaatgattctagcgcagatatgcaatccctttaaagc
>xvv702.filtered
TATCCagTCAACCCGcACCCCgctagtAggGCGGCtgCCCACACTACCGAGTcTtCTAgGgGCCcaacTcGcaccggTacaaAgcaCGgTgagtCtcCgtgGgGgGAccggccCCTCAGCccTACTCacCTAccATgAaGATcTgCTcAgTcGgtgGAgACacagACGCCATTTCTacGGtcTACaGTcAGGCgtTTCgtcGccGTgCGAGCGGGAtATACGGcGCCTCGTCTTGTTTCAtTTAtgTtaCggTgcCGccccccTTATTCcgaggTgcagCAcAcaGcgagGAcgGtCGcTTCGGACgATATGAGTAGcgcGACcTGCATAGAGgGgCCgcggAAcACgtTGAGAggActTGGATGAGAACgAgCcagGgTTgAGGGtcaTTATgAtgtAACTAAgcCGGTAgGTTTcACcgTCTGcgCGATGGAGaAATAGTGCGATTGTTGtAATATGCGcTACGGCTTTTgAGGAGTGGGCTgCTATgTGACAGGGCCTAAcGGTTTAGAAAGCTAGAGAGCCACAGTTTACATTAAcTAaaTTGgAGGCCTCTAAAGGTATAACCTCGTgGGTGGgAGCATAAAGTGTTACTCCTGGAGATTATCGGTCTGTTTACGTTTGTATTCCCGCAAGCCCGCgTACCgGGCTACCCcATTGcGAgtgcgcgcgCTCAAGcCATCgTTgtcgtcgAACTcaGAGgGcGCCTAAcagGGAagTgGTgTaccggGCCCTGtcTgcCGGCTAcTATgTcAtagcgcgcaGAGAATgTCAGCAAAcCGCTTtaAcCcgCTGCGGcTgggGGTCGGAgtGgACgGTcCCGTTTCTGAAGTTATCAATGaGcCTGAACcCTCACGAgTCGTTccAATCCgTTGTAtgcTTTACgAgGgGTTCTACgTGcgGTAGGcACcTTgCcgGcTaGGTAGCTAgATCTGTgTACCGGAgTGAGGATcTTCTATcACTcACTATCAcGGAAAAATGGCTTCCCCAtcCcGCGcccGcCGagcacgGgcAcgAagccCgacaaaaacaactaggccCTagacgcatccgaccggCactcttgGgagtgcccccTccCcgcTtggCcgccCcCgcCcTccccgctagcgccCTcgCaTATCCagcTttggcggttcgcgcgcctcgaaaGgGAGgCAtTccgcgtcGctgtgcgtgaCaaGCCGcgtAgcttgCtcGtcgGtaGCGTgtCAATCCtggCaCATCGgTAcTCaCcCTTTgCCTCTGaATATGCCATTCCCCGACTTGGGGGGCTTTGGCCTTCTTAACGGGTTCTTTGTGCTTgATGTATTTCTGTTCCACAcAGACATCTGTACacCcgacccctggtgtccggagccTacGgttgGtTAttggccGcTAaCctACCCGTTAGCCGGTGTcCTTCGCCGGCggcGCCTAGGAAccACAAGGGcCCcGCGaaagAggcGATCgcgTCACCACATgAAgACTCTGAGTGGGGGCAATATCTAgCATCGgCCAAACCCAGAAgtAGgatTGggGtctTgcccAAccCgCCctaAcGccTcTgtCcacccAAggTCAAcCAAcgaccGtgtgcccAaCccggGagTGGaTtcTCtaTCcTtAccgCtTggaACagttcGTAcACCGTAcgccCccggggTGgTcATtcACcaggTTGCGCAGccgTTCTccTgGGTCCAgCATTATTCTTAGTCCGCgAGCGTTTggcaaaGggGcagcTACTaatTAcCCCGaAaTCcGTTGgAAaAgTacgAATCTTgTcGGccCTCGTGtTAaagcccaccgcagcgactcttGAATcCGGcGggggtggtgtcggatgcgtggcgccgtgcAGggggttggtggCtaGCtcgacctacactCCTgCGcttTCACgTtAccGCcgCagcccATgCggGTGCgcgccATCATaTgctgGgGACTGgCtAATggtccGAAcTGTcTTcTACgGCCGGTATGCgtaaGGGTCtATCCTAGgTAcGGGtGTgGTggACCTgTCcTGTCGcAATAATGcccggGTgAAtgCCCAGGcTGGTgCGACCATGCtCGCCAGACTGGcTGAcTCCTAATtCcaTTACCTCAaGATTGTTCTGcAGTCCCGACCgAcCTGaGgAGCCcAaGTCGTTCcaAGTGTCAGCCGGTGCCGCCCATCAGCCTTTTGGACTAAACATAGGGGTGCAACTCAGTAGAGAACGAGGATCTATGGGCGGGCTTAATCggcccgagAttgaAccCAgggaGaCgAcacgGgggCacCgccccagacacGTttTCGCgGTaagGgctTAGCTAAATGTtccTcCACTccTcAATATAACGCCCGTTAAGgGCtTCCTATTTTTTTCCTAATTGTCGTGGCCTTTTATGTTGACGCCCACGCCTTCATTGACTGCAAGTCCCAgGAGTtAcgggAgcaaTAtCccagaccaACTAAAAGAGCCGGctCTCgacatacccCcgtggccgcgtcCTggTGTgcATTAGTACGtCcACAAggTTTCTCTAAGCACAATTGGGCACCCATTTAcTAATAATCGGGCGCTATAGGGCGACAcgTGgCTgCAGcCCATTTGTcGGCAggGCtTaTAAGcGtCTcCcgccGgggGCCGTGCCGAATTcGcTCCGGACCGTAgTgTGATCTACCgAAAAtcccTGTAGCGGTGCAAAcAagTCTCaggtgAgAacATTcagAAACATcgcggATcccGaccgaagCGgcaAggcgTgtgcggggttcacagagcTgttgggtggccgctGtggcgtacccccgccggtccaccattGagACcgAtcgccAccGgctaTggggGcggggcaccTCgCgccCttcctcTcgcatTAaactatAttgcAGGATCaGGtACAtgcgGCCgCtcatcTAAGGcgTCCGGTAgCCAAATGTGAATCTTCGAGACATATCgCTCTAGAAGATACAGCGTTCCGCAGGTCTGCCcggGgcGcGgtGgcTcGCAgTagccgcgcgcctacttacAgggggggTcggagacggcttTCtAAGgcagTcggAgTtaagtaggCATTgATaGcCcCTgcAtCcCTggttgtcttcATAaCAGgAagAGGTAATGAcTCGTATTAcCTCCCGTCAGAAGAAAAATGcTcTGGCCCTTCgggTATTCTGTCTAGTAgTTATtAcAGGGAGAtggctATAGactAATaCggAGaGTCCACGACCAGAcGAGGCTGGCCACTGCGGCTTGAGATATACGGCACGGGTGGAACTGGTTATCTCACGAAGGCTCCATGAgcCCGATCTAAgCGAgaCcCGATccATGGTccttaggttAgagcgggctGgTGGTTcgCcAgAGATCGgcAGccgTcGGAgTggggccccgaccgggCTGgTGGTTCTGAGCGCGTTCCGGACGTaGATCGTCGGTTTTAGTTGTTCCGTTGCTGCcCTGCGtGGTCcGcGgCCtCAtATcCGGCTCGATAGGGtTCGgCTcggTCCCGTTCCTTTTAAGTCAaCGTCCCTACGTCTgATAGCcTACTTATTGTCGGGCTCTCGAGgCGCCCCTcTCATGTTTTCGAATCTATTGCGATTATCCAGACGGCGCCgCTCTTACGACGTTTCACTTCGTCATCgCATGTTcccATAgCTCACCGGTAggCGAcCaaATAcGtcacgagccCCtgtcAAcacCACCAgTGGCTAACgAcATGAATcCTCcgaGAtCCggtttGCACacAGGCctACtgATcgcCTTTACtaTAGgaCgTCCTACccTggtGCcAtgCGAGAtGCGaGcTcCtGgcCtacgcGgTttgCacccgCCTAgCTcGCTCGCGTCcATAgAcAcCGGCTCTGAGCCCGcTTAGGCATAAGGTCCTGgGATgcCTGaGcCTcATTTGGCGTacgaGCTAATTtATATGGGATAAGTCCCGTCAGCGCGTTAtCtCTCaGACAcCATcGGgTGTACCcGGACcTTCGTcgcCAATGCCGTtgTAgCacgcCAtTcTGGGAgAcGActcccgGgAgCAgCTTCCATTTTCGggCTaTCCCATAGATTAgcTGTATACgCgCTAcCcTAggAAGTTATGACGATGgTCCCgcCTTTAGGCGTGCccCCTcaaTCCAGTGAgCGgCTTgcAAGGTACATTCTgAGggAAgACCCGTTcCTTATGACgcCGccTgGGtgtCacagtaaatttgttcgtttacattcgggaccggagtattgcctgagacggggCttgacaaggagacgttCGcatacccaatcAcccTacggcgAAAgTCaGTCgaGGgCgGAGACTAGCTGcGAAGTTTTcTTCGggccgaTggggCcgAAgCTTGGCTGGGTAcAGcCAgAAggCccGGTATTCTTAAAAAAACGGAGGGAATgGGGGCCGATTAGgTGGtGTCCcGATTGCCCcTCggAGGCgGGgAGGAaGCgaATACAACGgAGTGTGAaCCACaGCggcCGCagggggAGCGGcgAgGCggTCTAGaccctgTcggcttaCgaagtgAaGgcaacgacTgcAcTCCAgAAGCGgcctTGGTATCGTCcGTCTCTGAGCTTACTGATGGCAATTcGATgtcaCgGcCagTgccgCTAggGGGAAcGaAcGCGGGAcTATTGggAtCCAgTcAcTcCattgAAAAGatCCACTggcGcACTTGGgcgtccGTCGcgTAaaCTGgtCgaatccGcctaaaagtGgTctacCCTcCcgagGgagAGTGCTccggGTtgcggaggtcgaGtAgtcctaccccgcgaTaccgTAcCTaacggcagctaGtTCAaGAGCgcgAagAcatCCgccgggtAGccAATTAGGGCTTctgAagTACGTgcCACcAAcTCcCCAcAgCCgAAATcTgGTAcgtTGGGTGTTATAGGgGAgaTATgAcgggcAcctagcCccCcgaggagggtGgcgggcccttgAgaGtcggcAccTTccGccagcgccttaCtgtCggGcAcgTcgcggcctgtATcCgcCGACGcGcGCTggTGCTccGCTTAGTGgGgtCACCGAAAAATGCCCgTCAGTCCtgGAgGggGGGAtgTCATGAcggTGGCAgAgcTAGTCTtGTTgGcGATGTCTTTgAGGAtGTGTGGTTGCGCAATCAATTGCACGCCccAtcGtGgCAgTtGtcgtgcgctgcgggcccctggctgcAggtCaCcgTcAgagggcGGTAATGGAgCcATgGTTCTGGTTcGcGGGGGCCcAtCgGgATAAGAgcgcggaggccGgccggggCTtctgAcccgcggtTcaGGgAGCAgTcCGTGAcgaCGTGCgggtcccgCtCGTAGGcCCcCCGACTGCCctGTCaCaATAtTCGACTTTcCgCTCGCAATCTCaTCTgAggACGaccCTTgATCGcCCCTAGCGgcGgTATcTccgaCgtCcTAgGCAGcTAcGAAcGTGTCGCTAggGTCGCTAGGACGGtTACCgcAATATcAACGcTTcCagcaAaacccGcTGACTTGCAGGGgAATCAATCCGcCATtAAgATAAcAGCCTGGccGgACgaagGGcACTAGgTGCTCGcCGCatcctGGActgaTGagTTCTAGAcGTGCTGGATATCTTcAACTCTACGCTATAGccCTCcCTGGtAGATGCGtcCCAGcgTCTGTTcCAGgAcGcttgGTgaccgcgggAAtCGTTTTCCTATTATTGTGTGCCTCACCGTACaGTCtTACCaTAGTGCcgtgCgCcgATgCggggCTGATgagagcgggGgagccCCgGCCCGAgGcGATATTgAgAAAGAAgGCgGAAATCGGGGAgGGCTGGGGCTCCGCCcGAGACAGGCAAGCGGTTAGAGCATGTGGAAATTTATGGAATGTTATtGAGCGtAGCACTCATgTAcgctCggccaTtataacgcGtgTggcGGTgagacccGttGccctgggaacGGCCgAgAAAAAgGAgTtggcgtTagCtTTgGacctagcAAgAcCtGcctCgGcgAGTAggCATcTAAcctTTAAACTACggaACTCccCtACGgcAgTcCTAGTCGCCACAACATTTGAGCGGGCATAGCgGccGGGATAaGgTGCGtgaGtTGCGGgCCcggTCtggTTgtcAaacTCaGgTGtAGagGTccTGtcCTATCTTAGGGACtCTAAgtTAcggTagcTTCTCGgtacctCTgcccttctggGtAATTTTaaTcAgATTGgcCcTTCcTTTAcCcctcAgcGCTGGagCgACcAcTacatactAaggCCcgcGTggCgTCGACTGcTCCACccTAGCTACACgTTCcGgGtctgAcAcccCACgAGGAgccAtGAGTcCTGCtTaccTcAcaGcAAGTTTTTGTgGGTACaTTcGGATCTTTACCTGcTACTACTCCAACcAGAAAATGCTgAtAtaGGTCcAgTtcggTTCcGTCCGCcAtGGAgcaAgAATGggtaagcgCgTTGggGCcTAGTTgAGCCCgcCTCAGCTggggcttGgGTCTAgcCCCTTcTcagcgCgGAcCCGccAatcTgAcCTTAtcgcACGACTTATTtTGcgcgTgTTTGgAATTTCgTTCgctccggggGaatttTgggCaggggcgGgcccCtcGGGgtgTgccccTTgAtCtggCcgTgCGGCACGAcTCCCTCtCctCaACGcTCTgcACTTcACgatgCTCTGAGTcAAAATCGGaACcAgtTTCTgcgAAAATGTAGCgAcTGgGCTTCAGtTCGATGgGCcGTAAAGttCcGGTGCTGAAGGTGTGGgAcACTCGCAaAAGGcGCCGggcTTGCCcAGTgCACCGCTCTAcATcCTGACTCaCTgccCATTcAgTgcCagggaCGcGCaatgtcgggtCTcTCAtGcCGACTGATTgATTAGTTccCTaACGGTAgGgCTaCaTTAcCgTGaGacgAccTTgTTcgCaTGCTaggtaatcagcggaggcGgccCCTTAcCCccaTAAGCctCgTgtcgCAgcaGTGcgctcTtgGTTAgcTACgAggcGCcGTAgTGgGACTTTTCCCGTAgatggAcgAcGCTGATACCAtCTCgggCGcgCcCTGGcaCGCCTTGgTGGgGCGtgcggaaAAaGgCCCagcgCagaccaagtaaTActgAcgcCgCCCTATGGCGCTTCCGTAGaAGcATAggtgtCTTGGgtcgagacttcaccaatggtcatcgCctgcactTgGaAattgaTCaGgggccgGacaTTGCGGcCGTatCCCGCCGCTCcCGTCAGTAACTAAcgTCAcaAGAATTGCTCggcgAttcTgaaCCCTTTgcCTggATTTtGCAcCgcGTgggcgTGTgGcgtCGcCaTaAGgcacagGCgCtGgTagTaTGAGTtccGAgCCGGGTAAATCaacTGTTCTTTTTcgaCgTTCTATAGCCGGCATggtcgCGCAAtcCGAAGGTtTgCgtggGaATccTgTTCtcTTGTAGGGtTATGCAAACTTACcGCCtGgACGTcCCcTTtcaGTTCAAATGACCAAATcAcTGCAaCAcACaCCGCTCCCAAGAATGCACATgTgCcAGCTAAGCTCCggTcggGGatggcgctcggtccgccATcaAtAGTGCACTTTACTGTGAGTGGAGACGGTACAAATCGgATcGAAAATgACCTTgTGTTCCATCGAAATTTGATGAGAAcGATCATTTTCTCGTTTCTAGTCGCCTCCgCCTCTGACCCCATACCCTTTCTCCGCTGCTAGGAAGGGGCTTcACTGgATCtTGGGCtCcgTCGTTGATcTCTgGGAGcCgcGgGAcGcgTgACCTCTTAGAGAGAAGAAGgTGTCTAGCgCTcgggccaaTtcaTAAACGAcCAAttgcTCCACgtAATTTAAGTCGCtGGgTATGTATGCaTATGCgATAgGcgggCGGAATGCcgcGgGCcgggcgcccaaagcGTCtATggcTATccAagCgaactgTccCTCTccccAgCagcgcccagCAGgcgaacTgTaggcggggagcaCgctcTTTgAgTccCgcagcgCCGATCGTCTgGACCGGTGGGCAGATCGGGTAGGCATCGAGTGCAATTCCAACATAGAAcGATGAATCTATcCTATCGAAgTGCGCAGCCGGTATTTCTTTATAATCTAAGGCTCGAGACTAcGcTGTTTTGATGTGGGCGTTAAACGTGCCAAAAAGAAAGCCCcAGCTGCTCGGGTTCCTGTACTCCTGGATGTgcgGcgTGGGATGgTTTAggAACGTCTTcCTCTACAGcAACTGGACCCtTACGGtgtttggcTGTCAGCAGGAGCGGTATCGAgCgccggTgtcgtcaGaTGATCTGTTtTTCGAATGACGAGACACCCgGaAcgcGggcCGcaAccGGcgcgcgccgCgTcTagcTAttTCtATATCTGAcgCgAcACGTCGGAGGCTCaAATGTCAGACACGACgTgTTCGGGTAtCcTAtGCcctCtggggGCAgCCtTTCaATGAcACCcccgcaGgtGCGGTTTAGgAcGaTAGGAAgTGGCACATCTGATctaacCATCcCTCTGTGCCCGAAACGGTGTTCAGTTCTATATGCCCTACGCGACCCCAGGTCTTcATACCAGCACATGCTGcCGAATAGTGCGAAGcGTAAAGGTGTGAcTTTCTATACtCCCTgAtcagatAcTggGcgccGGTTCCTgttctgattAcAGAGaATACACGTgGcAgCCTGCCTCCGGTcATAGgATTCCGGTCCCCGTTCATGTTGGTTCTTCGCTGGGAGCTTCTGGCGcAcTAACTGCGAGGAGCGggCGCGGTGTCCGCCTGTCTGGGGTGGAAAGTGAGCGATAcATATATAgGCATGGgAGTTTgGGgGgAGAgaCATCGGcGAgaCgGcCgCGcCAAGcGTTGCTgTTAGAGACcGCCGGAGAGCGCTGTcaaatAAGCCAgGgAccATgGtcaaCcgtcgtCggggaGcCGGtcTggGCCtacgACGaAacTTTTaACTCccgAACgcCgCAGGTcGGcgaGgggggAcgTcCCCGACTaGAGTAAgTCATgGtTAACCGTcGAGCGTCAGAtAAcCGAcTTAgaTttcCcggtAgaagttACAccttccATTcGcAtTcacacCgTcgtggacCCTGcGAGCGAgGTgCggggCTTTTaTcccGCcATTgcgCTgacgtaAgGCAGAgAGTAGTCGcGTTACCcATCgTAggCGGcTTGcAaTCtAcCGCcaGgGAgCtTggGACGACAGcGtTAgCTtTAACaAgTTCAGGAGcCtTTGAAAcaCCTCCCgTGGACAAgAcAggCCAAGTTCCTGACcCTTATTACCCCGGACcgACGgCCgCCgCcTTGTCGggggGTgAcACCACgTCAACTAAGcAgGGCTggCCAGGATCccACAACGACAGGCGTGGCAAATTGgTATCAGGAGgGGCagAGacGGCCGAagGCCgGcgGGCcATGCCaCATCGGCGATGTCaGGGTaATCGctcGGTcctgctgGATccgtgggtgAGCCCgGTATTTaGCcTGgcTAGTACGcCcCTgAcACcGcAacTtatCActTCaGTGCACGCACACCGCcAGGGgATCTgcAAAgTtTTGATCTCAAGCCCTGGGtCCCCGcGGtTGGAATGTATTGTATGCCGAATGATTTTTCGGTAATCCAagAACCgGAGCgACcCcTTAcGgTaGtGcCCaAacTCCAGTcCGTTtCACTgctcATtAAaCgcaggAGAGCTCAcTCcgTGAccggGCAGGGAATCCcGTGTACTTTAAAgTCTgCGATCTGTAGGTTCCGCATTCACGTCAACGCCCGTGTTGTTcTACTCTTTcAGCATAATGATGTTCCAGTAAAGTCGgcTTCCGcGTTATGcTgTAAgGAATGTTGTTCCGCCTCATTATTTCgCACACATTCTGTTGCCGGCgCgCGAAgGGcTCgTGcgcGTaGTggAGGTTCCTTgATATTTTtCAGgtgTCggcAACaAATTTTTGccCcTTTGTTCgggAgtcgTcgACTGGgGTGGCCACGTTTGACGAGTTAAATCCCTTAGTGTCTGcGTAAggGgGGCCATcACgGTcCcCCAtTGACcTTTACGtCCgctaGGGATACAcTCGGCgGGGAGCCcCACtGgGAgATGCcataCAtgtatcGGTTGcGAATGCtcTCTGACCgTTGcTCCGAATACTCCtctcACCACTGCTTACtcgaaccgggTcTGTCCGGCGGGTTTGTAAAGTTGCATctTTATCacAacgcGCTCCAATTAGTATAGAtcAAGCCCATGcCTgATTggCTAgcgAAcGTACGCAgGTaacGcAGCGAtccTCtGaAAgGGcGTGCtGAcGGCAgAATGCatcagcccaggAgCatgggcgcctgtCtccTTCTGCCGCGCTGccGTCCGCAcAgCCTACGCGCGATGGGAAGCGGGcTGCGACTAcAATAGGGTCcCccTcATAcATTACGTgGggCTAcGcCcGCgAATGCACACGTAGAAGCAGCCACGTcACAGTTGAATcAcAgcgTcGtcaCGGATGgCATCTCGCcTCTAGATTACTTCACGCATGGTTACTTAAAGTTCtgTCgCCAACAGTCCCGccTCCGTgCGCGTAAGGACTGCCTCTCCcCGATCCCGACTGTGAGCCTCTcGgAACCcAGgATggagcgcATCgTGtAcGCgATTAAcctCcCACtgATcGTGgTTTccccTGACAACCCTgTCAgcCCccGcGGTcCGGcccggccgcAagaacAgcGCcggTATTATCCCTTACTCTTCCGCGTAAaGACGAcGAaAATATAGCgGGtAGTAGCACACGCTCATAGCAAacATcGATGcTTTTTCtcGGGTTcGCAacgCtAccAccccGTTGTcTAtgGccaaacctCTCTgaAcTccCacAgctaaactTCTCTAgtacaggGGggtCCCCccGTGACGCGCgcGtgcgGaGTCATCCAcGGtATtgGCcTcCCTTTACCTaGgAccTTCTGCCCgATCCCgCcAGTTTAAGGAGTACTGGGGCTGTTAATGTCATGCACTAGATACATAGGGCAATGACCaAGACCCTGTGCGCATCAATAGCAACTCCATACGGAAAAtcgGaCTgATcTcCgAGgGCCcgcctgcaaTTTTTTGTtCacAGCGGATTTggCTAcgcTgcAGAccgagtctaattcgGgcgCcgggCCggcgttacggGTgggcgtcAccatGccCtTTCgcAgGgTgGaaCgtAGTgGTggCtgccgCCTtGCcTgAaAAAgaTgaaAATGAGGggATGGTCGACCGGTCACCTATAgTGTAgCCGCCTCGGGATCTTGTTTGCTGAACTTGaTCCgaCGcctGAAGCATCTcGATgCGGgTATTgAGAAAgGacgcgGTcgaCTGTACcAATTGCcgagCTgggtcgcgCctaGAAGTcAAGGGCGGACAGATGAAACGCCCGGAGGtTCGGCgCAcgCAaCTgCCTATCCaCTAgACGtatcgcgcGGGcGcGgctgcccTcggacGAtGCTTTCGgcGTTCATGcaAGcaATAGgttgaTcgTAGcCCCTGAcCGCCGAcCTGTgAcAgcTctAGTgGcAGACTaCCCcAAAAGgCAcAgTTCTGGCCAGCGGCTCCGGCCtAACTAgTTTaCtaccagaactctGaAcCcGGcgcacGcctcaacgccagggtgagggGaGCCCTcGgGAcCGTCGATGTgcgcagAgtATTTgccATACTCTCacgAacagTgggCgagcCGGGTGCCCCCGCACGACCCGgAggcCAgcgcgcggcGTCTcGAGCAgCGCcGcTTCCcggAgAcGTcTgACgacgCctCACAATCCCAGaacatTTGAATctcTCGCCTCGccTcTGcggccccgccGgtcaGagtcctTCgAgggTgtagggGgcCGaattCCCCCGgtGTTgTgAcaATCGAaAGCtcCTTGTTTCGGaTCCAGCTCTCATGTAcCGGgcccgcagggagGcGAAATCAGGCCGCTCAGCTACAACCCAATGGGgggCGTCTGcTGCGATagggcTCTcgggcggAAGtCAaAcggTGgGCgGAGAGGgAcGAGCCAGtATAAcgcTTTAATTGAaaGATATATTGGAAggGGAGtAcgGTCTGTTTGAAGCGGAGCGCTGAAAGCACAACAGATAACGCTGTTAAGCTACCACAgGGTctCATAGGCAAccTCgGTTAAaATgTAgACcCgTAGcacCGGAACGGAggcCTCGACCGAACCAATCTTACCTATACTTGTTTTCCCTGTATGCGGGaATGcAAACCTGgTgCATCCCACAGCGTACGAAAAgAGTgAgCTCcCTGATggGAGccTCCCACCAGATcATCgCTCcGCCTTCGCTCcGGTAGTGGGTCAAGGTCTGCGCGAagCGACTCGGTCATAGATACTACCTTaGCTATAAtggCGgtcgCtcgTtTCaAAcCCGgTgaACATcCAAGTTAGTGtaCgCAgAgGTACCTCcCTTTCACGgGttcGggTTTgGcgcCAaTAGAATTCtTaTTgGGgTGAAcTcgACTTAAaTGCCCCAGGAGGGAcTGTGAAAGAGTCTTATGcGCCGAAgGACAGAAATCAACCCcAGGGCAGgGACCTCGAATGGAGAAgAGcGGcccaagAggcgCAGgCCGgcTgtaacTtaCGggTccTctCcctAAaTTAAACggaAcAAcgcggcAgTGccGCGcTtcTgggGTAcgAaAGgAgagaGCgcgGccgtagTTgttAtAcTTTgaTacATGCTGTcgGCGcgGCTCccTTAAAGATATTAAgGGCCGAgTgCCTTTGgCGCTATTcGcCAgTCaggccgTccCCtTagCggcggTGTATGGTgactccATTTCcAGTTGgAgGCCTCTACCTcgccgggcccctgccgGggtTAAGTACCCCtctCcgGagtgtGAGCCGaagCtTgGgagTAggAcgcGGgTcAgcAAaCccctcGGtcgcACCaAcGggccCaAcccGgtCGGAgggtgggggtgCgttatctgcgcggtgCGCgGTcCGccaggcgcCcAAcgCCGaTgaacATgCAgaccagcgcCTaatTgtcgtttccAagcccgTaGgTccagggagtgaccAgTaAtgcggATgCccgctggcgctTGttcggTcgatgcTATCTggTCTCCGgcCTccCgGCGCTCGGGGgGAaGACGCTAAGTgTGATAAAAATGAAcAGAgCAAgGTCcGgGACGGTTCtCATGCcGAgGCGACAAGGCAGCACTgGAAGAGAGCtaactTGTTATGTATGGCTAAAAAAACTATATAGCGTgGACATcGACTGATTAGGcGAAGCCAATGTAACGaTCGGCCAGGGTAGTTAAGAAAACTTAAAAGaAGAgTGgaCgTCGAAAGcgGTGAcCtAaAACCAAGTTCCgCgaggttgGTCTCCTgTTcAGtTTcCAGGAAAGCAcAATTCcTagCgcAcgGTCTGCAAAGgCATAACCACAGgcgcaCATCGGGCCAcTTCggAGCTccGgCAGAtCTTAcCCgGAGCGGTGACGAAACGCAATgGtcCTGtATAgGAAAGGaCCTAtctacggcccttcTcCTgTGactATCTggcccGCAACTCtCtagAGCTGtGGCGACTTcTAggcAAAgGgggGCGCGAcccAATtTGCAccgacGGcccTcgaCGCgAtcGGTAcGGTTCACAAGATCCCTagCCAAGGGtTAAGCggcTcTatGTCtaTggGcgaACACGCCTCgGAAgGTCtAAGgcGGaCgCAacGgTCCTtccggggggtaAcTTcCGGATTGTGGTGTTTAGcCCATACAcAgCAAGggttcAcACgGAGgAAAGGGGAcGcAGCAgCagcCgCGcTcgAATTTAgaCCAAGTGCGGAcTgTCgTccGGAGctCatGGACTGTTcCgCaGTATGGGGTTCTCCCGCTCGCCGGTgACTtgGTTcgaTcGgacGccTGGCcCGtGTTcTTCCaatTACgAaAgacgttCGTAACaCAAATTAACCCGTAAGggAGCGAAcCATCGGTGGGATGATGCCGTTACCGAgATAcTAGAATcTCGTTAGTTAATAGTctccTAGTCGTGCcacagTCgcaggAgCcCggaCTTTTCTTCTAGcAcacCATATTGGcaAgATtgGAagAatccgccTCAGAgcGGgAcCCACCACCATGAcAAGAgcAGTcGcctacaGAGGGACGAACTGCGCACCGTCCTcTTTGGCAACTGATATtATcAACAGCgAAgGTCTCACCTGCTATGGATTGGCGTCcCGGgCGATAGCCGTTTCAGGCCgGCATTCgCGcCCtccctgcaccTGACACCAACATAATtcGTTCTCTaAAAcccgCCGCCCATctcGcTgaGACgCccTgGagTTCGCTCCTAcGCCCgGCTtgcGgccCTACCTctcgGCTTCTACCGagctcGCgGGgGtAtgaggatcgGgAcATGATCCCACagaaGaaAGTcCTACgAaTGTCACCCGGTcTccgcagGgctCCCgCCCcCTACCTacGCGccAGATACCATggAtTCGgcCggGggggcgcTGCGCAAGTCAccTTGTGACGATAGCAAagtcaTgAGacaAGcacTAGcCcaCCgtgGccCacGCaCCATCGagGGAGTTCACGACTAATCcAATTATGGGGTTATGTGGTTGATCCGGATTTCTAGTTGTTGCCGttcgCTCgccAGTTggtcAcCCCTTGcgTgttggtaTaACAGGGcCccGcCCCTgctGAacgCaGCCCACaAcGTTCCCTCAACacAAgCTCCAAATAGCCATTTGgctgGGTAcCTgCGCgttgtgaaTCGCCTTCTgCaAgtctcggctCATCTCCTAcACCTACAGTTCTCTTCCTGTGCCGTGTcCtggGccttcgagGgtccCAGTggGgacgGATATggccgCGTcAAGGcgCcTcTCcctTaAtCCGTTGTGAtGCGAAATAGTTCAcCAATacGGGcGccGGaTACCGACAcCAAATtgtCATcGaagggtCCGCAGAGACCTCTCgAGAATGACTAACCAGCGgcCCgCcCTcTcCGCTAGTCcCACCAAGTgTCcTaaaAAcaGGGCGtTGGaAGAgTGCGACCATCCcACCACCGGTGACGTTTCTCTCTTTCCTCGccACACTTTCACCGCCTATtGGCCTCATTTCCGCActCATGATCCCgGGGTgcTCCTGAgcaATCACcggccgggggtgggacagggCATAGTTACTTGTACGTTTGCCCCATTCAGACCCAAGACTTTTGGgGTTTGCCAggtcGCggaaAAGGAGGGcgtCCcCTtGCGGGGGGCaggATggatcgctGACTGccgAagaATTCcgcggTggAAcAtagCggcgCgCtccgGGtgggAcgatgagCgGgcagcccccctctATcgcgcCtCggaCgccACgtctcataCCTGggcTaccGCgGAcCTCcACTcaccccctgtctcgGCCtgcGtccTCgAtGcagccgTGctACTgcCTCCGgGGAcaTtaccgAtcAACatgggcAGTTAAGcaACCTGATcctcccCGgtgTcgcCTGCCGgGcaCCGTGGTGGGTTATGaCCAgagagcgtgtaccagctAaTgGtATACAGgTTGTCAAGAgtaGGAtTCgCcagCTAAACTAactTgcggaTgCTggcattgtggcCgaTcCgatCcCATcgcACgctggcTTGgTCCgTacGAGTAcATTAAGGcCTcAGTAAcaccaTCGgGAtCTggCcCaagccGGTaGtTTGCccGcGgtctgTaagaGgcgcgcCTCGCgcACtGcTcgTCgggggCAGgcaGcggtccaagggcTAcgTCctgctgAgcTgCTggcgcggcAgggTTcCcggAAggAcggTtgagaccgtttcgtggctggccaggctgcTgcCTTTaCCggTGCCcagggAgcatccccgggcggAaCaggccgAACTAGcCAGCGCCgggtCcccCatgctgCtgaactatggccgttTctTtgtcccagggcccaggatggAgAgaAgtacatgCgcaTcGTgTCTgAcTAGATCAACTaAgTAGgagCggcgtagggaaGGggcgggCGCCTcTCtACGCGgAATgAAATGggtATCTATTGTACCTTCcCgGaGaGATgGTGCaCCgTcCtGcGAgCAcCAGGTTCGCTAATATTCCtCAGCTAaGacATcGGGTatCaGcctAGcCGCGCGCtGACAAATGGCTTACTCGATGGGTCAAGgATGACACGgctGgactccaAcTGcCCtcgTgCcCcgGGTCTcTtCcACgACcTGGAAGGAAgCTTGTcCAGaCTGCGCTTGggTtccGttgtagGcggcgTCCGCtgCGcgTTcggagttggcgAaggaTggATaaCGCCcTtggccccctaGGagtTactACCtGACCcgTctAacTTGcCcTACTATtaacgccgctgggcgagtcggaGActgtAgagTTaCcTCCGTgAgtcGaGgATTTGctGcaTgaacccAgaacggGCTGCgGttgtgcgagatcgggccagccgccattcagccctatacaataaGacGcccgaCggggggggggccgctaagaataAgcgATGGTCTACGGctCggccgcTTATTTgAcTaCtTtAcGtacgtAttgcccgGGTcgATAcTAtGAGCagtgaggcagcGCgacgaCgtagacctcgagcgcgtgggcagggcgaaaatcAgcataccatgggggCaacgaccagcagTtgGCATGcgTACAACggacatcaacgtaTccggaatgccgggTaggccgTgacgATcagacACGCCAAAGCTTcgtgaTGGCTGTGGCGGCGAACAGgtTCTcagacccTcCgCCCcAgGaaccTtccGCGatCgcTcCGGcAcaAagCtcatgcCgGgTTAAcGTCGGCTCGTagcacTCACTaGcaGATGAgATTCGAGTgaGTCCAtTGAgGATAATTCcCTTACATCGGATTcGAATGCCGAcCcCTCCCCGgTGCTAAGATTGTGacACcgTTCTACgGCCcATGCCTgGTTTTCTCCACCGACTGCTGGAAAAACGtCATAcCgcATggCaGAGGGTTGGTTTcACCCCTATCACCTGTGCGTGGTCACGGTCCCCGAATAATAtTCGggttAACGGGCgCAgGTCgAcCcAtccGTggTgTccATgcgatGaCAGCAcTGcGGgGGcCCATtAcCCAGGGCACCTcTCATGAATAcGGCgATGgccCcACgGAcacGTGGAAAGGCTCTGGGTgGAGTTAATATGgccgaAgTtgGccTCccGAccAgGCAaagCTGGGgTATAGAAAACATTgGcTGTTCgCAcGACTTgAGTGgTtgGCGGCGtGGTcGAcGTGTCgcGCTGTGGgCTATCAcgACTccAgtAActcctctCATGTTgGCAcgctCGTggccgCAGTTgATTAgGTGAataccGTATCCGGCcgATTGGgtgTAAAgGTGTTTgAtcggaGGAGTgCaACgCGTGcAACcGgcAGAACGTAAAGGTTtGTGGGAACcttacttCCAaaTtAcggaggTgCagcgGttcaaAgAacCGctcCagAgTCATtCTCcGCCCTTGGTCGGCTgGACTGgCTGCcTggAGCgcTcgTGGAgcCgTCGATgGctGcACtgGaacacccCcgtcaTCGTacgtcAggggccAGAGTcgcTATtGCGTCcCTGATTAGTTCAGAATCCTCGtgGaTaTCCaTctcTTGATTtcCATGTgcTCGCGCCAcacccaacctggtacacctcggccTgtCctacCgTTATgAAccgtCTATACgccccTTTGgCGcaAGCAGGATCtTGAACtTTGTCGGAGGCCGGATGTTTCAGCTCTACGCGCACGGAGACATGTCTTGCCcGTCtAGGCGaccctgattCgcAgTCCGCgtccGGTgcgtccggcacattccACgcTTccgTAAGGTgcgggccACAgAACTaGGactAAGcGACAGgCAATCGAGgccTtacTcAccgcgtgcgcacTggggccgGtcaGTgGAATCTATCCAAACgTGcCagtAAgtgaCgagCGTCcgccCTgGGTgACATGaTTCTGGTGTacggTTTATgTATGgcTCGCGGTGCCAATTAGTTTTATTGACCGAGTTGTCCGTCGTACTGCCGTACCTCTAACCACcCAATAcTTGTATTGCCGgcgcgtGgcgatGtCGCcGcTAATCGGTCTGCATTGGCaTACTCGGAAcaTATTGCCAAgAgCTTCcAAATCCTCTtGCGgGTAttcttcgcCgcaAgTTgCTCtaACAAaGccctcggcGTgtTcTACtAGCTcTCATCTCACTCGAaGAGAATGGGCCACGGACGATAGGTCTTGctggTCTGTcGGATCtggtgcACcTTTatATTCGAccatgAaacgTCCcGtcCTcGctgtAAAaggTgcgAGGTTGTGgTtcTgcGTAATtccAACCCTgggcgGACTtTcCAgAcGgAggTTcggaaaGTGCACTgGCaCTATTgtGGTgTGGCTAgggGTCAcTaCGcGgcGtaTGGgcgaacctCTGtacgTCAGCCAaTAAgAAAAATATGcGTGGGGgAggcgGgTAAcggtACTAcAATTacTaCTTTtTGCCgGAtagCCttcaacacCTgcctcctTgcAgtggTGaTaGgTcAcgAATagcgtaGTCATcTGGACTCCATggTGcGCGTcCGAACcAGCcCCCCcTTCTGATTATTTCTACATCCAAACTTTCTACCACGTACgTCAAAaAAGCAGcTTAgGGCTACgtcGAcCaTTAcGACATCGAGCGTGTAgTATGCGGGAGGGcAggcGGCCTAGAGCgACGATGGCTcGGCCGCTcCATgTcCAAACCCGCTcGTACCGgATTAAAGATGGGCCAACGcTggTTTTGGATGTgGGGCCATTGTGATGTCAGGCCACTGTGTTTTcGCCTTCTGTCGaTCCcCCCcCGTGATTCcAAGAGcagAcgtCATACAGAAgCtcgTgacgAcgtcGTcGGGGGAggaAcgAcCCGGTgAgTCcgCGAATTGTATAGTtGAccATAgGcTccagccggccGTGAgaGgCTccgTGaTtTcATgCCcctccACggaacgcggcccgcggcGATCtggaAgggTCgTCGCgAAgatgCGCAcGAGGACAAcGCATGAACTTCACGTtCCgGAGAGCTaTATAGTgTtCTcCTTGAGCTcATTgATCAACTGTCCgCTtATGGAgGTTcctTagGCTGAATAtAGTACAcCATaAgTCcGGCcTTTAACTCcACGTAATTCcTTAaTgATgTTAAATCcGTgTTTTAACCAATtATACTTTTATTTTTCCGTAACcTGAGCGGATTGcCcCTATGGGCCGTCggacGcgGGcAAAAGCCGCTACGCTGGGAGgACGcCcATTAGaTAggACACAGAAAAcctctccAATCTGcGGAtAgTGggagacgatgcaaaggatctgCcccggtcggTcgtcgagcgGaacaaccgggggaatcgaaaagcgacggtcgcTgACAGgTTATGCGTCAGcCGgTCAAGACCgTGAGATGGTgAAACACGACCTTATAAGTATATGGCCCAtGGTGTTGGAgCCCTcTTAACAAcTAGATAcTAGCTTTtgACccGGgaGCCACGACgttcCgtgTGCGAgAGCGcGATAGACgTgTGGCATACaAAcCTATCgCtcAccACaaGCTCGCggggtcgccgtcgCTCGATCggCgTTATTTATCTTCAGAAACGATgtGCTCGCCAGCATCGGgGGTGCTTGGGAGgGTATTTAAgACTAGAACGGAGTcTACGCgTAATACCCATAATATcCcatgAcgtctgctgcacagCcggggcGcgtgaCcGgactaGcaTCCCcGGgCTCgGtCgcGtcCCTTGGGGTAcCTActGGcGTggCcAATGtGACgaaccccacccGgtccgtCAAACAGGCGAcgTAAacactAaacaTGccaggAGcCTAggTcgCCAGCAAtGAAGGCCtAAtCCTCGagGAggCggTgAcTCTAGAGCATgACAgaGAgggGGCTATTGTCATCGAagAATAAAAGCTAATAATCTGGgCCAACACAAGAGTACTTacGTCTcTCAGTTAtcgGaAGGGTTCTAGAtGCTGCGcGcGAGGAAgGgcgCaGCtCTcGTGgCTtCtcctgtgaCcccgcccggtccgcGGCcgcTGAGCTgcgaccccGctaGtgcCaTctcCGCTCTAGcTgTGGAgccCgGcCATCGgcCTTAAcGAGcCGgtcTcggtctgCcgtGCTTCCCggGTgTggCCgcTCTTAtgTtggcCgAtcgaAccacGtATGggccTCCtcGAGCCGtcgaGTCTTGgAATGCGAATCAATATcTAGCcTAGGGCTGcggctccatCccactataCTCATaCCTTccATTgTCGGGGaCTCGCcaTCAGgCGGcgGggGCACagAAGCGACTCCCGgGgGATGTTTAGTAcgGggcAAGTATGcATCGaAcgCctgagCGTcgAACTATAACATTCGtGCTAGTCcgGCAGAGAGACGgcGAGATTGGGAAGGGAGCTTTCCTCgACCGcACtTtTTTGcACGGGGAATAGCCTTGGGGCTCCTCgATTGcGcTaGGgGGCTGCAGCCAGAGAATCTGaAgTTTctggAATGActTCATATTtTGatTGAGCcTACCGCCAGGTcATAGGgGCGGTGACTGTGcTCAagacGGgCGCATGCGGCgCTTGTTCGCAgTGGTATCGCAAgTTTAGGCatAgAGCCTCTcTTTtAGAAACACATGGTTTcTgcACATCAcTCAGcCCTCaACGCACgTcGCcAAAGAAGCgCGgGCAAAGTGGTTcCGgCCCtggccgagTgacAcatgtAAtCgcaccgCCTGCcGCACgTgaCAcgcgagAcATactcgGCTgTCGAgAGcGCcTGTTGATGAAAAAACCTGATCgAGcAggTCAACCGgTTCgcgTCcctcCcAGGTGCTCGACacggCccggTCCACCTAGAacTAGCGacAGACCACCCCGAAAGTCGCCACTTGCTGGGACAGcAGTaCTCTGAAACAACCGGTAgTGGCGCCgCcTACGCTGgCGCAGGtTtCCCcaGCCATTAACTCTgAATGCGCACgCTGTTTTCAgGAGCgtcgTAaTTCAATCCcccGCCATCAcCctGtTAcCaatcTTaCgaATTgaccgtttagCgTgTggTAaGcAATATGcGgTAcGcCGCGTTGAcCGATgCACTTCTaGAaCcGgGTgaggcgGGTGCATCCCCCCTTATTGATATCGAGCCtCCggaccggGggacGccgGTTAACAgTGAGGCACTGGTtcAGAGGcTgtacCtAGggGGTcctCAAgATgGcGgAGGTACccCAGGTGTAcAGccCgtgCgAGcgcCTCTtcctgGcgcctatcTcagccTcgTcgTTTcggcGcGTTgggccacgttaActcccatcgGcTgAATGCTGcGTTAATCAcTGAACTACCCGtCGGtCGTGTCCgAAccTGTATgaTtCTACTgCAGgTtcACGTTcccccCGTCCGCCCGacGTTAgCCAGCGTATcACGgGTGgTTGCGGtcgcgctaAcgcagggtgcaggcagGtgagacgtagAccgGtTTcTACGAGacgAAATcGCCGGgCcTGgATCgGctGgAgctacGTTagtGtgcctggccccAgcCcGCgTACcATCgcgGTcCTgCAGCCTagTACAAAcGCTCGATcATCGCGcTggCggGTgcgCAgGGctaGCACACGctATGcAATCCGACTgGTgTCGaaCTgATCaGgTcCgggcACGAgcATTTCGCGcCGCagGCAGCATACggCGccCagcccgcgCttGAAGgTgGCTGTCCccCtcTcTcTTcCAATCCAtGGGCCgAATGTCAGAGCgTACcccGATTAcgTCCcTgGAgGAAAcTcACGTagAGAgaGggTgtCcAAgCgCGCCGcgTcTCgGCccATAgAtGAATAcgAGAAggccgGGCATCcgTgggtcccgtggtcccaActTccgggTgTatcgtGTCGTtcAcGGGcGGAATAGGTTAaAccAACAACTTTAaACCgGgcATCcTGcactggccCGGGctaAcgtgctgccgtctgcgtACTTggGGGGCTcTGtTAGGGACCCGAGTAGATTAATTATAGCgtCccAcgaggtccgctaaacgggccGtAatAAAAGAACAGCAttcggAgcgcCggcTAGAGTGTCGTTCGTGCgTTTTCGGAAAGATCGATGgTCGTCAATcCTTAcAAcCAATCGAGGATAAGTTAAGCCGgATTACACTCgTAGcCGTggCCagagcgtcGAAGAtCcTgacggtaccAgcGCcgtagCGTTCCACGgGGAGAcTTagaGcaGAGTTcGCctaaCcggcgCCccAAgtCTacTtgcgtaCCCCTTCcTATGcAAaTGCTctggCTGTTGgCcagagctaGTcGgtagcGtTGTcgtgGGCGTccggggGACCGCaGcccATAACCGCGCgCCGCTAGGgttagTGTGAcCCTAcgcGCaACAgCCTCGGTGAGCgTAccTTGGGGCCtCgCTAgGAgGCCATGTCAGGCTAtTaatgggTGTCgcTATCGAATggGcATtccgCTCAAcTACAaACgGGTCcGCGCtCGAAGGgAcTTCGTCTTATCTCCTTAgtagaATccacgGgTGGGTGAGATCAGAGCTACGCCGAGCGGGACgAAGATATAAgGGGATGcacGGCGGcTGGAATAGCGTGGTGGTCAGGTCCGCTAATGCCAATTCAGaATAGCCGaGaAACAATgGAAAGAATCcGATAcCGTCGACTGGGGCcgACccAAGGTaGtTcCCTgGCTACATCAAgATgctCAAGTgGGtaGGtgtCCGAggcaTtcaTAaCTCgGGTCgcAcGAGGGtcgaagAgcacCTTTccacgGcCcAcCAAatgcCgGTCAtCTGACGTGGTAAaATTgccTGcTCGgccCgGgGAgaCgCCcAcTGATcCCCtctGACACGTCaGGtggaGGTAGaCCGgTCATgtGGTGCGcccagcgccCTTAAACGAAGATtcGtCctCATTCAGcCccaATCTCGGCCgggAgccTGCaCatccTAGGCTAgCtgGTTACAAGCAGCGGCTTGCCAGGGTGGAAAcGgGGCCgcaaCTTTCCCGGGAA
